# Supplementary material for: Task-related hemodynamic responses are modulated by reward and task engagement
Source: PLoS Biol. 2019 Apr 19;17(4):e3000080. doi: 10.1371/journal.pbio.3000080 (PMC6493772; doi:10.1371/journal.pbio.3000080)
Supplement: S6 Data — (XLSX) [file pbio.3000080.s014.xlsx]

## Sheet: HR_Lo
0.0200717
0.0760452
0.0347587
0.014205
0.0265325
0.0251614
0.0195137
0.0182874
0.0307244
0.0290828
0.0336454
0.0245251
0.0323916
0.0276612
0.0246194
0.0302766
0.0331196
0.021262
0.0345305
0.0400901
0.0289866
0.0344954
0.0420496
0.0308688
0.0170014
0.0170014
0.0265671
0.00987467
0.0152158
0.0237759

## Sheet: HR_Hi
0.0415064
0.103887
0.0414408
0.0253312
0.0424025
0.0387406
0.0262703
0.0442915
0.0375061
0.0322604
0.0326573
0.0537013
0.0377682
0.0359668
0.0313933
0.0403662
0.0347796
0.0335827
0.0390432
0.0494875
0.0429178
0.0397898
0.0420457
0.0187908
0.0339488
0.0339488
0.0403313
0.0179046
0.0349535
0.0482714
