# Supplementary material for: Task-related hemodynamic responses are modulated by reward and task engagement
Source: PLoS Biol. 2019 Apr 19;17(4):e3000080. doi: 10.1371/journal.pbio.3000080 (PMC6493772; doi:10.1371/journal.pbio.3000080)
Supplement: S9 Data — (XLSX) [file pbio.3000080.s017.xlsx]

## Sheet: yTrcsLoRewardLoSD
-0.0137084	2.30143	4.54952	0.733159	-0.247731	-1.32675	1.29321	0.343223	1.44538	-1.01409	2.46523	-1.42101	-0.543441	0.33383	1.73072	1.88114	2.44259	1.83917	1.10067	0.896389	3.22665
-0.0974267	2.19555	4.34043	0.717343	-0.251788	-1.2865	1.22549	0.35081	1.37041	-1.03189	2.44905	-1.39704	-0.506967	0.358629	1.75015	1.88059	2.40493	1.78632	1.09793	0.927223	3.14403
-0.182551	2.07839	4.12508	0.710826	-0.259343	-1.24974	1.16175	0.35897	1.29283	-1.04961	2.42628	-1.36961	-0.465961	0.377193	1.76822	1.87562	2.36212	1.7327	1.09893	0.955048	3.06123
-0.268144	1.95784	3.90794	0.711371	-0.272052	-1.21842	1.10334	0.367312	1.21482	-1.06878	2.39613	-1.34205	-0.421166	0.38989	1.782	1.86737	2.31496	1.67894	1.10197	0.979911	2.97704
-0.350064	1.83994	3.69218	0.715588	-0.289878	-1.19243	1.05133	0.374471	1.13908	-1.09032	2.36032	-1.31841	-0.374124	0.398456	1.78906	1.85652	2.26447	1.62531	1.1031	1.00151	2.89036
-0.425212	1.72984	3.47713	0.718985	-0.31167	-1.1704	1.00681	0.379027	1.06779	-1.11474	2.3232	-1.29954	-0.328071	0.406908	1.78857	1.84377	2.21189	1.5721	1.09861	1.02004	2.80028
-0.492016	1.63121	3.25894	0.717172	-0.335313	-1.14979	0.966605	0.379417	1.00084	-1.1411	2.28621	-1.2839	-0.289051	0.419561	1.78217	1.83005	2.15872	1.51905	1.08711	1.03541	2.70775
-0.55022	1.54177	3.03842	0.708409	-0.357155	-1.12615	0.928296	0.374299	0.934199	-1.16586	2.24946	-1.26913	-0.259552	0.43734	1.77346	1.81561	2.10533	1.46517	1.07136	1.04658	2.61326
-0.601057	1.44879	2.81908	0.693116	-0.373286	-1.09513	0.88978	0.363188	0.863285	-1.18545	2.21294	-1.25282	-0.241214	0.459077	1.76311	1.79936	2.04995	1.41102	1.05615	1.05373	2.51718
-0.64653	1.34203	2.60438	0.673223	-0.382246	-1.05541	0.849059	0.34689	0.786161	-1.19766	2.17528	-1.23223	-0.234606	0.482873	1.75057	1.78228	1.99292	1.35687	1.04286	1.05621	2.4201
-0.689319	1.21887	2.39663	0.651468	-0.384549	-1.00811	0.806825	0.328336	0.702537	-1.20141	2.13241	-1.20617	-0.238464	0.506611	1.73562	1.76557	1.93503	1.30267	1.03122	1.05321	2.32192
-0.733829	1.08116	2.19648	0.632483	-0.382049	-0.955886	0.769609	0.311971	0.613394	-1.197	2.08246	-1.17595	-0.250867	0.528313	1.71742	1.75033	1.87708	1.24837	1.02065	1.04465	2.22063
-0.782009	0.933226	2.00448	0.622069	-0.377166	-0.901676	0.743493	0.299166	0.520958	-1.18635	2.02438	-1.14468	-0.270771	0.548025	1.6939	1.73746	1.81993	1.19352	1.00941	1.03091	2.11448
-0.834091	0.780218	1.82348	0.620015	-0.372783	-0.848092	0.729921	0.289459	0.428821	-1.17353	1.95802	-1.11573	-0.296989	0.565586	1.6659	1.72655	1.76348	1.13668	0.993676	1.01259	2.00301
-0.88944	0.626342	1.65626	0.621975	-0.371718	-0.797461	0.727266	0.281795	0.340313	-1.16312	1.88443	-1.0905	-0.3285	0.58084	1.6333	1.71492	1.70595	1.07648	0.97095	0.992318	1.88678
-0.946035	0.473104	1.50351	0.622598	-0.375068	-0.750857	0.732217	0.274256	0.258099	-1.15732	1.80504	-1.06681	-0.363924	0.59401	1.59567	1.70081	1.64669	1.0125	0.939424	0.971526	1.76703
-0.999353	0.323005	1.36371	0.618048	-0.382556	-0.708147	0.741201	0.263502	0.184022	-1.15684	1.72057	-1.04187	-0.401452	0.605243	1.5533	1.68338	1.58544	0.945125	0.898236	0.951039	1.64502
-1.04627	0.178806	1.23229	0.607189	-0.393016	-0.66832	0.751357	0.247886	0.118403	-1.16143	1.6324	-1.01378	-0.440496	0.614002	1.50617	1.66229	1.52213	0.875136	0.848021	0.931596	1.52127
-1.08648	0.0421618	1.10043	0.590331	-0.404714	-0.62982	0.759651	0.226724	0.059459	-1.16919	1.54175	-0.980906	-0.483208	0.619161	1.45276	1.63771	1.45693	0.803444	0.790495	0.912519	1.39658
-1.12161	-0.087297	0.965093	0.567724	-0.414748	-0.589682	0.763267	0.200146	0.00246982	-1.17544	1.45001	-0.942429	-0.528861	0.619516	1.39319	1.61037	1.39007	0.730489	0.728009	0.89055	1.27253
-1.15418	-0.213036	0.826551	0.540491	-0.420201	-0.544363	0.759968	0.16914	-0.057365	-1.17692	1.35864	-0.899276	-0.574619	0.614218	1.32798	1.58155	1.3215	0.656349	0.663642	0.864493	1.15098
-1.18626	-0.337708	0.685812	0.510557	-0.421569	-0.495036	0.748609	0.134842	-0.121502	-1.1735	1.26779	-0.854793	-0.616798	0.603261	1.25821	1.55259	1.25129	0.58181	0.599131	0.834161	1.03339
-1.2191	-0.458792	0.546244	0.479082	-0.421579	-0.445826	0.730433	0.0978146	-0.189428	-1.16691	1.17498	-0.812388	-0.652169	0.587588	1.1855	1.52381	1.1796	0.508069	0.535599	0.799938	0.919663
-1.25479	-0.571583	0.416183	0.445544	-0.423312	-0.401026	0.710324	0.0583668	-0.259763	-1.15942	1.07974	-0.775025	-0.68074	0.569241	1.11064	1.49505	1.10677	0.436245	0.473878	0.762781	0.806888
-1.29282	-0.672328	0.300454	0.410041	-0.428682	-0.362946	0.691511	0.0165913	-0.330315	-1.15275	0.98341	-0.745249	-0.708422	0.551465	1.03209	1.46613	1.03326	0.366659	0.413228	0.723433	0.692213
-1.33086	-0.760349	0.199169	0.370943	-0.437946	-0.330622	0.673376	-0.0273459	-0.397335	-1.14743	0.888122	-0.724317	-0.741061	0.536612	0.949773	1.43677	0.959435	0.298349	0.350086	0.681532	0.575884
-1.36648	-0.840212	0.109141	0.325735	-0.450892	-0.301494	0.653659	-0.0729967	-0.458049	-1.14309	0.795883	-0.710881	-0.779918	0.526388	0.864621	1.40675	0.885238	0.230815	0.283226	0.636858	0.459668
-1.39825	-0.920726	0.0254377	0.272831	-0.466348	-0.274449	0.630297	-0.12009	-0.512704	-1.13866	0.707007	-0.699268	-0.823867	0.521723	0.778157	1.37727	0.810979	0.164695	0.213459	0.589658	0.345375
-1.42623	-1.00448	-0.0554123	0.21226	-0.482152	-0.248595	0.602296	-0.169184	-0.563668	-1.13255	0.618334	-0.68298	-0.871048	0.521418	0.692168	1.3488	0.737263	0.100961	0.142612	0.540562	0.234183
-1.45228	-1.0909	-0.134111	0.14574	-0.496111	-0.222909	0.56997	-0.219758	-0.614032	-1.12348	0.525967	-0.66043	-0.919032	0.520574	0.60723	1.32124	0.664733	0.0402763	0.0727607	0.490449	0.125568
-1.47784	-1.17905	-0.21366	0.0765554	-0.50754	-0.197634	0.53546	-0.269843	-0.665821	-1.11143	0.429415	-0.632848	-0.964526	0.514926	0.521361	1.29443	0.593918	-0.0174887	0.0046562	0.439859	0.0165088
-1.50428	-1.26591	-0.293543	0.00797399	-0.518354	-0.175357	0.501402	-0.316826	-0.718799	-1.09903	0.330073	-0.60245	-1.00525	0.503613	0.433536	1.26771	0.524703	-0.0737224	-0.0639994	0.38867	-0.0928593
-1.5327	-1.34439	-0.370958	-0.056585	-0.530703	-0.157536	0.47073	-0.358594	-0.772204	-1.09084	0.229746	-0.572173	-1.04045	0.487727	0.34465	1.23933	0.455697	-0.130523	-0.13637	0.337984	-0.200752
-1.56275	-1.41117	-0.443459	-0.114502	-0.54622	-0.145811	0.445768	-0.395143	-0.825399	-1.08859	0.130249	-0.545662	-1.07056	0.469124	0.256417	1.20763	0.385274	-0.188534	-0.212942	0.288847	-0.305582
-1.59217	-1.46484	-0.509532	-0.166483	-0.566219	-0.141645	0.426047	-0.430178	-0.877566	-1.09214	0.0331533	-0.524029	-1.09671	0.449833	0.170424	1.1721	0.313563	-0.247605	-0.292682	0.242014	-0.406032
-1.62003	-1.50558	-0.568901	-0.219168	-0.591201	-0.145286	0.405343	-0.467953	-0.927986	-1.1003	-0.0610274	-0.508198	-1.12013	0.432063	0.0870344	1.13314	0.241648	-0.307475	-0.374137	0.197925	-0.501107
-1.6439	-1.53541	-0.626009	-0.278837	-0.620273	-0.155771	0.375533	-0.50955	-0.9767	-1.1108	-0.151234	-0.498624	-1.14122	0.417403	0.0039531	1.09155	0.170609	-0.367382	-0.455716	0.156034	-0.59167
-1.66065	-1.55652	-0.683966	-0.347315	-0.650559	-0.1706	0.334934	-0.55435	-1.02568	-1.11956	-0.236443	-0.494722	-1.15873	0.405762	-0.0821541	1.04827	0.101119	-0.425675	-0.536245	0.114125	-0.676671
-1.66841	-1.56912	-0.744922	-0.423783	-0.678484	-0.185102	0.285916	-0.601145	-1.07875	-1.12254	-0.316329	-0.495546	-1.17231	0.395901	-0.171162	1.00382	0.0328639	-0.481615	-0.615622	0.0702576	-0.7545
-1.66755	-1.57305	-0.810228	-0.506	-0.701873	-0.197221	0.232314	-0.64812	-1.13724	-1.11736	-0.391317	-0.500659	-1.18253	0.386295	-0.261007	0.958058	-0.035696	-0.535139	-0.691971	0.0238728	-0.824532
-1.66158	-1.56945	-0.878384	-0.590849	-0.719553	-0.206421	0.178357	-0.692197	-1.20076	-1.10314	-0.462689	-0.510034	-1.19047	0.37599	-0.349488	0.911587	-0.104585	-0.586649	-0.762679	-0.0248186	-0.886945
-1.65586	-1.56088	-0.944088	-0.674364	-0.731434	-0.212816	0.128346	-0.730614	-1.26815	-1.08047	-0.532217	-0.524006	-1.1974	0.365555	-0.434916	0.86548	-0.173019	-0.636801	-0.825911	-0.0752825	-0.942626
-1.65264	-1.55061	-1.0046	-0.753079	-0.739146	-0.218225	0.0854471	-0.762629	-1.33739	-1.05154	-0.599743	-0.542718	-1.20523	0.357257	-0.516399	0.820783	-0.240262	-0.685985	-0.881612	-0.126697	-0.994754
-1.65243	-1.54035	-1.0552	-0.825228	-0.746783	-0.227272	0.0524604	-0.789076	-1.40581	-1.02049	-0.664388	-0.565709	-1.21805	0.352047	-0.593996	0.777972	-0.305528	-0.733724	-0.931898	-0.178059	-1.04416
-1.65491	-1.52893	-1.09062	-0.890501	-0.757977	-0.242228	0.0311112	-0.811692	-1.47202	-0.990981	-0.725678	-0.592349	-1.23804	0.349911	-0.667186	0.736847	-0.367584	-0.779319	-0.978866	-0.229184	-1.09069
-1.65801	-1.51932	-1.10833	-0.949802	-0.774511	-0.264239	0.0212324	-0.832249	-1.53358	-0.964422	-0.783352	-0.622311	-1.26564	0.350317	-0.735604	0.69814	-0.425509	-0.822566	-1.02297	-0.280023	-1.13458
-1.65648	-1.51464	-1.10976	-1.00505	-0.796916	-0.293554	0.0207757	-0.851845	-1.58771	-0.940956	-0.837534	-0.653503	-1.30007	0.352045	-0.799518	0.662516	-0.4789	-0.863691	-1.06432	-0.330551	-1.17519
-1.64624	-1.51715	-1.10168	-1.05969	-0.824612	-0.329227	0.0256321	-0.870947	-1.63275	-0.920125	-0.891265	-0.683381	-1.33902	0.352824	-0.859396	0.630184	-0.528044	-0.903212	-1.10337	-0.38077	-1.20982
-1.62596	-1.52803	-1.09434	-1.11702	-0.85583	-0.369782	0.0318022	-0.890087	-1.66927	-0.900528	-0.945664	-0.709279	-1.37769	0.349921	-0.915585	0.600905	-0.573794	-0.941819	-1.14013	-0.430599	-1.23896
-1.59651	-1.54553	-1.09193	-1.17674	-0.887095	-0.413877	0.0386327	-0.909827	-1.70112	-0.879191	-1.00065	-0.729121	-1.41117	0.341149	-0.96929	0.573889	-0.617048	-0.9808	-1.17337	-0.479585	-1.26348
-1.56043	-1.56263	-1.09513	-1.23657	-0.915121	-0.45998	0.0469324	-0.9306	-1.73289	-0.854945	-1.05597	-0.743458	-1.43751	0.325084	-1.02048	0.547505	-0.658552	-1.02285	-1.20365	-0.526631	-1.28455
-1.52048	-1.57202	-1.10298	-1.29405	-0.939254	-0.507551	0.0574687	-0.952364	-1.76495	-0.828901	-1.11039	-0.757488	-1.45676	0.301503	-1.06867	0.519587	-0.700061	-1.06861	-1.23219	-0.571043	-1.30379
-1.47869	-1.57169	-1.11143	-1.3476	-0.9605	-0.556487	0.0713945	-0.974558	-1.79573	-0.803353	-1.16059	-0.775951	-1.47007	0.271879	-1.11387	0.489269	-0.74203	-1.1172	-1.26063	-0.612597	-1.32148
-1.43742	-1.5628	-1.11057	-1.39794	-0.980499	-0.606591	0.0914815	-0.99821	-1.82377	-0.780562	-1.20436	-0.799916	-1.4798	0.240378	-1.15606	0.45653	-0.784146	-1.16738	-1.29068	-0.651491	-1.33456
-1.39838	-1.54784	-1.093	-1.44962	-1.00097	-0.658144	0.117989	-1.02449	-1.84755	-0.761245	-1.24069	-0.828492	-1.49033	0.21216	-1.19528	0.421667	-0.826094	-1.21767	-1.32243	-0.688482	-1.34086
-1.36257	-1.53026	-1.05651	-1.50353	-1.02379	-0.713126	0.148134	-1.05427	-1.86538	-0.74341	-1.26966	-0.860084	-1.50553	0.188782	-1.23439	0.385595	-0.867261	-1.26674	-1.35256	-0.725486	-1.34039
-1.33023	-1.51517	-1.00309	-1.55843	-1.05011	-0.772715	0.177345	-1.08788	-1.87899	-0.724144	-1.2925	-0.892648	-1.5253	0.16965	-1.27445	0.350106	-0.906795	-1.3147	-1.37804	-0.765445	-1.33469
-1.30024	-1.50696	-0.937862	-1.61288	-1.07936	-0.834772	0.201241	-1.12461	-1.88941	-0.701569	-1.31078	-0.923812	-1.54725	0.153349	-1.31537	0.315965	-0.946068	-1.36075	-1.39902	-0.809159	-1.32601
-1.26885	-1.50625	-0.866068	-1.66489	-1.10976	-0.895262	0.218838	-1.16227	-1.89746	-0.674414	-1.32647	-0.95255	-1.56863	0.137582	-1.35682	0.283214	-0.985395	-1.40369	-1.41739	-0.855988	-1.31604
-1.23281	-1.51114	-0.791463	-1.71141	-1.13928	-0.950358	0.235845	-1.19845	-1.90426	-0.642156	-1.34333	-0.978383	-1.58754	0.118403	-1.39754	0.251536	-1.02436	-1.44274	-1.43536	-0.90481	-1.305
-1.193	-1.51895	-0.719774	-1.75105	-1.16689	-0.998957	0.25932	-1.23127	-1.90951	-0.605964	-1.36229	-1.00129	-1.60404	0.0932386	-1.43436	0.220497	-1.06255	-1.47776	-1.45447	-0.954139	-1.29462
-1.15268	-1.52733	-0.653549	-1.78129	-1.19392	-1.0454	0.290857	-1.25925	-1.90928	-0.569978	-1.38252	-1.02166	-1.62116	0.0618212	-1.46527	0.189877	-1.09919	-1.50946	-1.47517	-1.00207	-1.28642
-1.11539	-1.53616	-0.592701	-1.79968	-1.22302	-1.09582	0.328973	-1.28174	-1.89996	-0.539167	-1.40292	-1.03998	-1.64019	0.0255133	-1.48921	0.160022	-1.1328	-1.53883	-1.49815	-1.04766	-1.28137
-1.08306	-1.54954	-0.535746	-1.80548	-1.25491	-1.1506	0.370998	-1.29971	-1.88083	-0.515479	-1.42186	-1.05618	-1.66136	-0.0135204	-1.50611	0.131805	-1.16252	-1.56525	-1.52352	-1.09042	-1.27995
-1.0553	-1.56821	-0.479522	-1.79996	-1.28918	-1.20711	0.413582	-1.3172	-1.85335	-0.498821	-1.43654	-1.06903	-1.68439	-0.0535551	-1.51694	0.106028	-1.18735	-1.5876	-1.55075	-1.13021	-1.28136
-1.03109	-1.5905	-0.416874	-1.78643	-1.32508	-1.26235	0.452739	-1.33896	-1.82017	-0.487907	-1.44632	-1.07772	-1.70789	-0.0939398	-1.52315	0.0832285	-1.20657	-1.60535	-1.57911	-1.16733	-1.28265
-1.00932	-1.61407	-0.341545	-1.76978	-1.3614	-1.31361	0.485202	-1.36572	-1.78383	-0.480299	-1.45187	-1.0821	-1.72871	-0.134249	-1.52676	0.0634895	-1.22032	-1.6186	-1.6081	-1.2023	-1.28203
-0.98827	-1.63624	-0.255281	-1.75228	-1.3965	-1.35829	0.507724	-1.39585	-1.74584	-0.471787	-1.45476	-1.08265	-1.74383	-0.175201	-1.53152	0.0461522	-1.22939	-1.6284	-1.63898	-1.236	-1.27942
-0.966123	-1.654	-0.164979	-1.73508	-1.42917	-1.39483	0.517913	-1.42713	-1.70885	-0.458326	-1.45688	-1.08047	-1.74991	-0.218165	-1.53812	0.0289353	-1.23557	-1.63804	-1.67568	-1.26953	-1.27553
-0.942454	-1.66386	-0.0784452	-1.71914	-1.45745	-1.42204	0.515396	-1.45728	-1.6752	-0.438524	-1.45902	-1.07773	-1.74414	-0.264184	-1.54543	0.00790499	-1.24242	-1.64866	-1.71794	-1.30219	-1.27128
-0.91979	-1.66139	-0.000111469	-1.70331	-1.47922	-1.43977	0.502236	-1.48419	-1.64663	-0.412808	-1.46023	-1.07814	-1.7257	-0.313493	-1.55216	-0.0178786	-1.25092	-1.66018	-1.76266	-1.33242	-1.26732
-0.901092	-1.64274	0.0716452	-1.68192	-1.49336	-1.44927	0.483649	-1.50759	-1.62411	-0.382628	-1.46051	-1.08362	-1.69641	-0.365861	-1.55672	-0.0473483	-1.26055	-1.6723	-1.80631	-1.35906	-1.26405
-0.887311	-1.6066	0.139978	-1.65219	-1.50052	-1.4522	0.465638	-1.52723	-1.60655	-0.350082	-1.45845	-1.09474	-1.66211	-0.420515	-1.55675	-0.0788376	-1.27054	-1.68379	-1.84624	-1.38176	-1.2615
-0.878146	-1.5554	0.206263	-1.61542	-1.50399	-1.44927	0.449802	-1.54319	-1.58975	-0.317657	-1.45186	-1.11116	-1.63136	-0.474742	-1.55216	-0.11032	-1.27945	-1.6912	-1.88178	-1.4017	-1.25875
-0.872521	-1.49701	0.271829	-1.57524	-1.50816	-1.44122	0.435489	-1.55604	-1.57129	-0.286104	-1.43937	-1.13109	-1.60703	-0.524797	-1.54378	-0.139233	-1.28441	-1.69213	-1.91337	-1.42232	-1.25437
-0.868894	-1.44194	0.338047	-1.53578	-1.51414	-1.42944	0.421569	-1.56625	-1.55132	-0.255669	-1.42099	-1.15029	-1.58858	-0.567747	-1.5331	-0.163915	-1.28426	-1.68619	-1.93894	-1.44476	-1.24719
-0.86546	-1.39379	0.404734	-1.4989	-1.52136	-1.41606	0.405865	-1.57371	-1.53103	-0.226366	-1.39837	-1.16486	-1.5742	-0.603455	-1.52188	-0.183488	-1.27915	-1.67456	-1.95574	-1.46873	-1.23712
-0.860303	-1.35226	0.469802	-1.46154	-1.52892	-1.40339	0.383786	-1.57864	-1.51168	-0.197987	-1.37499	-1.17375	-1.56019	-0.636169	-1.51062	-0.197873	-1.27021	-1.65921	-1.9623	-1.49361	-1.22633
-0.851295	-1.31578	0.532824	-1.41969	-1.53521	-1.39205	0.353484	-1.57994	-1.49398	-0.17028	-1.35326	-1.17765	-1.53923	-0.67083	-1.49751	-0.20777	-1.25909	-1.64183	-1.95893	-1.51794	-1.21879
-0.836491	-1.28023	0.589575	-1.37288	-1.53704	-1.37948	0.316408	-1.57612	-1.47808	-0.142907	-1.33488	-1.17805	-1.50629	-0.709571	-1.48122	-0.21425	-1.24677	-1.62296	-1.94851	-1.53874	-1.2154
-0.814931	-1.23673	0.634058	-1.32261	-1.53324	-1.3656	0.276134	-1.56646	-1.46324	-0.11628	-1.32075	-1.17682	-1.46043	-0.752994	-1.46043	-0.218674	-1.23242	-1.60364	-1.93588	-1.55401	-1.21514
-0.78751	-1.18018	0.662317	-1.27093	-1.52396	-1.35237	0.236761	-1.55123	-1.44768	-0.092206	-1.30969	-1.17637	-1.40373	-0.800637	-1.43408	-0.22254	-1.21521	-1.58431	-1.92173	-1.56234	-1.21641
-0.75792	-1.11074	0.674475	-1.21991	-1.51044	-1.34232	0.200033	-1.53202	-1.42904	-0.0729997	-1.29714	-1.17838	-1.34013	-0.850508	-1.40202	-0.225623	-1.19492	-1.56507	-1.9048	-1.56314	-1.21723
-0.729894	-1.03204	0.676344	-1.17186	-1.49453	-1.33748	0.162516	-1.51288	-1.40549	-0.0602175	-1.27922	-1.18255	-1.27303	-0.898984	-1.36511	-0.226913	-1.17175	-1.54596	-1.88423	-1.55707	-1.21502
-0.704464	-0.949189	0.677021	-1.1302	-1.4773	-1.33776	0.119614	-1.49586	-1.37718	-0.0536177	-1.25385	-1.18743	-1.20406	-0.944002	-1.32531	-0.225653	-1.14636	-1.5267	-1.85861	-1.54556	-1.20793
-0.681266	-0.865492	0.680537	-1.09715	-1.45799	-1.33983	0.0703291	-1.48178	-1.34833	-0.049945	-1.22033	-1.19147	-1.13512	-0.982849	-1.28639	-0.221445	-1.11946	-1.50672	-1.82493	-1.53095	-1.19443
-0.65946	-0.779459	0.688405	-1.07344	-1.43617	-1.34059	0.0157269	-1.47086	-1.32539	-0.0441735	-1.17959	-1.19383	-1.06645	-1.01294	-1.25072	-0.214329	-1.09171	-1.48776	-1.78359	-1.51701	-1.17372
-0.637553	-0.688044	0.700956	-1.05836	-1.41145	-1.33821	-0.0422631	-1.46156	-1.30969	-0.0342328	-1.13378	-1.19554	-0.997101	-1.03343	-1.21954	-0.206504	-1.06551	-1.47073	-1.736	-1.5049	-1.14613
-0.612692	-0.59032	0.71507	-1.04971	-1.38349	-1.33148	-0.101303	-1.44903	-1.29937	-0.0197575	-1.08646	-1.20014	-0.926123	-1.04548	-1.1932	-0.199506	-1.04253	-1.45576	-1.68442	-1.49425	-1.11295
-0.583045	-0.486728	0.721101	-1.04356	-1.35245	-1.31991	-0.158599	-1.42932	-1.29161	-0.00120868	-1.0419	-1.20878	-0.852592	-1.05245	-1.17012	-0.194369	-1.02365	-1.44255	-1.63163	-1.48427	-1.07647
-0.548975	-0.378544	0.711734	-1.03576	-1.31877	-1.30459	-0.210604	-1.40117	-1.28319	0.0193054	-1.00217	-1.22092	-0.774884	-1.05874	-1.14561	-0.191732	-1.00903	-1.43009	-1.57827	-1.47344	-1.0395
-0.512315	-0.267678	0.684779	-1.02443	-1.28324	-1.28994	-0.254123	-1.36519	-1.27025	0.0370235	-0.967773	-1.23542	-0.693414	-1.06611	-1.1158	-0.190799	-0.997473	-1.41636	-1.52013	-1.4586	-1.00282
-0.475327	-0.156654	0.641826	-1.00903	-1.24871	-1.28155	-0.28692	-1.32337	-1.24988	0.0486289	-0.937968	-1.2504	-0.611422	-1.07497	-1.079	-0.188114	-0.98563	-1.39973	-1.45343	-1.43857	-0.966212
-0.439331	-0.0501687	0.587281	-0.989731	-1.2169	-1.27997	-0.308468	-1.27804	-1.2201	0.0524111	-0.910628	-1.26303	-0.533613	-1.08492	-1.03512	-0.180346	-0.970614	-1.37837	-1.37784	-1.41376	-0.929321
-0.403645	0.0472941	0.525905	-0.968108	-1.18862	-1.28264	-0.320781	-1.23164	-1.18023	0.04793	-0.88122	-1.27076	-0.463941	-1.09422	-0.985406	-0.165934	-0.950987	-1.3506	-1.29525	-1.38566	-0.891232
-0.367071	0.132234	0.460999	-0.948446	-1.16407	-1.28625	-0.329421	-1.18703	-1.1312	0.036068	-0.845523	-1.27088	-0.402813	-1.09861	-0.93197	-0.144643	-0.92628	-1.31581	-1.20864	-1.3563	-0.849575
-0.328969	0.203123	0.396329	-0.933843	-1.14195	-1.2879	-0.340243	-1.14542	-1.07505	0.0186895	-0.802823	-1.2612	-0.344566	-1.09492	-0.877968	-0.117422	-0.896888	-1.27489	-1.12055	-1.32678	-0.803611
-0.288965	0.262233	0.335066	-0.923504	-1.11849	-1.28563	-0.355383	-1.10683	-1.0148	-0.0016989	-0.754849	-1.24113	-0.282221	-1.08248	-0.826997	-0.0861397	-0.864189	-1.23115	-1.03195	-1.29656	-0.754568
-0.247	0.31863	0.27952	-0.914468	-1.09033	-1.27929	-0.374978	-1.0707	-0.953938	-0.0229272	-0.704463	-1.21221	-0.212883	-1.0628	-0.780114	-0.053652	-0.831111	-1.18911	-0.945226	-1.26604	-0.704833
-0.20359	0.383762	0.230752	-0.90355	-1.05609	-1.26837	-0.398324	-1.03567	-0.893216	-0.0442127	-0.654303	-1.17907	-0.135934	-1.03897	-0.736642	-0.0232432	-0.800676	-1.14999	-0.863026	-1.23428	-0.656885
-0.160113	0.460271	0.187132	-0.889045	-1.01573	-1.25258	-0.423188	-0.998958	-0.832078	-0.0654173	-0.606475	-1.14781	-0.052233	-1.01349	-0.695128	0.00333139	-0.773278	-1.11313	-0.787503	-1.19951	-0.611529
-0.118624	0.54565	0.142079	-0.872379	-0.970223	-1.23235	-0.444667	-0.959084	-0.769902	-0.086524	-0.563029	-1.12023	0.0352506	-0.987088	-0.65366	0.0254269	-0.747751	-1.07737	-0.719715	-1.16046	-0.566272
-0.0808369	0.635782	0.0904119	-0.857283	-0.921344	-1.20821	-0.460161	-0.91685	-0.705572	-0.108068	-0.524063	-1.09572	0.120694	-0.96179	-0.609176	0.0432504	-0.722554	-1.04083	-0.658451	-1.11685	-0.518108
-0.047975	0.725439	0.0338234	-0.844796	-0.871914	-1.18034	-0.470177	-0.874322	-0.636241	-0.131792	-0.488021	-1.07299	0.199405	-0.939193	-0.558981	0.0583051	-0.69624	-1.0001	-0.598741	-1.06982	-0.466169
-0.0204363	0.808849	-0.0222752	-0.834464	-0.824962	-1.14918	-0.477063	-0.833636	-0.561042	-0.157771	-0.452707	-1.04957	0.267836	-0.919975	-0.503543	0.0744522	-0.667741	-0.953341	-0.535739	-1.02242	-0.41079
0.00279242	0.885949	-0.0723093	-0.825382	-0.781284	-1.11378	-0.48369	-0.795745	-0.482222	-0.184273	-0.416425	-1.02027	0.323727	-0.903857	-0.445495	0.0951602	-0.637648	-0.900545	-0.468879	-0.976356	-0.352908
0.0250686	0.954618	-0.113408	-0.815909	-0.740252	-1.07283	-0.491635	-0.759959	-0.403822	-0.208689	-0.378147	-0.981588	0.367036	-0.889279	-0.387999	0.120443	-0.606444	-0.843098	-0.399847	-0.93257	-0.293941
0.0505239	1.01204	-0.147731	-0.802977	-0.700741	-1.02586	-0.499973	-0.725433	-0.32975	-0.228676	-0.336882	-0.933939	0.400319	-0.872749	-0.333022	0.148239	-0.574633	-0.783123	-0.330787	-0.891478	-0.235869
0.0804755	1.05711	-0.1805	-0.783428	-0.661301	-0.973166	-0.507163	-0.690375	-0.261122	-0.243992	-0.293711	-0.88045	0.430149	-0.851469	-0.280221	0.175982	-0.542805	-0.722056	-0.263749	-0.851997	-0.180856
0.114512	1.09027	-0.213371	-0.754609	-0.619915	-0.915665	-0.511633	-0.652335	-0.19381	-0.258644	-0.251176	-0.825192	0.464904	-0.824885	-0.228373	0.201764	-0.510896	-0.659227	-0.200603	-0.810524	-0.130768
0.151454	1.1128	-0.246606	-0.714904	-0.575814	-0.856502	-0.511826	-0.609414	-0.122541	-0.278113	-0.211778	-0.770724	0.506167	-0.794205	-0.176873	0.225176	-0.477444	-0.593372	-0.141177	-0.764198	-0.0868813
0.189384	1.12632	-0.280364	-0.664468	-0.529654	-0.798173	-0.50687	-0.561598	-0.0456518	-0.303457	-0.176543	-0.716422	0.551517	-0.761629	-0.125167	0.247383	-0.440821	-0.524389	-0.0848855	-0.711385	-0.0494251
0.225494	1.12951	-0.313125	-0.605365	-0.482945	-0.742732	-0.497401	-0.51188	0.0364999	-0.333178	-0.144457	-0.661378	0.597518	-0.728972	-0.0727619	0.268822	-0.399793	-0.452926	-0.0306795	-0.651457	-0.0171954
0.258402	1.12053	-0.339553	-0.54186	-0.437275	-0.691611	-0.486894	-0.464125	0.122528	-0.365096	-0.114193	-0.605131	0.640272	-0.697356	-0.0197982	0.289721	-0.353616	-0.379993	0.0227995	-0.585052	0.0130662
0.287245	1.09926	-0.35494	-0.479217	-0.393259	-0.643884	-0.481216	-0.42028	0.210042	-0.396653	-0.0839719	-0.54728	0.675376	-0.669041	0.0328236	0.310382	-0.302346	-0.306495	0.0759326	-0.513833	0.0450311
0.311663	1.06653	-0.356906	-0.420198	-0.349755	-0.594288	-0.482782	-0.381124	0.295681	-0.424847	-0.0515052	-0.48771	0.70249	-0.644057	0.0844967	0.330569	-0.246977	-0.232907	0.126811	-0.440456	0.0798416
0.332047	1.0232	-0.345155	-0.366084	-0.304979	-0.538116	-0.491613	-0.346495	0.376816	-0.447857	-0.0149498	-0.426714	0.721621	-0.620591	0.133095	0.349212	-0.189563	-0.160712	0.173134	-0.368094	0.117211
0.349256	0.974504	-0.321451	-0.317183	-0.257516	-0.474008	-0.506453	-0.314768	0.450188	-0.464047	0.0256803	-0.365124	0.733579	-0.596253	0.175844	0.365654	-0.132774	-0.0919835	0.213683	-0.298419	0.156304
0.364864	0.925593	-0.288854	-0.271515	-0.206258	-0.402718	-0.52444	-0.281927	0.512848	-0.472403	0.0674736	-0.305425	0.740369	-0.569172	0.210955	0.378099	-0.0784107	-0.0287217	0.248174	-0.232093	0.195581
0.381032	0.881535	-0.250931	-0.222463	-0.150765	-0.326294	-0.540323	-0.243775	0.563719	-0.473069	0.107393	-0.250307	0.743189	-0.538452	0.238674	0.384391	-0.0276852	0.0279263	0.277278	-0.169038	0.232241
0.397288	0.846552	-0.211856	-0.164165	-0.0918255	-0.247268	-0.549594	-0.198405	0.60434	-0.467224	0.143484	-0.202096	0.740445	-0.503805	0.262105	0.383344	0.0188308	0.0787213	0.302428	-0.107903	0.264768
0.411753	0.819454	-0.175118	-0.0970225	-0.0320061	-0.16835	-0.549665	-0.145651	0.640354	-0.456871	0.174448	-0.161885	0.730786	-0.465246	0.285557	0.375398	0.0621147	0.127424	0.326042	-0.0448826	0.293259
0.422748	0.788626	-0.143766	-0.0252069	0.0255742	-0.0922193	-0.539571	-0.0867367	0.679638	-0.443918	0.199985	-0.128429	0.713145	-0.423632	0.311147	0.363302	0.105817	0.178205	0.352081	0.0233585	0.318914
0.42933	0.743808	-0.119942	0.0462573	0.0788569	-0.0205296	-0.520066	-0.0239827	0.723873	-0.42872	0.221357	-0.0972142	0.687009	-0.380549	0.339871	0.351421	0.153084	0.232509	0.3829	0.096739	0.343429
0.431759	0.683671	-0.102515	0.113995	0.126617	0.0460509	-0.493567	0.039009	0.77121	-0.411188	0.242171	-0.0633527	0.653044	-0.336798	0.372008	0.34158	0.20438	0.290296	0.419597	0.17305	0.367905
0.432635	0.612042	-0.0846021	0.177678	0.168636	0.107812	-0.464975	0.0987104	0.818939	-0.391524	0.26647	-0.023694	0.612565	-0.291607	0.406018	0.334243	0.25864	0.350901	0.462249	0.249476	0.392113
0.433098	0.534568	-0.0615066	0.238199	0.20632	0.166194	-0.439846	0.153522	0.863588	-0.369608	0.29613	0.0237533	0.566971	-0.245538	0.437031	0.329322	0.314253	0.412673	0.509049	0.323995	0.415639
0.433591	0.45647	-0.0342524	0.296063	0.243761	0.224707	-0.41902	0.203258	0.900026	-0.344612	0.331543	0.0794959	0.519974	-0.198702	0.461008	0.325225	0.369698	0.472524	0.555411	0.396444	0.437915
0.434463	0.381478	-0.00663507	0.352092	0.285476	0.286872	-0.400614	0.24876	0.925934	-0.318618	0.371963	0.141469	0.47542	-0.150697	0.47686	0.317493	0.424323	0.528954	0.598033	0.46788	0.45826
0.434942	0.312433	0.0174403	0.407343	0.332803	0.352344	-0.382176	0.291862	0.941019	-0.293415	0.415367	0.203398	0.437045	-0.10102	0.485545	0.302942	0.47914	0.581512	0.63552	0.53837	0.476276
0.431697	0.250739	0.0359628	0.462079	0.385074	0.418553	-0.361168	0.336178	0.94692	-0.27037	0.45806	0.258893	0.407592	-0.0490053	0.489298	0.280839	0.533829	0.630468	0.667615	0.607716	0.492123
0.421745	0.196234	0.050358	0.51477	0.44066	0.482687	-0.334211	0.385146	0.946808	-0.250476	0.497026	0.306197	0.385991	0.00691584	0.490546	0.25216	0.587391	0.676686	0.694988	0.675928	0.50691
0.403943	0.147656	0.0643468	0.562945	0.497302	0.542866	-0.299774	0.438648	0.943048	-0.232907	0.530795	0.346463	0.364276	0.0683155	0.491191	0.218979	0.639044	0.721011	0.71915	0.742854	0.522972
0.378615	0.103286	0.079733	0.60451	0.551975	0.598519	-0.259392	0.494327	0.935681	-0.213157	0.559074	0.38223	0.335113	0.134754	0.492982	0.183308	0.688281	0.76373	0.742906	0.808034	0.54177
0.347282	0.0618346	0.0974148	0.638107	0.602692	0.650418	-0.216694	0.549324	0.925922	-0.186605	0.582629	0.416749	0.297271	0.20406	0.497137	0.145793	0.735041	0.80481	0.768936	0.871425	0.564099
0.311934	0.0247176	0.117854	0.663728	0.648697	0.699765	-0.175627	0.601583	0.913609	-0.151916	0.603098	0.454377	0.252849	0.27345	0.504294	0.106218	0.779833	0.843854	0.796957	0.931651	0.590145
0.274359	-0.00656406	0.139736	0.682915	0.690247	0.748375	-0.137863	0.650137	0.897768	-0.109924	0.623413	0.498809	0.20501	0.341435	0.51447	0.0656578	0.821493	0.880405	0.82502	0.986824	0.618868
0.236574	-0.0312103	0.157848	0.698734	0.7284	0.79811	-0.101173	0.694624	0.877857	-0.0626093	0.646646	0.550654	0.15711	0.40871	0.526791	0.0258865	0.858235	0.914312	0.851086	1.0358	0.647413
0.200663	-0.0494344	0.165909	0.715256	0.76444	0.849327	-0.0631864	0.736083	0.853494	-0.0124881	0.672982	0.608204	0.112244	0.474381	0.539061	-0.0115285	0.888918	0.945853	0.873869	1.07874	0.673389
0.168573	-0.0627063	0.161738	0.736295	0.799706	0.899797	-0.0218807	0.776762	0.823207	0.0373477	0.700815	0.668684	0.0713883	0.537935	0.550094	-0.0461592	0.913551	0.976009	0.893432	1.11781	0.695286
0.141585	-0.0749008	0.146246	0.765232	0.835346	0.947661	0.0246534	0.819024	0.787128	0.0835625	0.728123	0.729667	0.0350904	0.599696	0.560619	-0.0796295	0.933443	1.00717	0.911842	1.15694	0.712224
0.119059	-0.0936674	0.122166	0.803942	0.870924	0.991175	0.0773199	0.863773	0.74857	0.12466	0.75323	0.79029	0.00333103	0.660429	0.572308	-0.113056	0.950933	1.04073	0.93037	1.19759	0.724161
0.0964876	-0.12296	0.0931717	0.850895	0.905138	1.0288	0.135259	0.909554	0.712705	0.160547	0.77512	0.851528	-0.0245618	0.721232	0.58676	-0.144959	0.967278	1.07733	0.949912	1.23986	0.732202
0.0691279	-0.163822	0.0639211	0.899214	0.936818	1.06004	0.195591	0.954816	0.684156	0.191957	0.79422	0.913717	-0.0492624	0.784605	0.604575	-0.172768	0.983408	1.11717	0.97116	1.28354	0.739276
0.0377412	-0.215377	0.0398585	0.94241	0.965415	1.08578	0.254697	0.997866	0.663774	0.22055	0.811278	0.976864	-0.0712198	0.854198	0.624722	-0.194434	1.00026	1.15928	0.99349	1.32721	0.748638
0.00608383	-0.273795	0.0237603	0.978357	0.991072	1.10865	0.308745	1.0369	0.645735	0.249186	0.82748	1.0409	-0.0907706	0.92946	0.645291	-0.209606	1.01747	1.20144	1.01361	1.36759	0.760838
-0.0219631	-0.330445	0.0163105	1.00744	1.01504	1.13252	0.354133	1.07084	0.62354	0.279194	0.844187	1.10542	-0.105984	1.00699	0.664986	-0.220441	1.03243	1.24331	1.02798	1.40379	0.774861
-0.0440537	-0.377087	0.0167173	1.03147	1.03908	1.15982	0.388971	1.10017	0.595326	0.310217	0.861707	1.16989	-0.11417	1.08292	0.682715	-0.230032	1.0443	1.28346	1.03505	1.43485	0.789314
-0.0607265	-0.410132	0.0223351	1.05343	1.0653	1.19201	0.414714	1.12753	0.561661	0.341125	0.878275	1.23386	-0.113731	1.15492	0.697678	-0.239764	1.0531	1.31976	1.03475	1.46001	0.802715
-0.075206	-0.42924	0.0275982	1.07892	1.09539	1.22951	0.437751	1.15642	0.524249	0.370823	0.89219	1.29446	-0.104934	1.2232	0.710382	-0.250375	1.05931	1.35067	1.02821	1.47938	0.813515
-0.0880926	-0.436363	0.0283265	1.11421	1.12921	1.27074	0.46506	1.18918	0.48586	0.398858	0.902318	1.3478	-0.0910098	1.28839	0.723917	-0.262466	1.06382	1.37601	1.01744	1.49364	0.821636
-0.0989016	-0.435639	0.0243995	1.15977	1.1633	1.31093	0.499945	1.22735	0.450846	0.425633	0.907923	1.39106	-0.078837	1.35006	0.741661	-0.275288	1.06708	1.39777	1.00525	1.50362	0.827373
-0.107357	-0.435257	0.0179246	1.21202	1.19396	1.34604	0.543391	1.27141	0.423178	0.452586	0.908955	1.42432	-0.0712176	1.40786	0.764567	-0.285636	1.06849	1.41902	0.99469	1.51098	0.831383
-0.112536	-0.444338	0.0114957	1.26612	1.21979	1.37452	0.594532	1.31988	0.405495	0.481912	0.906258	1.45241	-0.0684475	1.46201	0.792076	-0.291819	1.06824	1.43956	0.987953	1.51599	0.834597
-0.111846	-0.463417	0.00710316	1.31812	1.24081	1.39646	0.650193	1.36872	0.398875	0.516025	0.902015	1.48225	-0.069826	1.51304	0.822908	-0.293462	1.06642	1.45762	0.986483	1.51836	0.837362
-0.103717	-0.487824	0.00581642	1.36659	1.25787	1.4132	0.70375	1.41465	0.402437	0.556507	0.899435	1.51581	-0.0725033	1.5626	0.85536	-0.291019	1.06304	1.47164	0.990803	1.51809	0.838568
-0.0866577	-0.511936	0.00682219	1.41246	1.2727	1.42688	0.749151	1.45542	0.413619	0.602782	0.900123	1.55246	-0.0692933	1.61437	0.887718	-0.285552	1.05823	1.48065	0.999653	1.51497	0.836802
-0.0598962	-0.531107	0.00807584	1.45515	1.28857	1.44098	0.784147	1.48958	0.427977	0.650634	0.904642	1.59095	-0.0538168	1.6669	0.91938	-0.277977	1.05206	1.48431	1.00907	1.50807	0.831288
-0.0241737	-0.542494	0.00681494	1.49376	1.3092	1.45981	0.809311	1.51696	0.440421	0.694444	0.912905	1.62864	-0.0240751	1.7159	0.949046	-0.268116	1.04449	1.48423	1.01615	1.49848	0.821814
0.0189593	-0.547848	0.000762886	1.52807	1.3359	1.48412	0.827219	1.5391	0.448957	0.731963	0.923562	1.66057	0.0186394	1.75767	0.975116	-0.255544	1.03652	1.48082	1.02064	1.48743	0.808781
0.0676666	-0.549078	-0.0101226	1.55819	1.36822	1.51225	0.841425	1.56061	0.453499	0.763077	0.933599	1.6847	0.0708519	1.79041	0.996542	-0.240681	1.02846	1.4742	1.02361	1.47621	0.793094
0.117991	-0.548501	-0.0221886	1.58465	1.40473	1.54171	0.856962	1.58768	0.454889	0.788872	0.941622	1.69971	0.128613	1.81483	1.01345	-0.224537	1.02013	1.46504	1.02644	1.46618	0.776407
0.167385	-0.548476	-0.0306693	1.60833	1.44338	1.57003	0.879804	1.6211	0.455334	0.811934	0.9466	1.70512	0.188358	1.83412	1.02763	-0.20823	1.01148	1.45336	1.03036	1.45723	0.761572
0.214169	-0.54904	-0.0323167	1.62701	1.4818	1.59529	0.91099	1.65831	0.459828	0.837712	0.947705	1.70196	0.246271	1.84977	1.04055	-0.192434	1.00224	1.4374	1.03624	1.44648	0.750146
0.257267	-0.54643	-0.0250318	1.6372	1.51907	1.61768	0.948029	1.69587	0.472067	0.872058	0.944736	1.69181	0.300179	1.86293	1.05176	-0.176985	0.991943	1.41696	1.04383	1.43216	0.742716
0.297922	-0.537289	-0.00834183	1.63667	1.55425	1.63703	0.987099	1.73047	0.491373	0.916643	0.938244	1.67552	0.349201	1.8748	1.06017	-0.1625	0.981364	1.39238	1.05221	1.41383	0.739197
0.341803	-0.516608	0.0155918	1.62539	1.58649	1.65328	1.02458	1.75942	0.514271	0.970133	0.929525	1.65407	0.3934	1.88494	1.06502	-0.149943	0.970355	1.36443	1.05996	1.39178	0.738271
0.392899	-0.479261	0.0406426	1.60573	1.61547	1.6669	1.05735	1.7822	0.536585	1.02962	0.919509	1.62829	0.434507	1.88987	1.06611	-0.140157	0.958233	1.33431	1.06574	1.36682	0.73689
0.451296	-0.423019	0.0598267	1.58241	1.64158	1.67824	1.08386	1.79805	0.555774	1.09173	0.908029	1.5993	0.477583	1.88822	1.06398	-0.13368	0.944456	1.30247	1.06939	1.33983	0.733127
0.514792	-0.349912	0.0695573	1.55899	1.66668	1.68712	1.10437	1.8068	0.572209	1.15319	0.894543	1.56859	0.526341	1.87804	1.06099	-0.130154	0.92854	1.26722	1.07344	1.31138	0.725919
0.580277	-0.266961	0.0686434	1.53869	1.69296	1.69363	1.12077	1.80948	0.586678	1.21212	0.878736	1.53664	0.578973	1.85753	1.05836	-0.127955	0.909905	1.2279	1.08174	1.28243	0.714739
0.645433	-0.184127	0.0578885	1.52402	1.71911	1.69642	1.13581	1.80725	0.600281	1.26712	0.860567	1.5017	0.63068	1.82672	1.05672	-0.125671	0.888705	1.18528	1.09525	1.25359	0.699707
0.710098	-0.108375	0.0406548	1.5139	1.742	1.69357	1.15127	1.80077	0.614722	1.31736	0.840371	1.46434	0.67677	1.78697	1.05654	-0.122861	0.864805	1.14106	1.1131	1.22526	0.681674
0.774923	-0.0446814	0.0245831	1.50036	1.75899	1.68399	1.16776	1.79162	0.631555	1.36287	0.819873	1.4269	0.715115	1.74063	1.05701	-0.119483	0.838146	1.0971	1.13373	1.19773	0.662479
0.839546	0.00458425	0.0176291	1.47624	1.76904	1.66787	1.18684	1.77942	0.651025	1.40466	0.800272	1.39238	0.747342	1.69298	1.05489	-0.115541	0.809002	1.05424	1.15518	1.17084	0.643781
0.903284	0.0430295	0.02179	1.44026	1.77389	1.64703	1.20641	1.76289	0.67118	1.44546	0.782431	1.36344	0.776425	1.64706	1.04776	-0.111303	0.777653	1.0111	1.17527	1.14388	0.625374
0.96563	0.0851455	0.0351468	1.39477	1.77781	1.62503	1.22207	1.74125	0.689203	1.48765	0.766982	1.34006	0.805237	1.60446	1.03491	-0.107302	0.743836	0.966578	1.19285	1.11756	0.606126
1.02638	0.145759	0.0540257	1.34376	1.78214	1.60416	1.22999	1.71415	0.702797	1.52967	0.753328	1.31741	0.837002	1.56587	1.01683	-0.103009	0.70769	0.921168	1.20597	1.09205	0.584982
1.08608	0.228061	0.0741601	1.29118	1.78682	1.58612	1.22888	1.68087	0.710173	1.56797	0.738719	1.29071	0.874259	1.52929	0.994783	-0.0981072	0.669662	0.876029	1.21251	1.06703	0.561336
1.14523	0.327771	0.0907376	1.24009	1.79159	1.57206	1.2215	1.64269	0.710641	1.59951	0.721118	1.25891	0.916565	1.48774	0.970171	-0.0925337	0.630475	0.832371	1.21133	1.04215	0.535275
1.20209	0.437121	0.100614	1.19353	1.79502	1.56092	1.21337	1.60223	0.705438	1.62319	0.699803	1.22295	0.958389	1.43593	0.944024	-0.0863131	0.591043	0.790814	1.20302	1.0169	0.508325
1.25394	0.547944	0.103196	1.15339	1.79319	1.54754	1.20704	1.56302	0.698609	1.64053	0.674838	1.18434	0.993751	1.37282	0.917417	-0.079902	0.551759	0.751044	1.19013	0.990466	0.481587
1.29883	0.652925	0.0999048	1.12022	1.78348	1.5279	1.20366	1.52834	0.694921	1.65518	0.646786	1.14508	1.01944	1.30025	0.891069	-0.0744002	0.511711	0.712788	1.17493	0.962398	0.455946
1.33657	0.746498	0.0932242	1.09333	1.76463	1.50108	1.20369	1.49846	0.697167	1.6698	0.616574	1.10785	1.03422	1.22181	0.865477	-0.070577	0.470286	0.676498	1.15795	0.932088	0.432091
1.36994	0.824859	0.0853276	1.0709	1.73668	1.46808	1.2053	1.46818	0.706781	1.68683	0.585347	1.07453	1.03891	1.14082	0.841004	-0.0691386	0.428287	0.64274	1.1392	0.898983	0.409552
1.40384	0.886797	0.0775882	1.04969	1.7011	1.43088	1.20293	1.43292	0.723809	1.70814	0.553999	1.04572	1.0365	1.05948	0.817429	-0.0705924	0.387218	0.611722	1.1189	0.862879	0.385394
1.43977	0.934209	0.0706009	1.02769	1.65984	1.39161	1.19275	1.3915	0.746121	1.73289	0.522787	1.02109	1.03283	0.980897	0.793871	-0.0750712	0.348486	0.583146	1.09681	0.824027	0.356325
1.47748	0.971142	0.062417	1.00529	1.61462	1.35222	1.17163	1.34456	0.768255	1.75527	0.491674	0.999693	1.0346	0.906463	0.771204	-0.0821693	0.312405	0.556296	1.07155	0.782918	0.321493
1.51627	1.00476	0.0497356	0.984051	1.56839	1.31484	1.1374	1.29374	0.785088	1.76992	0.460606	0.980525	1.04566	0.836007	0.750077	-0.0905697	0.277427	0.53038	1.04364	0.739909	0.281686
1.55432	1.04332	0.0299225	0.965438	1.52288	1.27994	1.09007	1.24116	0.794719	1.7748	0.429457	0.963273	1.06768	0.768498	0.730717	-0.0981494	0.241934	0.504786	1.01446	0.695542	0.23848
1.58765	1.08623	0.00250234	0.950238	1.47911	1.24692	1.03199	1.18982	0.797353	1.7701	0.398423	0.948945	1.10014	0.70208	0.713106	-0.1047	0.20589	0.478918	0.985885	0.650632	0.1937
1.61427	1.12782	-0.030569	0.938541	1.43766	1.21481	0.968424	1.14341	0.794532	1.7577	0.369373	0.93783	1.13974	0.633536	0.69657	-0.111106	0.16998	0.452169	0.959706	0.606064	0.149182
1.63306	1.16215	-0.0663776	0.928983	1.39756	1.18258	0.906784	1.1033	0.788837	1.74048	0.342809	0.929468	1.17897	0.561144	0.679432	-0.118304	0.134831	0.424619	0.935967	0.562163	0.106627
1.64384	1.18499	-0.100748	0.919099	1.35476	1.14928	0.849683	1.06902	0.784585	1.72277	0.318198	0.922973	1.21066	0.485716	0.660178	-0.127085	0.100982	0.397635	0.911248	0.517994	0.0672972
1.64767	1.19312	-0.128683	0.905779	1.30679	1.11554	0.796914	1.03911	0.786026	1.71024	0.294733	0.917299	1.23285	0.40957	0.637546	-0.137781	0.0690682	0.372029	0.882273	0.472837	0.0319483
1.64608	1.18625	-0.146404	0.886511	1.25445	1.08226	0.747272	1.01148	0.793586	1.70515	0.271261	0.910895	1.24694	0.335225	0.610603	-0.149148	0.0394627	0.347329	0.848413	0.427392	0.000697091
1.64032	1.16878	-0.15435	0.861394	1.20036	1.05027	0.697708	0.983784	0.805156	1.70728	0.245951	0.900407	1.25601	0.2639	0.57903	-0.161138	0.0119729	0.322403	0.810566	0.383031	-0.027284
1.63249	1.14889	-0.160109	0.835362	1.14743	1.02023	0.641952	0.955235	0.817816	1.71504	0.217084	0.884044	1.26383	0.194654	0.543535	-0.174325	-0.0141277	0.296185	0.770184	0.341029	-0.0542821
1.62347	1.13505	-0.172187	0.814569	1.09718	0.991841	0.577022	0.924985	0.829084	1.72551	0.183678	0.861464	1.27577	0.125922	0.506454	-0.189067	-0.0397579	0.268382	0.728846	0.301726	-0.0822047
1.61357	1.12996	-0.193379	0.80101	1.04852	0.962957	0.502851	0.892182	0.837209	1.73461	0.145496	0.833291	1.29727	0.0559549	0.470659	-0.205871	-0.0652643	0.240075	0.688134	0.263964	-0.110856
1.60312	1.12614	-0.223177	0.794202	0.999931	0.930336	0.421423	0.856438	0.841486	1.74146	0.102964	0.801421	1.32822	-0.0172541	0.436725	-0.225489	-0.0894059	0.21254	0.649592	0.226481	-0.139032
1.59164	1.1167	-0.25934	0.792439	0.950573	0.892541	0.33597	0.818027	0.842743	1.74484	0.0571004	0.769777	1.36456	-0.0951595	0.403987	-0.247407	-0.110499	0.186251	0.614	0.189143	-0.165565
1.57689	1.09799	-0.298032	0.792835	0.899744	0.849451	0.248706	0.777861	0.843004	1.74348	0.0092652	0.74238	1.40118	-0.177443	0.371567	-0.272183	-0.128779	0.161276	0.581474	0.152268	-0.189738
1.55873	1.06789	-0.332448	0.790857	0.84703	0.801841	0.158587	0.735799	0.844474	1.73694	-0.0396473	0.720826	1.43434	-0.261226	0.338356	-0.300734	-0.145668	0.137511	0.551693	0.116069	-0.211483
1.53858	1.02641	-0.355277	0.782615	0.792833	0.751407	0.0637956	0.690936	0.84809	1.72564	-0.0889902	0.705079	1.46328	-0.343507	0.30304	-0.333493	-0.162747	0.114346	0.52392	0.0808142	-0.23215
1.51864	0.976312	-0.36403	0.765623	0.738884	0.700966	-0.0359218	0.642316	0.852571	1.71148	-0.138104	0.694186	1.48933	-0.421714	0.266122	-0.370522	-0.181111	0.0898513	0.497488	0.047271	-0.252858
1.50111	0.923622	-0.359956	0.738794	0.687425	0.653235	-0.139845	0.589499	0.855909	1.69711	-0.186356	0.686228	1.51335	-0.493631	0.227758	-0.41158	-0.200835	0.0614577	0.47332	0.0162231	-0.274611
1.48638	0.875762	-0.346643	0.702699	0.640221	0.610269	-0.246741	0.532888	0.856176	1.68081	-0.233695	0.677611	1.53643	-0.558167	0.187938	-0.454828	-0.221764	0.0290774	0.451383	-0.0126591	-0.298179
1.47163	0.839091	-0.328618	0.659575	0.598471	0.573465	-0.355355	0.473752	0.851564	1.65865	-0.281316	0.665172	1.55978	-0.616458	0.146861	-0.499847	-0.244533	-0.00573449	0.430805	-0.040502	-0.323196
1.45416	0.81856	-0.310038	0.614066	0.562416	0.543162	-0.464761	0.413921	0.841122	1.62746	-0.329705	0.648991	1.58356	-0.673524	0.104355	-0.546863	-0.269946	-0.0411184	0.410521	-0.0685979	-0.347237
1.43295	0.816053	-0.292713	0.571389	0.53091	0.518076	-0.572578	0.3555	0.82562	1.58618	-0.377655	0.631031	1.60649	-0.735682	0.0588872	-0.595889	-0.298491	-0.0756188	0.389579	-0.097504	-0.367861
1.40795	0.828142	-0.279315	0.532304	0.500649	0.494313	-0.675765	0.300745	0.808083	1.53715	-0.423252	0.613534	1.62779	-0.804568	0.00850154	-0.647233	-0.330125	-0.10916	0.366991	-0.126026	-0.383729
1.37968	0.843521	-0.27268	0.495051	0.4674	0.467783	-0.771365	0.251329	0.792005	1.48631	-0.464935	0.598061	1.64386	-0.878954	-0.047238	-0.70225	-0.364386	-0.143242	0.340908	-0.152472	-0.394351
1.34935	0.850528	-0.274361	0.457417	0.429462	0.437833	-0.857511	0.20682	0.780388	1.43566	-0.502548	0.584565	1.64988	-0.956507	-0.107543	-0.761072	-0.400986	-0.17732	0.310116	-0.177224	-0.400142
1.31934	0.844565	-0.283558	0.417094	0.386772	0.405735	-0.935208	0.162712	0.775767	1.38533	-0.538874	0.570558	1.6427	-1.03417	-0.170974	-0.823307	-0.43985	-0.209792	0.274225	-0.201827	-0.402414
1.29283	0.825368	-0.295701	0.370704	0.340198	0.373224	-1.00984	0.113783	0.77936	1.33533	-0.578568	0.55498	1.62262	-1.10788	-0.236094	-0.888115	-0.480733	-0.239236	0.233567	-0.227804	-0.403794
1.27096	0.795438	-0.306656	0.316314	0.291722	0.342142	-1.08653	0.0594523	0.789791	1.28375	-0.622209	0.537663	1.59508	-1.17499	-0.302083	-0.954203	-0.523091	-0.264757	0.189337	-0.256069	-0.407774
1.25342	0.760183	-0.318225	0.255625	0.244928	0.314821	-1.16712	0.00177091	0.801624	1.22506	-0.667996	0.518819	1.56835	-1.23416	-0.367936	-1.02102	-0.566472	-0.285851	0.143721	-0.286435	-0.415781
1.23919	0.73024	-0.33509	0.192791	0.202337	0.292403	-1.2519	-0.0566274	0.809108	1.15665	-0.713746	0.499589	1.54626	-1.28541	-0.432042	-1.08993	-0.610711	-0.301984	0.0988027	-0.318278	-0.427832
1.22662	0.716078	-0.361331	0.132254	0.165111	0.274197	-1.3405	-0.113261	0.810134	1.07712	-0.757256	0.48255	1.53023	-1.33012	-0.49266	-1.16186	-0.654641	-0.312357	0.0557921	-0.351978	-0.443172
1.21338	0.719498	-0.398652	0.0759049	0.133344	0.25818	-1.43118	-0.165936	0.80481	0.986243	-0.796042	0.470175	1.52037	-1.37017	-0.54856	-1.23609	-0.697432	-0.316656	0.0154027	-0.38817	-0.460123
1.19806	0.736277	-0.445578	0.0209111	0.106143	0.241999	-1.52024	-0.213776	0.794539	0.885479	-0.828591	0.465203	1.51354	-1.40803	-0.600025	-1.311	-0.738615	-0.315411	-0.0220344	-0.427169	-0.475495
1.17988	0.759567	-0.498049	-0.0364427	0.0820433	0.224529	-1.60639	-0.256334	0.782002	0.77676	-0.854013	0.469925	1.50095	-1.44739	-0.649717	-1.38492	-0.777927	-0.309654	-0.0571856	-0.469069	-0.486848
1.15851	0.782937	-0.552791	-0.0978343	0.0584757	0.206748	-1.68948	-0.293856	0.77222	0.661092	-0.87237	0.485015	1.47584	-1.48814	-0.699808	-1.45728	-0.815909	-0.300798	-0.0926375	-0.514172	-0.493623
1.13415	0.801944	-0.606341	-0.163863	0.0318999	0.189476	-1.76998	-0.327322	0.770205	0.540344	-0.88477	0.508983	1.43573	-1.52798	-0.750262	-1.52926	-0.854705	-0.291719	-0.130518	-0.562603	-0.496549
1.10748	0.814514	-0.655476	-0.234204	0.00257884	0.17397	-1.84876	-0.35764	0.776955	0.416215	-0.892558	0.537051	1.38128	-1.56457	-0.800123	-1.60105	-0.896366	-0.283738	-0.170184	-0.614079	-0.497038
1.07965	0.819902	-0.700692	-0.307317	-0.0269256	0.161762	-1.92629	-0.385128	0.790609	0.290592	-0.896753	0.56221	1.31563	-1.59611	-0.848493	-1.67248	-0.941064	-0.277244	-0.209557	-0.667815	-0.496522
1.05104	0.818987	-0.750239	-0.380271	-0.053885	0.153802	-2.00186	-0.410308	0.807991	0.165475	-0.898928	0.582117	1.24285	-1.62077	-0.894742	-1.74342	-0.987843	-0.272411	-0.246608	-0.722742	-0.496531
1.0213	0.813881	-0.812194	-0.449673	-0.0763992	0.149857	-2.07402	-0.432626	0.826026	0.0410624	-0.899502	0.597215	1.16722	-1.63844	-0.938749	-1.81387	-1.03548	-0.268275	-0.280398	-0.778209	-0.49879
0.989867	0.806569	-0.88782	-0.511821	-0.0935578	0.14809	-2.14174	-0.451203	0.842483	-0.0860239	-0.898441	0.608979	1.09359	-1.65119	-0.981937	-1.88388	-1.08294	-0.261642	-0.312379	-0.834874	-0.502857
0.956419	0.798708	-0.974182	-0.56347	-0.106033	0.145479	-2.20459	-0.465742	0.856221	-0.21645	-0.895931	0.620441	1.02399	-1.6627	-1.025	-1.95313	-1.12986	-0.250886	-0.346224	-0.893236	-0.506914
0.921011	0.791364	-1.06668	-0.603309	-0.114976	0.139908	-2.26278	-0.476404	0.866695	-0.348359	-0.891734	0.637598	0.958445	-1.67676	-1.06826	-2.02026	-1.17679	-0.236463	-0.382517	-0.952495	-0.509107
0.884141	0.781158	-1.16092	-0.633097	-0.122205	0.129946	-2.31741	-0.483507	0.874082	-0.478844	-0.884268	0.664552	0.896086	-1.69451	-1.11201	-2.08575	-1.22372	-0.219988	-0.420065	-1.01118	-0.508377
0.84729	0.762428	-1.25403	-0.658845	-0.129726	0.115059	-2.37149	-0.489294	0.879157	-0.605154	-0.873805	0.702076	0.834741	-1.71328	-1.15571	-2.15137	-1.27035	-0.203332	-0.45741	-1.06784	-0.504827
0.81198	0.730739	-1.34396	-0.687512	-0.138048	0.0964683	-2.43047	-0.496052	0.882854	-0.726858	-0.862179	0.748466	0.770073	-1.73207	-1.19686	-2.21886	-1.3164	-0.187389	-0.492821	-1.12199	-0.499732
0.779647	0.685355	-1.42803	-0.7223	-0.145344	0.0778137	-2.49599	-0.505922	0.886739	-0.848285	-0.851961	0.800512	0.70048	-1.74888	-1.23277	-2.28908	-1.36148	-0.171012	-0.523595	-1.17489	-0.494386
0.75122	0.630616	-1.50388	-0.764147	-0.15103	0.0621095	-2.56704	-0.520396	0.892663	-0.974769	-0.845399	0.855414	0.627554	-1.76083	-1.26288	-2.36126	-1.40471	-0.152611	-0.547168	-1.2277	-0.490201
0.726142	0.573474	-1.57041	-0.812419	-0.153544	0.0515748	-2.64182	-0.538785	0.898716	-1.10699	-0.8427	0.911855	0.554657	-1.76604	-1.28816	-2.434	-1.44466	-0.131481	-0.562193	-1.28008	-0.488304
0.701267	0.519232	-1.62861	-0.864147	-0.150799	0.0477273	-2.7176	-0.556806	0.90093	-1.24302	-0.840449	0.968262	0.485291	-1.76451	-1.31027	-2.50756	-1.48055	-0.107503	-0.568718	-1.33108	-0.488492
0.673214	0.472591	-1.68213	-0.912099	-0.141646	0.0507701	-2.79119	-0.570641	0.895893	-1.38041	-0.834961	1.02445	0.420678	-1.75841	-1.33087	-2.58288	-1.51233	-0.0810354	-0.568084	-1.37997	-0.488441
0.640783	0.436792	-1.73318	-0.949482	-0.126308	0.0592773	-2.86255	-0.578524	0.88246	-1.51666	-0.824815	1.0812	0.35764	-1.75094	-1.35115	-2.66061	-1.54055	-0.0529973	-0.562237	-1.42653	-0.485917
0.604107	0.409949	-1.78118	-0.974968	-0.106322	0.0692906	-2.92986	-0.580008	0.862882	-1.64962	-0.809925	1.13928	0.291551	-1.74514	-1.37223	-2.74123	-1.5663	-0.0256244	-0.553254	-1.47125	-0.479157
0.564043	0.380986	-1.82477	-0.991013	-0.0844126	0.0757802	-2.99051	-0.575854	0.84146	-1.77858	-0.791109	1.19944	0.220356	-1.74387	-1.39524	-2.82485	-1.59175	-0.00291533	-0.543741	-1.51525	-0.466852
0.522188	0.339131	-1.86317	-1.00193	-0.0631071	0.0774435	-3.0428	-0.567932	0.820472	-1.90211	-0.770081	1.26303	0.143388	-1.74885	-1.42109	-2.91024	-1.6205	0.0138108	-0.535293	-1.55891	-0.448713
0.481556	0.280987	-1.89629	-1.01187	-0.0448268	0.0753142	-3.08658	-0.559824	0.801378	-2.01879	-0.749901	1.32969	0.0608647	-1.7591	-1.4503	-2.99755	-1.65349	0.0252417	-0.528915	-1.60233	-0.425835
0.445416	0.207752	-1.92514	-1.02422	-0.0311998	0.071363	-3.12363	-0.556013	0.785131	-2.12819	-0.73409	1.39678	-0.0253222	-1.77046	-1.48245	-3.08748	-1.68986	0.0329549	-0.525236	-1.64565	-0.401084

## Sheet: yTrcsLoRewardHiSD
-0.987239	0.512963	0.205517	0.666268	0.0275699	-0.748584	0.412294	0.0338365	0.442598	-0.295867	1.05388	0.428479	-0.968739	-0.402166	1.62123	-0.464602	0.412094	-0.0181379	-0.0644122	0.00445958	-0.0596914	-0.0754195	-0.417242	0.159286	0.654197	1.22607	-0.223077	0.111997	0.33025	1.08771	-0.0678171	-0.183193	-0.454383	0.0990893	0.531467	-0.905687	0.579282	-0.598897	3.74953	1.25762	-0.454263	-0.11552	-0.431815	2.72011	-0.283291	1.11021	0.784301	-0.0326202	-0.165008	-0.329605
-0.963937	0.510825	0.213684	0.659235	0.013305	-0.772819	0.37912	0.0168254	0.469289	-0.307059	1.01796	0.40326	-0.998176	-0.417033	1.53382	-0.480291	0.366364	-0.0417032	-0.0740773	-0.0248775	-0.0619847	-0.0869387	-0.459661	0.137085	0.644734	1.1995	-0.239249	0.0930281	0.292594	1.01864	-0.0752446	-0.193574	-0.453515	0.0793274	0.484692	-0.915518	0.497704	-0.609757	3.63134	1.20979	-0.466544	-0.125518	-0.461562	2.64884	-0.305866	1.11022	0.74834	-0.0571413	-0.162317	-0.363476
-0.938484	0.50684	0.220391	0.655793	-0.000167215	-0.796658	0.342758	-0.00142059	0.492892	-0.316436	0.981502	0.376603	-1.0267	-0.430054	1.44805	-0.494855	0.320062	-0.064688	-0.084612	-0.0541497	-0.0670213	-0.0970232	-0.502222	0.112402	0.632535	1.17164	-0.256442	0.0759724	0.253454	0.952793	-0.080933	-0.202872	-0.452087	0.058907	0.437322	-0.923024	0.418417	-0.623694	3.51132	1.16208	-0.477165	-0.137325	-0.492332	2.5752	-0.329398	1.11106	0.712214	-0.080032	-0.156874	-0.396404
-0.912038	0.501199	0.224991	0.655057	-0.0131097	-0.820353	0.30167	-0.0193863	0.517293	-0.325893	0.944234	0.348239	-1.05327	-0.441381	1.36367	-0.509426	0.273642	-0.0871757	-0.095753	-0.0830403	-0.0748832	-0.105902	-0.543774	0.0859413	0.618218	1.14341	-0.274354	0.0601918	0.214399	0.890607	-0.0869021	-0.211381	-0.450999	0.0375592	0.38791	-0.928553	0.342991	-0.640618	3.38832	1.11507	-0.48544	-0.149637	-0.524001	2.50197	-0.354068	1.10982	0.675235	-0.102646	-0.149945	-0.425894
-0.886015	0.495126	0.226758	0.653271	-0.0258322	-0.843336	0.255413	-0.0355148	0.544428	-0.336863	0.906499	0.318212	-1.07749	-0.451454	1.28116	-0.525078	0.227932	-0.110546	-0.107348	-0.111297	-0.0850729	-0.114709	-0.584542	0.0587432	0.602429	1.11593	-0.292526	0.0449496	0.177246	0.831925	-0.0949575	-0.219967	-0.450711	0.0153927	0.33652	-0.932938	0.272331	-0.659927	3.26118	1.06926	-0.492	-0.160765	-0.556231	2.43044	-0.379923	1.10449	0.636994	-0.126496	-0.142755	-0.450848
-0.86164	0.489309	0.225106	0.647515	-0.0387219	-0.864633	0.204602	-0.0495909	0.575088	-0.349544	0.868374	0.286946	-1.09937	-0.461078	1.20106	-0.541919	0.183231	-0.135955	-0.119536	-0.138946	-0.0963222	-0.124633	-0.625073	0.0322957	0.585703	1.09014	-0.310126	0.0295415	0.143975	0.775781	-0.105783	-0.229506	-0.451738	-0.00718008	0.284107	-0.937188	0.206725	-0.68082	3.13019	1.02421	-0.499873	-0.168784	-0.588619	2.36109	-0.406858	1.09344	0.597761	-0.152259	-0.136194	-0.471261
-0.83971	0.48405	0.220141	0.636497	-0.0522634	-0.883527	0.150817	-0.0622424	0.609248	-0.363484	0.829786	0.255696	-1.11928	-0.471099	1.12358	-0.559493	0.139496	-0.163926	-0.132167	-0.166629	-0.107176	-0.136404	-0.665953	0.00804675	0.56889	1.06602	-0.326905	0.0133886	0.116326	0.71989	-0.119271	-0.24043	-0.454145	-0.0296557	0.231789	-0.94174	0.145614	-0.702431	2.99656	0.97779	-0.511436	-0.172392	-0.620765	2.29402	-0.434673	1.07551	0.557746	-0.180096	-0.130717	-0.488049
-0.81977	0.479555	0.212372	0.619978	-0.0668021	-0.899919	0.0971583	-0.0743775	0.645321	-0.378	0.790726	0.225753	-1.13776	-0.481778	1.04843	-0.577203	0.096544	-0.194553	-0.145094	-0.195461	-0.117263	-0.150041	-0.707707	-0.0132034	0.55157	1.04181	-0.343007	-0.0038252	0.0949981	0.66144	-0.134811	-0.252327	-0.457522	-0.0517557	0.18039	-0.945967	0.0879743	-0.724037	2.86187	0.928671	-0.527223	-0.17192	-0.65226	2.22825	-0.463266	1.05073	0.517203	-0.209766	-0.126542	-0.502673
-0.801594	0.475425	0.202673	0.598645	-0.0823068	-0.914865	0.0470652	-0.0868384	0.679506	-0.392435	0.751059	0.198334	-1.15559	-0.49303	0.974596	-0.594521	0.0539638	-0.227507	-0.158183	-0.225839	-0.126807	-0.164986	-0.750195	-0.0312641	0.532632	1.01568	-0.358692	-0.0221559	0.0790515	0.599188	-0.151439	-0.264316	-0.46125	-0.0735851	0.130267	-0.949428	0.0322425	-0.745572	2.72714	0.876134	-0.54665	-0.17008	-0.682793	2.16115	-0.492638	1.02032	0.476473	-0.240565	-0.123597	-0.517184
-0.7849	0.470248	0.193144	0.573952	-0.0982874	-0.930598	0.00113452	-0.100349	0.709319	-0.406127	0.710338	0.174228	-1.17372	-0.50465	0.900516	-0.611066	0.0108259	-0.262156	-0.171283	-0.257659	-0.136183	-0.180853	-0.792009	-0.0465325	0.511166	0.98656	-0.374352	-0.0414304	0.0652678	0.532974	-0.167673	-0.276213	-0.46481	-0.0952723	0.0819009	-0.951605	-0.0243195	-0.767312	2.59183	0.819913	-0.568547	-0.169661	-0.712446	2.09154	-0.522516	0.987033	0.435584	-0.271073	-0.121574	-0.533893
-0.769169	0.463784	0.184574	0.548554	-0.114136	-0.947614	-0.0419171	-0.115337	0.732854	-0.418505	0.668459	0.152962	-1.19177	-0.516277	0.825417	-0.626937	-0.0339409	-0.297585	-0.184381	-0.290569	-0.14597	-0.197193	-0.831825	-0.0598874	0.486796	0.953917	-0.390413	-0.0612894	0.0499212	0.463305	-0.182306	-0.288144	-0.467715	-0.117129	0.0357973	-0.951935	-0.0825324	-0.789542	2.45562	0.760287	-0.591664	-0.172283	-0.742095	2.01885	-0.552422	0.954757	0.393749	-0.299741	-0.1201	-0.55366
-0.754286	0.456136	0.176862	0.525852	-0.129123	-0.965405	-0.0840574	-0.131766	0.748879	-0.429757	0.62535	0.131867	-1.20862	-0.527228	0.748964	-0.642341	-0.0806008	-0.33259	-0.197716	-0.323986	-0.156985	-0.213511	-0.868982	-0.0727511	0.45996	0.917855	-0.40664	-0.0810804	0.0312977	0.39153	-0.195434	-0.300247	-0.46931	-0.139607	-0.00779907	-0.950166	-0.142015	-0.812535	2.32019	0.697966	-0.614846	-0.178853	-0.772755	1.94285	-0.581874	0.924858	0.349968	-0.325911	-0.118551	-0.576257
-0.741252	0.447528	0.169539	0.506453	-0.142499	-0.983284	-0.127229	-0.149201	0.757555	-0.440603	0.581033	0.108078	-1.22335	-0.537148	0.670991	-0.657583	-0.128852	-0.366404	-0.21119	-0.357051	-0.169118	-0.229791	-0.903288	-0.0864578	0.432391	0.879263	-0.423204	-0.100237	0.00889578	0.320231	-0.207969	-0.312818	-0.470026	-0.163068	-0.0490127	-0.946486	-0.202063	-0.83687	2.18808	0.633868	-0.636853	-0.189449	-0.804407	1.86386	-0.610691	0.897228	0.303921	-0.349588	-0.116189	-0.600805
-0.731025	0.438314	0.161576	0.489226	-0.153843	-1.00028	-0.173629	-0.167035	0.760341	-0.451839	0.535689	0.0805759	-1.23558	-0.546234	0.592016	-0.67298	-0.178168	-0.398585	-0.224723	-0.389046	-0.182254	-0.247041	-0.93497	-0.101435	0.405028	0.840156	-0.440506	-0.118946	-0.0169461	0.251373	-0.220971	-0.326536	-0.471009	-0.187534	-0.0882877	-0.941542	-0.261462	-0.862787	2.0614	0.568949	-0.657394	-0.202912	-0.836459	1.78243	-0.639365	0.871235	0.2558	-0.371245	-0.113776	-0.625992
-0.724129	0.428594	0.151105	0.472587	-0.16339	-1.01482	-0.225239	-0.18487	0.760743	-0.463887	0.489484	0.0494743	-1.24593	-0.555027	0.513596	-0.688578	-0.227952	-0.42898	-0.238285	-0.419342	-0.196233	-0.266248	-0.96473	-0.117546	0.378418	0.802986	-0.458834	-0.137834	-0.0446379	0.18557	-0.235136	-0.341933	-0.473387	-0.212454	-0.126398	-0.936446	-0.317999	-0.889371	1.94045	0.503853	-0.676832	-0.216129	-0.868246	1.69903	-0.668445	0.845282	0.206111	-0.391735	-0.112894	-0.649692
-0.720661	0.417684	0.137271	0.454876	-0.172239	-1.02597	-0.28176	-0.202749	0.764158	-0.476315	0.442361	0.0155001	-1.25657	-0.564118	0.436366	-0.703975	-0.277764	-0.458068	-0.251836	-0.447481	-0.210735	-0.287864	-0.994245	-0.134391	0.352955	0.768979	-0.478326	-0.157539	-0.0703086	0.122588	-0.250382	-0.359353	-0.477668	-0.237019	-0.164231	-0.932264	-0.370769	-0.915041	1.82211	0.439117	-0.695733	-0.225744	-0.899283	1.61387	-0.69761	0.816088	0.155478	-0.412363	-0.114902	-0.669868
-0.720216	0.404691	0.119496	0.43457	-0.181495	-1.03324	-0.341134	-0.220916	0.771595	-0.48802	0.394497	-0.0199935	-1.26822	-0.573778	0.360507	-0.718769	-0.327691	-0.487247	-0.265427	-0.473361	-0.225687	-0.311917	-1.02606	-0.151335	0.328104	0.738501	-0.499032	-0.178391	-0.0903213	0.0617267	-0.265753	-0.378893	-0.483444	-0.260837	-0.20205	-0.929987	-0.419876	-0.938382	1.70209	0.375187	-0.714704	-0.230518	-0.929643	1.52695	-0.726119	0.78209	0.10447	-0.434256	-0.120257	-0.686437
-0.722101	0.389422	0.0976781	0.412051	-0.191968	-1.03664	-0.400752	-0.239762	0.781371	-0.4987	0.346112	-0.0544496	-1.28071	-0.583704	0.285985	-0.732402	-0.377502	-0.517252	-0.279201	-0.497366	-0.241566	-0.338031	-1.06064	-0.167178	0.301641	0.711247	-0.520947	-0.20026	-0.103965	0.00202515	-0.280662	-0.400324	-0.490026	-0.28375	-0.239838	-0.930224	-0.466182	-0.959043	1.58041	0.311927	-0.73431	-0.230694	-0.960155	1.43835	-0.75331	0.743253	0.0537584	-0.457849	-0.128062	-0.700708
-0.72555	0.372217	0.0724976	0.38742	-0.204257	-1.03681	-0.458924	-0.25973	0.791142	-0.508526	0.297468	-0.0850966	-1.2937	-0.593463	0.212602	-0.744298	-0.426779	-0.548266	-0.293036	-0.520606	-0.258518	-0.365596	-1.09715	-0.180967	0.27198	0.686034	-0.54422	-0.222718	-0.112554	-0.0581039	-0.294687	-0.423233	-0.496898	-0.305762	-0.277577	-0.9326	-0.511005	-0.978511	1.45924	0.248232	-0.754166	-0.227469	-0.990624	1.3483	-0.778952	0.700617	0.00417931	-0.483085	-0.136602	-0.714499
-0.729231	0.353699	0.0447959	0.360753	-0.21857	-1.0345	-0.515656	-0.281074	0.798248	-0.51782	0.248868	-0.111431	-1.30629	-0.602738	0.140162	-0.754174	-0.475162	-0.580203	-0.307061	-0.544356	-0.276851	-0.393926	-1.13441	-0.193126	0.238323	0.660473	-0.568953	-0.245356	-0.118397	-0.120309	-0.307549	-0.44713	-0.503503	-0.327196	-0.315032	-0.935109	-0.555174	-0.998715	1.34069	0.183876	-0.773759	-0.222675	-1.02033	1.25709	-0.803578	0.655873	-0.0434351	-0.509585	-0.144969	-0.729207
-0.731837	0.334511	0.0153089	0.332451	-0.234465	-1.03036	-0.571181	-0.303686	0.799869	-0.527109	0.200371	-0.134481	-1.31651	-0.611266	0.0684956	-0.762241	-0.522507	-0.612808	-0.321549	-0.56884	-0.296918	-0.422053	-1.17117	-0.204947	0.200464	0.632777	-0.59505	-0.267698	-0.123717	-0.183952	-0.319564	-0.471273	-0.509366	-0.348829	-0.351504	-0.935745	-0.598664	-1.02033	1.22649	0.119245	-0.792587	-0.218817	-1.04865	1.16482	-0.828131	0.61018	-0.0885689	-0.536744	-0.152581	-0.745524
-0.732149	0.315355	-0.0141201	0.302598	-0.250534	-1.02548	-0.626083	-0.327046	0.79623	-0.5373	0.151542	-0.155827	-1.32289	-0.618914	-0.00274099	-0.769449	-0.56911	-0.645784	-0.336709	-0.593713	-0.318859	-0.449032	-1.20631	-0.217809	0.158859	0.602158	-0.622332	-0.289316	-0.130333	-0.247087	-0.332147	-0.49515	-0.514557	-0.371189	-0.387047	-0.93381	-0.642212	-1.04341	1.11743	0.0549523	-0.810273	-0.217991	-1.0752	1.07246	-0.852623	0.562993	-0.13147	-0.563713	-0.159058	-0.764048
-0.729329	0.297592	-0.042805	0.270244	-0.265303	-1.02029	-0.681411	-0.350384	0.786831	-0.549353	0.102199	-0.17701	-1.32447	-0.625836	-0.0730775	-0.777231	-0.615358	-0.678954	-0.352619	-0.618531	-0.342545	-0.474031	-1.2401	-0.232401	0.114416	0.56851	-0.650673	-0.310238	-0.140021	-0.307836	-0.346823	-0.518388	-0.520094	-0.394699	-0.422114	-0.929399	-0.685298	-1.06766	1.01147	-0.00839292	-0.826983	-0.221207	-1.09989	0.98104	-0.876622	0.513359	-0.173429	-0.590034	-0.16488	-0.784517
-0.723788	0.281885	-0.0708876	0.234323	-0.278169	-1.01486	-0.738139	-0.372815	0.771249	-0.564002	0.0525481	-0.199294	-1.32086	-0.632665	-0.141691	-0.786243	-0.660668	-0.712502	-0.369117	-0.64277	-0.367571	-0.496591	-1.27232	-0.248113	0.0683814	0.532293	-0.679654	-0.331302	-0.153238	-0.365291	-0.364595	-0.540738	-0.526922	-0.419687	-0.457338	-0.923094	-0.726618	-1.09235	0.90879	-0.0707329	-0.843985	-0.228534	-1.12312	0.891529	-0.899771	0.461146	-0.215325	-0.615787	-0.172069	-0.805879
-0.717907	0.268305	-0.0988006	0.193954	-0.289116	-1.00925	-0.796535	-0.39344	0.750095	-0.581647	0.00297152	-0.223122	-1.31255	-0.640248	-0.208003	-0.796657	-0.704079	-0.746625	-0.385709	-0.665656	-0.393083	-0.517095	-1.30254	-0.263797	0.0223615	0.494421	-0.708852	-0.353259	-0.169291	-0.420318	-0.386018	-0.562425	-0.535663	-0.446236	-0.493299	-0.915878	-0.765132	-1.11595	0.810471	-0.133176	-0.863187	-0.239203	-1.14462	0.804638	-0.921761	0.406731	-0.257475	-0.641377	-0.182229	-0.826889
-0.713338	0.256599	-0.127458	0.148666	-0.298562	-1.00314	-0.856331	-0.411696	0.723987	-0.602215	-0.0461459	-0.248486	-1.30054	-0.649077	-0.27201	-0.808364	-0.74492	-0.781486	-0.402392	-0.686932	-0.41859	-0.537297	-1.33059	-0.279006	-0.0228241	0.45653	-0.737822	-0.37648	-0.186915	-0.475468	-0.411078	-0.584461	-0.546673	-0.474097	-0.530037	-0.909229	-0.800421	-1.13715	0.717027	-0.197168	-0.885435	-0.251922	-1.16392	0.720042	-0.942244	0.350759	-0.300013	-0.667276	-0.196187	-0.846822
-0.710508	0.246052	-0.158815	0.09873	-0.307275	-0.995332	-0.917672	-0.427847	0.692926	-0.625107	-0.0947125	-0.275015	-1.28627	-0.659367	-0.33516	-0.820756	-0.783129	-0.817167	-0.419414	-0.70685	-0.443762	-0.558792	-1.35637	-0.293585	-0.0668236	0.420273	-0.766146	-0.401113	-0.204839	-0.531684	-0.438977	-0.607321	-0.559905	-0.502554	-0.566728	-0.904424	-0.832769	-1.15499	0.629008	-0.262992	-0.910799	-0.264617	-1.18085	0.635405	-0.961291	0.293888	-0.34298	-0.69375	-0.214147	-0.865676
-0.70927	0.235303	-0.194127	0.0449965	-0.316495	-0.985593	-0.978659	-0.443497	0.658597	-0.649099	-0.143203	-0.302167	-1.27178	-0.671074	-0.400777	-0.832314	-0.819762	-0.853525	-0.436994	-0.726034	-0.468321	-0.581906	-1.37984	-0.3075	-0.109531	0.385517	-0.793864	-0.427075	-0.221807	-0.589036	-0.467891	-0.630952	-0.574858	-0.530786	-0.602676	-0.90207	-0.863642	-1.16903	0.548071	-0.33025	-0.938824	-0.274987	-1.19544	0.548213	-0.978916	0.236601	-0.386166	-0.720785	-0.235623	-0.883449
-0.709197	0.223491	-0.233277	-0.0113431	-0.327391	-0.97458	-1.03621	-0.460403	0.620442	-0.672779	-0.192134	-0.329616	-1.25808	-0.683784	-0.469105	-0.84166	-0.85702	-0.890164	-0.455295	-0.745216	-0.492449	-0.606274	-1.40134	-0.321124	-0.151506	0.351058	-0.821957	-0.454016	-0.237004	-0.647301	-0.495859	-0.655043	-0.590422	-0.558631	-0.637266	-0.902218	-0.894285	-1.17946	0.474799	-0.398369	-0.968512	-0.282938	-1.20781	0.458169	-0.995228	0.180147	-0.428994	-0.748203	-0.259662	-0.901082
-0.70966	0.210259	-0.275097	-0.0682868	-0.340409	-0.963443	-1.08785	-0.479232	0.576862	-0.695483	-0.241513	-0.357706	-1.2456	-0.696487	-0.538505	-0.848413	-0.895336	-0.926684	-0.474388	-0.764707	-0.51706	-0.631264	-1.42009	-0.335513	-0.194362	0.315567	-0.851237	-0.481211	-0.251155	-0.705492	-0.521892	-0.679201	-0.605121	-0.586274	-0.669974	-0.904447	-0.925874	-1.18712	0.40939	-0.466679	-0.998204	-0.289802	-1.21884	0.366216	-1.01053	0.126117	-0.47141	-0.775405	-0.284815	-0.920155
-0.709772	0.195549	-0.317905	-0.123882	-0.355413	-0.953331	-1.13317	-0.500008	0.526932	-0.716965	-0.291089	-0.387703	-1.23449	-0.708091	-0.607155	-0.852888	-0.934146	-0.962483	-0.493978	-0.783957	-0.542336	-0.656146	-1.43495	-0.351603	-0.238608	0.278157	-0.881557	-0.507781	-0.265947	-0.761324	-0.545592	-0.703204	-0.618231	-0.613962	-0.700606	-0.908005	-0.95932	-1.19356	0.351192	-0.534691	-1.0263	-0.297244	-1.22885	0.273567	-1.02495	0.0760605	-0.513641	-0.801531	-0.309032	-0.942005
-0.708993	0.179509	-0.360592	-0.176273	-0.371843	-0.94456	-1.17484	-0.522366	0.470273	-0.737214	-0.340593	-0.420563	-1.22403	-0.718172	-0.673404	-0.855804	-0.972755	-0.996867	-0.514111	-0.802354	-0.568384	-0.680024	-1.44538	-0.370238	-0.284056	0.238698	-0.912262	-0.533355	-0.28301	-0.812969	-0.566957	-0.727244	-0.629541	-0.642014	-0.729478	-0.91171	-0.994305	-1.20079	0.298526	-0.602697	-1.05159	-0.306603	-1.23797	0.181369	-1.03806	0.0309531	-0.556043	-0.825877	-0.331401	-0.966901
-0.7075	0.162501	-0.403296	-0.224164	-0.388966	-0.935933	-1.21654	-0.545508	0.406416	-0.756749	-0.389809	-0.456806	-1.21173	-0.726753	-0.735827	-0.857972	-1.01023	-1.02934	-0.534967	-0.819604	-0.595322	-0.702296	-1.45153	-0.392052	-0.330173	0.197989	-0.942651	-0.557887	-0.302995	-0.858786	-0.586751	-0.751696	-0.639194	-0.670912	-0.75785	-0.914368	-1.02858	-1.2096	0.250079	-0.670107	-1.07326	-0.318687	-1.24643	0.0900355	-1.04969	-0.00972989	-0.598976	-0.848404	-0.351779	-0.993731
-0.705892	0.145407	-0.445712	-0.26815	-0.405774	-0.926238	-1.26	-0.567866	0.337056	-0.777243	-0.438684	-0.496385	-1.19588	-0.734128	-0.794243	-0.860142	-1.04504	-1.05998	-0.556603	-0.83561	-0.623135	-0.722958	-1.45454	-0.41717	-0.376294	0.156673	-0.97232	-0.581518	-0.325327	-0.897669	-0.607102	-0.776765	-0.647879	-0.700755	-0.787738	-0.915882	-1.06059	-1.22001	0.206049	-0.735871	-1.09109	-0.333345	-1.25412	-0.00171056	-1.06005	-0.0488096	-0.64246	-0.870239	-0.370439	-1.02134
-0.704817	0.129248	-0.487657	-0.312287	-0.421029	-0.914913	-1.30596	-0.587869	0.264317	-0.80018	-0.487394	-0.538512	-1.17693	-0.740846	-0.848008	-0.862928	-1.07635	-1.09012	-0.579064	-0.850484	-0.651785	-0.742478	-1.45727	-0.445049	-0.422145	0.115432	-1.00154	-0.604639	-0.349165	-0.92969	-0.629734	-0.802549	-0.657069	-0.731408	-0.81966	-0.916837	-1.08913	-1.23169	0.164594	-0.799151	-1.10586	-0.350001	-1.26012	-0.0934079	-1.06958	-0.0889642	-0.686025	-0.892879	-0.388315	-1.04843
-0.704554	0.113494	-0.529256	-0.360471	-0.43454	-0.901743	-1.35452	-0.605108	0.190882	-0.825313	-0.535829	-0.581634	-1.15656	-0.747718	-0.896626	-0.866636	-1.10381	-1.12157	-0.602455	-0.864543	-0.681398	-0.761532	-1.4609	-0.47437	-0.468477	0.074932	-1.03105	-0.6279	-0.372895	-0.95606	-0.654605	-0.829045	-0.667776	-0.762559	-0.853175	-0.917977	-1.11333	-1.24376	0.123816	-0.859679	-1.11985	-0.367572	-1.26449	-0.183632	-1.07884	-0.131161	-0.729413	-0.916862	-0.407348	-1.0735
-0.704388	0.0967927	-0.570768	-0.413142	-0.446878	-0.886848	-1.40438	-0.620005	0.119492	-0.851366	-0.583758	-0.623942	-1.13675	-0.755195	-0.940323	-0.871313	-1.12765	-1.15445	-0.626498	-0.87838	-0.712065	-0.780591	-1.46563	-0.503587	-0.51651	0.0350952	-1.06082	-0.651471	-0.394323	-0.979398	-0.680671	-0.85606	-0.680441	-0.793813	-0.887517	-0.919935	-1.13314	-1.25424	0.0819199	-0.918011	-1.13547	-0.384804	-1.26744	-0.271142	-1.08808	-0.175554	-0.772212	-0.942202	-0.428566	-1.09547
-0.702657	0.0779546	-0.61252	-0.46881	-0.458892	-0.870758	-1.45216	-0.633415	0.050371	-0.876905	-0.631019	-0.663443	-1.11858	-0.763529	-0.979622	-0.876818	-1.14863	-1.1879	-0.651121	-0.892987	-0.743778	-0.79961	-1.47135	-0.531857	-0.566586	-0.00563159	-1.09044	-0.675553	-0.411685	-1.00358	-0.706671	-0.883069	-0.695102	-0.825015	-0.921686	-0.923099	-1.14937	-1.26164	0.0373122	-0.974967	-1.15309	-0.401268	-1.26931	-0.355166	-1.0969	-0.221946	-0.813901	-0.96868	-0.452156	-1.11453
-0.699055	0.0564976	-0.655121	-0.525448	-0.471369	-0.854497	-1.49552	-0.64627	-0.0217405	-0.901063	-0.677522	-0.698235	-1.1014	-0.772824	-1.01493	-0.882828	-1.1675	-1.22095	-0.676329	-0.909024	-0.776399	-0.818358	-1.47702	-0.558719	-0.618485	-0.048833	-1.11951	-0.700368	-0.424925	-1.03023	-0.731733	-0.909385	-0.711433	-0.856723	-0.954361	-0.927159	-1.16396	-1.266	-0.0096299	-1.03031	-1.17199	-0.418072	-1.27057	-0.435486	-1.10515	-0.269424	-0.854093	-0.995681	-0.47776	-1.13314
-0.694117	0.0333236	-0.698974	-0.581189	-0.48492	-0.839225	-1.53272	-0.6594	-0.101778	-0.924115	-0.723266	-0.727254	-1.08408	-0.78301	-1.04732	-0.888718	-1.18461	-1.2528	-0.702067	-0.926848	-0.809683	-0.836631	-1.47957	-0.583993	-0.671739	-0.0952797	-1.14767	-0.726009	-0.436733	-1.05961	-0.756015	-0.934611	-0.72888	-0.889804	-0.984786	-0.931751	-1.17965	-1.26838	-0.0547188	-1.08347	-1.19113	-0.4361	-1.27131	-0.512366	-1.11311	-0.316059	-0.892826	-1.02196	-0.50465	-1.15425
-0.688563	0.0107905	-0.74349	-0.634801	-0.499765	-0.825861	-1.56274	-0.673295	-0.18968	-0.946975	-0.76847	-0.751215	-1.06631	-0.793866	-1.07696	-0.894148	-1.20079	-1.28327	-0.728389	-0.946499	-0.843422	-0.854236	-1.47686	-0.60821	-0.725673	-0.145162	-1.17461	-0.752422	-0.45016	-1.09134	-0.780833	-0.958581	-0.746683	-0.92428	-1.01244	-0.93641	-1.19767	-1.27024	-0.095229	-1.13416	-1.20942	-0.456264	-1.27065	-0.585036	-1.12122	-0.361166	-0.930991	-1.04661	-0.532186	-1.1788
-0.683261	-0.0105414	-0.787487	-0.686326	-0.51587	-0.81505	-1.58592	-0.688209	-0.282524	-0.969842	-0.813058	-0.773966	-1.04807	-0.80492	-1.10382	-0.899469	-1.21639	-1.31379	-0.75569	-0.96749	-0.877782	-0.871065	-1.46837	-0.633066	-0.77944	-0.198125	-1.20012	-0.779439	-0.466751	-1.12384	-0.806408	-0.981317	-0.764147	-0.959639	-1.03717	-0.940643	-1.21828	-1.27256	-0.13162	-1.18238	-1.2255	-0.479507	-1.26798	-0.65262	-1.12991	-0.404675	-0.969984	-1.06913	-0.560121	-1.20648
-0.679246	-0.0311412	-0.829834	-0.735432	-0.532908	-0.806969	-1.60373	-0.704171	-0.376599	-0.992607	-0.856855	-0.8002	-1.02943	-0.815713	-1.12831	-0.905383	-1.23146	-1.34395	-0.784121	-0.988623	-0.91306	-0.887206	-1.45476	-0.659616	-0.832243	-0.253309	-1.22387	-0.807008	-0.487198	-1.15318	-0.832347	-1.00315	-0.781231	-0.995246	-1.05928	-0.944416	-1.2411	-1.27569	-0.165996	-1.22879	-1.2387	-0.506296	-1.26336	-0.714948	-1.13931	-0.446827	-1.00987	-1.08942	-0.588323	-1.23638
-0.677106	-0.0516837	-0.87013	-0.781832	-0.55037	-0.801061	-1.61909	-0.721007	-0.469171	-1.01514	-0.899782	-0.83081	-1.01076	-0.826487	-1.15052	-0.912516	-1.24613	-1.3724	-0.813609	-1.00893	-0.948844	-0.903084	-1.43752	-0.687942	-0.883178	-0.309373	-1.24566	-0.83525	-0.511433	-1.17665	-0.858185	-1.025	-0.798276	-1.03058	-1.07935	-0.948542	-1.26489	-1.28019	-0.200752	-1.27576	-1.24942	-0.536268	-1.25734	-0.77244	-1.14911	-0.488073	-1.04998	-1.1077	-0.617046	-1.26704
-0.677661	-0.0731992	-0.909376	-0.825654	-0.567922	-0.795499	-1.63631	-0.738415	-0.560119	-1.03713	-0.941837	-0.864477	-0.992955	-0.837849	-1.16956	-0.921061	-1.26021	-1.39802	-0.843904	-1.02784	-0.984307	-0.919514	-1.41809	-0.717574	-0.931414	-0.364821	-1.26555	-0.864303	-0.538203	-1.19401	-0.883301	-1.04799	-0.81568	-1.06558	-1.09818	-0.953779	-1.28696	-1.28577	-0.237258	-1.32353	-1.25885	-0.567847	-1.25065	-0.82644	-1.15927	-0.528671	-1.0896	-1.12447	-0.646764	-1.29649
-0.681651	-0.097515	-0.949167	-0.867118	-0.585476	-0.788065	-1.65684	-0.756005	-0.650436	-1.05801	-0.983115	-0.899237	-0.977122	-0.850342	-1.18643	-0.930567	-1.2728	-1.42011	-0.87464	-1.04506	-1.01864	-0.937056	-1.39725	-0.747792	-0.976507	-0.41849	-1.28384	-0.894209	-0.56433	-1.20668	-0.906581	-1.07225	-0.833766	-1.10051	-1.11696	-0.960715	-1.30521	-1.29144	-0.275203	-1.37119	-1.26837	-0.59871	-1.24378	-0.880453	-1.16979	-0.568241	-1.12815	-1.14041	-0.677842	-1.32324
-0.689341	-0.126047	-0.989893	-0.90616	-0.60266	-0.778297	-1.68027	-0.773755	-0.738336	-1.07729	-1.02411	-0.932882	-0.964293	-0.864182	-1.20257	-0.940253	-1.28413	-1.43858	-0.905588	-1.06058	-1.05155	-0.956059	-1.3761	-0.778039	-1.0188	-0.469492	-1.30114	-0.924891	-0.586452	-1.21693	-0.926735	-1.09731	-0.852749	-1.13481	-1.1358	-0.9698	-1.31899	-1.2962	-0.314366	-1.41782	-1.27865	-0.627615	-1.23664	-0.935301	-1.18058	-0.606023	-1.1655	-1.15605	-0.710333	-1.34606
-0.700358	-0.159742	-1.03136	-0.942564	-0.619924	-0.766803	-1.70541	-0.792059	-0.820932	-1.09415	-1.06492	-0.962755	-0.955203	-0.879032	-1.21958	-0.949514	-1.29492	-1.45437	-0.936933	-1.07484	-1.08369	-0.976632	-1.35535	-0.808314	-1.05995	-0.517398	-1.31884	-0.956204	-0.603172	-1.22657	-0.942847	-1.12259	-0.872367	-1.16749	-1.1542	-0.981158	-1.32873	-1.29952	-0.35415	-1.4624	-1.28912	-0.653955	-1.2294	-0.990297	-1.19152	-0.641484	-1.20264	-1.17164	-0.743823	-1.36425
-0.713822	-0.198868	-1.07322	-0.975596	-0.638221	-0.754554	-1.73023	-0.81147	-0.896118	-1.10778	-1.1054	-0.987363	-0.949978	-0.894038	-1.23884	-0.957805	-1.30602	-1.46702	-0.968762	-1.08894	-1.11602	-0.998407	-1.33537	-0.838996	-1.10184	-0.562772	-1.33723	-0.987857	-0.614496	-1.23635	-0.954548	-1.14754	-0.892179	-1.19781	-1.17169	-0.994422	-1.33564	-1.30168	-0.393532	-1.50359	-1.29929	-0.677579	-1.2225	-1.0447	-1.20248	-0.67439	-1.23938	-1.18728	-0.777269	-1.37791
-0.729053	-0.242812	-1.11486	-1.00455	-0.658366	-0.742652	-1.75127	-0.832395	-0.96354	-1.11789	-1.1455	-1.00618	-0.947944	-0.908848	-1.26018	-0.964757	-1.31824	-1.47561	-1.00087	-1.10398	-1.14835	-1.02025	-1.31637	-0.870113	-1.14462	-0.607633	-1.35595	-1.01945	-0.621447	-1.24747	-0.962138	-1.17193	-0.911612	-1.22563	-1.1878	-1.00855	-1.3411	-1.30362	-0.431599	-1.54144	-1.30842	-0.699393	-1.21641	-1.0972	-1.21348	-0.704861	-1.27483	-1.20302	-0.80987	-1.38801
-0.745646	-0.290469	-1.15535	-1.02933	-0.680631	-0.732254	-1.76654	-0.854818	-1.02541	-1.12487	-1.18507	-1.01968	-0.947388	-0.923355	-1.28054	-0.970599	-1.3316	-1.47975	-1.03293	-1.12004	-1.17994	-1.04107	-1.29795	-0.901532	-1.18756	-0.653402	-1.37461	-1.05052	-0.625855	-1.25981	-0.966524	-1.19626	-0.930134	-1.25178	-1.20184	-1.0222	-1.34642	-1.30602	-0.468203	-1.57579	-1.3156	-0.722087	-1.2115	-1.14513	-1.22477	-0.733466	-1.3083	-1.21875	-0.840973	-1.39654
-0.763116	-0.340447	-1.19451	-1.05041	-0.704567	-0.723707	-1.77544	-0.878168	-1.08452	-1.1299	-1.224	-1.02923	-0.946158	-0.937512	-1.29728	-0.976594	-1.3448	-1.47946	-1.06459	-1.13663	-1.21014	-1.06032	-1.27872	-0.933113	-1.22989	-0.700422	-1.39259	-1.08064	-0.630369	-1.27227	-0.969174	-1.22044	-0.947741	-1.27755	-1.21399	-1.03466	-1.35304	-1.30946	-0.505098	-1.6066	-1.32029	-0.747824	-1.20771	-1.18795	-1.23619	-0.76178	-1.33931	-1.23422	-0.870152	-1.40575
-0.780861	-0.390681	-1.23158	-1.06895	-0.729328	-0.717334	-1.7786	-0.901605	-1.14044	-1.13491	-1.2629	-1.03614	-0.943112	-0.951601	-1.30959	-0.984026	-1.35681	-1.47471	-1.09575	-1.1531	-1.23862	-1.07785	-1.25857	-0.964663	-1.27092	-0.748519	-1.40905	-1.10986	-0.637122	-1.2837	-0.971847	-1.24408	-0.965486	-1.30292	-1.22485	-1.04561	-1.36135	-1.31429	-0.54585	-1.63426	-1.32261	-0.777339	-1.20435	-1.2258	-1.24736	-0.792666	-1.36752	-1.24996	-0.897772	-1.41624
-0.798719	-0.440095	-1.26555	-1.08751	-0.754305	-0.713268	-1.77776	-0.924347	-1.19151	-1.14086	-1.30173	-1.0411	-0.937714	-0.96659	-1.31783	-0.993414	-1.36693	-1.46666	-1.12694	-1.16893	-1.2657	-1.0938	-1.23819	-0.995956	-1.31024	-0.797295	-1.42399	-1.13909	-0.647339	-1.29327	-0.975692	-1.26681	-0.984604	-1.32731	-1.23535	-1.05497	-1.37093	-1.3202	-0.591222	-1.65908	-1.32365	-0.810454	-1.20103	-1.25943	-1.2579	-0.82697	-1.3932	-1.26627	-0.925645	-1.42766
-0.817542	-0.488223	-1.29592	-1.1077	-0.778918	-0.711252	-1.77455	-0.945633	-1.23677	-1.14821	-1.34006	-1.04527	-0.929878	-0.98329	-1.32303	-1.00479	-1.37459	-1.45605	-1.15886	-1.18383	-1.29246	-1.10867	-1.21855	-1.02679	-1.34909	-0.846208	-1.43737	-1.1694	-0.661508	-1.30069	-0.981498	-1.28839	-1.00544	-1.35023	-1.24648	-1.06325	-1.38108	-1.32616	-0.640072	-1.68087	-1.32519	-0.8464	-1.19783	-1.29014	-1.26763	-0.864176	-1.41613	-1.28323	-0.955594	-1.43937
-0.837455	-0.5349	-1.32285	-1.13055	-0.802683	-0.710902	-1.77039	-0.96494	-1.27572	-1.15705	-1.37751	-1.04851	-0.920454	-1.00199	-1.3266	-1.01784	-1.37968	-1.44365	-1.19126	-1.19821	-1.31879	-1.12348	-1.20053	-1.05662	-1.38764	-0.894873	-1.44919	-1.20079	-0.679351	-1.30685	-0.989717	-1.30869	-1.02783	-1.3713	-1.25843	-1.07194	-1.39097	-1.33154	-0.690611	-1.70043	-1.32847	-0.884062	-1.19493	-1.31864	-1.27684	-0.903328	-1.43613	-1.30081	-0.9882	-1.45043
-0.857622	-0.580858	-1.34752	-1.1566	-0.825749	-0.711888	-1.76811	-0.982517	-1.30808	-1.1667	-1.41378	-1.05001	-0.91167	-1.0226	-1.33036	-1.03194	-1.38267	-1.43048	-1.22334	-1.21215	-1.34407	-1.13906	-1.18421	-1.08476	-1.4255	-0.943989	-1.45967	-1.23266	-0.699773	-1.31303	-0.999782	-1.32788	-1.05136	-1.39027	-1.27009	-1.08216	-1.39958	-1.33514	-0.740864	-1.71755	-1.33433	-0.922279	-1.19247	-1.34407	-1.28609	-0.943007	-1.45338	-1.31872	-1.02329	-1.45928
-0.876786	-0.629011	-1.37209	-1.18496	-0.849519	-0.713739	-1.76762	-0.999957	-1.33652	-1.17492	-1.4488	-1.04916	-0.904805	-1.04472	-1.33664	-1.04612	-1.38496	-1.41661	-1.25436	-1.22566	-1.36781	-1.15567	-1.16835	-1.11075	-1.46234	-0.993656	-1.46895	-1.26435	-0.720502	-1.32079	-1.00937	-1.3455	-1.07543	-1.40801	-1.28076	-1.09414	-1.40661	-1.33547	-0.788904	-1.73171	-1.34309	-0.960562	-1.19049	-1.36639	-1.2952	-0.98154	-1.46812	-1.33633	-1.06031	-1.4655
-0.893818	-0.682126	-1.39684	-1.21207	-0.8754	-0.716664	-1.76691	-1.01891	-1.36263	-1.18001	-1.48352	-1.04554	-0.900351	-1.06786	-1.3464	-1.05956	-1.38861	-1.4	-1.28396	-1.23883	-1.38962	-1.17322	-1.15158	-1.13466	-1.49762	-1.0436	-1.47704	-1.29534	-0.739619	-1.33133	-1.01692	-1.3609	-1.09931	-1.42467	-1.28985	-1.10756	-1.41256	-1.33168	-0.833376	-1.74287	-1.35404	-0.998512	-1.18886	-1.38526	-1.30362	-1.0189	-1.48036	-1.35348	-1.0984	-1.46945
-0.90862	-0.739566	-1.4211	-1.23502	-0.903729	-0.721165	-1.76381	-1.03984	-1.38756	-1.18158	-1.51765	-1.03841	-0.898328	-1.09169	-1.35949	-1.07174	-1.39431	-1.37968	-1.31263	-1.25156	-1.40921	-1.19147	-1.13283	-1.15737	-1.53018	-1.09353	-1.48465	-1.32573	-0.757218	-1.34456	-1.02261	-1.37379	-1.1225	-1.4401	-1.29685	-1.1219	-1.41847	-1.32399	-0.87234	-1.75108	-1.36502	-1.03577	-1.18722	-1.40036	-1.31094	-1.05415	-1.49103	-1.36956	-1.13679	-1.47207
-0.923116	-0.798628	-1.44423	-1.25313	-0.934162	-0.72754	-1.75669	-1.06253	-1.41258	-1.1802	-1.55027	-1.02815	-0.898319	-1.11609	-1.37514	-1.08237	-1.40187	-1.35632	-1.34161	-1.26335	-1.4273	-1.21005	-1.11124	-1.18003	-1.55925	-1.14306	-1.49147	-1.35651	-0.774536	-1.35829	-1.02747	-1.38425	-1.14448	-1.45432	-1.30162	-1.1366	-1.42542	-1.31427	-0.904051	-1.75639	-1.37426	-1.07212	-1.18525	-1.41198	-1.31694	-1.08591	-1.50057	-1.38374	-1.17587	-1.47456
-0.93967	-0.856307	-1.46547	-1.26705	-0.965984	-0.735873	-1.74447	-1.08646	-1.43715	-1.17696	-1.58065	-1.0166	-0.899693	-1.14058	-1.39211	-1.09143	-1.41072	-1.33149	-1.37081	-1.27372	-1.4439	-1.22857	-1.0864	-1.20297	-1.5842	-1.19173	-1.49667	-1.38744	-0.792978	-1.37054	-1.03267	-1.39293	-1.16481	-1.4671	-1.30448	-1.15145	-1.43379	-1.30506	-0.927966	-1.76081	-1.38046	-1.10763	-1.18267	-1.42058	-1.32188	-1.11329	-1.5093	-1.39546	-1.21495	-1.47745
-0.958488	-0.910867	-1.4837	-1.27815	-0.998403	-0.746189	-1.7277	-1.11087	-1.45668	-1.17292	-1.6084	-1.00645	-0.901768	-1.16448	-1.40866	-1.09928	-1.41988	-1.30699	-1.39943	-1.28236	-1.45871	-1.24728	-1.05888	-1.22612	-1.60474	-1.23976	-1.49968	-1.41761	-0.813527	-1.37961	-1.03895	-1.40134	-1.1833	-1.47749	-1.30641	-1.16691	-1.44291	-1.29735	-0.945039	-1.76545	-1.38273	-1.14303	-1.1793	-1.42666	-1.32652	-1.13621	-1.51764	-1.40473	-1.25274	-1.48013
-0.978586	-0.963015	-1.49937	-1.28791	-1.03085	-0.757876	-1.70743	-1.13481	-1.46762	-1.16889	-1.63382	-1.00006	-0.904081	-1.18722	-1.42399	-1.10678	-1.42774	-1.28354	-1.42675	-1.28912	-1.47166	-1.26628	-1.03066	-1.24938	-1.62128	-1.28628	-1.50025	-1.44618	-0.836666	-1.384	-1.04608	-1.40997	-1.20015	-1.48517	-1.30915	-1.18292	-1.45219	-1.29119	-0.958388	-1.77077	-1.38094	-1.17877	-1.17531	-1.43315	-1.33093	-1.15561	-1.52549	-1.41256	-1.28812	-1.48253
-0.998792	-1.01444	-1.51262	-1.29791	-1.06302	-0.770009	-1.68536	-1.15781	-1.46958	-1.1659	-1.65851	-0.997784	-0.906706	-1.2087	-1.43776	-1.11444	-1.43328	-1.25945	-1.45221	-1.29412	-1.48257	-1.28553	-1.00388	-1.27242	-1.63455	-1.32995	-1.49859	-1.47263	-0.86223	-1.38308	-1.05323	-1.41875	-1.21628	-1.49009	-1.31342	-1.19905	-1.46071	-1.28626	-0.97234	-1.77702	-1.37593	-1.21392	-1.17157	-1.44163	-1.3348	-1.17278	-1.53173	-1.42048	-1.32069	-1.48397
-1.01804	-1.06529	-1.52356	-1.30972	-1.09418	-0.781438	-1.66342	-1.17952	-1.46435	-1.16426	-1.68224	-0.996337	-0.909986	-1.22981	-1.44988	-1.12233	-1.43604	-1.233	-1.47553	-1.29769	-1.49078	-1.30499	-0.979612	-1.29472	-1.64573	-1.36975	-1.49597	-1.49689	-0.889163	-1.37766	-1.0599	-1.42752	-1.2327	-1.49253	-1.31929	-1.21486	-1.46723	-1.28151	-0.987778	-1.78345	-1.37003	-1.24691	-1.16928	-1.45264	-1.33791	-1.18725	-1.53651	-1.42862	-1.35131	-1.48338
-1.03546	-1.11515	-1.53266	-1.32358	-1.12349	-0.791138	-1.64215	-1.19971	-1.45478	-1.1637	-1.70391	-0.992182	-0.914229	-1.2515	-1.46058	-1.1303	-1.43605	-1.20461	-1.49715	-1.30036	-1.49626	-1.32447	-0.958204	-1.31692	-1.6573	-1.40557	-1.49297	-1.51943	-0.915709	-1.37072	-1.06576	-1.43574	-1.24934	-1.49311	-1.32651	-1.23003	-1.47084	-1.27455	-1.00376	-1.78725	-1.36621	-1.2765	-1.16859	-1.46624	-1.33997	-1.19791	-1.54012	-1.43637	-1.38131	-1.47996
-1.05079	-1.16367	-1.54	-1.33882	-1.15042	-0.799117	-1.61968	-1.21838	-1.44327	-1.16368	-1.72269	-0.984112	-0.919572	-1.27343	-1.47024	-1.13815	-1.43384	-1.17577	-1.5168	-1.30293	-1.4991	-1.3437	-0.939528	-1.33884	-1.67013	-1.43894	-1.48978	-1.5399	-0.940146	-1.36584	-1.07058	-1.44213	-1.26558	-1.49229	-1.3343	-1.24446	-1.47159	-1.26342	-1.01909	-1.78627	-1.36523	-1.30247	-1.16898	-1.48114	-1.34042	-1.20418	-1.54295	-1.4432	-1.41002	-1.47362
-1.06372	-1.21042	-1.54467	-1.35453	-1.17511	-0.807342	-1.59531	-1.23579	-1.43051	-1.1636	-1.73806	-0.972192	-0.925927	-1.29465	-1.4795	-1.14569	-1.43008	-1.14802	-1.53407	-1.30596	-1.49968	-1.36256	-0.922667	-1.35987	-1.68408	-1.47273	-1.48655	-1.55766	-0.962084	-1.36463	-1.07469	-1.44623	-1.28085	-1.48999	-1.34103	-1.25816	-1.47137	-1.24755	-1.03205	-1.77983	-1.36649	-1.32671	-1.16978	-1.49376	-1.33912	-1.206	-1.54545	-1.44855	-1.43593	-1.46563
-1.07411	-1.25515	-1.5464	-1.36993	-1.19875	-0.817758	-1.56774	-1.25246	-1.41785	-1.16262	-1.74995	-0.957252	-0.932676	-1.31427	-1.48884	-1.15291	-1.42556	-1.12229	-1.54886	-1.30984	-1.49867	-1.38041	-0.905341	-1.37949	-1.69884	-1.50699	-1.4829	-1.57249	-0.983834	-1.36744	-1.07958	-1.44786	-1.29478	-1.48691	-1.34555	-1.27044	-1.47303	-1.22751	-1.03951	-1.76839	-1.36881	-1.3525	-1.17038	-1.50133	-1.33606	-1.2039	-1.54761	-1.45199	-1.45788	-1.45855
-1.08218	-1.29887	-1.54507	-1.38483	-1.22267	-0.830714	-1.53539	-1.26897	-1.40683	-1.16032	-1.75992	-0.940867	-0.9391	-1.33187	-1.49753	-1.16024	-1.4213	-1.09843	-1.56121	-1.31487	-1.49651	-1.39644	-0.885346	-1.39732	-1.7134	-1.54039	-1.47751	-1.58443	-1.00844	-1.37381	-1.08739	-1.44717	-1.30739	-1.48346	-1.3473	-1.28041	-1.47725	-1.20464	-1.04001	-1.75328	-1.37072	-1.38049	-1.17043	-1.50265	-1.33147	-1.20035	-1.54848	-1.45431	-1.47552	-1.45301
-1.08824	-1.34013	-1.54079	-1.40084	-1.24687	-0.845664	-1.49743	-1.28509	-1.39876	-1.15713	-1.76803	-0.925658	-0.944419	-1.34806	-1.50425	-1.16795	-1.41732	-1.0763	-1.57128	-1.32079	-1.49288	-1.41007	-0.862334	-1.41317	-1.72566	-1.5717	-1.46983	-1.59395	-1.0366	-1.38213	-1.09887	-1.44462	-1.31972	-1.47987	-1.34621	-1.28749	-1.48345	-1.18031	-1.03419	-1.7359	-1.37009	-1.40985	-1.17014	-1.49766	-1.32578	-1.19657	-1.54759	-1.45552	-1.48979	-1.44859
-1.0921	-1.37632	-1.53412	-1.41839	-1.27068	-0.861723	-1.4542	-1.30026	-1.3945	-1.15395	-1.77368	-0.914262	-0.947979	-1.36443	-1.50794	-1.17616	-1.41306	-1.05629	-1.58024	-1.32675	-1.48818	-1.42138	-0.837114	-1.42755	-1.73506	-1.59985	-1.45938	-1.60266	-1.06765	-1.38906	-1.1137	-1.44064	-1.33201	-1.47639	-1.3427	-1.29177	-1.49069	-1.15551	-1.02424	-1.71768	-1.36541	-1.43951	-1.1692	-1.4874	-1.31924	-1.19308	-1.54475	-1.45526	-1.5031	-1.44464
-1.09315	-1.40566	-1.52551	-1.43713	-1.29341	-0.877951	-1.40722	-1.31402	-1.39351	-1.15172	-1.77661	-0.908383	-0.949919	-1.38103	-1.50838	-1.18495	-1.40797	-1.03873	-1.58825	-1.33279	-1.48295	-1.43168	-0.810896	-1.44017	-1.74162	-1.62428	-1.44588	-1.61088	-1.10049	-1.39186	-1.13101	-1.43538	-1.34408	-1.47284	-1.33749	-1.29451	-1.49769	-1.13155	-1.01302	-1.70116	-1.35624	-1.46807	-1.16711	-1.47351	-1.31169	-1.19036	-1.53997	-1.45339	-1.51588	-1.44012
-1.09148	-1.42783	-1.51503	-1.45645	-1.31456	-0.893576	-1.35935	-1.32619	-1.39333	-1.15078	-1.7764	-0.908777	-0.951901	-1.39713	-1.5067	-1.19416	-1.40158	-1.02367	-1.59498	-1.33874	-1.47779	-1.44321	-0.784816	-1.45046	-1.74574	-1.64699	-1.42953	-1.61825	-1.13368	-1.38954	-1.14962	-1.42964	-1.35574	-1.46841	-1.33161	-1.29791	-1.5028	-1.10909	-1.00203	-1.68709	-1.34321	-1.49354	-1.16353	-1.45837	-1.30333	-1.18766	-1.53355	-1.44967	-1.52765	-1.43326
-1.08785	-1.44408	-1.50393	-1.4755	-1.33395	-0.908248	-1.31267	-1.33726	-1.39331	-1.15077	-1.77197	-0.915067	-0.955736	-1.41206	-1.50508	-1.20327	-1.39356	-1.01091	-1.60026	-1.3442	-1.47329	-1.4562	-0.75943	-1.45813	-1.74816	-1.6679	-1.4108	-1.62455	-1.1655	-1.38235	-1.168	-1.42349	-1.3666	-1.46337	-1.32633	-1.30233	-1.5055	-1.08825	-0.990185	-1.67498	-1.32764	-1.51511	-1.15837	-1.44535	-1.29432	-1.18144	-1.52586	-1.44331	-1.53805	-1.42331
-1.08332	-1.4571	-1.49307	-1.49317	-1.3525	-0.921357	-1.26878	-1.34886	-1.39404	-1.1514	-1.76368	-0.925704	-0.961785	-1.42516	-1.50447	-1.21215	-1.38456	-1.00042	-1.60379	-1.34887	-1.46941	-1.46974	-0.734129	-1.46317	-1.74932	-1.68584	-1.39028	-1.62928	-1.19471	-1.37147	-1.18484	-1.41667	-1.37586	-1.45791	-1.32192	-1.30714	-1.5049	-1.06878	-0.977097	-1.66393	-1.31076	-1.53201	-1.15177	-1.43521	-1.28479	-1.16872	-1.51753	-1.434	-1.54637	-1.40958
-1.07863	-1.46859	-1.48303	-1.50876	-1.37035	-0.932297	-1.22863	-1.36131	-1.39642	-1.15189	-1.75172	-0.9377	-0.969579	-1.4359	-1.50522	-1.22036	-1.37515	-0.992251	-1.60495	-1.35256	-1.46508	-1.48282	-0.709059	-1.46585	-1.74909	-1.70003	-1.36932	-1.63139	-1.21992	-1.35849	-1.1991	-1.40893	-1.38329	-1.45208	-1.31804	-1.31161	-1.50012	-1.04996	-0.962255	-1.65268	-1.29354	-1.54381	-1.14391	-1.42704	-1.27496	-1.14945	-1.51024	-1.4217	-1.55097	-1.39164
-1.07391	-1.47992	-1.47422	-1.52062	-1.38731	-0.940807	-1.1913	-1.37418	-1.40109	-1.15114	-1.73642	-0.948001	-0.97841	-1.44481	-1.50738	-1.22728	-1.36588	-0.986094	-1.60466	-1.35547	-1.46014	-1.49441	-0.684749	-1.46748	-1.74812	-1.70971	-1.34857	-1.63124	-1.23998	-1.34556	-1.2101	-1.40001	-1.38834	-1.44594	-1.3142	-1.31488	-1.49096	-1.03016	-0.944955	-1.63934	-1.27773	-1.55083	-1.13462	-1.41953	-1.26485	-1.12543	-1.50429	-1.4067	-1.55178	-1.36972
-1.06988	-1.49225	-1.46623	-1.52683	-1.40334	-0.947102	-1.1526	-1.38697	-1.40799	-1.14825	-1.71858	-0.955406	-0.987472	-1.45148	-1.51021	-1.23245	-1.35726	-0.981203	-1.60312	-1.35816	-1.45476	-1.50369	-0.661588	-1.46828	-1.74575	-1.71366	-1.32818	-1.62905	-1.25455	-1.33513	-1.21763	-1.38947	-1.39045	-1.43934	-1.30979	-1.31568	-1.47782	-1.00809	-0.924907	-1.62338	-1.26333	-1.5538	-1.12367	-1.41106	-1.25429	-1.09921	-1.49904	-1.38965	-1.54882	-1.34441
-1.06752	-1.50508	-1.45722	-1.52636	-1.41818	-0.951961	-1.10888	-1.39896	-1.41619	-1.14314	-1.69851	-0.959863	-0.996196	-1.45516	-1.5116	-1.23585	-1.34917	-0.97664	-1.60016	-1.36021	-1.44914	-1.51106	-0.639858	-1.46795	-1.7407	-1.7121	-1.30818	-1.62498	-1.26436	-1.32742	-1.22231	-1.37793	-1.38953	-1.43174	-1.30402	-1.31381	-1.46186	-0.98418	-0.902245	-1.60489	-1.24917	-1.55361	-1.11108	-1.39944	-1.24388	-1.07262	-1.49375	-1.37106	-1.54236	-1.31641
-1.06771	-1.51544	-1.44637	-1.51967	-1.43128	-0.956165	-1.05897	-1.40916	-1.42437	-1.1371	-1.67531	-0.961953	-1.00495	-1.45553	-1.51038	-1.23822	-1.3405	-0.971912	-1.59579	-1.36067	-1.44354	-1.51622	-0.619871	-1.46634	-1.73207	-1.70469	-1.28805	-1.61945	-1.27177	-1.32116	-1.22615	-1.36574	-1.38587	-1.42307	-1.29689	-1.30919	-1.44483	-0.959899	-0.877399	-1.58437	-1.23394	-1.55188	-1.09698	-1.3841	-1.23384	-1.04559	-1.48762	-1.35081	-1.53315	-1.28666
-1.07096	-1.52259	-1.43345	-1.50946	-1.44318	-0.959682	-1.00329	-1.41753	-1.43067	-1.13184	-1.64943	-0.963052	-1.01325	-1.45256	-1.50565	-1.24071	-1.33053	-0.96753	-1.58975	-1.35881	-1.43793	-1.51864	-0.602022	-1.46313	-1.7197	-1.69126	-1.26627	-1.61249	-1.27975	-1.31473	-1.23136	-1.35309	-1.3803	-1.4129	-1.28874	-1.30196	-1.42685	-0.936829	-0.852188	-1.56269	-1.21659	-1.54887	-1.08168	-1.36548	-1.22405	-1.0175	-1.47987	-1.32941	-1.52158	-1.25562
-1.07689	-1.52555	-1.41855	-1.49964	-1.45344	-0.962179	-0.943407	-1.42345	-1.43303	-1.12812	-1.6213	-0.966006	-1.02012	-1.44639	-1.49683	-1.24333	-1.31853	-0.963501	-1.58125	-1.35442	-1.43205	-1.51816	-0.58706	-1.45754	-1.70463	-1.67247	-1.24198	-1.60336	-1.28875	-1.30672	-1.23786	-1.34023	-1.37477	-1.40068	-1.28017	-1.29264	-1.40729	-0.915815	-0.828653	-1.54036	-1.19616	-1.54425	-1.06608	-1.34477	-1.21434	-0.989134	-1.47091	-1.30747	-1.50675	-1.22365
-1.08397	-1.52323	-1.40208	-1.49135	-1.46117	-0.963424	-0.881321	-1.42621	-1.43004	-1.1261	-1.59137	-0.972941	-1.0248	-1.43817	-1.48396	-1.24554	-1.30375	-0.959103	-1.57071	-1.3483	-1.42618	-1.51479	-0.575667	-1.45023	-1.6901	-1.64898	-1.21513	-1.59233	-1.29793	-1.29624	-1.24433	-1.32702	-1.36973	-1.38617	-1.27183	-1.28159	-1.38571	-0.896629	-0.808748	-1.51754	-1.17253	-1.53787	-1.05066	-1.32349	-1.20438	-0.961965	-1.46054	-1.28561	-1.4883	-1.19121
-1.09117	-1.51559	-1.38446	-1.48429	-1.46581	-0.963269	-0.819256	-1.42553	-1.42213	-1.12557	-1.56034	-0.983524	-1.02699	-1.42813	-1.46772	-1.24684	-1.28594	-0.953374	-1.55784	-1.3423	-1.41984	-1.50865	-0.568024	-1.44142	-1.67701	-1.62077	-1.18624	-1.57912	-1.30632	-1.28375	-1.24945	-1.31265	-1.36481	-1.36949	-1.26392	-1.26868	-1.36163	-0.878917	-0.793705	-1.49519	-1.14656	-1.52939	-1.03566	-1.30235	-1.19356	-0.937294	-1.44826	-1.26444	-1.46656	-1.15823
-1.09792	-1.50326	-1.36611	-1.47785	-1.4672	-0.961735	-0.75938	-1.42158	-1.41332	-1.12582	-1.52838	-0.995867	-1.02706	-1.41612	-1.44955	-1.24683	-1.26542	-0.94554	-1.54214	-1.33653	-1.41213	-1.50087	-0.563697	-1.43109	-1.66491	-1.58995	-1.15617	-1.56329	-1.3128	-1.26979	-1.25224	-1.2969	-1.35954	-1.35145	-1.2559	-1.25442	-1.3344	-0.861968	-0.782862	-1.47232	-1.11994	-1.51802	-1.02121	-1.28089	-1.18176	-0.91559	-1.43384	-1.24394	-1.44239	-1.12356
-1.10377	-1.48705	-1.34796	-1.47058	-1.46582	-0.959923	-0.703018	-1.41518	-1.40916	-1.12539	-1.49438	-1.00772	-1.02558	-1.40228	-1.4317	-1.24548	-1.24351	-0.93561	-1.52348	-1.33023	-1.40235	-1.49118	-0.561594	-1.41944	-1.65308	-1.55764	-1.12559	-1.54477	-1.31594	-1.25507	-1.25244	-1.27935	-1.35313	-1.33384	-1.24771	-1.23864	-1.30536	-0.844666	-0.772735	-1.44688	-1.09439	-1.50519	-1.00703	-1.25943	-1.16864	-0.896371	-1.41718	-1.22299	-1.41703	-1.08726
-1.10839	-1.46916	-1.32986	-1.45941	-1.46359	-0.958259	-0.650681	-1.40816	-1.41056	-1.12323	-1.4587	-1.01769	-1.02217	-1.38646	-1.41458	-1.24391	-1.22234	-0.924941	-1.50192	-1.32269	-1.39039	-1.47874	-0.560029	-1.4063	-1.64018	-1.52443	-1.09457	-1.52367	-1.31641	-1.24044	-1.25138	-1.25954	-1.34413	-1.31697	-1.23863	-1.2209	-1.2752	-0.825973	-0.760135	-1.41721	-1.07048	-1.49182	-0.992018	-1.23668	-1.15385	-0.880401	-1.39821	-1.20144	-1.39114	-1.05017
-1.11196	-1.45099	-1.31105	-1.44296	-1.46066	-0.956787	-0.60206	-1.40064	-1.41571	-1.11844	-1.42178	-1.0264	-1.01617	-1.36787	-1.3976	-1.24208	-1.20256	-0.914986	-1.47761	-1.31323	-1.3774	-1.4631	-0.557919	-1.39059	-1.62378	-1.491	-1.06343	-1.50038	-1.3147	-1.22607	-1.24954	-1.23736	-1.33213	-1.3003	-1.2276	-1.20105	-1.24433	-0.805686	-0.743102	-1.38279	-1.04694	-1.47848	-0.975624	-1.21043	-1.13726	-0.868536	-1.37745	-1.1795	-1.36435	-1.01352
-1.1158	-1.43347	-1.29088	-1.42111	-1.45635	-0.955522	-0.555954	-1.39196	-1.4221	-1.11037	-1.3841	-1.03568	-1.00728	-1.34719	-1.38006	-1.23928	-1.18398	-0.905946	-1.45216	-1.3011	-1.3657	-1.44404	-0.554472	-1.37196	-1.6028	-1.45688	-1.03233	-1.47691	-1.31131	-1.21089	-1.24705	-1.21301	-1.3171	-1.2832	-1.21389	-1.1791	-1.21325	-0.78503	-0.720478	-1.34446	-1.02304	-1.46568	-0.957768	-1.17909	-1.11898	-0.861092	-1.35456	-1.15745	-1.33757	-0.978434
-1.12141	-1.41706	-1.26895	-1.39471	-1.45016	-0.954067	-0.509629	-1.38156	-1.42706	-1.09897	-1.34618	-1.04601	-0.995556	-1.32485	-1.36109	-1.23491	-1.16614	-0.897398	-1.42592	-1.28682	-1.35531	-1.42156	-0.549122	-1.35034	-1.57617	-1.41919	-1.00126	-1.45375	-1.30693	-1.19426	-1.24408	-1.18703	-1.29937	-1.26491	-1.19744	-1.15499	-1.18162	-0.765424	-0.692194	-1.30431	-0.997749	-1.45295	-0.938641	-1.14236	-1.09957	-0.857719	-1.3289	-1.13556	-1.3116	-0.945041
-1.12822	-1.40105	-1.24552	-1.36532	-1.44149	-0.95123	-0.4603	-1.36887	-1.42789	-1.08486	-1.308	-1.05725	-0.981705	-1.30114	-1.33971	-1.22848	-1.14814	-0.888838	-1.39858	-1.27028	-1.34493	-1.39748	-0.542317	-1.32596	-1.54315	-1.377	-0.970127	-1.43045	-1.30157	-1.17487	-1.24026	-1.16073	-1.2797	-1.24436	-1.17945	-1.13001	-1.14713	-0.747702	-0.659679	-1.26378	-0.969829	-1.43795	-0.918615	-1.10161	-1.08023	-0.85747	-1.30025	-1.11381	-1.28691	-0.911438
-1.13456	-1.3831	-1.22222	-1.33408	-1.42957	-0.946443	-0.408023	-1.35313	-1.42352	-1.06965	-1.26832	-1.0691	-0.967756	-1.27654	-1.31699	-1.21955	-1.12831	-0.879717	-1.36993	-1.25126	-1.33325	-1.37251	-0.536434	-1.29946	-1.50406	-1.33082	-0.938749	-1.40654	-1.29383	-1.1512	-1.23426	-1.13462	-1.2586	-1.22144	-1.16212	-1.105	-1.10787	-0.732339	-0.62673	-1.22416	-0.93851	-1.41905	-0.897985	-1.05934	-1.06098	-0.858871	-1.26867	-1.09166	-1.26381	-0.875519
-1.13881	-1.36262	-1.19931	-1.30064	-1.41554	-0.939309	-0.354577	-1.33532	-1.41291	-1.05547	-1.22651	-1.08088	-0.954214	-1.25098	-1.29298	-1.20866	-1.10583	-0.869516	-1.33948	-1.22985	-1.31923	-1.34678	-0.533244	-1.27133	-1.45982	-1.28199	-0.906602	-1.38121	-1.28309	-1.12238	-1.22547	-1.10877	-1.23604	-1.19601	-1.14601	-1.08055	-1.06344	-0.719368	-0.597729	-1.18639	-0.903976	-1.39538	-0.876778	-1.01753	-1.0412	-0.859894	-1.23451	-1.06877	-1.24186	-0.836807
-1.14024	-1.33864	-1.17631	-1.26494	-1.39935	-0.929627	-0.302085	-1.31578	-1.39554	-1.04285	-1.18255	-1.09121	-0.940742	-1.22311	-1.26729	-1.19553	-1.08036	-0.858441	-1.3059	-1.20603	-1.30228	-1.32045	-0.532742	-1.24178	-1.41184	-1.23222	-0.87346	-1.35296	-1.26832	-1.08873	-1.21281	-1.08313	-1.2129	-1.1681	-1.13077	-1.05706	-1.01451	-0.708177	-0.574035	-1.15002	-0.86766	-1.36668	-0.855118	-0.977935	-1.02037	-0.858821	-1.19938	-1.04474	-1.21953	-0.795765
-1.14014	-1.31018	-1.15268	-1.22702	-1.38042	-0.91755	-0.252114	-1.2946	-1.37192	-1.03136	-1.13679	-1.09906	-0.926979	-1.19258	-1.23975	-1.17965	-1.05203	-0.846425	-1.26913	-1.17915	-1.28318	-1.29298	-0.533944	-1.21224	-1.36278	-1.18226	-0.839759	-1.32155	-1.24849	-1.05221	-1.19519	-1.05725	-1.18911	-1.1381	-1.11581	-1.03414	-0.962409	-0.697369	-0.555017	-1.11228	-0.831709	-1.33346	-0.832961	-0.941753	-0.99802	-0.854224	-1.16403	-1.01917	-1.19617	-0.753234
-1.14152	-1.27725	-1.12776	-1.18702	-1.35853	-0.903453	-0.205149	-1.27202	-1.34306	-1.02027	-1.08985	-1.10284	-0.912181	-1.15941	-1.21005	-1.16087	-1.02143	-0.833328	-1.22932	-1.14914	-1.26164	-1.26229	-0.535597	-1.18315	-1.31348	-1.13066	-0.806325	-1.28669	-1.22336	-1.01593	-1.17236	-1.02982	-1.16408	-1.10631	-1.10021	-1.01	-0.908434	-0.685549	-0.539065	-1.07123	-0.797616	-1.29676	-0.810195	-0.908343	-0.973863	-0.845253	-1.12874	-0.991925	-1.17145	-0.710262
-1.14433	-1.24052	-1.10043	-1.14538	-1.33342	-0.887897	-0.160375	-1.24787	-1.31	-1.0086	-1.04218	-1.101	-0.89473	-1.12393	-1.17725	-1.13921	-0.989162	-0.819172	-1.18687	-1.1161	-1.23702	-1.22733	-0.536799	-1.15429	-1.26385	-1.07624	-0.77395	-1.24828	-1.1935	-0.981451	-1.14483	-1.00026	-1.13739	-1.07263	-1.08251	-0.983508	-0.853138	-0.671572	-0.523927	-1.02564	-0.766419	-1.25828	-0.786793	-0.874002	-0.948705	-0.832632	-1.09372	-0.963212	-1.14519	-0.668184
-1.14677	-1.20105	-1.07033	-1.10238	-1.3042	-0.871917	-0.117296	-1.22089	-1.27424	-0.995034	-0.993812	-1.0928	-0.874083	-1.08678	-1.14123	-1.11472	-0.955691	-0.803901	-1.14257	-1.08044	-1.20909	-1.18779	-0.537757	-1.1254	-1.2137	-1.01899	-0.742878	-1.20676	-1.16054	-0.949483	-1.11414	-0.968462	-1.10871	-1.03754	-1.06216	-0.953965	-0.797148	-0.654555	-0.506359	-0.974818	-0.738533	-1.22102	-0.762795	-0.835475	-0.922679	-0.820069	-1.05848	-0.934	-1.11741	-0.628316
-1.14713	-1.16115	-1.03688	-1.05804	-1.27123	-0.855742	-0.0753124	-1.19077	-1.23571	-0.979266	-0.945274	-1.07887	-0.850125	-1.04835	-1.10146	-1.08861	-0.92185	-0.7871	-1.09683	-1.04296	-1.17775	-1.14398	-0.539674	-1.09589	-1.16214	-0.959566	-0.712472	-1.16259	-1.12797	-0.920206	-1.08328	-0.93467	-1.0776	-1.00106	-1.03853	-0.921051	-0.741657	-0.634192	-0.483665	-0.919062	-0.713116	-1.18592	-0.738485	-0.791266	-0.895603	-0.811406	-1.02101	-0.906015	-1.08833	-0.591396
-1.14401	-1.12202	-0.99965	-1.01402	-1.23462	-0.839213	-0.0336327	-1.15714	-1.19385	-0.961146	-0.896947	-1.06187	-0.823149	-1.00836	-1.05745	-1.06112	-0.88768	-0.768554	-1.0489	-1.00414	-1.14266	-1.09689	-0.542425	-1.06463	-1.1066	-0.898949	-0.682103	-1.11579	-1.09728	-0.892467	-1.05354	-0.899454	-1.04476	-0.963042	-1.01117	-0.885042	-0.688069	-0.611112	-0.455126	-0.859484	-0.68736	-1.15263	-0.71493	-0.741096	-0.867421	-0.806894	-0.979977	-0.87953	-1.05849	-0.5576
-1.13649	-1.08403	-0.958771	-0.971624	-1.1946	-0.822213	0.00785577	-1.11979	-1.14852	-0.940769	-0.849033	-1.04568	-0.793865	-0.967354	-1.00928	-1.03209	-0.852789	-0.748066	-0.998758	-0.963688	-1.10431	-1.04743	-0.545152	-1.03181	-1.04597	-0.837933	-0.65138	-1.06715	-1.06869	-0.862608	-1.02521	-0.863279	-1.01091	-0.923566	-0.980277	-0.846612	-0.637507	-0.587445	-0.421592	-0.797828	-0.658636	-1.12041	-0.692383	-0.685856	-0.837891	-0.804752	-0.935235	-0.853923	-1.02862	-0.526621
-1.12496	-1.04704	-0.914702	-0.931741	-1.15185	-0.804455	0.047998	-1.07907	-1.09959	-0.918629	-0.801658	-1.03144	-0.762795	-0.925658	-0.957368	-1.00157	-0.816854	-0.725602	-0.946666	-0.922408	-1.06266	-0.995827	-0.546985	-0.99743	-0.98095	-0.776899	-0.619964	-1.01701	-1.04196	-0.827559	-0.998218	-0.826265	-0.976833	-0.882619	-0.946353	-0.806814	-0.589901	-0.565644	-0.384867	-0.736404	-0.625722	-1.08795	-0.670548	-0.627309	-0.806177	-0.802786	-0.887441	-0.828418	-0.998436	-0.497696
-1.10868	-1.01002	-0.867967	-0.894856	-1.1067	-0.7854	0.0861781	-1.03545	-1.04631	-0.895142	-0.754606	-1.01887	-0.729668	-0.883464	-0.902203	-0.969317	-0.779568	-0.701373	-0.893086	-0.880987	-1.01771	-0.943089	-0.54725	-0.961473	-0.913466	-0.717217	-0.587648	-0.965524	-1.01569	-0.786602	-0.971415	-0.788965	-0.943275	-0.839782	-0.91023	-0.767296	-0.543174	-0.546354	-0.34677	-0.676812	-0.588378	-1.05287	-0.649013	-0.568083	-0.771888	-0.799149	-0.837728	-0.80219	-0.967142	-0.469557
-1.08678	-0.970533	-0.819658	-0.860245	-1.0584	-0.765732	0.121297	-0.989277	-0.990134	-0.870528	-0.707031	-1.00734	-0.694468	-0.841034	-0.84542	-0.934468	-0.740482	-0.675697	-0.838692	-0.839952	-0.969901	-0.890055	-0.54544	-0.924112	-0.845833	-0.659957	-0.554588	-0.913025	-0.986225	-0.740589	-0.941564	-0.751468	-0.910176	-0.795562	-0.873595	-0.728772	-0.495836	-0.529127	-0.308748	-0.620087	-0.547236	-1.01428	-0.627236	-0.511218	-0.734834	-0.792794	-0.787006	-0.774322	-0.934097	-0.441162
-1.05916	-0.926751	-0.770437	-0.825128	-1.00745	-0.745765	0.152092	-0.942203	-0.933115	-0.845754	-0.658519	-0.995415	-0.657304	-0.798285	-0.788056	-0.89764	-0.700067	-0.648997	-0.783747	-0.799771	-0.919537	-0.837414	-0.540975	-0.885361	-0.779151	-0.605702	-0.521669	-0.859433	-0.950992	-0.691238	-0.906383	-0.713568	-0.876276	-0.750639	-0.836825	-0.691358	-0.448422	-0.513059	-0.271987	-0.566566	-0.503693	-0.972158	-0.604492	-0.458508	-0.695135	-0.78416	-0.735355	-0.744551	-0.899071	-0.412359
-1.02613	-0.877823	-0.720831	-0.78713	-0.954548	-0.725542	0.17795	-0.895085	-0.877564	-0.820463	-0.60918	-0.980341	-0.618477	-0.754545	-0.730879	-0.859093	-0.659013	-0.622421	-0.72748	-0.760218	-0.866288	-0.785727	-0.533063	-0.844754	-0.711884	-0.554561	-0.490026	-0.803558	-0.909409	-0.640336	-0.865521	-0.675089	-0.841222	-0.705782	-0.799602	-0.654871	-0.402309	-0.496964	-0.236455	-0.515306	-0.459998	-0.927108	-0.580477	-0.410682	-0.653299	-0.773293	-0.682987	-0.712693	-0.862716	-0.383431
-0.988122	-0.823882	-0.67138	-0.745206	-0.900532	-0.705118	0.199234	-0.848277	-0.825482	-0.793556	-0.559403	-0.961543	-0.578536	-0.710191	-0.674608	-0.818932	-0.61815	-0.596368	-0.669832	-0.719795	-0.811283	-0.734731	-0.521145	-0.802261	-0.642459	-0.505783	-0.459963	-0.745079	-0.862316	-0.589292	-0.819986	-0.635814	-0.804289	-0.661707	-0.761582	-0.61861	-0.358693	-0.479208	-0.201273	-0.463146	-0.418319	-0.880163	-0.554792	-0.367427	-0.609808	-0.76025	-0.630359	-0.678763	-0.827024	-0.354697
-0.946889	-0.766145	-0.621932	-0.699137	-0.846407	-0.6842	0.217709	-0.802014	-0.776695	-0.764118	-0.509641	-0.938803	-0.537824	-0.66542	-0.618906	-0.777479	-0.578248	-0.57077	-0.611492	-0.677756	-0.755361	-0.682619	-0.50524	-0.75755	-0.570724	-0.457237	-0.431248	-0.684745	-0.81147	-0.539335	-0.771598	-0.595349	-0.764571	-0.618391	-0.722149	-0.580838	-0.318032	-0.458678	-0.165397	-0.407096	-0.379718	-0.832025	-0.527099	-0.327174	-0.564778	-0.745379	-0.578015	-0.643079	-0.792324	-0.32649
-0.902968	-0.706107	-0.570876	-0.649361	-0.792318	-0.661756	0.236474	-0.755748	-0.726975	-0.731694	-0.46012	-0.912232	-0.496254	-0.620257	-0.561191	-0.734652	-0.539299	-0.545511	-0.55349	-0.634139	-0.699185	-0.628525	-0.485952	-0.710276	-0.497239	-0.40687	-0.403407	-0.623922	-0.758534	-0.491134	-0.721897	-0.553947	-0.721659	-0.574413	-0.679865	-0.540273	-0.279578	-0.43502	-0.12807	-0.346578	-0.344411	-0.782624	-0.497359	-0.28628	-0.518968	-0.728744	-0.52643	-0.605939	-0.757978	-0.299265
-0.856514	-0.644966	-0.517493	-0.596985	-0.736621	-0.637081	0.256869	-0.707321	-0.672355	-0.696536	-0.410579	-0.882518	-0.454971	-0.574773	-0.499729	-0.689256	-0.499891	-0.520169	-0.496776	-0.589374	-0.64343	-0.572834	-0.46457	-0.66048	-0.422853	-0.354053	-0.375839	-0.564033	-0.704605	-0.444847	-0.671616	-0.511988	-0.67575	-0.528668	-0.634253	-0.496852	-0.241472	-0.408556	-0.088625	-0.28259	-0.311919	-0.732227	-0.4658	-0.241057	-0.473011	-0.709581	-0.475623	-0.567364	-0.723264	-0.272724
-0.80802	-0.584564	-0.462266	-0.544031	-0.678726	-0.609731	0.279258	-0.655468	-0.611643	-0.660242	-0.360589	-0.850187	-0.414831	-0.528791	-0.434852	-0.640792	-0.458811	-0.493935	-0.441522	-0.544057	-0.587878	-0.516567	-0.443087	-0.608432	-0.348341	-0.298992	-0.347868	-0.505536	-0.651264	-0.400273	-0.621999	-0.469937	-0.627645	-0.480843	-0.585773	-0.451356	-0.202878	-0.380119	-0.0468321	-0.216907	-0.281106	-0.680251	-0.432897	-0.190757	-0.427436	-0.687141	-0.4249	-0.52754	-0.687287	-0.246103
-0.757331	-0.526254	-0.406332	-0.492475	-0.619052	-0.579574	0.303611	-0.600218	-0.545303	-0.623368	-0.309966	-0.815138	-0.376327	-0.481475	-0.368065	-0.589341	-0.415467	-0.467028	-0.386474	-0.498559	-0.530392	-0.460855	-0.422387	-0.554582	-0.273995	-0.242274	-0.319035	-0.44703	-0.598927	-0.356787	-0.573492	-0.428259	-0.578837	-0.431098	-0.535572	-0.404965	-0.163475	-0.350557	-0.0042345	-0.151288	-0.249675	-0.625711	-0.399304	-0.136581	-0.382685	-0.660385	-0.374322	-0.486365	-0.648701	-0.218437
-0.702513	-0.470737	-0.350945	-0.442835	-0.558503	-0.546906	0.328778	-0.542426	-0.47478	-0.586002	-0.258684	-0.777988	-0.339671	-0.432171	-0.301147	-0.535443	-0.369668	-0.439394	-0.330473	-0.452801	-0.469581	-0.406212	-0.402746	-0.500416	-0.200307	-0.184808	-0.288902	-0.387245	-0.5472	-0.313282	-0.525874	-0.386974	-0.53022	-0.37993	-0.485056	-0.358565	-0.123112	-0.320619	0.0365346	-0.0870823	-0.215218	-0.568028	-0.365151	-0.0805811	-0.338574	-0.62848	-0.324341	-0.443691	-0.60683	-0.188942
-0.643474	-0.417952	-0.296608	-0.394778	-0.498094	-0.512267	0.351689	-0.483362	-0.402065	-0.548263	-0.206825	-0.738217	-0.304306	-0.380739	-0.23512	-0.479979	-0.321643	-0.410804	-0.273337	-0.406842	-0.405546	-0.352063	-0.384256	-0.446717	-0.128786	-0.127796	-0.257143	-0.326012	-0.495525	-0.269755	-0.478713	-0.345275	-0.482355	-0.327933	-0.43487	-0.312437	-0.0824486	-0.291333	0.0731288	-0.0252753	-0.177628	-0.507196	-0.330374	-0.0248888	-0.293649	-0.591398	-0.275458	-0.39959	-0.561147	-0.157679
-0.581296	-0.366868	-0.242173	-0.347699	-0.438205	-0.476502	0.370606	-0.423891	-0.329699	-0.509721	-0.154612	-0.69486	-0.268157	-0.327448	-0.169217	-0.423509	-0.272002	-0.381147	-0.215372	-0.360521	-0.339269	-0.297874	-0.366259	-0.393815	-0.0612448	-0.0715552	-0.223706	-0.2637	-0.443156	-0.226898	-0.431328	-0.30251	-0.435533	-0.275648	-0.384203	-0.267046	-0.0439007	-0.262588	0.104999	0.0334885	-0.138286	-0.443708	-0.294983	0.0283605	-0.246897	-0.549887	-0.22802	-0.354181	-0.511494	-0.126321
-0.517744	-0.314864	-0.186192	-0.30075	-0.377865	-0.441259	0.384821	-0.363886	-0.260478	-0.468742	-0.102425	-0.64746	-0.229115	-0.272833	-0.10203	-0.365623	-0.221823	-0.350261	-0.157053	-0.313554	-0.272069	-0.243225	-0.346688	-0.341868	0.00116772	-0.0161617	-0.188862	-0.200885	-0.3888	-0.185621	-0.382382	-0.25835	-0.389276	-0.223779	-0.332752	-0.222442	-0.00980252	-0.233553	0.134647	0.0891414	-0.0989995	-0.379104	-0.258874	0.0775974	-0.198516	-0.505652	-0.181908	-0.307542	-0.458299	-0.097089
-0.454738	-0.259301	-0.128641	-0.253004	-0.316241	-0.407077	0.394369	-0.303399	-0.195981	-0.424506	-0.0507226	-0.596044	-0.186656	-0.217388	-0.0336788	-0.30636	-0.172551	-0.317685	-0.0988927	-0.265759	-0.204802	-0.187669	-0.324544	-0.290344	0.0587194	0.038439	-0.153327	-0.13814	-0.332317	-0.146617	-0.331309	-0.212679	-0.341776	-0.172909	-0.280293	-0.178274	0.0192625	-0.203388	0.165386	0.142262	-0.0612105	-0.314975	-0.221637	0.122701	-0.14936	-0.462112	-0.136197	-0.260681	-0.402203	-0.0706959
-0.392755	-0.199603	-0.0702464	-0.205042	-0.253395	-0.373802	0.400028	-0.242614	-0.13672	-0.376604	2.11765e-05	-0.541186	-0.141282	-0.161229	0.0349166	-0.246344	-0.124958	-0.283125	-0.0413664	-0.217142	-0.137105	-0.130901	-0.300041	-0.237228	0.113931	0.0924349	-0.11786	-0.0758809	-0.27478	-0.109822	-0.278998	-0.165636	-0.291737	-0.123439	-0.226558	-0.134076	0.0439782	-0.171526	0.198578	0.19373	-0.0257495	-0.252896	-0.183577	0.164795	-0.10041	-0.421091	-0.0896462	-0.214297	-0.34372	-0.0469043
-0.329163	-0.136686	-0.0118634	-0.157201	-0.18984	-0.341101	0.402843	-0.181704	-0.0822749	-0.325032	0.0494047	-0.485524	-0.0939602	-0.104519	0.102763	-0.186486	-0.0793257	-0.246296	0.015216	-0.168079	-0.0684584	-0.0730448	-0.274078	-0.18081	0.170076	0.145949	-0.0825168	-0.0145543	-0.217924	-0.0740198	-0.22716	-0.117559	-0.238691	-0.0755018	-0.171497	-0.0894536	0.0657095	-0.13751	0.234607	0.245103	0.00710985	-0.194007	-0.145085	0.205592	-0.0522296	-0.383339	-0.0416623	-0.168835	-0.283787	-0.0250228
-0.26151	-0.0722678	0.0457888	-0.109596	-0.126206	-0.308278	0.403834	-0.120845	-0.0311546	-0.270348	0.0972518	-0.430434	-0.0458171	-0.0477568	0.169112	-0.127678	-0.0355583	-0.20711	0.0704841	-0.119593	0.00076749	-0.0148789	-0.24776	-0.120949	0.228057	0.1989	-0.0470064	0.0451536	-0.163345	-0.0374821	-0.177412	-0.0689604	-0.182795	-0.0287536	-0.11522	-0.0439154	0.0858801	-0.101297	0.273294	0.298806	0.0376323	-0.137913	-0.106585	0.246409	-0.00449444	-0.348977	0.00795119	-0.124556	-0.222907	-0.00396516
-0.189757	-0.00804538	0.102301	-0.0622938	-0.0629551	-0.273978	0.404255	-0.06003	0.0197407	-0.213221	0.14379	-0.376529	0.00208786	0.00839811	0.23366	-0.0700987	0.00701417	-0.165806	0.124171	-0.072061	0.0697704	0.0426211	-0.221662	-0.0585213	0.287537	0.250956	-0.0110333	0.10261	-0.111385	0.00120484	-0.130274	-0.0205313	-0.124783	0.0179953	-0.0577188	0.00294541	0.105566	-0.0637784	0.313389	0.354553	0.0666885	-0.0815121	-0.0684912	0.287915	0.0434279	-0.316626	0.0591314	-0.0810806	-0.161435	0.0180765
-0.115244	0.0546829	0.157454	-0.014957	-0.000243761	-0.237729	0.404337	0.00121884	0.0731524	-0.153955	0.190016	-0.324152	0.0492257	0.0633754	0.296131	-0.0125275	0.0500981	-0.122784	0.176283	-0.0254179	0.137778	0.0988405	-0.195365	0.00517742	0.347825	0.301415	0.0256851	0.157574	-0.0603687	0.0432177	-0.0847219	0.0272028	-0.0655068	0.0659738	0.000702373	0.0505442	0.125882	-0.0264943	0.351942	0.410338	0.0954191	-0.0216858	-0.0307579	0.331001	0.0915804	-0.282201	0.111342	-0.0368065	-0.099786	0.0430955
-0.0397784	0.114745	0.210587	0.033735	0.0615889	-0.199525	0.403788	0.0629673	0.129402	-0.0933073	0.237328	-0.272398	0.0951202	0.117128	0.355531	0.0459639	0.095314	-0.0785258	0.227076	0.0205663	0.204451	0.153423	-0.168496	0.0691042	0.407625	0.34951	0.0635403	0.210358	-0.00844569	0.0891924	-0.0398175	0.0738619	-0.00554863	0.115249	0.0590417	0.0976787	0.147682	0.00908131	0.386438	0.464011	0.124427	0.0426009	0.00769982	0.374861	0.13974	-0.242402	0.163359	0.00968846	-0.037862	0.0719052
0.0352395	0.171484	0.261011	0.0855405	0.122145	-0.159689	0.402356	0.124502	0.187409	-0.0321116	0.285926	-0.217752	0.139413	0.170595	0.410836	0.104985	0.142892	-0.0341734	0.277224	0.0663759	0.270308	0.206296	-0.140537	0.133134	0.464551	0.394825	0.102514	0.262101	0.0457501	0.138456	0.00567777	0.119275	0.0543515	0.165211	0.115958	0.143227	0.17152	0.0425531	0.41526	0.514131	0.153187	0.111079	0.0480468	0.417547	0.187668	-0.196358	0.214266	0.0588426	0.025642	0.104383
0.109451	0.225002	0.308426	0.141476	0.181169	-0.118785	0.399677	0.184776	0.245719	0.0287327	0.335296	-0.157233	0.181992	0.224619	0.461654	0.163545	0.192184	0.00970945	0.327826	0.113033	0.33584	0.257877	-0.110902	0.197654	0.517407	0.437608	0.142228	0.314336	0.103317	0.188197	0.0532921	0.163722	0.113424	0.215088	0.170407	0.186792	0.197601	0.0753466	0.43763	0.560427	0.181053	0.182673	0.0904415	0.457243	0.23511	-0.1448	0.263563	0.110444	0.0911373	0.139791
0.182354	0.276137	0.353071	0.201856	0.238636	-0.0771781	0.395042	0.242951	0.302999	0.0884262	0.38477	-0.0901455	0.223081	0.278897	0.508398	0.220715	0.24222	0.0529304	0.378964	0.161588	0.400408	0.309575	-0.0792803	0.262211	0.565813	0.479445	0.182057	0.367481	0.164718	0.235471	0.104127	0.208338	0.171037	0.264245	0.222365	0.229102	0.225478	0.108937	0.453886	0.603949	0.207414	0.255805	0.134405	0.493211	0.281794	-0.0894053	0.311031	0.16387	0.157842	0.17698
0.252698	0.325954	0.395792	0.266323	0.29481	-0.0347229	0.389116	0.298945	0.358096	0.147044	0.433675	-0.0173745	0.263376	0.332589	0.552773	0.27612	0.292103	0.0954011	0.430141	0.212433	0.462952	0.363262	-0.045868	0.325956	0.610113	0.523198	0.221367	0.421327	0.229245	0.279162	0.158047	0.254326	0.226936	0.312298	0.273437	0.271129	0.253703	0.144041	0.465464	0.645131	0.231678	0.328477	0.179215	0.526469	0.327475	-0.0320302	0.356734	0.218335	0.224371	0.214485
0.31919	0.375791	0.437647	0.33379	0.350462	0.00859363	0.382926	0.353927	0.410957	0.206493	0.481474	0.059267	0.303279	0.384933	0.597823	0.33044	0.341213	0.137516	0.480805	0.265431	0.522708	0.419263	-0.0118616	0.388172	0.651324	0.5696	0.260008	0.475479	0.294676	0.319251	0.213123	0.301792	0.281506	0.359271	0.325375	0.313481	0.281543	0.181	0.475242	0.684422	0.253582	0.398915	0.2242	0.559263	0.371652	0.0256123	0.401086	0.27308	0.289378	0.251297
0.381157	0.42759	0.478974	0.402485	0.406669	0.0530643	0.37764	0.40949	0.462415	0.268316	0.52834	0.137953	0.342221	0.435608	0.644289	0.384968	0.38936	0.180544	0.53045	0.320092	0.57957	0.476928	0.0203436	0.448614	0.690396	0.618073	0.29886	0.529287	0.358793	0.356337	0.267226	0.350187	0.336339	0.405214	0.37885	0.356653	0.309385	0.219783	0.486733	0.722539	0.273397	0.465871	0.268938	0.592966	0.413836	0.081935	0.445073	0.327524	0.352515	0.286884
0.439008	0.48157	0.519851	0.470692	0.463542	0.099073	0.37427	0.466263	0.513916	0.332051	0.574063	0.217534	0.379267	0.485107	0.691622	0.439827	0.436494	0.225093	0.578666	0.375772	0.634675	0.535299	0.0499526	0.507816	0.72777	0.667684	0.339009	0.581698	0.41986	0.391728	0.319006	0.398772	0.393288	0.450322	0.433944	0.400942	0.338066	0.259816	0.501106	0.759591	0.291908	0.528689	0.313067	0.628556	0.453856	0.136427	0.489753	0.381144	0.415462	0.321017
0.494616	0.536683	0.560399	0.536937	0.520653	0.146766	0.372686	0.524352	0.566898	0.396168	0.618309	0.296939	0.413764	0.534615	0.739055	0.494562	0.482762	0.271094	0.625791	0.431879	0.690372	0.593402	0.0772566	0.566229	0.764373	0.717089	0.380677	0.632386	0.476552	0.42782	0.367602	0.446911	0.452432	0.494921	0.490359	0.446082	0.368329	0.299877	0.518107	0.794398	0.310145	0.587509	0.356105	0.666643	0.491938	0.189342	0.535046	0.433514	0.480394	0.353727
0.549907	0.591477	0.600429	0.599969	0.577522	0.196031	0.370512	0.583589	0.621722	0.459054	0.660973	0.375007	0.44568	0.584331	0.785353	0.548715	0.528456	0.318098	0.671866	0.48804	0.747011	0.650675	0.102972	0.623213	0.800266	0.764526	0.423566	0.681227	0.528396	0.466598	0.412823	0.494236	0.512733	0.539184	0.547348	0.491035	0.400404	0.338771	0.536911	0.826641	0.329537	0.643333	0.397619	0.706539	0.528903	0.241254	0.58026	0.484436	0.547604	0.38543
0.605317	0.644724	0.639132	0.659048	0.633694	0.246516	0.365121	0.643334	0.676889	0.519861	0.702082	0.450698	0.47603	0.63396	0.828421	0.601769	0.573802	0.365507	0.716865	0.543782	0.803859	0.707701	0.128278	0.677762	0.835038	0.809603	0.467168	0.728331	0.576333	0.508542	0.455537	0.540757	0.57283	0.583017	0.603693	0.535049	0.433598	0.375398	0.555961	0.855528	0.351697	0.698605	0.437411	0.745519	0.56616	0.292961	0.624696	0.534142	0.616336	0.417252
0.660631	0.695548	0.676627	0.714737	0.688864	0.297201	0.355721	0.70231	0.730575	0.579267	0.741816	0.523392	0.506919	0.683197	0.867764	0.652981	0.619044	0.413008	0.760919	0.598599	0.860095	0.763864	0.155238	0.729213	0.868386	0.851459	0.510915	0.774103	0.623761	0.553163	0.498315	0.586345	0.631634	0.62659	0.65864	0.577265	0.466275	0.408875	0.572371	0.880138	0.377746	0.756224	0.475681	0.781487	0.60419	0.345648	0.667906	0.583706	0.685558	0.449972
0.715562	0.743525	0.713302	0.770016	0.743577	0.347241	0.342667	0.759733	0.781321	0.638676	0.780817	0.593497	0.539224	0.731588	0.903184	0.702049	0.664649	0.461216	0.804042	0.652155	0.914746	0.817961	0.185796	0.77754	0.900017	0.88917	0.554317	0.818888	0.674868	0.599505	0.544102	0.630906	0.68863	0.669539	0.711371	0.616864	0.497651	0.438922	0.584537	0.900204	0.407411	0.816436	0.513305	0.812809	0.642939	0.399477	0.71002	0.634213	0.754224	0.482924
0.769543	0.788783	0.749675	0.827964	0.797868	0.395948	0.326906	0.814901	0.827954	0.698148	0.818854	0.663444	0.573092	0.778338	0.934861	0.748696	0.709956	0.511285	0.846052	0.704549	0.966631	0.869116	0.220796	0.82368	0.929604	0.922427	0.597037	0.862958	0.730596	0.646539	0.594064	0.674512	0.743705	0.711228	0.761213	0.653513	0.527454	0.466133	0.592597	0.916092	0.438093	0.877897	0.551249	0.838288	0.682188	0.45347	0.752211	0.685313	0.821437	0.514721
0.821643	0.83213	0.786309	0.888347	0.851507	0.442895	0.309774	0.867289	0.870009	0.757141	0.85532	0.7355	0.608385	0.823144	0.963539	0.792856	0.753702	0.563204	0.887423	0.756808	1.01595	0.917071	0.260163	0.869556	0.958411	0.95155	0.638471	0.90727	0.789864	0.693585	0.648116	0.717284	0.796605	0.751212	0.80806	0.687587	0.555681	0.492306	0.597863	0.928778	0.466897	0.938908	0.589396	0.857721	0.72137	0.50609	0.794765	0.735898	0.886769	0.544146
0.872497	0.8748	0.823241	0.949158	0.904346	0.488433	0.293057	0.916859	0.908269	0.815147	0.889822	0.808818	0.644238	0.865699	0.989807	0.834826	0.794873	0.616214	0.92786	0.810124	1.06222	0.962516	0.303091	0.915865	0.98735	0.977578	0.677995	0.951609	0.850817	0.74105	0.705327	0.759535	0.847308	0.789414	0.852397	0.720582	0.582999	0.519488	0.602136	0.940519	0.492993	0.99797	0.627102	0.872158	0.759316	0.55601	0.837459	0.784913	0.949329	0.570802
0.92242	0.917574	0.85946	1.00827	0.95618	0.534385	0.278546	0.964075	0.945718	0.871659	0.9222	0.880956	0.678486	0.905858	1.01341	0.874978	0.833181	0.669408	0.96669	0.864124	1.10477	1.00679	0.348381	0.962685	1.01708	1.00215	0.715297	0.995063	0.911317	0.789034	0.764122	0.802035	0.896202	0.826299	0.895621	0.754734	0.611451	0.548586	0.606579	0.952671	0.5167	1.05396	0.663783	0.884554	0.795478	0.603027	0.880028	0.831828	1.00824	0.595559
0.971582	0.960593	0.894179	1.06429	1.00666	0.582685	0.267299	1.01026	0.986608	0.926119	0.952524	0.949617	0.709487	0.943829	1.03445	0.913642	0.869505	0.722051	1.00347	0.917604	1.14346	1.04953	0.394643	1.00997	1.0481	1.02516	0.750575	1.03682	0.968968	0.837403	0.822265	0.84442	0.943728	0.863001	0.93993	0.790682	0.643272	0.579785	0.611027	0.96611	0.538815	1.107	0.699071	0.898946	0.829642	0.648834	0.921968	0.87711	1.06321	0.620008
1.0203	1.00502	0.927142	1.11752	1.05587	0.633817	0.259724	1.05749	1.03252	0.978495	0.981792	1.0137	0.736532	0.979947	1.05291	0.951801	0.905632	0.773959	1.03806	0.969414	1.1785	1.08969	0.440683	1.05706	1.08001	1.04577	0.784898	1.0764	1.0224	0.885986	0.877947	0.885722	0.990481	0.900017	0.985768	0.828091	0.679247	0.612783	0.615238	0.981422	0.560615	1.15732	0.732922	0.916517	0.861884	0.695861	0.96231	0.922194	1.11461	0.645147
1.06842	1.05053	0.958433	1.1705	1.10344	0.687345	0.255632	1.10603	1.08328	1.02816	1.01048	1.07418	0.759638	1.01459	1.06887	0.989704	0.942266	0.825307	1.07065	1.01896	1.21021	1.12653	0.485835	1.10221	1.11082	1.06347	0.819749	1.11392	1.0708	0.934484	0.930019	0.925129	1.03799	0.937512	1.03249	0.866271	0.719121	0.646659	0.618523	0.997901	0.584383	1.20546	0.766051	0.93676	0.892598	0.745559	1.00048	0.967412	1.16383	0.671696
1.11489	1.09567	0.988378	1.22339	1.14886	0.742397	0.254109	1.15503	1.13783	1.07438	1.03881	1.13376	0.779441	1.04878	1.08276	1.02721	0.979557	0.875321	1.10239	1.06673	1.23993	1.15972	0.529749	1.14466	1.13922	1.07791	0.855225	1.15073	1.1141	0.982459	0.977996	0.962268	1.08606	0.97552	1.07916	0.90417	0.762013	0.679495	0.619884	1.01247	0.612307	1.25233	0.798838	0.95859	0.922193	0.798789	1.03587	1.01256	1.21304	0.700087
1.1595	1.13892	1.01741	1.27518	1.19197	0.797955	0.253256	1.20348	1.19408	1.11699	1.06706	1.19341	0.796902	1.08279	1.09489	1.06422	1.01747	0.922866	1.13367	1.11433	1.26779	1.18925	0.572328	1.18407	1.16427	1.08858	0.890693	1.18711	1.15315	1.02928	1.02221	0.997378	1.13345	1.01364	1.1247	0.940208	0.806668	0.709696	0.618612	1.02305	0.64478	1.29837	0.831513	0.98022	0.951087	0.855784	1.06804	1.0574	1.2625	0.729821
1.20161	1.17943	1.04628	1.32496	1.23286	0.853007	0.251555	1.25041	1.24886	1.15624	1.09497	1.25326	0.813111	1.11644	1.10517	1.10042	1.05536	0.967147	1.16454	1.16196	1.29343	1.21641	0.614017	1.22041	1.18529	1.09665	0.92547	1.22286	1.18912	1.07377	1.06375	1.03147	1.17893	1.05087	1.16787	0.973571	0.851789	0.736862	0.614724	1.02918	0.680864	1.3433	0.864284	0.998904	0.98022	0.91555	1.09703	1.10142	1.31148	0.758686
1.24043	1.21731	1.07647	1.37172	1.27216	0.90687	0.248852	1.29493	1.30045	1.19304	1.12134	1.3133	0.829223	1.14961	1.11499	1.13527	1.09168	1.00811	1.19505	1.2091	1.31675	1.24185	0.656413	1.2541	1.20226	1.10323	0.958938	1.25781	1.22356	1.11464	1.10499	1.06494	1.22169	1.08688	1.20835	1.00375	0.896755	0.761461	0.609447	1.03141	0.718997	1.38791	0.896954	1.01383	1.00953	0.97531	1.12331	1.14368	1.35927	0.784451
1.27556	1.25332	1.10825	1.41371	1.31158	0.958939	0.245682	1.33743	1.34725	1.22954	1.14558	1.37266	0.845721	1.18196	1.12557	1.16948	1.1256	1.04685	1.22488	1.25528	1.33752	1.26606	0.700703	1.28568	1.21585	1.10949	0.990552	1.29154	1.25899	1.15113	1.14894	1.09796	1.26149	1.12117	1.24585	1.03062	0.94055	0.784489	0.605281	1.03095	0.757758	1.43125	0.928577	1.0245	1.03838	1.03255	1.14792	1.18398	1.40506	0.806241
1.3072	1.28782	1.14104	1.44984	1.35149	1.00881	0.242692	1.37782	1.38798	1.26635	1.16748	1.42886	0.862725	1.2129	1.1379	1.20322	1.15637	1.08505	1.253	1.29992	1.35493	1.2897	0.746108	1.31558	1.22787	1.11659	1.02062	1.32322	1.29524	1.18359	1.19577	1.1307	1.29911	1.1532	1.28037	1.05468	0.981991	0.806969	0.603726	1.02899	0.796372	1.4714	0.95852	1.03084	1.06617	1.08562	1.17279	1.22166	1.44808	0.82413
1.33631	1.3212	1.17411	1.47916	1.39148	1.05647	0.240473	1.41598	1.42241	1.30325	1.18709	1.48037	0.880224	1.24302	1.15266	1.23632	1.18339	1.12274	1.27923	1.34227	1.36981	1.3126	0.790795	1.34485	1.24118	1.12441	1.04924	1.35311	1.33056	1.21429	1.24387	1.16293	1.33485	1.18279	1.31244	1.0766	1.02028	0.829963	0.605583	1.02622	0.834513	1.50693	0.9863	1.03348	1.09245	1.13354	1.19843	1.25603	1.48956	0.838875
1.36491	1.35407	1.20669	1.50141	1.4311	1.10234	0.239429	1.45214	1.45147	1.33994	1.20483	1.52579	0.897853	1.27245	1.16933	1.2687	1.20674	1.15926	1.30332	1.38263	1.38294	1.33288	0.833033	1.37363	1.25642	1.13008	1.07648	1.38066	1.36326	1.24667	1.29126	1.19374	1.36897	1.21017	1.34263	1.09722	1.05555	0.854898	0.611039	1.02337	0.871857	1.53742	1.01164	1.03314	1.11699	1.17622	1.22448	1.28687	1.52965	0.851695
1.39346	1.38656	1.23829	1.51734	1.46967	1.14759	0.238779	1.48641	1.47801	1.37565	1.22116	1.56416	0.914714	1.30104	1.18531	1.30008	1.22698	1.19408	1.32503	1.42034	1.39508	1.34965	0.872127	1.40156	1.27289	1.13101	1.10263	1.405	1.39209	1.28162	1.33631	1.22299	1.40195	1.23616	1.37154	1.11805	1.08961	0.881882	0.619017	1.02087	0.908206	1.56398	1.03468	1.03003	1.14045	1.21484	1.25049	1.31447	1.56797	0.864353
1.42159	1.41854	1.26953	1.5281	1.50617	1.19374	0.237829	1.51876	1.50594	1.40866	1.23644	1.59567	0.931027	1.32879	1.19867	1.32981	1.24534	1.22673	1.34454	1.45442	1.40715	1.36292	0.909081	1.42838	1.28964	1.12686	1.12775	1.42575	1.41607	1.31852	1.37793	1.25021	1.43385	1.26248	1.40098	1.13925	1.12432	0.910049	0.626465	1.01892	0.943541	1.58961	1.05585	1.02447	1.16316	1.25273	1.27569	1.33978	1.60442	0.878856
1.44898	1.45158	1.30014	1.53494	1.54099	1.2406	0.235981	1.55021	1.53507	1.43866	1.25178	1.62147	0.947298	1.35549	1.2086	1.35797	1.26398	1.25681	1.3621	1.48446	1.4191	1.37325	0.945629	1.45377	1.30542	1.11872	1.15145	1.44298	1.43555	1.35642	1.41632	1.2749	1.46405	1.28932	1.43092	1.16019	1.15907	0.938247	0.630683	1.01758	0.978067	1.61545	1.07602	1.01625	1.18537	1.29397	1.29876	1.36493	1.63862	0.896118
1.47503	1.48488	1.32933	1.54063	1.57383	1.28706	0.232798	1.58035	1.563	1.46553	1.26755	1.64385	0.964092	1.38062	1.21505	1.38415	1.28353	1.28537	1.37802	1.51056	1.4289	1.38165	0.982687	1.47737	1.31848	1.10833	1.17389	1.45722	1.45178	1.39385	1.45172	1.29696	1.49319	1.31605	1.46013	1.18019	1.1921	0.96554	0.630122	1.0166	1.01264	1.64174	1.09693	1.00502	1.20736	1.33922	1.31964	1.3904	1.66973	0.916241
1.4986	1.5162	1.35649	1.54658	1.6041	1.33203	0.22857	1.60803	1.58737	1.48944	1.28364	1.66699	0.981912	1.40437	1.21848	1.40776	1.30371	1.31264	1.39355	1.53351	1.4353	1.38882	1.02083	1.50035	1.32858	1.09722	1.19481	1.4703	1.46685	1.42869	1.48474	1.31661	1.52073	1.34197	1.48743	1.19857	1.22187	0.991309	0.624077	1.01534	1.04815	1.66851	1.11908	0.990788	1.22903	1.38714	1.33836	1.41571	1.6983	0.938791
1.52033	1.5436	1.38135	1.55344	1.63162	1.37479	0.224947	1.63246	1.60649	1.51098	1.29983	1.69229	1.00066	1.42641	1.21982	1.42861	1.32399	1.33852	1.40898	1.55561	1.43812	1.39448	1.0604	1.52313	1.33561	1.08614	1.21384	1.48269	1.48297	1.46058	1.5164	1.3343	1.54554	1.36635	1.5119	1.2144	1.24766	1.01527	0.61278	1.01424	1.08351	1.69476	1.14226	0.973752	1.24965	1.43582	1.35506	1.44035	1.72372	0.962758
1.54036	1.56616	1.40393	1.56165	1.65637	1.41529	0.223783	1.65328	1.61952	1.5306	1.31565	1.71954	1.01915	1.44626	1.22073	1.44681	1.34345	1.36307	1.42406	1.5773	1.43785	1.3989	1.10086	1.54568	1.33973	1.07603	1.23087	1.49426	1.50073	1.48886	1.54717	1.35131	1.5669	1.38843	1.53284	1.22762	1.27	1.03768	0.597566	1.01389	1.11662	1.71772	1.16598	0.953995	1.26919	1.48328	1.37021	1.4635	1.74487	0.986318
1.55857	1.58415	1.42474	1.57038	1.6786	1.45466	0.226117	1.67062	1.62828	1.54819	1.33035	1.74802	1.03609	1.46374	1.22316	1.46291	1.36041	1.38602	1.4385	1.59808	1.43547	1.40262	1.14021	1.568	1.34154	1.06803	1.24597	1.50487	1.5179	1.51289	1.57652	1.36826	1.58459	1.40859	1.55074	1.23877	1.29079	1.05929	0.581437	1.01483	1.14575	1.73611	1.18947	0.933003	1.28709	1.52804	1.38403	1.48383	1.76128	1.00823
1.5751	1.59871	1.44337	1.57633	1.69972	1.4933	0.23236	1.68614	1.63376	1.56437	1.34434	1.776	1.05074	1.47891	1.22741	1.47858	1.37427	1.40615	1.45183	1.6175	1.43181	1.40624	1.17664	1.58963	1.34144	1.06305	1.25926	1.51398	1.53293	1.53266	1.60473	1.38542	1.59891	1.42675	1.56598	1.24886	1.31089	1.08101	0.567757	1.01745	1.17038	1.74886	1.21144	0.912373	1.30258	1.57104	1.39618	1.50162	1.77296	1.02834
1.58974	1.61037	1.45916	1.57823	1.71957	1.53129	0.242291	1.70055	1.6369	1.57914	1.35753	1.79999	1.06279	1.49212	1.23273	1.49422	1.38499	1.42307	1.46318	1.6348	1.42729	1.41038	1.20907	1.60943	1.33915	1.06151	1.27167	1.52004	1.54467	1.54856	1.63096	1.40287	1.61151	1.44266	1.57912	1.25908	1.33075	1.1033	0.557319	1.02147	1.19178	1.75531	1.2315	0.89372	1.3153	1.61185	1.4068	1.51676	1.78052	1.04713
1.6013	1.61969	1.47186	1.57651	1.73723	1.56876	0.254933	1.71412	1.6389	1.59215	1.36955	1.81865	1.07228	1.50478	1.23817	1.5095	1.39299	1.43669	1.47285	1.64852	1.42317	1.41509	1.23705	1.62719	1.33465	1.0629	1.28383	1.52284	1.55212	1.56105	1.65379	1.42018	1.62311	1.45645	1.59101	1.26982	1.35082	1.12607	0.54938	1.02561	1.21214	1.75586	1.24936	0.878353	1.32534	1.64945	1.4156	1.5291	1.7865	1.06537
1.60913	1.62746	1.48157	1.57255	1.75206	1.60545	0.268152	1.72714	1.63967	1.6033	1.38019	1.8317	1.07984	1.51724	1.24282	1.52414	1.39915	1.44726	1.48084	1.65901	1.42006	1.41957	1.26091	1.6423	1.32759	1.06547	1.2962	1.5224	1.55509	1.57094	1.67226	1.43595	1.63401	1.46818	1.60196	1.28006	1.37062	1.14954	0.542692	1.0285	1.23263	1.75151	1.2649	0.865912	1.33332	1.68331	1.42216	1.53893	1.79158	1.08372
1.61307	1.6338	1.48866	1.56802	1.76362	1.64048	0.279302	1.73924	1.63614	1.61248	1.3893	1.83976	1.08691	1.52929	1.24598	1.53753	1.4041	1.45548	1.48707	1.6663	1.41802	1.42401	1.28167	1.65408	1.31764	1.06809	1.30916	1.51904	1.55426	1.57815	1.68628	1.44963	1.6445	1.47761	1.61122	1.28921	1.38768	1.17302	0.535694	1.02924	1.25404	1.74382	1.27841	0.852982	1.34069	1.71321	1.42639	1.54639	1.79556	1.10279
1.61348	1.63778	1.49473	1.56375	1.7717	1.674	0.287328	1.74863	1.62596	1.61947	1.39685	1.84426	1.09524	1.54072	1.24821	1.5485	1.40781	1.46183	1.49173	1.67042	1.41692	1.42868	1.30138	1.66232	1.30487	1.07068	1.32245	1.51352	1.55129	1.58236	1.69688	1.46096	1.65416	1.48523	1.61931	1.29682	1.40005	1.19519	0.526298	1.02727	1.27684	1.73589	1.29025	0.836556	1.34812	1.7391	1.42842	1.5511	1.79832	1.12312
1.6112	1.64006	1.50045	1.55886	1.77793	1.70521	0.292222	1.75481	1.60826	1.62543	1.40355	1.84634	1.10554	1.55108	1.24986	1.55707	1.41089	1.46602	1.49489	1.67187	1.41618	1.43373	1.32292	1.66727	1.28958	1.07359	1.33475	1.50631	1.54886	1.58364	1.70659	1.47	1.66126	1.49101	1.62571	1.3025	1.40719	1.21495	0.513672	1.02243	1.30043	1.72873	1.30082	0.815955	1.35584	1.76193	1.42854	1.55349	1.79913	1.14402
1.60695	1.64	1.50608	1.55276	1.78271	1.73289	0.294521	1.7573	1.5834	1.6311	1.409	1.84623	1.11786	1.5593	1.25111	1.56321	1.41325	1.46834	1.49624	1.67085	1.41463	1.43924	1.34728	1.66972	1.27195	1.07717	1.34533	1.49692	1.54888	1.58211	1.71673	1.47722	1.66524	1.49473	1.62936	1.30619	1.40965	1.23201	0.498069	1.01531	1.32236	1.72208	1.31106	0.791798	1.36394	1.78069	1.42827	1.55348	1.79594	1.16412
1.60094	1.63637	1.51182	1.54473	1.78585	1.75639	0.295455	1.75588	1.55284	1.63692	1.41224	1.84516	1.13193	1.56544	1.25223	1.56701	1.41438	1.46943	1.49625	1.66662	1.41221	1.44504	1.37422	1.67157	1.25322	1.08173	1.35389	1.4856	1.55268	1.57763	1.72798	1.48309	1.66567	1.49647	1.62962	1.30816	1.40873	1.24716	0.480523	1.00777	1.3409	1.71549	1.32086	0.765251	1.37192	1.79363	1.42847	1.5509	1.78879	1.18215
1.59447	1.62858	1.51722	1.53398	1.78738	1.77577	0.297277	1.7509	1.51826	1.64327	1.41267	1.84282	1.14699	1.56943	1.25303	1.56888	1.4139	1.47015	1.49485	1.65943	1.40889	1.4505	1.40297	1.67329	1.23485	1.08779	1.36043	1.47265	1.56077	1.57193	1.74075	1.48805	1.66237	1.49624	1.62634	1.30915	1.40571	1.26163	0.462385	1.00206	1.35499	1.70773	1.32956	0.737705	1.37827	1.79979	1.42954	1.5459	1.7777	1.19765
1.58827	1.61653	1.52041	1.52016	1.78687	1.79216	0.301402	1.74292	1.48084	1.64978	1.41007	1.83802	1.16157	1.57124	1.25229	1.56905	1.41157	1.47138	1.49167	1.64938	1.40461	1.45544	1.43215	1.67455	1.21832	1.09544	1.36528	1.45842	1.57205	1.56626	1.75422	1.49339	1.65578	1.49363	1.61967	1.31066	1.40163	1.2763	0.444374	0.998651	1.36422	1.696	1.33662	0.710731	1.38222	1.79918	1.43171	1.5386	1.76283	1.21168
1.58267	1.60001	1.52047	1.50358	1.78282	1.8084	0.308149	1.73249	1.44308	1.65478	1.40479	1.82991	1.17482	1.57114	1.24848	1.56711	1.40709	1.47331	1.48662	1.63664	1.39945	1.45941	1.45965	1.67507	1.20475	1.10377	1.3689	1.44343	1.58301	1.56161	1.76553	1.49935	1.64647	1.48922	1.61098	1.31351	1.39845	1.29189	0.425763	0.996975	1.36905	1.67917	1.34171	0.685557	1.38345	1.79299	1.43443	1.52868	1.74489	1.22612
1.57788	1.57978	1.51729	1.48574	1.77507	1.8251	0.31714	1.72156	1.4073	1.65747	1.39821	1.81802	1.18656	1.56932	1.24087	1.56316	1.40103	1.4749	1.47963	1.62169	1.39345	1.46189	1.48468	1.6742	1.1938	1.1113	1.37185	1.42778	1.59079	1.55877	1.77302	1.50543	1.63479	1.48365	1.60126	1.31808	1.39711	1.30889	0.40533	0.996175	1.37053	1.6575	1.34448	0.662618	1.38205	1.78488	1.43579	1.51704	1.72423	1.24179
1.57347	1.5573	1.51136	1.46987	1.76343	1.84172	0.327627	1.71082	1.37547	1.65727	1.39079	1.80229	1.19703	1.56549	1.22943	1.55729	1.3942	1.47611	1.47051	1.6048	1.38642	1.46254	1.50674	1.67073	1.18254	1.11668	1.37537	1.41069	1.59402	1.55721	1.77581	1.51101	1.62227	1.47762	1.59136	1.32438	1.3978	1.32699	0.382264	0.995237	1.37029	1.63227	1.34548	0.641761	1.37857	1.77638	1.43458	1.50452	1.69984	1.25888
1.56796	1.53455	1.5036	1.45733	1.74788	1.85762	0.338867	1.70017	1.34886	1.65386	1.38252	1.78479	1.20666	1.5599	1.21474	1.54962	1.38755	1.47723	1.45999	1.5854	1.37836	1.4614	1.52565	1.66507	1.1681	1.11961	1.37974	1.39223	1.59226	1.55397	1.77357	1.51544	1.60966	1.47189	1.58206	1.33178	1.40034	1.34469	0.356098	0.99295	1.37085	1.60534	1.34536	0.622515	1.37361	1.76793	1.43023	1.49197	1.67141	1.27732
1.56107	1.51335	1.4947	1.44818	1.72899	1.87169	0.350222	1.68945	1.32656	1.6474	1.37351	1.76695	1.21588	1.55266	1.19779	1.54057	1.38199	1.47853	1.44853	1.56426	1.36878	1.45924	1.5418	1.65725	1.14984	1.12207	1.38459	1.37302	1.5861	1.54701	1.76682	1.51794	1.59727	1.46648	1.5731	1.33862	1.40381	1.36098	0.326857	0.988969	1.37345	1.57779	1.34491	0.604272	1.36754	1.75993	1.42266	1.48019	1.6393	1.29639
1.55292	1.49382	1.48468	1.44179	1.70723	1.88205	0.361301	1.67788	1.30407	1.63841	1.36341	1.7499	1.22472	1.54394	1.18002	1.53033	1.37751	1.48032	1.43652	1.54217	1.3571	1.45738	1.55574	1.64718	1.12846	1.12697	1.38944	1.35389	1.57697	1.53567	1.75655	1.5186	1.58524	1.45996	1.56237	1.34376	1.40645	1.37493	0.29521	0.983245	1.37843	1.54886	1.34493	0.586541	1.36134	1.75131	1.41232	1.46906	1.60441	1.31433
1.54374	1.47342	1.47404	1.43663	1.68246	1.88858	0.372688	1.66372	1.27799	1.62781	1.35083	1.73456	1.23259	1.53409	1.16349	1.5186	1.37253	1.48251	1.4244	1.51991	1.34305	1.45589	1.56834	1.6351	1.10521	1.1347	1.39368	1.33564	1.56773	1.52017	1.74428	1.51741	1.57303	1.45162	1.54856	1.3465	1.40802	1.38569	0.262759	0.975979	1.38558	1.51815	1.34547	0.569787	1.35547	1.73829	1.39996	1.45657	1.568	1.3298
1.53392	1.45064	1.46301	1.42954	1.65579	1.89082	0.38547	1.64668	1.24784	1.61746	1.33528	1.7204	1.23927	1.52326	1.14937	1.50603	1.36574	1.48455	1.41208	1.49827	1.32676	1.45417	1.58107	1.62103	1.08152	1.14424	1.39656	1.31839	1.56205	1.50132	1.73265	1.51446	1.55866	1.44139	1.53114	1.34645	1.40837	1.39305	0.232057	0.967586	1.39376	1.48554	1.34514	0.554436	1.35002	1.71963	1.38666	1.44132	1.53074	1.3417
1.52356	1.4245	1.45162	1.4179	1.62788	1.88846	0.400526	1.62669	1.21469	1.60778	1.31679	1.70429	1.24484	1.5111	1.13822	1.49328	1.35663	1.48649	1.39835	1.47717	1.30896	1.45165	1.59349	1.60424	1.05911	1.15423	1.39806	1.30093	1.56063	1.48022	1.72227	1.51011	1.54102	1.42954	1.51013	1.3437	1.40731	1.3975	0.204841	0.958337	1.40027	1.45102	1.34285	0.540692	1.34491	1.69491	1.37428	1.42319	1.49187	1.34927
1.51194	1.39439	1.43995	1.40032	1.59916	1.88188	0.418034	1.60397	1.18018	1.59842	1.29581	1.68407	1.24955	1.49823	1.13005	1.48092	1.34513	1.48799	1.38261	1.45477	1.29117	1.44784	1.60412	1.58468	1.03984	1.16325	1.39813	1.28246	1.56217	1.45801	1.71263	1.50462	1.52015	1.41659	1.4862	1.33887	1.40492	1.40068	0.182144	0.947907	1.40309	1.41487	1.33823	0.528508	1.33973	1.66431	1.36313	1.40279	1.45181	1.35247
1.49809	1.36057	1.42788	1.3765	1.57017	1.87157	0.436897	1.57913	1.14585	1.58886	1.27317	1.65851	1.25383	1.48514	1.12396	1.46945	1.33159	1.48846	1.36483	1.43008	1.27412	1.44248	1.61169	1.56231	1.02427	1.17003	1.39677	1.26276	1.56471	1.43615	1.70294	1.4979	1.49688	1.40293	1.4602	1.33334	1.40127	1.40508	0.164219	0.935534	1.40187	1.37736	1.33133	0.517453	1.33335	1.62888	1.35261	1.38111	1.41156	1.35209
1.48182	1.32384	1.41501	1.3472	1.5407	1.85775	0.454728	1.55261	1.1133	1.57838	1.24938	1.62707	1.25852	1.4722	1.11764	1.45868	1.31664	1.48742	1.34531	1.40304	1.25801	1.4365	1.61553	1.5373	1.01194	1.17415	1.39422	1.24186	1.56621	1.41509	1.69209	1.4907	1.47249	1.38868	1.43283	1.32901	1.39645	1.4115	0.149893	0.920829	1.39742	1.33846	1.3226	0.506432	1.32503	1.58955	1.34194	1.35892	1.37228	1.34995
1.46348	1.28513	1.40203	1.31399	1.50905	1.84195	0.470468	1.52416	1.08387	1.56575	1.22398	1.59018	1.26516	1.45973	1.10953	1.4472	1.30139	1.48472	1.32464	1.37412	1.24289	1.42985	1.61583	1.51014	1.00179	1.17458	1.39066	1.22002	1.56482	1.39468	1.67848	1.48283	1.44785	1.37435	1.40553	1.3261	1.39066	1.41963	0.135835	0.903802	1.39121	1.29901	1.31265	0.493554	1.31494	1.54619	1.33028	1.33657	1.33499	1.3485
1.44374	1.24582	1.38937	1.27952	1.47475	1.82449	0.483901	1.49417	1.05711	1.55098	1.19684	1.54905	1.27448	1.44754	1.09926	1.43414	1.28744	1.48094	1.30322	1.34407	1.22819	1.422	1.61441	1.48121	0.992662	1.17022	1.38612	1.19756	1.56016	1.37465	1.66241	1.47362	1.42295	1.36017	1.37929	1.32384	1.38315	1.42875	0.119035	0.884839	1.38454	1.26048	1.30212	0.477597	1.30377	1.4994	1.3165	1.31469	1.29965	1.34858
1.42329	1.20758	1.37723	1.24704	1.43818	1.80511	0.495237	1.4626	1.03132	1.53414	1.16839	1.50581	1.28655	1.43454	1.08709	1.41927	1.27546	1.47718	1.28096	1.31345	1.2121	1.41258	1.61219	1.4503	0.98342	1.16071	1.38109	1.17506	1.55184	1.35446	1.64401	1.46256	1.39831	1.34617	1.35471	1.3213	1.37277	1.43767	0.0981578	0.864542	1.37859	1.22458	1.29216	0.457963	1.29246	1.44964	1.30043	1.29359	1.26417	1.35014
1.40288	1.17204	1.36572	1.2173	1.40019	1.78376	0.505514	1.42918	1.0046	1.51541	1.13938	1.46368	1.30102	1.4204	1.07361	1.40269	1.26538	1.47337	1.25802	1.28221	1.19318	1.40123	1.60975	1.41821	0.973368	1.14651	1.37534	1.15341	1.53988	1.33345	1.62337	1.44937	1.37407	1.33231	1.33198	1.31757	1.35878	1.44447	0.0729133	0.843611	1.37515	1.19256	1.2835	0.434656	1.28159	1.39744	1.28229	1.27333	1.2268	1.35278
1.38395	1.14008	1.35451	1.18948	1.36186	1.76006	0.517236	1.3939	0.975957	1.49526	1.11063	1.42394	1.31702	1.40486	1.05951	1.38482	1.25681	1.46882	1.23473	1.25028	1.17113	1.38734	1.60763	1.38567	0.9624	1.12889	1.36828	1.13279	1.52495	1.31248	1.60098	1.43387	1.35002	1.31839	1.31048	1.31163	1.34122	1.44799	0.0437837	0.823288	1.3742	1.16417	1.27655	0.408636	1.27117	1.34364	1.26268	1.25378	1.18753	1.35549
1.36721	1.1111	1.34268	1.16235	1.32362	1.7327	0.532713	1.35675	0.946407	1.47392	1.0824	1.38666	1.33322	1.38767	1.04562	1.36609	1.24891	1.46294	1.21151	1.21794	1.14642	1.37091	1.6054	1.35339	0.950798	1.10966	1.35947	1.11293	1.50775	1.29201	1.57696	1.41673	1.32587	1.30408	1.28808	1.30314	1.3211	1.44767	0.0121421	0.804845	1.37436	1.13668	1.27137	0.38255	1.26165	1.28855	1.24238	1.23465	1.14724	1.35618
1.35273	1.08253	1.32977	1.13438	1.28453	1.70215	0.553114	1.31752	0.918575	1.45083	1.05402	1.35135	1.34884	1.36883	1.03244	1.34699	1.24033	1.45537	1.18872	1.18568	1.11998	1.35175	1.60072	1.32202	0.938969	1.08918	1.34875	1.09341	1.48898	1.27207	1.55052	1.39843	1.30128	1.28986	1.26305	1.29232	1.30045	1.44359	-0.0191272	0.789378	1.374	1.10716	1.26743	0.359522	1.25289	1.23148	1.22176	1.21536	1.10692	1.35371
1.34026	1.05259	1.31514	1.10303	1.24385	1.66916	0.578678	1.27703	0.893181	1.42571	1.02554	1.31665	1.363	1.34854	1.0195	1.32815	1.23038	1.44605	1.1664	1.15396	1.09267	1.32979	1.59202	1.29142	0.927294	1.06727	1.33615	1.07377	1.47038	1.25265	1.52142	1.37951	1.27567	1.27573	1.23517	1.2799	1.28043	1.43649	-0.0472017	0.777464	1.37191	1.07464	1.26329	0.34051	1.24428	1.17395	1.20029	1.19595	1.06736	1.3481
1.32902	1.01991	1.29805	1.06647	1.20159	1.63474	0.608794	1.23608	0.869818	1.39841	0.997304	1.27947	1.37477	1.32712	1.00579	1.30976	1.21865	1.43576	1.14397	1.12291	1.06504	1.30535	1.57854	1.26014	0.916286	1.04393	1.32239	1.05355	1.45126	1.23325	1.4891	1.36051	1.24891	1.2614	1.2052	1.26685	1.26175	1.42728	-0.0718883	0.768563	1.3675	1.03923	1.2578	0.32508	1.23517	1.11713	1.17761	1.17663	1.02885	1.34014
1.31756	0.983519	1.27816	1.02546	1.15815	1.60009	0.642146	1.19545	0.847718	1.36896	0.969684	1.23791	1.38356	1.30528	0.990416	1.29165	1.205	1.42457	1.1213	1.09214	1.03757	1.27878	1.56018	1.22776	0.906135	1.01879	1.30801	1.03271	1.42951	1.21241	1.45306	1.34143	1.22147	1.24659	1.17431	1.25368	1.24486	1.41695	-0.0945937	0.760238	1.36079	1.0016	1.25065	0.312186	1.22514	1.06173	1.15328	1.15763	0.991185	1.33103
1.30497	0.943355	1.2557	0.982526	1.11409	1.56542	0.67671	1.15586	0.825631	1.33771	0.942968	1.19185	1.38962	1.28309	0.973115	1.27361	1.18964	1.41226	1.09858	1.06149	1.01057	1.25005	1.53764	1.1942	0.895834	0.990611	1.29355	1.0112	1.40336	1.1887	1.41333	1.32106	1.19419	1.23104	1.14355	1.2399	1.22913	1.40723	-0.117115	0.749817	1.35227	0.96303	1.24199	0.300295	1.21413	1.00825	1.12683	1.1391	0.95431	1.32158
1.29087	0.900245	1.23187	0.940469	1.06987	1.5288	0.710454	1.11716	0.8014	1.30501	0.917072	1.14238	1.39456	1.26029	0.954833	1.25535	1.17295	1.39879	1.07603	1.0314	0.984217	1.21984	1.51193	1.1595	0.88375	0.959824	1.27949	0.988989	1.37193	1.16125	1.3703	1.29869	1.1679	1.21442	1.11372	1.22513	1.21161	1.39836	-0.140924	0.736651	1.34295	0.925933	1.23229	0.28712	1.20214	0.956038	1.09817	1.12098	0.91812	1.31169
1.27519	0.855922	1.20871	0.90075	1.02563	1.48901	0.742451	1.07745	0.77274	1.27096	0.891387	1.09114	1.4002	1.23671	0.937623	1.23663	1.15562	1.38394	1.05389	1.00247	0.958578	1.18871	1.48423	1.12382	0.86856	0.927324	1.26572	0.966163	1.33554	1.12971	1.32465	1.27408	1.14282	1.19677	1.08592	1.20904	1.18944	1.38964	-0.166864	0.72126	1.33396	0.89265	1.22211	0.270974	1.18947	0.902253	1.06752	1.10278	0.882452	1.30122
1.2581	0.812469	1.18653	0.862592	0.982074	1.44588	0.772441	1.03508	0.737909	1.23643	0.865617	1.0394	1.40622	1.21216	0.922282	1.21789	1.1384	1.36694	1.03219	0.975119	0.933466	1.1572	1.45656	1.08732	0.850041	0.894311	1.25097	0.942776	1.29634	1.09437	1.27831	1.24734	1.11829	1.17778	1.06021	1.19135	1.16225	1.38025	-0.194688	0.7046	1.32571	0.863787	1.21229	0.251441	1.17669	0.844816	1.03537	1.08376	0.847319	1.28995
1.23997	0.771186	1.16465	0.825083	0.939776	1.39983	0.800559	0.98982	0.695952	1.20227	0.839467	0.987164	1.41125	1.18641	0.908836	1.19927	1.12108	1.3476	1.0106	0.94934	0.908124	1.12588	1.43002	1.0499	0.829551	0.862044	1.23429	0.918653	1.25559	1.05608	1.23254	1.2189	1.09376	1.15708	1.03586	1.17204	1.1313	1.36933	-0.223865	0.687912	1.31766	0.838687	1.20371	0.229002	1.16434	0.783042	1.00278	1.06338	0.813269	1.27762
1.22176	0.732703	1.14228	0.78708	0.899094	1.35174	0.827614	0.94225	0.647047	1.16925	0.812584	0.933829	1.41404	1.15996	0.896972	1.18073	1.10293	1.32599	0.988879	0.9243	0.882021	1.09471	1.4051	1.01162	0.80887	0.83063	1.21542	0.893384	1.2143	1.01651	1.18817	1.18926	1.06864	1.13454	1.01183	1.15132	1.09846	1.35569	-0.253556	0.673089	1.30962	0.81604	1.19632	0.204603	1.15261	0.717127	0.970881	1.04127	0.781188	1.26406
1.20453	0.696835	1.11856	0.747156	0.860125	1.30239	0.855624	0.893314	0.592616	1.13795	0.78471	0.87927	1.4139	1.13308	0.885758	1.16218	1.08331	1.30242	0.966827	0.898667	0.855763	1.06237	1.38194	0.972357	0.789266	0.797965	1.19457	0.866827	1.17349	0.977914	1.14581	1.15876	1.04227	1.11025	0.987315	1.12943	1.06539	1.33887	-0.282853	0.661777	1.30049	0.79444	1.18943	0.179219	1.14125	0.647851	0.940751	1.01736	0.751515	1.24934
1.18774	0.662397	1.0925	0.704293	0.822484	1.25208	0.885803	0.8439	0.53557	1.10812	0.755875	0.823611	1.4111	1.10592	0.873222	1.14341	1.06192	1.27751	0.944257	0.872129	0.830523	1.02818	1.35978	0.931956	0.771777	0.762562	1.17226	0.839108	1.13281	0.941108	1.10484	1.12828	1.01426	1.08451	0.961935	1.10689	1.03301	1.31946	-0.311569	0.654103	1.28862	0.772657	1.18226	0.153683	1.13022	0.57628	0.913118	0.992033	0.724233	1.23382
1.16995	0.62724	1.06427	0.658581	0.785089	1.2018	0.917682	0.794501	0.479262	1.0781	0.726532	0.76713	1.40739	1.07866	0.857624	1.1239	1.0388	1.25157	0.921049	0.844948	0.807312	0.992509	1.33613	0.890403	0.756995	0.723907	1.1491	0.810534	1.08919	0.906003	1.06235	1.09839	0.984732	1.05799	0.935769	1.08479	1.00194	1.29885	-0.34112	0.649084	1.27285	0.74984	1.17423	0.128328	1.11903	0.503383	0.88765	0.966342	0.698929	1.2186
1.14987	0.590064	1.03378	0.611465	0.747066	1.15242	0.949874	0.745449	0.425279	1.04678	0.697072	0.710182	1.40334	1.05116	0.837883	1.1033	1.01465	1.22431	0.897274	0.817495	0.786413	0.956254	1.30947	0.847824	0.744362	0.682063	1.12552	0.781445	1.04048	0.872232	1.01608	1.06943	0.954661	1.03097	0.909003	1.06452	0.972789	1.2786	-0.373623	0.645286	1.25314	0.725686	1.16522	0.102665	1.10687	0.429729	0.86222	0.941539	0.674945	1.20464
1.127	0.549507	1.00089	0.564741	0.708034	1.10457	0.980904	0.697239	0.374199	1.01381	0.667529	0.653179	1.39889	1.02249	0.813542	1.0812	0.99018	1.19606	0.873341	0.790329	0.766899	0.920388	1.2799	0.804556	0.731395	0.637573	1.1023	0.75203	0.985842	0.838888	0.965755	1.04153	0.92527	1.00357	0.881992	1.04709	0.945938	1.25937	-0.41015	0.641593	1.23075	0.700308	1.15545	0.0758087	1.09314	0.355825	0.834755	0.918255	0.6513	1.19269
1.1023	0.504525	0.965858	0.520555	0.667873	1.05864	1.01008	0.650357	0.326053	0.979227	0.637807	0.597249	1.39403	0.991905	0.784886	1.05724	0.966176	1.16715	0.849763	0.764466	0.747157	0.885308	1.24847	0.761538	0.715567	0.591227	1.07994	0.722543	0.925334	0.804161	0.912239	1.01432	0.897191	0.975978	0.855137	1.03243	0.921413	1.24015	-0.450957	0.637585	1.20736	0.674057	1.14521	0.0470802	1.07774	0.282218	0.804604	0.896699	0.626366	1.18319
1.07829	0.455115	0.928838	0.481117	0.62665	1.01423	1.03822	0.605083	0.279604	0.943356	0.607836	0.543903	1.38817	0.959321	0.752917	1.03138	0.94332	1.13787	0.826635	0.740675	0.726551	0.85012	1.21655	0.719146	0.695841	0.544206	1.0587	0.693618	0.859977	0.767382	0.856914	0.986526	0.870675	0.948084	0.828576	1.01864	0.898826	1.22008	-0.495586	0.633017	1.18449	0.647397	1.13489	0.0163583	1.06124	0.209421	0.771967	0.876772	0.599261	1.17567
1.05555	0.402136	0.889416	0.447673	0.584703	0.969615	1.06703	0.561282	0.230873	0.906675	0.577541	0.494627	1.37933	0.925112	0.719546	1.00384	0.921516	1.10858	0.803815	0.719097	0.704955	0.813644	1.18504	0.677387	0.672188	0.498665	1.03865	0.666021	0.791139	0.728677	0.801011	0.957167	0.845654	0.919131	0.80212	1.00361	0.877363	1.19865	-0.542857	0.628047	1.16365	0.620933	1.1249	-0.0158143	1.04437	0.13751	0.737535	0.857906	0.569713	1.16831
1.0336	0.347248	0.847455	0.419525	0.542747	0.92346	1.09723	0.518124	0.176334	0.869817	0.546775	0.450263	1.36596	0.889878	0.68702	0.975294	0.899101	1.07928	0.781118	0.699382	0.682468	0.775923	1.15374	0.636187	0.645335	0.455249	1.01941	0.640298	0.720187	0.688614	0.745169	0.926171	0.821582	0.888856	0.77568	0.986691	0.856858	1.17551	-0.590864	0.62314	1.14586	0.594605	1.1153	-0.0481462	1.02772	0.0656765	0.702323	0.838675	0.537879	1.15942
1.01171	0.292871	0.802956	0.393436	0.501177	0.875731	1.12905	0.474887	0.116575	0.833295	0.515597	0.410232	1.34755	0.854111	0.65607	0.946747	0.874267	1.04945	0.75833	0.680901	0.659697	0.737661	1.12202	0.595159	0.616598	0.413585	0.999995	0.616382	0.6494	0.647957	0.689741	0.894008	0.797212	0.857527	0.748464	0.968027	0.837811	1.15058	-0.637468	0.618753	1.13071	0.567615	1.10557	-0.0790302	1.01184	-0.0062448	0.667878	0.817612	0.504565	1.14813
0.988776	0.240249	0.756174	0.366147	0.459934	0.82706	1.16244	0.431899	0.0546263	0.79721	0.48422	0.371839	1.32447	0.817815	0.62655	0.918572	0.846605	1.01932	0.735254	0.663114	0.638278	0.699652	1.08961	0.553115	0.588105	0.373	0.979706	0.593059	0.580266	0.60709	0.634959	0.861354	0.771384	0.825717	0.719312	0.948156	0.820846	1.1242	-0.680668	0.615106	1.11531	0.538863	1.09522	-0.106793	0.997065	-0.0771856	0.635877	0.794491	0.471764	1.13411
0.962861	0.18972	0.707684	0.335272	0.418738	0.778237	1.19672	0.389938	-0.00609777	0.761411	0.452952	0.332162	1.29783	0.780941	0.598027	0.890798	0.816581	0.989051	0.711994	0.645861	0.619834	0.66251	1.05638	0.50886	0.562247	0.33248	0.958479	0.568741	0.513664	0.56523	0.580892	0.828757	0.743524	0.79406	0.687385	0.927997	0.806269	1.09707	-0.718778	0.612231	1.09684	0.507524	1.08372	-0.130344	0.983172	-0.145643	0.606841	0.769873	0.441456	1.11748
0.932453	0.140878	0.65789	0.299039	0.377295	0.729871	1.23016	0.349638	-0.0635414	0.725678	0.42208	0.289793	1.26877	0.743866	0.569592	0.863373	0.785062	0.958717	0.688494	0.629041	0.604994	0.626592	1.02234	0.462415	0.540011	0.29092	0.93659	0.543311	0.44999	0.520755	0.527508	0.79648	0.713509	0.762775	0.652654	0.909139	0.793919	1.07014	-0.751003	0.609738	1.07425	0.473612	1.07058	-0.15013	0.969125	-0.210486	0.580399	0.74459	0.413999	1.09901
0.896542	0.0924124	0.606511	0.25684	0.335459	0.682135	1.26103	0.311226	-0.118352	0.689809	0.391611	0.244159	1.23802	0.707187	0.539472	0.83596	0.753016	0.928409	0.664623	0.612539	0.593602	0.592258	0.987743	0.414581	0.521316	0.248932	0.914448	0.517452	0.388351	0.473281	0.474656	0.764692	0.681632	0.731092	0.616205	0.893049	0.783178	1.0446	-0.778261	0.606494	1.04766	0.438389	1.05557	-0.16915	0.95405	-0.271752	0.555687	0.719433	0.388727	1.08047
0.854844	0.0417773	0.553943	0.209977	0.293314	0.634654	1.2881	0.274218	-0.172709	0.653799	0.360831	0.195252	1.20695	0.671441	0.506937	0.807718	0.721375	0.898013	0.640296	0.596215	0.584909	0.559947	0.953261	0.366348	0.505377	0.206073	0.892406	0.491956	0.325591	0.423319	0.422024	0.73336	0.64853	0.698043	0.579517	0.880312	0.772771	1.02165	-0.804415	0.60103	1.018	0.403646	1.03893	-0.190947	0.937342	-0.331862	0.53168	0.695044	0.36459	1.06377
0.80801	-0.0129511	0.501138	0.162602	0.251173	0.587244	1.31065	0.237198	-0.227082	0.618247	0.328701	0.144189	1.17654	0.636775	0.472355	0.778407	0.691005	0.867205	0.61546	0.579894	0.577898	0.529919	0.919992	0.318421	0.490877	0.161304	0.870733	0.467537	0.25953	0.371781	0.369889	0.702265	0.615337	0.663671	0.54348	0.870754	0.761247	1.00199	-0.833843	0.592297	0.986746	0.370669	1.02148	-0.216966	0.918639	-0.394875	0.507223	0.671701	0.340537	1.04931
0.757219	-0.0726386	0.449296	0.119058	0.209438	0.539794	1.32869	0.199678	-0.281211	0.583364	0.295229	0.0941089	1.14748	0.60276	0.436751	0.748063	0.662638	0.836263	0.589986	0.563531	0.571507	0.502104	0.889014	0.270654	0.475809	0.113879	0.849642	0.44486	0.190186	0.319696	0.319077	0.671147	0.583332	0.628615	0.508711	0.86361	0.74713	0.985247	-0.867301	0.580367	0.956025	0.340427	1.00438	-0.247335	0.897986	-0.461427	0.481379	0.649413	0.315442	1.03654
0.703955	-0.137081	0.399458	0.0811276	0.168541	0.492218	1.34316	0.161685	-0.334784	0.549093	0.261064	0.0478213	1.1202	0.569292	0.401318	0.716887	0.636742	0.804894	0.563699	0.547311	0.564719	0.476144	0.8612	0.222186	0.458575	0.0634424	0.828924	0.424077	0.11881	0.268084	0.270522	0.639849	0.552881	0.593622	0.475544	0.857902	0.729409	0.9694	-0.903476	0.56675	0.928238	0.313397	0.988258	-0.281339	0.875852	-0.530127	0.453945	0.627944	0.288323	1.02459
0.650418	-0.204978	0.351628	0.0488509	0.128785	0.444644	1.35631	0.123362	-0.387086	0.515305	0.226959	0.0056268	1.09424	0.53657	0.366589	0.68521	0.613369	0.772491	0.536542	0.530892	0.556702	0.451471	0.836902	0.173205	0.438752	0.00986506	0.808089	0.405242	0.0470128	0.21822	0.224794	0.608348	0.523722	0.559244	0.443512	0.852558	0.708477	0.952238	-0.940487	0.553001	0.9046	0.288906	0.973476	-0.317317	0.853212	-0.599193	0.425263	0.606927	0.259261	1.01253
0.597755	-0.274859	0.303889	0.0210036	0.0900528	0.397632	1.3709	0.0852489	-0.43672	0.481674	0.193491	-0.033702	1.06767	0.504803	0.331619	0.653205	0.592033	0.738584	0.508604	0.513753	0.546827	0.427422	0.815544	0.124484	0.416746	-0.0468395	0.786652	0.388174	-0.0240525	0.171531	0.18166	0.576767	0.495314	0.525719	0.410599	0.846364	0.687231	0.93291	-0.976291	0.540568	0.885285	0.264461	0.960108	-0.351921	0.831321	-0.666711	0.395922	0.586114	0.229085	0.999429
0.546463	-0.345977	0.254464	-0.00468409	0.0514105	0.351903	1.38787	0.048664	-0.482571	0.447524	0.160905	-0.0718867	1.03958	0.474077	0.294888	0.620553	0.571447	0.702998	0.480083	0.4954	0.53482	0.403657	0.795138	0.0767927	0.393414	-0.107061	0.764419	0.372426	-0.0942556	0.129219	0.139575	0.545523	0.466971	0.49337	0.374765	0.838857	0.668921	0.911349	-1.00838	0.530857	0.869594	0.237708	0.947696	-0.381532	0.810809	-0.730267	0.366509	0.565423	0.198803	0.985145
0.496716	-0.417393	0.203214	-0.0318689	0.0115381	0.308096	1.40707	0.0145166	-0.522664	0.412255	0.129224	-0.110398	1.01024	0.444272	0.255829	0.58684	0.550316	0.6661	0.451177	0.475554	0.521103	0.379941	0.773333	0.0306466	0.369706	-0.171057	0.741713	0.357684	-0.164078	0.091789	0.0961652	0.51517	0.437664	0.462534	0.335554	0.830121	0.654369	0.887967	-1.0353	0.524698	0.8561	0.207577	0.934925	-0.405017	0.791844	-0.788211	0.337652	0.544803	0.169078	0.969695
0.447737	-0.487498	0.150848	-0.0639936	-0.0298924	0.266651	1.42793	-0.01666	-0.555061	0.375407	0.0986699	-0.149898	0.980504	0.41499	0.214484	0.552006	0.528553	0.628989	0.421993	0.454416	0.507403	0.356045	0.749127	-0.0138124	0.346817	-0.238585	0.719133	0.343985	-0.233914	0.0585421	0.0503648	0.486108	0.406464	0.433374	0.293556	0.820518	0.64296	0.863733	-1.05702	0.521615	0.842439	0.173818	0.920737	-0.423047	0.774231	-0.839827	0.309761	0.52475	0.13999	0.95326
0.396417	-0.554682	0.0982729	-0.102374	-0.0725882	0.227621	1.44927	-0.0447266	-0.579104	0.3367	0.0694453	-0.190027	0.951276	0.38561	0.171271	0.516242	0.506695	0.591677	0.392777	0.432841	0.49541	0.332067	0.722336	-0.0564616	0.325904	-0.309177	0.696993	0.330976	-0.304206	0.0268172	0.00194101	0.458313	0.37344	0.405809	0.249875	0.810687	0.633491	0.840622	-1.07474	0.519066	0.826368	0.136834	0.904725	-0.437296	0.757335	-0.885426	0.282337	0.506022	0.111166	0.936179
0.33981	-0.618178	0.0462877	-0.146608	-0.116042	0.190563	1.46906	-0.0700421	-0.595699	0.296104	0.0415743	-0.230739	0.922984	0.355826	0.126979	0.479872	0.485339	0.553606	0.363774	0.411681	0.48485	0.308659	0.693253	-0.0966673	0.306489	-0.38251	0.675458	0.318742	-0.375324	-0.00656516	-0.048855	0.431114	0.339363	0.37954	0.205669	0.801897	0.624403	0.820542	-1.09033	0.51432	0.807204	0.0977332	0.886913	-0.449851	0.739821	-0.926221	0.254329	0.489154	0.0819862	0.918628
0.278593	-0.678607	-0.00462193	-0.195048	-0.159609	0.15422	1.4865	-0.0932398	-0.607671	0.253934	0.0149416	-0.272073	0.895078	0.325505	0.0829976	0.4432	0.465016	0.514286	0.335203	0.391627	0.474377	0.285692	0.662883	-0.13381	0.287048	-0.457498	0.654584	0.30758	-0.447165	-0.042258	-0.100979	0.403572	0.305206	0.35405	0.161898	0.795215	0.613635	0.803974	-1.10504	0.506336	0.785346	0.0588716	0.867656	-0.463081	0.720468	-0.963534	0.224775	0.474178	0.0517096	0.900315
0.215647	-0.738791	-0.0545042	-0.245532	-0.202532	0.116706	1.5015	-0.115298	-0.619568	0.210747	-0.0107442	-0.31396	0.866579	0.294582	0.0412119	0.406459	0.446273	0.473355	0.307224	0.37324	0.462574	0.262859	0.633573	-0.16774	0.266004	-0.53305	0.634152	0.297626	-0.518633	-0.079522	-0.151954	0.375174	0.271637	0.328745	0.119316	0.79027	0.599579	0.790364	-1.11901	0.495138	0.761787	0.0229381	0.847518	-0.47883	0.698923	-0.998323	0.193337	0.460518	0.0198216	0.88068
0.154176	-0.801977	-0.103164	-0.295087	-0.244426	0.0773253	1.51442	-0.137907	-0.633724	0.166809	-0.0359896	-0.356507	0.836958	0.263261	0.00287186	0.370147	0.42899	0.430651	0.279761	0.356778	0.448574	0.239829	0.607479	-0.198792	0.24255	-0.60801	0.613449	0.288952	-0.587932	-0.117304	-0.199387	0.345664	0.238794	0.30345	0.0785925	0.785783	0.581539	0.778591	-1.1326	0.481448	0.737792	-0.00961125	0.827337	-0.497849	0.675476	-1.03193	0.160539	0.447252	-0.0135941	0.859167
0.0960289	-0.868622	-0.150405	-0.340062	-0.284883	0.036147	1.52596	-0.16152	-0.651185	0.122484	-0.0606875	-0.400564	0.805943	0.23216	-0.0313949	0.334681	0.412695	0.386835	0.252315	0.341909	0.432356	0.216306	0.584908	-0.227985	0.217021	-0.681301	0.591711	0.281783	-0.653995	-0.154268	-0.2425	0.31501	0.206691	0.278176	0.0401559	0.780365	0.559635	0.767476	-1.14524	0.466594	0.715266	-0.0397477	0.80803	-0.520024	0.650814	-1.0647	0.127146	0.433546	-0.0477967	0.835367
0.0404521	-0.937378	-0.196242	-0.379896	-0.323581	-0.00642525	1.53661	-0.185836	-0.67222	0.078286	-0.0844796	-0.447848	0.77349	0.201531	-0.0616267	0.300346	0.396652	0.341805	0.224474	0.327231	0.414582	0.192371	0.56497	-0.257275	0.190255	-0.753021	0.568546	0.275757	-0.716386	-0.188406	-0.281651	0.283586	0.175077	0.252934	0.00401918	0.77327	0.534643	0.75591	-1.15574	0.452873	0.696139	-0.0689081	0.789776	-0.544652	0.625697	-1.09651	0.0940541	0.418607	-0.0819917	0.809227
-0.0143568	-1.00617	-0.240761	-0.416272	-0.360476	-0.0495243	1.54622	-0.210391	-0.695155	0.03471	-0.107149	-0.499194	0.740015	0.171445	-0.0888167	0.267257	0.3801	0.295159	0.196267	0.310975	0.395713	0.168815	0.546316	-0.287337	0.163132	-0.825714	0.54385	0.270219	-0.775262	-0.218791	-0.317882	0.252432	0.143445	0.227883	-0.0302874	0.764728	0.507601	0.742851	-1.16328	0.442739	0.680135	-0.0985181	0.77226	-0.570664	0.600886	-1.12736	0.0622978	0.401908	-0.114854	0.78114
-0.0685536	-1.07313	-0.28397	-0.451692	-0.395804	-0.0915031	1.5543	-0.234456	-0.714716	-0.00811751	-0.1286	-0.554604	0.706842	0.141891	-0.115289	0.23518	0.362876	0.246767	0.167942	0.292842	0.37628	0.146384	0.527726	-0.318111	0.136724	-0.901476	0.517779	0.264351	-0.831592	-0.245667	-0.35254	0.222521	0.111296	0.203488	-0.0640177	0.755104	0.479629	0.727991	-1.16767	0.437111	0.665474	-0.12968	0.755005	-0.596431	0.577204	-1.15697	0.0326472	0.383703	-0.144842	0.752092
-0.121687	-1.13719	-0.325955	-0.488478	-0.430142	-0.131211	1.56036	-0.25683	-0.7268	-0.0507808	-0.148829	-0.613467	0.675806	0.112787	-0.143234	0.203403	0.345926	0.196532	0.139762	0.273434	0.356873	0.125451	0.508354	-0.349372	0.111947	-0.979929	0.490743	0.257438	-0.887667	-0.27014	-0.387452	0.194313	0.0784592	0.179716	-0.0985229	0.744919	0.451665	0.711622	-1.16947	0.435664	0.650071	-0.16229	0.737521	-0.620801	0.554929	-1.18406	0.00496795	0.365533	-0.170974	0.723671
-0.1734	-1.19795	-0.366495	-0.528431	-0.464205	-0.168296	1.56406	-0.277369	-0.730541	-0.0936687	-0.168539	-0.674664	0.647682	0.0840582	-0.173568	0.171453	0.330178	0.144216	0.111898	0.253618	0.337511	0.106125	0.487758	-0.380374	0.0887687	-1.05938	0.46346	0.249462	-0.94631	-0.29367	-0.4247	0.167881	0.0451585	0.156261	-0.13365	0.734957	0.423792	0.694338	-1.17083	0.437234	0.632586	-0.196494	0.719409	-0.644533	0.53387	-1.20892	-0.022377	0.348913	-0.193514	0.69691
-0.223219	-1.25421	-0.405338	-0.572197	-0.497984	-0.202985	1.56539	-0.296169	-0.727261	-0.136372	-0.188149	-0.736597	0.622479	0.0556357	-0.206459	0.139096	0.316171	0.0904421	0.0842818	0.234288	0.316996	0.0882764	0.465959	-0.409264	0.0655127	-1.13801	0.436665	0.241507	-1.00877	-0.317058	-0.464646	0.142972	0.0115991	0.132702	-0.168437	0.725939	0.395654	0.676809	-1.17359	0.440302	0.612766	-0.232443	0.700809	-0.669437	0.513566	-1.23316	-0.0512153	0.334466	-0.214516	0.672432
-0.270889	-1.30499	-0.442464	-0.619679	-0.531154	-0.235901	1.56473	-0.31353	-0.719561	-0.178143	-0.20791	-0.797373	0.599722	0.0273837	-0.24162	0.106191	0.304183	0.0353701	0.0565279	0.216328	0.294154	0.0715107	0.443356	-0.434971	0.0404055	-1.21478	0.410741	0.23432	-1.0752	-0.339712	-0.5065	0.119062	-0.0215536	0.108649	-0.20192	0.717977	0.366881	0.65986	-1.17934	0.443055	0.590556	-0.270005	0.681828	-0.697181	0.493463	-1.25895	-0.0823685	0.322235	-0.236394	0.65046
-0.31749	-1.35048	-0.478034	-0.669911	-0.56345	-0.267738	1.56318	-0.329963	-0.709952	-0.218349	-0.228004	-0.855408	0.578441	-0.000511352	-0.278136	0.0726783	0.29414	-0.0210106	0.0285824	0.200173	0.268446	0.0548835	0.420484	-0.457469	0.0124239	-1.2904	0.385843	0.228379	-1.1451	-0.360976	-0.549123	0.095227	-0.0533734	0.0840768	-0.233462	0.710293	0.337121	0.644059	-1.18906	0.443724	0.56664	-0.309049	0.662588	-0.728428	0.472871	-1.28812	-0.116029	0.311821	-0.260382	0.630339
-0.36146	-1.39156	-0.512491	-0.721392	-0.594662	-0.299445	1.5629	-0.345717	-0.700359	-0.256886	-0.248208	-0.909467	0.557016	-0.0277232	-0.31403	0.0386879	0.285583	-0.0785762	0.000579728	0.186099	0.23984	0.0369606	0.397687	-0.477466	-0.0189406	-1.36675	0.361935	0.224018	-1.21711	-0.38028	-0.591385	0.0703632	-0.0831804	0.0595362	-0.262812	0.702191	0.305623	0.628963	-1.20198	0.44162	0.542417	-0.349739	0.643267	-0.762498	0.451222	-1.32079	-0.151905	0.302468	-0.287013	0.609905
-0.400028	-1.42972	-0.547202	-0.773141	-0.624653	-0.33251	1.56507	-0.360746	-0.693258	-0.294719	-0.267545	-0.958953	0.534035	-0.054022	-0.347859	0.00460438	0.277532	-0.137447	-0.0273268	0.174097	0.208783	0.0174769	0.374945	-0.496059	-0.0535899	-1.44378	0.338692	0.221256	-1.28865	-0.397164	-0.632205	0.0441785	-0.110969	0.0354931	-0.290402	0.692847	0.272078	0.613521	-1.21494	0.436915	0.519325	-0.392359	0.623879	-0.797988	0.428627	-1.35441	-0.189147	0.292999	-0.316214	0.587162
-0.431301	-1.46793	-0.582697	-0.824895	-0.654083	-0.366721	1.5701	-0.375768	-0.689368	-0.333484	-0.285283	-1.00464	0.508699	-0.0794067	-0.379785	-0.0294448	0.268612	-0.19851	-0.0549428	0.163806	0.176	-0.00308638	0.351738	-0.514018	-0.0906708	-1.52042	0.315252	0.219759	-1.35773	-0.411575	-0.671429	0.0169226	-0.137668	0.0123575	-0.316831	0.681394	0.237671	0.596721	-1.22563	0.430344	0.497884	-0.437629	0.604109	-0.833226	0.405664	-1.38676	-0.226036	0.282216	-0.346993	0.561563
-0.454927	-1.50709	-0.618976	-0.875558	-0.683278	-0.400836	1.57796	-0.39017	-0.688018	-0.373305	-0.301052	-1.04945	0.480672	-0.104452	-0.410884	-0.0635719	0.257996	-0.262097	-0.0819246	0.154805	0.142307	-0.0240778	0.327252	-0.531499	-0.128245	-1.59563	0.290813	0.218797	-1.42375	-0.423912	-0.709492	-0.0109304	-0.164427	-0.00951925	-0.342927	0.667361	0.204445	0.578138	-1.23192	0.422996	0.477031	-0.486284	0.5837	-0.866266	0.383018	-1.4161	-0.260702	0.269484	-0.376915	0.533454
-0.472241	-1.54677	-0.655903	-0.926456	-0.712385	-0.433605	1.58765	-0.402611	-0.687981	-0.413466	-0.314791	-1.09593	0.450059	-0.130475	-0.442392	-0.0979746	0.245286	-0.32805	-0.107926	0.146652	0.108856	-0.0447904	0.300629	-0.549169	-0.16396	-1.6685	0.265409	0.217431	-1.48694	-0.435134	-0.747214	-0.0387979	-0.19202	-0.0300072	-0.369544	0.650999	0.174236	0.558043	-1.23196	0.416692	0.45539	-0.538553	0.562249	-0.895587	0.361112	-1.44103	-0.292347	0.254641	-0.403713	0.503614
-0.486121	-1.58605	-0.692921	-0.980403	-0.741552	-0.464227	1.59678	-0.412058	-0.687794	-0.45321	-0.326791	-1.14455	0.417534	-0.157573	-0.475069	-0.132814	0.230475	-0.395809	-0.132757	0.138496	0.0767716	-0.0645827	0.271378	-0.566913	-0.196635	-1.7382	0.23956	0.215075	-1.54801	-0.447258	-0.785434	-0.0659408	-0.221021	-0.0493182	-0.396808	0.633531	0.147494	0.536751	-1.22503	0.413266	0.431927	-0.594074	0.53932	-0.921398	0.339935	-1.46102	-0.320976	0.237957	-0.426389	0.47304
-0.498364	-1.62347	-0.72876	-1.0398	-0.770584	-0.492581	1.60371	-0.418164	-0.68545	-0.491825	-0.337525	-1.19472	0.384602	-0.185097	-0.508735	-0.168089	0.214201	-0.464552	-0.156408	0.130432	0.0470398	-0.0836192	0.239752	-0.584109	-0.225919	-1.80421	0.213873	0.211419	-1.60791	-0.46179	-0.824426	-0.0919395	-0.251691	-0.0682946	-0.423569	0.61651	0.122295	0.515223	-1.21216	0.412407	0.405813	-0.65194	0.514688	-0.946923	0.319297	-1.47692	-0.347164	0.2201	-0.444939	0.443101
-0.510441	-1.65658	-0.762871	-1.10544	-0.798558	-0.519601	1.60748	-0.421518	-0.679994	-0.528691	-0.347625	-1.24554	0.352502	-0.212323	-0.542441	-0.203454	0.198158	-0.533771	-0.179046	0.123076	0.0202095	-0.101772	0.206986	-0.600213	-0.252105	-1.86568	0.188778	0.206453	-1.66823	-0.479735	-0.864042	-0.116765	-0.283631	-0.0882853	-0.449001	0.600876	0.0961457	0.494889	-1.19706	0.412401	0.376714	-0.710521	0.488502	-0.975699	0.298865	-1.4919	-0.37194	0.20235	-0.460194	0.415106
-0.523578	-1.68405	-0.794904	-1.17601	-0.824815	-0.545859	1.60763	-0.423859	-0.672404	-0.563954	-0.358132	-1.29601	0.321222	-0.238597	-0.575541	-0.238278	0.183945	-0.603877	-0.200939	0.116979	-0.00417546	-0.118797	0.174722	-0.61489	-0.276331	-1.92205	0.164345	0.200605	-1.73064	-0.501461	-0.904783	-0.140697	-0.315376	-0.109637	-0.472488	0.587182	0.0681661	0.476945	-1.18472	0.411312	0.345172	-0.768301	0.461447	-1.00914	0.278146	-1.51004	-0.396883	0.186055	-0.473483	0.389134
-0.537254	-1.70539	-0.824701	-1.24901	-0.849061	-0.571817	1.60426	-0.425987	-0.664854	-0.597428	-0.369504	-1.34506	0.2901	-0.263354	-0.607545	-0.272333	0.172039	-0.675067	-0.222437	0.112523	-0.028201	-0.134596	0.144326	-0.628077	-0.300891	-1.97352	0.140267	0.194973	-1.7945	-0.526071	-0.945146	-0.164176	-0.34548	-0.132053	-0.493571	0.575553	0.0383013	0.461534	-1.17648	0.407938	0.312743	-0.82384	0.434544	-1.04735	0.256683	-1.53287	-0.423356	0.171485	-0.48667	0.364442
[truncated: 77 more columns]

## Sheet: yMeanLoRewardHiSD
0.231732
0.205625
0.179209
0.152593
0.125812
0.0988838
0.0718019
0.0444595
0.0166664
-0.011704
-0.0406074
-0.0699174
-0.0995216
-0.129347
-0.159301
-0.189304
-0.219358
-0.249462
-0.279625
-0.309887
-0.34026
-0.370742
-0.401328
-0.431967
-0.462596
-0.493175
-0.523667
-0.554069
-0.584396
-0.614652
-0.644803
-0.674758
-0.70439
-0.733639
-0.762523
-0.791073
-0.819244
-0.846952
-0.874193
-0.900978
-0.927259
-0.953059
-0.978399
-1.00323
-1.02747
-1.05103
-1.07382
-1.09579
-1.11694
-1.13726
-1.15676
-1.17546
-1.19339
-1.21063
-1.22728
-1.24334
-1.25873
-1.27341
-1.28724
-1.30014
-1.31219
-1.32344
-1.33387
-1.34348
-1.35221
-1.35991
-1.3665
-1.37187
-1.37609
-1.37931
-1.3816
-1.38292
-1.38325
-1.38245
-1.38052
-1.37749
-1.37329
-1.36781
-1.36102
-1.35286
-1.34337
-1.33265
-1.32075
-1.30769
-1.29343
-1.27783
-1.26083
-1.2425
-1.2229
-1.20205
-1.18009
-1.15706
-1.13288
-1.10753
-1.08095
-1.05305
-1.02379
-0.993155
-0.961117
-0.927816
-0.893446
-0.858129
-0.821973
-0.785016
-0.747201
-0.708502
-0.668913
-0.628388
-0.587007
-0.544856
-0.501929
-0.458264
-0.414014
-0.369324
-0.324273
-0.278943
-0.233361
-0.187527
-0.14148
-0.0952709
-0.0489773
-0.00270165
0.0435456
0.0898093
0.136041
0.182151
0.228061
0.273663
0.318902
0.363745
0.408105
0.451909
0.495121
0.537614
0.579271
0.620043
0.659923
0.698917
0.737039
0.774227
0.810447
0.845734
0.880066
0.913398
0.945679
0.976734
1.00639
1.0346
1.0614
1.08679
1.11085
1.13359
1.15504
1.17534
1.19456
1.21268
1.22967
1.24548
1.26006
1.2734
1.28548
1.29619
1.30554
1.31356
1.32024
1.32561
1.32976
1.33268
1.33446
1.33519
1.33494
1.33373
1.33161
1.32853
1.32451
1.31955
1.31362
1.30665
1.29866
1.28962
1.27956
1.26851
1.25657
1.24384
1.23047
1.21652
1.20206
1.18711
1.1717
1.1558
1.13941
1.12242
1.10478
1.08645
1.06741
1.04769
1.02738
1.0066
0.985478
0.964087
0.942453
0.920587
0.898461
0.876039
0.853323
0.830327
0.80704
0.783467
0.759659
0.735687
0.711612
0.68744
0.663127
0.638574
0.613749
0.588739
0.563677
0.538676
0.51382
0.48913
0.464565
0.440096
0.415679
0.391205
0.366566
0.3417
0.316641
0.291512
0.266425
0.241458
0.216746
0.19239
0.168328
0.144448
0.12062
0.0967159
0.0727386
0.0487777
0.0248919
0.00117134
-0.0223091
-0.0455439
-0.0685242
-0.0912688
-0.113878
-0.136376

## Sheet: yTrcsHiRewardLoSD
0.79114	-0.872679	-1.89738	2.35886	0.417231	1.41892	0.933462	1.35566
0.809227	-0.886612	-1.86266	2.29271	0.359382	1.33882	0.878666	1.30767
0.817439	-0.896244	-1.82721	2.22741	0.305765	1.25618	0.821239	1.25781
0.822415	-0.901186	-1.79204	2.16367	0.255378	1.17333	0.760534	1.20739
0.832233	-0.901494	-1.75673	2.10192	0.206936	1.09295	0.697073	1.15899
0.848814	-0.897867	-1.72054	2.04229	0.157353	1.01736	0.6335	1.11485
0.870302	-0.890992	-1.6832	1.98504	0.104857	0.948337	0.572699	1.0757
0.893772	-0.880606	-1.64472	1.93082	0.0486806	0.886497	0.515365	1.04001
0.915498	-0.866567	-1.60527	1.88013	-0.0113802	0.830558	0.460897	1.00472
0.929614	-0.849451	-1.5653	1.83296	-0.0740395	0.77611	0.408224	0.96724
0.933008	-0.830446	-1.52592	1.78873	-0.13555	0.718199	0.356001	0.925313
0.927435	-0.810994	-1.48933	1.74594	-0.193387	0.655628	0.302665	0.877579
0.917855	-0.791806	-1.45643	1.70217	-0.246789	0.589373	0.247509	0.825034
0.90986	-0.771835	-1.42707	1.65662	-0.296024	0.521147	0.190109	0.772223
0.906115	-0.75067	-1.40054	1.60951	-0.341986	0.453203	0.130326	0.723482
0.903293	-0.729599	-1.37562	1.56125	-0.385835	0.388749	0.0683939	0.68174
0.89604	-0.710623	-1.35027	1.51283	-0.428932	0.329604	0.00471643	0.648851
0.882132	-0.695477	-1.32237	1.46615	-0.472388	0.275887	-0.060621	0.624991
0.861146	-0.684433	-1.29088	1.42181	-0.515863	0.226402	-0.128397	0.608087
0.833951	-0.675038	-1.2556	1.3798	-0.558287	0.179252	-0.198838	0.593023
0.803012	-0.664148	-1.21692	1.33971	-0.598732	0.133052	-0.271592	0.574245
0.773382	-0.651627	-1.17589	1.30087	-0.63686	0.0876423	-0.345978	0.549103
0.752038	-0.638859	-1.13429	1.26299	-0.6737	0.0429242	-0.421249	0.516889
0.744035	-0.627282	-1.09314	1.22689	-0.71253	-0.000324273	-0.496895	0.478371
0.752304	-0.618129	-1.05276	1.19374	-0.754448	-0.0408673	-0.572156	0.436158
0.776964	-0.612183	-1.0132	1.16405	-0.799111	-0.0778734	-0.64558	0.396153
0.814207	-0.60861	-0.974385	1.13769	-0.845705	-0.111316	-0.715527	0.364294
0.855954	-0.607663	-0.93602	1.11406	-0.89263	-0.14224	-0.780874	0.341478
0.895885	-0.609943	-0.897498	1.09217	-0.936704	-0.173269	-0.8419	0.325232
0.928607	-0.615592	-0.858943	1.07041	-0.974878	-0.206508	-0.901552	0.311753
0.949356	-0.624751	-0.82124	1.04597	-1.00561	-0.243626	-0.963751	0.297533
0.955602	-0.638414	-0.78555	1.01768	-1.02872	-0.285568	-1.02882	0.280243
0.949529	-0.65725	-0.752712	0.985632	-1.0452	-0.331361	-1.0951	0.259093
0.942143	-0.681149	-0.722624	0.950476	-1.05692	-0.376738	-1.16071	0.233618
0.946039	-0.709168	-0.693396	0.913618	-1.06628	-0.417367	-1.22393	0.204078
0.960735	-0.73983	-0.662035	0.877699	-1.07541	-0.451487	-1.28345	0.171502
0.978353	-0.772123	-0.627505	0.844803	-1.08567	-0.479013	-1.34006	0.136892
0.9901	-0.806567	-0.589984	0.815432	-1.09803	-0.501038	-1.3935	0.100747
0.989704	-0.843035	-0.550169	0.789075	-1.11304	-0.519725	-1.44321	0.0631478
0.975595	-0.880209	-0.509466	0.764776	-1.13012	-0.538588	-1.48912	0.0226666
0.951776	-0.916204	-0.4703	0.741533	-1.14697	-0.560917	-1.53119	-0.0227764
0.918684	-0.94927	-0.434359	0.718846	-1.1632	-0.588254	-1.56898	-0.0745832
0.876037	-0.979109	-0.402813	0.697484	-1.17964	-0.620865	-1.603	-0.132696
0.825032	-1.00805	-0.376272	0.677668	-1.19752	-0.658046	-1.63262	-0.19518
0.765679	-1.03796	-0.354556	0.659136	-1.21789	-0.698122	-1.65699	-0.258652
0.693308	-1.06842	-0.336703	0.641425	-1.24073	-0.738118	-1.67601	-0.320357
0.603947	-1.09805	-0.320846	0.623878	-1.26419	-0.775876	-1.69002	-0.3778
0.496434	-1.12559	-0.304975	0.605389	-1.28568	-0.811289	-1.69959	-0.429218
0.372355	-1.15044	-0.288776	0.584005	-1.30369	-0.845443	-1.70778	-0.475559
0.235691	-1.17334	-0.272784	0.558323	-1.31747	-0.87973	-1.71615	-0.522699
0.0901255	-1.19625	-0.257573	0.527638	-1.32686	-0.915224	-1.72542	-0.576259
-0.0642167	-1.21949	-0.243803	0.492006	-1.33302	-0.952584	-1.73606	-0.637703
-0.225527	-1.24252	-0.232417	0.452575	-1.33952	-0.991702	-1.74705	-0.706042
-0.387505	-1.26482	-0.222897	0.412034	-1.35064	-1.0313	-1.75438	-0.77914
-0.541524	-1.28559	-0.214342	0.373342	-1.36748	-1.06934	-1.75528	-0.85426
-0.680281	-1.3031	-0.205619	0.337896	-1.38914	-1.10401	-1.74924	-0.928407
-0.803219	-1.31604	-0.195619	0.306113	-1.41396	-1.13503	-1.73729	-0.999879
-0.92212	-1.32406	-0.184341	0.277805	-1.43987	-1.1651	-1.72139	-1.06738
-1.04863	-1.32773	-0.17395	0.251769	-1.46469	-1.19835	-1.70334	-1.13012
-1.18279	-1.32822	-0.166613	0.225385	-1.48818	-1.23601	-1.68401	-1.18806
-1.31897	-1.3266	-0.163107	0.1972	-1.50955	-1.27763	-1.66486	-1.24203
-1.45104	-1.32321	-0.163326	0.166945	-1.52781	-1.3221	-1.64665	-1.29424
-1.57412	-1.31878	-0.166591	0.134975	-1.5424	-1.36751	-1.62959	-1.34682
-1.68622	-1.31394	-0.17179	0.101948	-1.55335	-1.41091	-1.61368	-1.3987
-1.79106	-1.30926	-0.177287	0.0684543	-1.56122	-1.45017	-1.5983	-1.44727
-1.88812	-1.30532	-0.181093	0.0344096	-1.56637	-1.48343	-1.58183	-1.49037
-1.97548	-1.30207	-0.182112	-0.00146147	-1.56767	-1.50938	-1.56419	-1.5272
-2.05258	-1.2987	-0.179936	-0.0396207	-1.56367	-1.52785	-1.54619	-1.55951
-2.11876	-1.29605	-0.174684	-0.0799088	-1.55367	-1.54005	-1.529	-1.59234
-2.17169	-1.29469	-0.167257	-0.121896	-1.53806	-1.54899	-1.51366	-1.62723
-2.21186	-1.29472	-0.159236	-0.164755	-1.51864	-1.55813	-1.50026	-1.66379
-2.2377	-1.29601	-0.150802	-0.207335	-1.49921	-1.5682	-1.48745	-1.70125
-2.24762	-1.29793	-0.142555	-0.248771	-1.48166	-1.57856	-1.47385	-1.73762
-2.24224	-1.29889	-0.13546	-0.287513	-1.46678	-1.58842	-1.45799	-1.76862
-2.22313	-1.29728	-0.130258	-0.321815	-1.45483	-1.5966	-1.43844	-1.7916
-2.19165	-1.29214	-0.127148	-0.350549	-1.44445	-1.60132	-1.41438	-1.80471
-2.15471	-1.28312	-0.125542	-0.374014	-1.43095	-1.60372	-1.38633	-1.80713
-2.11669	-1.27043	-0.125	-0.394627	-1.41034	-1.60457	-1.35703	-1.79975
-2.08053	-1.25498	-0.126183	-0.415184	-1.38198	-1.60444	-1.33013	-1.78446
-2.04877	-1.23878	-0.130132	-0.436276	-1.3474	-1.60405	-1.30685	-1.76406
-2.0196	-1.22442	-0.137562	-0.457489	-1.30913	-1.60311	-1.28695	-1.74317
-1.98263	-1.21244	-0.148458	-0.478343	-1.26947	-1.59903	-1.2695	-1.72341
-1.93148	-1.20213	-0.161921	-0.498017	-1.22944	-1.58953	-1.25284	-1.70471
-1.86619	-1.19251	-0.176546	-0.515327	-1.1893	-1.57339	-1.23393	-1.68665
-1.79058	-1.18245	-0.191413	-0.531167	-1.14989	-1.55032	-1.21022	-1.66757
-1.71007	-1.17061	-0.205723	-0.545656	-1.11221	-1.52107	-1.18089	-1.64301
-1.62836	-1.15711	-0.218729	-0.558517	-1.07699	-1.48717	-1.14646	-1.61093
-1.54405	-1.14213	-0.230635	-0.569759	-1.04422	-1.45096	-1.10834	-1.5724
-1.45436	-1.12597	-0.243488	-0.579015	-1.01324	-1.41619	-1.06814	-1.53038
-1.36037	-1.10903	-0.258715	-0.585147	-0.98511	-1.38464	-1.02731	-1.48834
-1.26524	-1.09134	-0.276223	-0.58834	-0.960801	-1.35684	-0.987237	-1.44794
-1.17221	-1.07189	-0.295094	-0.588026	-0.940753	-1.33268	-0.948309	-1.40722
-1.08325	-1.04942	-0.314223	-0.583425	-0.924773	-1.31064	-0.910296	-1.36409
-0.998458	-1.02307	-0.332945	-0.574277	-0.9119	-1.28682	-0.872747	-1.3176
-0.919834	-0.992493	-0.351887	-0.560712	-0.900374	-1.25901	-0.835013	-1.26734
-0.850363	-0.958026	-0.372497	-0.542702	-0.888118	-1.22713	-0.795846	-1.21357
-0.792402	-0.92059	-0.394599	-0.520971	-0.872946	-1.1923	-0.754703	-1.15725
-0.746696	-0.881907	-0.417082	-0.496395	-0.85276	-1.15606	-0.712748	-1.10037
-0.711517	-0.84485	-0.438792	-0.470173	-0.826247	-1.11952	-0.672081	-1.04653
-0.681903	-0.810907	-0.458843	-0.443727	-0.794145	-1.08275	-0.634586	-0.998367
-0.651868	-0.780549	-0.476666	-0.417497	-0.760509	-1.04527	-0.600766	-0.957446
-0.618537	-0.753617	-0.491744	-0.3896	-0.729285	-1.0062	-0.568971	-0.924039
-0.580621	-0.728807	-0.503484	-0.358716	-0.701349	-0.964499	-0.537077	-0.896301
-0.53756	-0.702747	-0.51161	-0.325732	-0.675981	-0.919559	-0.503701	-0.869297
-0.491204	-0.672418	-0.516318	-0.292685	-0.651998	-0.871682	-0.467779	-0.838123
-0.447504	-0.637239	-0.518153	-0.261711	-0.627824	-0.822997	-0.428761	-0.800296
-0.409473	-0.598177	-0.517897	-0.233574	-0.601324	-0.777635	-0.387334	-0.754965
-0.376748	-0.55686	-0.516701	-0.206516	-0.571802	-0.737189	-0.346308	-0.702667
-0.347237	-0.514909	-0.514968	-0.178843	-0.539412	-0.701493	-0.308751	-0.645706
-0.318349	-0.47372	-0.5128	-0.151022	-0.504937	-0.669549	-0.276034	-0.589331
-0.288718	-0.434203	-0.51038	-0.124452	-0.469491	-0.639306	-0.248329	-0.538852
-0.260285	-0.396392	-0.507539	-0.100272	-0.433604	-0.607018	-0.224882	-0.495118
-0.237158	-0.359692	-0.50362	-0.0789687	-0.395984	-0.569354	-0.20409	-0.456169
-0.220167	-0.323318	-0.499598	-0.0602309	-0.354322	-0.524504	-0.183215	-0.419095
-0.207993	-0.286709	-0.495985	-0.0434539	-0.308145	-0.471955	-0.159366	-0.381089
-0.198603	-0.249833	-0.492865	-0.0282848	-0.258267	-0.41246	-0.131209	-0.339503
-0.189589	-0.213653	-0.490225	-0.0142416	-0.206022	-0.347894	-0.0985783	-0.292817
-0.177475	-0.1792	-0.487498	-0.000702964	-0.152896	-0.281118	-0.0621603	-0.241479
-0.157288	-0.147378	-0.482897	0.0122784	-0.100416	-0.214349	-0.0234743	-0.187458
-0.126545	-0.118639	-0.474745	0.0229955	-0.0505383	-0.148688	0.0147546	-0.133199
-0.0850651	-0.0924971	-0.462438	0.02994	-0.00500229	-0.0846912	0.0502305	-0.0800764
-0.0342662	-0.0671836	-0.446223	0.0333738	0.0349604	-0.0225519	0.0825448	-0.027189
0.0229178	-0.0405343	-0.426913	0.0347252	0.0689274	0.0384051	0.112498	0.027445
0.0817752	-0.0107101	-0.405571	0.0356661	0.0978798	0.100464	0.141376	0.0852136
0.138053	0.023771	-0.383651	0.0372645	0.12459	0.164649	0.170435	0.147079
0.189815	0.0635573	-0.363366	0.0390796	0.151238	0.229676	0.200981	0.21332
0.236481	0.107723	-0.345249	0.0404197	0.178645	0.293119	0.233962	0.283049
0.278253	0.152911	-0.328746	0.0417644	0.207109	0.352746	0.268708	0.354026
0.316721	0.195492	-0.313062	0.0440634	0.236743	0.407962	0.30348	0.423591
0.355643	0.234092	-0.297174	0.0481712	0.267031	0.461282	0.336495	0.488709
0.396518	0.268704	-0.27991	0.0545349	0.296296	0.51666	0.366965	0.546414
0.438211	0.300105	-0.261722	0.0630028	0.324073	0.575365	0.395821	0.595041
0.478463	0.329944	-0.242789	0.073283	0.351291	0.637197	0.424771	0.635645
0.515284	0.361505	-0.2231	0.0859212	0.379516	0.70144	0.454917	0.673644
0.548216	0.397996	-0.202702	0.101625	0.410175	0.76642	0.487086	0.715365
0.579655	0.439894	-0.181354	0.120711	0.443465	0.82893	0.521729	0.762877
0.614301	0.485814	-0.15821	0.142917	0.477149	0.886599	0.558282	0.815812
0.654707	0.533619	-0.132516	0.167555	0.507958	0.937781	0.594605	0.872688
0.701901	0.581388	-0.103161	0.193672	0.535018	0.981627	0.628557	0.930724
0.755719	0.627998	-0.0691484	0.220554	0.558906	1.01841	0.658581	0.984982
0.813909	0.673215	-0.0302197	0.247501	0.580699	1.0495	0.683651	1.03189
0.870545	0.71683	0.0129886	0.273758	0.601956	1.07741	0.703603	1.0703
0.918827	0.758855	0.0584904	0.299318	0.625287	1.10499	0.719478	1.10097
0.955665	0.799595	0.102745	0.3259	0.653547	1.13307	0.734128	1.12599
0.980753	0.839384	0.144422	0.355095	0.687787	1.16152	0.751018	1.14769
0.995763	0.878623	0.183565	0.386336	0.727605	1.19006	0.771401	1.16821
1.0043	0.917565	0.220724	0.417841	0.77174	1.21784	0.795162	1.18986
1.01331	0.954982	0.257412	0.447761	0.818509	1.24308	0.821507	1.21278
1.03077	0.988981	0.297205	0.475322	0.866411	1.26644	0.848846	1.23576
1.05851	1.01819	0.343151	0.502016	0.915091	1.28877	0.87424	1.25744
1.09436	1.0425	0.39567	0.530236	0.963676	1.31094	0.895514	1.27668
1.13473	1.06349	0.453354	0.559777	1.01092	1.33384	0.912198	1.29251
1.17551	1.08368	0.513941	0.589078	1.05581	1.35729	0.925035	1.30589
1.21234	1.10485	0.575499	0.616664	1.09816	1.37896	0.93545	1.31869
1.24404	1.12839	0.637344	0.641441	1.13911	1.39674	0.94481	1.33329
1.27056	1.15524	0.699412	0.663029	1.17903	1.40953	0.954091	1.35177
1.29278	1.18464	0.761171	0.682176	1.21679	1.41692	0.964071	1.37412
1.31222	1.21289	0.821947	0.698427	1.25081	1.41935	0.974609	1.39693
1.32986	1.23661	0.881235	0.710992	1.28002	1.41797	0.984964	1.41681
1.34541	1.25473	0.939023	0.719536	1.30457	1.41503	0.994377	1.4316
1.35801	1.26764	0.996199	0.723971	1.32662	1.41389	1.00239	1.43991
1.36471	1.27669	1.05301	0.724107	1.35003	1.41589	1.00882	1.44146
1.36194	1.28367	1.10801	0.720777	1.37609	1.42109	1.01414	1.43769
1.34766	1.29099	1.15912	0.71415	1.40469	1.42901	1.01972	1.43319
1.32257	1.3015	1.20487	0.704314	1.43525	1.43821	1.02742	1.43414
1.29128	1.31616	1.24528	0.691773	1.46621	1.44612	1.03872	1.44235
1.26157	1.33449	1.28244	0.676841	1.49427	1.4522	1.05362	1.45681
1.23807	1.35537	1.31943	0.659154	1.51751	1.45597	1.06989	1.47533
1.22334	1.37721	1.35807	0.640004	1.53499	1.457	1.08501	1.49484
1.21826	1.39819	1.39948	0.620098	1.54662	1.45525	1.09755	1.51145
1.21976	1.41786	1.44426	0.599764	1.55318	1.45092	1.10669	1.52368
1.21782	1.43602	1.49136	0.579436	1.55585	1.44404	1.11225	1.52983
1.20301	1.45267	1.53706	0.558797	1.55579	1.43431	1.11518	1.52849
1.17237	1.46809	1.5785	0.536124	1.55417	1.42115	1.1186	1.51948
1.12729	1.48257	1.61454	0.511148	1.55123	1.4041	1.12617	1.5038
1.0717	1.49638	1.64518	0.483921	1.54693	1.38324	1.13895	1.48365
1.01073	1.50965	1.67139	0.454688	1.54138	1.35915	1.15621	1.46144
0.950775	1.52123	1.69469	0.423938	1.5345	1.33301	1.17637	1.43677
0.898272	1.52944	1.71748	0.391832	1.52608	1.30732	1.19746	1.40807
0.855359	1.53307	1.74307	0.357666	1.51818	1.28362	1.21726	1.37425
0.821012	1.53211	1.77202	0.321307	1.51209	1.26279	1.23443	1.33474
0.792598	1.52841	1.8031	0.28265	1.50836	1.2453	1.24786	1.28922
0.766612	1.52519	1.83459	0.241705	1.5072	1.2302	1.25685	1.23989
0.738613	1.52383	1.86478	0.198774	1.50759	1.21416	1.26152	1.18917
0.706725	1.52478	1.89289	0.154271	1.50639	1.19469	1.26272	1.13975
0.67188	1.52805	1.92112	0.108633	1.50104	1.1712	1.2624	1.09407
0.636624	1.53243	1.94901	0.0632154	1.49012	1.14423	1.26276	1.05185
0.603673	1.53464	1.97469	0.018583	1.47309	1.1148	1.2636	1.00737
0.574249	1.53243	1.99663	-0.025242	1.45037	1.08411	1.26341	0.955075
0.547051	1.5248	2.01386	-0.0683119	1.4233	1.05307	1.26076	0.893962
0.518981	1.5117	2.02649	-0.111133	1.39445	1.02177	1.25468	0.825768
0.486494	1.49392	2.03684	-0.155002	1.36678	0.990272	1.24459	0.753345
0.445962	1.47275	2.04342	-0.200435	1.34104	0.958628	1.23117	0.679591
0.395104	1.44969	2.043	-0.247468	1.31674	0.926923	1.21568	0.606865
0.335041	1.42626	2.03327	-0.295833	1.29313	0.895334	1.19993	0.537202
0.272291	1.40305	2.01348	-0.345089	1.2691	0.864737	1.18574	0.472312
0.214744	1.38015	1.98467	-0.39503	1.243	0.837559	1.17339	0.413276
0.166685	1.35753	1.95032	-0.446335	1.21504	0.81464	1.16014	0.360255
0.13009	1.33475	1.9117	-0.500124	1.18586	0.79555	1.14321	0.312175
0.104887	1.31067	1.8695	-0.556466	1.15635	0.779295	1.12176	0.266374
0.087654	1.28563	1.82482	-0.614682	1.12742	0.764378	1.09611	0.221052
0.0693187	1.26049	1.77733	-0.673856	1.09906	0.748733	1.06731	0.176501
0.0404946	1.23632	1.72346	-0.733119	1.06898	0.730566	1.03682	0.133805
-0.00181864	1.21406	1.66277	-0.79198	1.03386	0.708319	1.00651	0.0938169
-0.0564358	1.19361	1.59564	-0.850084	0.992862	0.680846	0.978861	0.0569237
-0.11997	1.17299	1.52307	-0.906591	0.946923	0.647756	0.955421	0.0228054
-0.1876	1.14999	1.44686	-0.960577	0.897717	0.609917	0.936883	-0.0111202
-0.252902	1.12367	1.36779	-1.01142	0.847185	0.569948	0.92308	-0.0466487
-0.311322	1.09388	1.28371	-1.05926	0.797284	0.530282	0.912706	-0.0849882
-0.361429	1.06099	1.19393	-1.1053	0.749933	0.491163	0.902886	-0.126836
-0.40403	1.02601	1.09941	-1.15075	0.70702	0.451823	0.891214	-0.171209
-0.441273	0.991024	1.00206	-1.19565	0.670027	0.411507	0.876834	-0.213891
-0.475695	0.9584	0.904104	-1.23954	0.639521	0.369505	0.859791	-0.250442
-0.510433	0.929034	0.806481	-1.28213	0.614554	0.325033	0.840636	-0.27918
-0.54782	0.902832	0.706958	-1.32324	0.592149	0.278941	0.820435	-0.300329
-0.585816	0.879189	0.603514	-1.36295	0.569806	0.232363	0.801174	-0.315368
-0.620032	0.856991	0.49727	-1.40248	0.547039	0.186554	0.784303	-0.326695
-0.646593	0.834868	0.391005	-1.44238	0.524212	0.142623	0.769351	-0.338007
-0.664178	0.812912	0.287625	-1.48277	0.501767	0.100348	0.754711	-0.353492
-0.675425	0.790648	0.188515	-1.52373	0.480399	0.0564854	0.738689	-0.374768
-0.686067	0.767201	0.0920533	-1.56473	0.461134	0.00678417	0.720416	-0.401637
-0.699879	0.741892	-0.00399571	-1.60387	0.442936	-0.0495522	0.700412	-0.432947
-0.719602	0.714466	-0.0986725	-1.63949	0.424859	-0.111052	0.679921	-0.466599
-0.746809	0.68531	-0.189716	-1.67132	0.406091	-0.175422	0.65995	-0.499063
-0.779597	0.654827	-0.275387	-1.70008	0.385923	-0.240295	0.641455	-0.528036
-0.809729	0.622154	-0.355146	-1.72686	0.36475	-0.303524	0.625121	-0.553626
-0.828593	0.586008	-0.430492	-1.75267	0.345277	-0.363206	0.610619	-0.577338
-0.832587	0.545572	-0.504922	-1.77785	0.330344	-0.417744	0.595775	-0.600984
-0.821613	0.500913	-0.578464	-1.80254	0.321063	-0.466182	0.577996	-0.625787
-0.798196	0.453353	-0.649473	-1.82712	0.317312	-0.508512	0.556064	-0.65238
-0.766939	0.405329	-0.716661	-1.85212	0.318159	-0.545848	0.52973	-0.681011
-0.734708	0.357845	-0.778817	-1.87802	0.322031	-0.580669	0.499503	-0.70974
-0.708372	0.311191	-0.83422	-1.90499	0.326625	-0.615079	0.466703	-0.735378
-0.691926	0.265506	-0.883245	-1.93311	0.329334	-0.649252	0.433775	-0.755301
-0.687112	0.220048	-0.926399	-1.96364	0.328834	-0.682556	0.403376	-0.769074
-0.693537	0.172311	-0.964724	-1.99707	0.324702	-0.714436	0.376835	-0.779766
-0.70788	0.120735	-0.999872	-2.03309	0.317068	-0.74434	0.354515	-0.792042
-0.722071	0.0651497	-1.03245	-2.07105	0.307032	-0.77161	0.336023	-0.808297
-0.72897	0.00628415	-1.06028	-2.10996	0.29674	-0.79766	0.320055	-0.829571
-0.728326	-0.0546345	-1.08232	-2.14858	0.286486	-0.823911	0.304214	-0.855861
-0.723855	-0.116649	-1.09888	-2.18592	0.276325	-0.851683	0.287009	-0.885286
-0.720133	-0.179959	-1.11125	-2.22087	0.266398	-0.882009	0.267792	-0.912835
-0.720762	-0.245184	-1.12133	-2.25239	0.256812	-0.914435	0.246402	-0.933369
-0.728061	-0.31189	-1.13035	-2.27994	0.247773	-0.945652	0.223097	-0.944316
-0.74224	-0.379025	-1.13822	-2.30392	0.240067	-0.972164	0.198522	-0.945159
-0.76106	-0.445505	-1.14707	-2.32631	0.235499	-0.992548	0.173835	-0.937251

## Sheet: yTrcsHiRewardHiSD
-0.332274	-0.209576	-0.00882246	0.944548	-0.328938	0.273035	-0.618509	-0.0541813	-0.574466	0.0784558	0.484587	-0.170762	-0.131508	-0.314833	0.269153	0.474083	0.0944751	-0.344949	-0.196108	-0.304808	1.62465	0.485244	0.226507	1.28691	-0.609744	-0.155319	0.0480389	0.634843	-0.78036	-0.293549	1.38166	0.421059	1.07682	-0.065742	0.0134067	-0.584042	0.449975	0.242376	-0.717398	-0.147781	-0.392925	0.234521	1.01137	-0.598756	0.414196	-0.429095	-0.0169515	0.592894	0.177826	1.00844
-0.358888	-0.227489	-0.00102015	0.904522	-0.310015	0.235057	-0.63742	-0.076808	-0.585007	0.0543384	0.423386	-0.222852	-0.144567	-0.297037	0.240315	0.415171	0.076531	-0.364734	-0.216544	-0.318475	1.56647	0.457769	0.197835	1.25207	-0.62828	-0.181264	0.0339298	0.593994	-0.796231	-0.309049	1.34169	0.406459	1.05236	-0.0903762	-0.0136079	-0.590861	0.400411	0.16429	-0.723512	-0.163721	-0.402338	0.215169	0.97129	-0.609455	0.385232	-0.435614	-0.0527753	0.558805	0.158832	0.967219
-0.383139	-0.244429	0.00690545	0.864067	-0.291396	0.198233	-0.658729	-0.099552	-0.597007	0.0307407	0.362906	-0.270165	-0.158664	-0.279427	0.21199	0.358829	0.056795	-0.383639	-0.236401	-0.332257	1.50562	0.430315	0.167638	1.21961	-0.646337	-0.207422	0.0214347	0.554036	-0.81172	-0.325772	1.30145	0.392785	1.02987	-0.113791	-0.0413089	-0.596902	0.352649	0.089112	-0.728928	-0.178312	-0.411664	0.196112	0.926974	-0.621221	0.355685	-0.442255	-0.08847	0.526271	0.136993	0.927633
-0.405012	-0.261652	0.0139743	0.821351	-0.273754	0.161443	-0.682489	-0.12257	-0.610498	0.00724176	0.30347	-0.312863	-0.173625	-0.262466	0.184604	0.306377	0.0350627	-0.401459	-0.256218	-0.347007	1.44245	0.40176	0.135481	1.1898	-0.664142	-0.234868	0.00991705	0.514422	-0.825251	-0.34367	1.26031	0.380026	1.00694	-0.133978	-0.0693321	-0.602695	0.307379	0.018602	-0.732944	-0.191871	-0.420483	0.175208	0.877539	-0.634269	0.324592	-0.449721	-0.123136	0.494109	0.111456	0.889031
-0.424759	-0.2806	0.0194645	0.775848	-0.257515	0.123403	-0.708317	-0.145764	-0.624901	-0.016469	0.244867	-0.352042	-0.189036	-0.247028	0.15818	0.257959	0.0114746	-0.418334	-0.276334	-0.362923	1.37776	0.3717	0.101392	1.16186	-0.682224	-0.263978	-0.0014497	0.474695	-0.836108	-0.362057	1.21852	0.367681	0.981529	-0.149996	-0.0972502	-0.608898	0.264888	-0.0460553	-0.735132	-0.204891	-0.429071	0.151716	0.823278	-0.648564	0.291554	-0.458259	-0.1563	0.461275	0.081786	0.848058
-0.44294	-0.301757	0.0235527	0.727869	-0.242832	0.0837983	-0.735273	-0.168596	-0.638532	-0.0406247	0.186647	-0.39038	-0.204566	-0.234007	0.132021	0.211696	-0.0134017	-0.43495	-0.296843	-0.379733	1.31262	0.340149	0.0657219	1.13463	-0.700987	-0.294637	-0.0137089	0.434595	-0.844807	-0.380066	1.1765	0.354438	0.952457	-0.162129	-0.124654	-0.616042	0.224894	-0.104503	-0.735684	-0.218057	-0.438084	0.125795	0.765258	-0.663718	0.257132	-0.46778	-0.187965	0.427028	0.048247	0.802016
-0.46	-0.324966	0.0259708	0.678181	-0.229544	0.0428634	-0.761606	-0.190982	-0.649865	-0.065426	0.128318	-0.431218	-0.220698	-0.22376	0.105222	0.164506	-0.0382928	-0.452444	-0.317686	-0.396986	1.24749	0.307375	0.0290679	1.10705	-0.720157	-0.326432	-0.0274992	0.394185	-0.852465	-0.39726	1.1347	0.339333	0.919429	-0.170719	-0.151448	-0.624175	0.186268	-0.157375	-0.73554	-0.231933	-0.448124	0.0980969	0.704925	-0.678847	0.222591	-0.477989	-0.218479	0.391146	0.0116236	0.750236
-0.475926	-0.349714	0.0263735	0.627756	-0.217222	0.0010764	-0.786254	-0.213162	-0.658411	-0.090475	0.0697542	-0.474817	-0.238278	-0.215979	0.0774576	0.115568	-0.0617844	-0.471617	-0.338739	-0.414198	1.18153	0.273892	-0.00773099	1.07832	-0.739096	-0.358774	-0.0429642	0.35392	-0.860172	-0.413455	1.09357	0.32193	0.883204	-0.1767	-0.177753	-0.633001	0.147058	-0.205966	-0.735644	-0.24677	-0.459432	0.0696775	0.644156	-0.693006	0.188577	-0.488481	-0.248383	0.353717	-0.0268774	0.693409
-0.491484	-0.375246	0.0247444	0.577808	-0.204825	-0.0409495	-0.808983	-0.23551	-0.664394	-0.115016	0.0114825	-0.519617	-0.257939	-0.209502	0.0487447	0.0652965	-0.0835096	-0.492953	-0.359847	-0.43083	1.11417	0.240581	-0.0437273	1.04818	-0.757208	-0.390885	-0.0598311	0.314471	-0.8691	-0.428677	1.05304	0.302213	0.845082	-0.181794	-0.203775	-0.642098	0.106441	-0.252333	-0.736962	-0.26258	-0.471762	0.0423028	0.584922	-0.705659	0.155441	-0.498697	-0.278041	0.315175	-0.0657771	0.633061
-0.507416	-0.400476	0.021216	0.529543	-0.190987	-0.0824378	-0.830063	-0.258378	-0.668489	-0.138388	-0.0459257	-0.563736	-0.279788	-0.202694	0.0192833	0.0144237	-0.103771	-0.516546	-0.380871	-0.446714	1.04499	0.208344	-0.0781583	1.01694	-0.77427	-0.422199	-0.0775557	0.276388	-0.880111	-0.443288	1.01221	0.280573	0.806887	-0.187845	-0.229728	-0.651123	0.0642851	-0.299476	-0.740418	-0.279194	-0.484606	0.0176915	0.527566	-0.716598	0.123359	-0.508236	-0.307424	0.276155	-0.104756	0.570788
-0.524343	-0.424231	0.0160566	0.483407	-0.176057	-0.122574	-0.850039	-0.281806	-0.671555	-0.160405	-0.101817	-0.605515	-0.303208	-0.195021	-0.0105169	-0.0357917	-0.123139	-0.541848	-0.402066	-0.462079	0.973613	0.177484	-0.110477	0.985405	-0.79074	-0.452546	-0.0956507	0.239716	-0.893004	-0.458206	0.970462	0.257609	0.771175	-0.195421	-0.255787	-0.659912	0.0207764	-0.348433	-0.746496	-0.296303	-0.497358	-0.00383793	0.471437	-0.725944	0.0919173	-0.517165	-0.336587	0.237024	-0.144095	0.507728
-0.542725	-0.445968	0.0101132	0.439242	-0.161395	-0.160754	-0.869469	-0.305244	-0.674534	-0.181673	-0.155578	-0.643514	-0.327009	-0.186627	-0.0398512	-0.0829599	-0.142325	-0.567437	-0.423745	-0.477407	0.899975	0.147885	-0.140502	0.954455	-0.807543	-0.482051	-0.113817	0.203667	-0.906224	-0.474325	0.927285	0.234113	0.739098	-0.202983	-0.281882	-0.668523	-0.0232709	-0.399068	-0.754858	-0.313393	-0.509315	-0.0229744	0.415676	-0.734185	0.0596909	-0.525858	-0.365392	0.197655	-0.184119	0.445179
-0.562306	-0.465652	0.00306735	0.39653	-0.148378	-0.196666	-0.88923	-0.328079	-0.678258	-0.203201	-0.206927	-0.677615	-0.350424	-0.177975	-0.0678368	-0.125319	-0.162235	-0.591918	-0.446198	-0.493188	0.824389	0.119208	-0.168681	0.924466	-0.824997	-0.511	-0.131736	0.167074	-0.918794	-0.492025	0.88224	0.211167	0.710542	-0.209818	-0.30789	-0.677178	-0.0659616	-0.450891	-0.764055	-0.330045	-0.519926	-0.0408685	0.359358	-0.742328	0.0255144	-0.534753	-0.393583	0.157969	-0.225327	0.384187
-0.581447	-0.48361	-0.0059499	0.354566	-0.137792	-0.230384	-0.910616	-0.350053	-0.683137	-0.22547	-0.256184	-0.70827	-0.372888	-0.169871	-0.0941322	-0.162189	-0.183395	-0.614391	-0.46959	-0.5096	0.747539	0.0909865	-0.196382	0.895097	-0.843073	-0.539729	-0.149644	0.12921	-0.929247	-0.511305	0.835155	0.189099	0.68441	-0.215552	-0.333682	-0.686195	-0.105972	-0.50268	-0.77263	-0.34635	-0.529267	-0.0585965	0.300778	-0.751404	-0.0114053	-0.54412	-0.420991	0.117382	-0.268814	0.325468
-0.598695	-0.500481	-0.0175466	0.31235	-0.129428	-0.262403	-0.932939	-0.371116	-0.689252	-0.24866	-0.304905	-0.73657	-0.39403	-0.16349	-0.118819	-0.193875	-0.205843	-0.634328	-0.493783	-0.52637	0.670656	0.0627004	-0.224797	0.865991	-0.861603	-0.568768	-0.168124	0.0896289	-0.935891	-0.531871	0.786288	0.167738	0.658926	-0.219823	-0.359161	-0.69583	-0.142779	-0.551688	-0.779746	-0.362696	-0.538504	-0.0767451	0.238378	-0.76178	-0.0515234	-0.553946	-0.447597	0.0750542	-0.314872	0.269309
-0.613981	-0.51731	-0.0319818	0.269001	-0.122224	-0.293801	-0.954347	-0.391351	-0.696443	-0.272748	-0.355785	-0.76396	-0.414211	-0.159246	-0.142261	-0.221534	-0.229261	-0.651677	-0.518202	-0.543167	0.594731	0.0342102	-0.254271	0.836199	-0.880196	-0.59876	-0.187706	0.0481849	-0.937779	-0.553218	0.736638	0.146741	0.631479	-0.222548	-0.384367	-0.706099	-0.176473	-0.596525	-0.784947	-0.37948	-0.548918	-0.0952677	0.173405	-0.773382	-0.0947675	-0.564059	-0.47368	0.0304166	-0.362734	0.215151
-0.628018	-0.534914	-0.049223	0.224613	-0.115843	-0.325798	-0.973132	-0.411042	-0.704293	-0.297337	-0.409405	-0.791069	-0.435223	-0.157586	-0.164981	-0.246466	-0.253175	-0.667068	-0.542189	-0.559426	0.520584	0.00542953	-0.284695	0.804411	-0.898085	-0.629362	-0.208603	0.0053504	-0.935293	-0.574613	0.687701	0.125589	0.599551	-0.223862	-0.409661	-0.716714	-0.207673	-0.637658	-0.78822	-0.396927	-0.56102	-0.114343	0.10879	-0.785876	-0.140491	-0.574153	-0.500151	-0.0165211	-0.410938	0.161375
-0.641718	-0.553468	-0.0682602	0.179884	-0.110169	-0.358733	-0.988524	-0.430846	-0.711945	-0.321371	-0.465	-0.817004	-0.45884	-0.158712	-0.187604	-0.269579	-0.27723	-0.682233	-0.565197	-0.574455	0.448738	-0.0236984	-0.315771	0.769643	-0.914607	-0.659643	-0.230516	-0.0374222	-0.930535	-0.595324	0.639779	0.103588	0.562114	-0.223519	-0.43569	-0.7273	-0.237198	-0.676708	-0.790201	-0.414961	-0.574846	-0.134182	0.0473463	-0.798729	-0.187407	-0.58381	-0.527392	-0.0650749	-0.457925	0.107574
-0.655798	-0.572766	-0.0883582	0.135593	-0.105016	-0.392439	-1.00122	-0.451568	-0.718836	-0.343748	-0.521453	-0.841403	-0.485473	-0.162241	-0.210608	-0.291993	-0.301432	-0.699057	-0.586774	-0.587781	0.378782	-0.0531566	-0.347007	0.731892	-0.929235	-0.688705	-0.252658	-0.0787027	-0.926146	-0.615036	0.592504	0.0807946	0.519562	-0.220978	-0.4627	-0.737315	-0.266019	-0.715602	-0.792484	-0.433211	-0.59012	-0.154833	-0.00981007	-0.811035	-0.234041	-0.592682	-0.55544	-0.114172	-0.503227	0.0539092
-0.670613	-0.592458	-0.108811	0.092258	-0.100569	-0.42658	-1.01298	-0.473437	-0.725267	-0.36389	-0.577436	-0.863357	-0.514653	-0.167662	-0.234306	-0.314494	-0.32613	-0.717949	-0.606709	-0.599485	0.30851	-0.0828959	-0.377569	0.692795	-0.941666	-0.716131	-0.27449	-0.117799	-0.923627	-0.633743	0.545391	0.0572563	0.473424	-0.217492	-0.490652	-0.74615	-0.295428	-0.755357	-0.796572	-0.451375	-0.606234	-0.176233	-0.064366	-0.821937	-0.279631	-0.600756	-0.584178	-0.162804	-0.548841	0.000667567
-0.686325	-0.612146	-0.128902	0.0499765	-0.0977455	-0.460626	-1.02465	-0.496296	-0.732008	-0.381671	-0.63138	-0.881707	-0.54547	-0.174466	-0.258877	-0.337649	-0.35163	-0.738411	-0.625273	-0.610473	0.235635	-0.112938	-0.406984	0.654698	-0.951973	-0.742337	-0.295574	-0.154514	-0.923783	-0.65164	0.497823	0.0330539	0.425556	-0.215363	-0.51935	-0.753408	-0.325658	-0.795895	-0.803031	-0.469174	-0.62207	-0.19817	-0.119064	-0.831396	-0.32383	-0.60854	-0.613194	-0.209971	-0.59743	-0.0518631
-0.702931	-0.631389	-0.148746	0.00832958	-0.096899	-0.493686	-1.03662	-0.519838	-0.739804	-0.397393	-0.682648	-0.895885	-0.576939	-0.181082	-0.284337	-0.361846	-0.378165	-0.759609	-0.643533	-0.621885	0.159841	-0.1436	-0.435442	0.618542	-0.960585	-0.768292	-0.315597	-0.189067	-0.926751	-0.669113	0.449068	0.00839282	0.378395	-0.216554	-0.548444	-0.759209	-0.356292	-0.83811	-0.811749	-0.486391	-0.636402	-0.220535	-0.175227	-0.839942	-0.366573	-0.616565	-0.641586	-0.254966	-0.649039	-0.103649
-0.720234	-0.650162	-0.170175	-0.0332219	-0.0986356	-0.525359	-1.04914	-0.543662	-0.748974	-0.411704	-0.730599	-0.906109	-0.608166	-0.187015	-0.310465	-0.386759	-0.405797	-0.780592	-0.662704	-0.634386	0.0819655	-0.175128	-0.463542	0.584477	-0.968385	-0.794354	-0.334786	-0.222151	-0.931496	-0.686848	0.399299	-0.0166589	0.335771	-0.221604	-0.577381	-0.764471	-0.386792	-0.880826	-0.822118	-0.50312	-0.648718	-0.243988	-0.233457	-0.848287	-0.408406	-0.625254	-0.668674	-0.298064	-0.702253	-0.155193
-0.737938	-0.668817	-0.194517	-0.0753241	-0.103553	-0.555784	-1.06172	-0.567379	-0.759213	-0.425555	-0.774833	-0.913347	-0.638351	-0.192536	-0.336611	-0.410768	-0.434323	-0.800146	-0.683134	-0.64835	0.00319582	-0.20765	-0.491957	0.552247	-0.976581	-0.820607	-0.354261	-0.255148	-0.935044	-0.705372	0.348416	-0.0423011	0.298405	-0.22915	-0.605647	-0.770282	-0.416559	-0.921529	-0.833283	-0.520008	-0.659036	-0.269518	-0.293825	-0.856983	-0.450878	-0.634968	-0.693987	-0.341297	-0.755429	-0.207556
-0.755864	-0.687909	-0.221974	-0.118507	-0.111741	-0.585459	-1.07257	-0.591035	-0.769928	-0.439861	-0.815518	-0.919631	-0.666945	-0.198179	-0.362199	-0.433352	-0.463196	-0.817338	-0.704661	-0.663857	-0.0753264	-0.241158	-0.521009	0.52088	-0.98563	-0.847062	-0.37489	-0.289402	-0.9346	-0.724634	0.29621	-0.0684499	0.26467	-0.237982	-0.632872	-0.777143	-0.444702	-0.95808	-0.844062	-0.53769	-0.667738	-0.297827	-0.355357	-0.866293	-0.494915	-0.645896	-0.717264	-0.38678	-0.807247	-0.261575
-0.774342	-0.707923	-0.252041	-0.162727	-0.122848	-0.615011	-1.08032	-0.614485	-0.780503	-0.455279	-0.853175	-0.926829	-0.693688	-0.204782	-0.38742	-0.455256	-0.491598	-0.832141	-0.726922	-0.680452	-0.15296	-0.275438	-0.550293	0.488279	-0.995529	-0.873415	-0.397187	-0.325323	-0.929148	-0.744226	0.242663	-0.0954723	0.232073	-0.247306	-0.658831	-0.785207	-0.470956	-0.989745	-0.853072	-0.55651	-0.675494	-0.328929	-0.415701	-0.87634	-0.540493	-0.657846	-0.738571	-0.435079	-0.857368	-0.317901
-0.794328	-0.72893	-0.283793	-0.2072	-0.136122	-0.644772	-1.08391	-0.637471	-0.790253	-0.472251	-0.888687	-0.936671	-0.718641	-0.213741	-0.412878	-0.477813	-0.518739	-0.845231	-0.749364	-0.696772	-0.230149	-0.310001	-0.579074	0.452879	-1.00608	-0.898813	-0.421436	-0.362731	-0.91899	-0.763663	0.187754	-0.123959	0.198131	-0.256304	-0.683503	-0.794386	-0.495872	-1.01784	-0.859855	-0.576608	-0.683192	-0.361839	-0.472883	-0.886988	-0.587053	-0.669992	-0.758305	-0.485823	-0.906531	-0.376874
-0.815983	-0.750439	-0.316413	-0.251398	-0.150013	-0.674564	-1.08267	-0.659803	-0.798648	-0.4909	-0.923461	-0.95031	-0.742243	-0.225771	-0.439157	-0.502278	-0.543935	-0.8576	-0.771088	-0.711437	-0.306465	-0.344251	-0.60702	0.41375	-1.01678	-0.922708	-0.447609	-0.401171	-0.905398	-0.782626	0.130995	-0.154308	0.160601	-0.264413	-0.70715	-0.804216	-0.520524	-1.04514	-0.864692	-0.597915	-0.691291	-0.394985	-0.524697	-0.897868	-0.633838	-0.681384	-0.777237	-0.538179	-0.953675	-0.438031
-0.838893	-0.771941	-0.349656	-0.294385	-0.16365	-0.704274	-1.0768	-0.681406	-0.80579	-0.510824	-0.957426	-0.967146	-0.765514	-0.24113	-0.466549	-0.52897	-0.566837	-0.869969	-0.791405	-0.723956	-0.381077	-0.377719	-0.63403	0.370523	-1.02653	-0.944557	-0.475303	-0.439993	-0.89008	-0.801129	0.0716651	-0.186536	0.118278	-0.271863	-0.730415	-0.8136	-0.546019	-1.07323	-0.8683	-0.620113	-0.700166	-0.427526	-0.569232	-0.908566	-0.680345	-0.691719	-0.796254	-0.591084	-0.996972	-0.499811
-0.862429	-0.792723	-0.383179	-0.335027	-0.176533	-0.733531	-1.06723	-0.70225	-0.812915	-0.53067	-0.989829	-0.983531	-0.789336	-0.259523	-0.494879	-0.556685	-0.5878	-0.882518	-0.810224	-0.734444	-0.453402	-0.410033	-0.660149	0.323521	-1.03471	-0.963945	-0.503611	-0.478431	-0.87494	-0.819445	0.00972277	-0.220088	0.0708288	-0.280129	-0.753883	-0.821469	-0.572727	-1.10305	-0.871563	-0.642623	-0.710113	-0.458951	-0.60595	-0.918883	-0.726823	-0.701078	-0.815691	-0.643335	-1.03513	-0.560989
-0.885976	-0.81196	-0.416296	-0.372611	-0.188354	-0.761807	-1.05539	-0.72212	-0.821409	-0.549062	-1.02011	-0.995965	-0.813548	-0.28007	-0.523601	-0.584046	-0.608301	-0.895413	-0.827876	-0.7434	-0.523242	-0.440996	-0.685707	0.273655	-1.04127	-0.980872	-0.531495	-0.516392	-0.861856	-0.8378	-0.0542825	-0.253804	0.0189666	-0.290579	-0.777686	-0.827495	-0.599771	-1.13502	-0.875576	-0.664922	-0.721225	-0.488944	-0.63605	-0.928974	-0.77408	-0.709723	-0.83558	-0.694065	-1.06787	-0.620581
-0.909069	-0.829101	-0.448231	-0.407297	-0.199618	-0.78873	-1.04334	-0.740815	-0.831808	-0.565995	-1.04787	-1.00334	-0.83746	-0.30198	-0.552383	-0.610122	-0.62993	-0.908432	-0.844887	-0.751569	-0.591114	-0.470829	-0.71151	0.222281	-1.0466	-0.995717	-0.558602	-0.553857	-0.851943	-0.856433	-0.11951	-0.287274	-0.0357686	-0.304172	-0.801729	-0.831871	-0.626254	-1.16826	-0.881339	-0.686626	-0.733305	-0.517987	-0.662646	-0.939102	-0.822243	-0.71809	-0.855857	-0.742573	-1.09615	-0.677724
-0.9312	-0.844283	-0.478421	-0.440602	-0.212236	-0.814309	-1.03262	-0.758265	-0.844124	-0.582267	-1.07272	-1.00604	-0.860396	-0.3248	-0.580963	-0.634153	-0.653272	-0.921061	-0.861692	-0.759947	-0.658161	-0.50031	-0.738478	0.170589	-1.05127	-1.00928	-0.584969	-0.590861	-0.845547	-0.875537	-0.185284	-0.320462	-0.0920849	-0.321388	-0.825864	-0.835099	-0.651549	-1.20002	-0.888996	-0.707449	-0.74574	-0.548015	-0.689513	-0.94969	-0.871058	-0.726779	-0.876202	-0.788445	-1.12143	-0.731898
-0.951561	-0.85889	-0.506951	-0.474689	-0.227212	-0.83917	-1.02433	-0.774574	-0.858022	-0.59885	-1.0959	-1.00534	-0.881968	-0.347094	-0.609126	-0.655721	-0.678317	-0.932839	-0.878417	-0.769399	-0.723648	-0.529902	-0.767176	0.119239	-1.05575	-1.02282	-0.610774	-0.62753	-0.842249	-0.895057	-0.251566	-0.353391	-0.149378	-0.341941	-0.84988	-0.837792	-0.675159	-1.22852	-0.898033	-0.72726	-0.758056	-0.580473	-0.719006	-0.961234	-0.920205	-0.736023	-0.895806	-0.831733	-1.14387	-0.783457
-0.96935	-0.874828	-0.534885	-0.51031	-0.244789	-0.864487	-1.01904	-0.789996	-0.872833	-0.61648	-1.11832	-1.00305	-0.902167	-0.368469	-0.637006	-0.675287	-0.704738	-0.943574	-0.894965	-0.780314	-0.78603	-0.559868	-0.797862	0.0686283	-1.06014	-1.03694	-0.636425	-0.663928	-0.840926	-0.914491	-0.318215	-0.386437	-0.206418	-0.364936	-0.873492	-0.840597	-0.696896	-1.25172	-0.90763	-0.746247	-0.770509	-0.615779	-0.75257	-0.974069	-0.969271	-0.74608	-0.914313	-0.872976	-1.16331	-0.83437
-0.984182	-0.892608	-0.562877	-0.547409	-0.264727	-0.89082	-1.01596	-0.804893	-0.887423	-0.635501	-1.14075	-1.0015	-0.921576	-0.389323	-0.665442	-0.694843	-0.731831	-0.953352	-0.911277	-0.792708	-0.844204	-0.590412	-0.830481	0.0189551	-1.06461	-1.05183	-0.662629	-0.699955	-0.839246	-0.933295	-0.384387	-0.420652	-0.263659	-0.388969	-0.896837	-0.844015	-0.717105	-1.26777	-0.917068	-0.765051	-0.783701	-0.6537	-0.790637	-0.988119	-1.01779	-0.757175	-0.931945	-0.913379	-1.18	-0.886876
-0.996368	-0.911906	-0.590821	-0.585575	-0.286383	-0.91834	-1.01198	-0.819774	-0.900637	-0.655855	-1.1639	-1.00289	-0.940782	-0.41026	-0.695293	-0.716632	-0.758283	-0.962582	-0.927316	-0.80631	-0.897852	-0.621646	-0.864563	-0.0301254	-1.06903	-1.06749	-0.68949	-0.73542	-0.834594	-0.951092	-0.44895	-0.456505	-0.322618	-0.412083	-0.920082	-0.848294	-0.73694	-1.27623	-0.925744	-0.784127	-0.798159	-0.693598	-0.831756	-1.00276	-1.06546	-0.769362	-0.94926	-0.95426	-1.19397	-0.940871
-1.00727	-0.9321	-0.618323	-0.623887	-0.309144	-0.946986	-1.00418	-0.835083	-0.911882	-0.677409	-1.1875	-1.00844	-0.960421	-0.432084	-0.726879	-0.741462	-0.783042	-0.972085	-0.943087	-0.820635	-0.947881	-0.653466	-0.899135	-0.0799332	-1.07307	-1.08345	-0.71699	-0.7698	-0.826857	-0.967643	-0.511	-0.494174	-0.384668	-0.432833	-0.943406	-0.85347	-0.757988	-1.27818	-0.932986	-0.803533	-0.814074	-0.734698	-0.871377	-1.0173	-1.11162	-0.78251	-0.966868	-0.995655	-1.20437	-0.995029
-1.01856	-0.952298	-0.645017	-0.660521	-0.332653	-0.976254	-0.992143	-0.851207	-0.921005	-0.699826	-1.20941	-1.01849	-0.981032	-0.45608	-0.76013	-0.769229	-0.805867	-0.982912	-0.958651	-0.83497	-0.997062	-0.685467	-0.933338	-0.131097	-1.07644	-1.09832	-0.745044	-0.802463	-0.817541	-0.982903	-0.570503	-0.53361	-0.450517	-0.450309	-0.966973	-0.859399	-0.781146	-1.27618	-0.939018	-0.823135	-0.831081	-0.776546	-0.905525	-1.03113	-1.15547	-0.7963	-0.985021	-1.03691	-1.21192	-1.04799
-1.03071	-0.971197	-0.670723	-0.694048	-0.356205	-1.00496	-0.976996	-0.868414	-0.92823	-0.722624	-1.22811	-1.0325	-1.00253	-0.482879	-0.794707	-0.799327	-0.827075	-0.995856	-0.974211	-0.848843	-1.04612	-0.717459	-0.966717	-0.183069	-1.07901	-1.11118	-0.773474	-0.833018	-0.808585	-0.997133	-0.629114	-0.574502	-0.520241	-0.464348	-0.990735	-0.865797	-0.806794	-1.27344	-0.944726	-0.84274	-0.848328	-0.819266	-0.933071	-1.04374	-1.19655	-0.810388	-1.00324	-1.07733	-1.2175	-1.09879
-1.04357	-0.987894	-0.695514	-0.723888	-0.379675	-1.03217	-0.960538	-0.886557	-0.934169	-0.745589	-1.2428	-1.04919	-1.02375	-0.512317	-0.830111	-0.830679	-0.847269	-1.01087	-0.990357	-0.86228	-1.09473	-0.749571	-0.999044	-0.234684	-1.08094	-1.12195	-0.802203	-0.861596	-0.801553	-1.01103	-0.688865	-0.616524	-0.592824	-0.475968	-1.01428	-0.872154	-0.834833	-1.27234	-0.95109	-0.862174	-0.865373	-0.862442	-0.954848	-1.05484	-1.23501	-0.824804	-1.02085	-1.11633	-1.22219	-1.14765
-1.05684	-1.00189	-0.719789	-0.7502	-0.403318	-1.0573	-0.944426	-0.904765	-0.939805	-0.769259	-1.25328	-1.06644	-1.04363	-0.543572	-0.865747	-0.861664	-0.867053	-1.02666	-1.00754	-0.875591	-1.14254	-0.782062	-1.03028	-0.284767	-1.08288	-1.13111	-0.83157	-0.889075	-0.797353	-1.02538	-0.749588	-0.659791	-0.666695	-0.488004	-1.03724	-0.878054	-0.864504	-1.27471	-0.958661	-0.881351	-0.881954	-0.905312	-0.972949	-1.06467	-1.27208	-0.839737	-1.0376	-1.15368	-1.22717	-1.19687
-1.06988	-1.01309	-0.743899	-0.773776	-0.427418	-1.08007	-0.929815	-0.922317	-0.945713	-0.794392	-1.26005	-1.08266	-1.06153	-0.575495	-0.900984	-0.891126	-0.886861	-1.04189	-1.02605	-0.889149	-1.18863	-0.815148	-1.06072	-0.332935	-1.08524	-1.13941	-0.862146	-0.916696	-0.796167	-1.04054	-0.810007	-0.704693	-0.739772	-0.503258	-1.05932	-0.883686	-0.894143	-1.28142	-0.967364	-0.900417	-0.897873	-0.947179	-0.98974	-1.07438	-1.30971	-0.855329	-1.05346	-1.19027	-1.23253	-1.24645
-1.08128	-1.02188	-0.768222	-0.795594	-0.452275	-1.10062	-0.917535	-0.939205	-0.952237	-0.821179	-1.26404	-1.09743	-1.07709	-0.607409	-0.935341	-0.918415	-0.906874	-1.05572	-1.04594	-0.903205	-1.23065	-0.848846	-1.09128	-0.380174	-1.08831	-1.14745	-0.894094	-0.945116	-0.797743	-1.05664	-0.868883	-0.75095	-0.810133	-0.522668	-1.08026	-0.889574	-0.922276	-1.29132	-0.976989	-0.919465	-0.913384	-0.987772	-1.0077	-1.08521	-1.34805	-0.871659	-1.06854	-1.22646	-1.23576	-1.29517
-1.0901	-1.0289	-0.793124	-0.816615	-0.478123	-1.11946	-0.90804	-0.95578	-0.959597	-0.849424	-1.2666	-1.11108	-1.09038	-0.639699	-0.968485	-0.943282	-0.927044	-1.06755	-1.0669	-0.917804	-1.26749	-0.882849	-1.12264	-0.427674	-1.09226	-1.15543	-0.927265	-0.974684	-0.801225	-1.07364	-0.92537	-0.797804	-0.877618	-0.545879	-1.10002	-0.896227	-0.948055	-1.29995	-0.987038	-0.938575	-0.929593	-1.02759	-1.02972	-1.09755	-1.3864	-0.888748	-1.08317	-1.26235	-1.23481	-1.34185
-1.09651	-1.03484	-0.818561	-0.838077	-0.504261	-1.13768	-0.90122	-0.972441	-0.96784	-0.878711	-1.26984	-1.12422	-1.10192	-0.672592	-1.00029	-0.96589	-0.947175	-1.07719	-1.08812	-0.932697	-1.29877	-0.916673	-1.1547	-0.475969	-1.09685	-1.16363	-0.961339	-1.00555	-0.805396	-1.09122	-0.979367	-0.844424	-0.945559	-0.571716	-1.11876	-0.903884	-0.971101	-1.30337	-0.996725	-0.957844	-0.947356	-1.06704	-1.0567	-1.11127	-1.42402	-0.906219	-1.09803	-1.2981	-1.22989	-1.38542
-1.10141	-1.04044	-0.843738	-0.860503	-0.530408	-1.15662	-0.896439	-0.989482	-0.976754	-0.908569	-1.27484	-1.13762	-1.11293	-0.706178	-1.03103	-0.986797	-0.967052	-1.08516	-1.10891	-0.947477	-1.32479	-0.950054	-1.18688	-0.525327	-1.10119	-1.17209	-0.995929	-1.03731	-0.809612	-1.10868	-1.03212	-0.890367	-1.01763	-0.598619	-1.13712	-0.912277	-0.991548	-1.30048	-1.00533	-0.977235	-0.966979	-1.10541	-1.08785	-1.12597	-1.46017	-0.923814	-1.11409	-1.33346	-1.22252	-1.42455
-1.10595	-1.04595	-0.868058	-0.883902	-0.556518	-1.17662	-0.892928	-1.00699	-0.985685	-0.938705	-1.28191	-1.15236	-1.12507	-0.740551	-1.06161	-1.0068	-0.986573	-1.09318	-1.12866	-0.961626	-1.34669	-0.982854	-1.21861	-0.575889	-1.10446	-1.18062	-1.03072	-1.06852	-0.814394	-1.12562	-1.08374	-0.936069	-1.09465	-0.62437	-1.15601	-0.920694	-1.01014	-1.29213	-1.01272	-0.996517	-0.988407	-1.14161	-1.12142	-1.14104	-1.49431	-0.941323	-1.13177	-1.36752	-1.21456	-1.45872
-1.1108	-1.05138	-0.891306	-0.908037	-0.582537	-1.19738	-0.889903	-1.02478	-0.994151	-0.968888	-1.29096	-1.16901	-1.13902	-0.775716	-1.09276	-1.02604	-1.00595	-1.10321	-1.14688	-0.974712	-1.3655	-1.01501	-1.24953	-0.627295	-1.1062	-1.18901	-1.06544	-1.09813	-0.819979	-1.14192	-1.13388	-0.981968	-1.17583	-0.646305	-1.17566	-0.928819	-1.02859	-1.28039	-1.0198	-1.0156	-1.01132	-1.1748	-1.15546	-1.15563	-1.52761	-0.958536	-1.15112	-1.40015	-1.20723	-1.48719
-1.11567	-1.05671	-0.913478	-0.932308	-0.608719	-1.21844	-0.886553	-1.04272	-1.00248	-0.998319	-1.30109	-1.18669	-1.15483	-0.811592	-1.1245	-1.04451	-1.02594	-1.11593	-1.16331	-0.986752	-1.38155	-1.04669	-1.28006	-0.678362	-1.10623	-1.19708	-1.09951	-1.12587	-0.826963	-1.1576	-1.18234	-1.02746	-1.25961	-0.663799	-1.19594	-0.936529	-1.04872	-1.26761	-1.02777	-1.03429	-1.03527	-1.20493	-1.18783	-1.16913	-1.56	-0.975536	-1.17191	-1.43067	-1.2003	-1.50956
-1.12015	-1.06172	-0.934719	-0.955373	-0.635985	-1.23918	-0.883108	-1.06067	-1.01141	-1.02595	-1.31	-1.20361	-1.17214	-0.848204	-1.15648	-1.06233	-1.04697	-1.13115	-1.17824	-0.998495	-1.39625	-1.07872	-1.31143	-0.728124	-1.10461	-1.20474	-1.13225	-1.15198	-0.836183	-1.1728	-1.22874	-1.0715	-1.34417	-0.677782	-1.21658	-0.943779	-1.07082	-1.25613	-1.0372	-1.05237	-1.05993	-1.23337	-1.21675	-1.18118	-1.59074	-0.992947	-1.19361	-1.45817	-1.19337	-1.52635
-1.12405	-1.06579	-0.955285	-0.97639	-0.664952	-1.25877	-0.880408	-1.07848	-1.02162	-1.05102	-1.31625	-1.21805	-1.19019	-0.88543	-1.18827	-1.07961	-1.06921	-1.14816	-1.19286	-1.0107	-1.41032	-1.11216	-1.34372	-0.776114	-1.10177	-1.21245	-1.16317	-1.17697	-0.84816	-1.18767	-1.27221	-1.11323	-1.42887	-0.689917	-1.23719	-0.950813	-1.09426	-1.24874	-1.04827	-1.06966	-1.0853	-1.26255	-1.24196	-1.19172	-1.61929	-1.01116	-1.21545	-1.4822	-1.18697	-1.53838
-1.12727	-1.06898	-0.975535	-0.995727	-0.696026	-1.27712	-0.879269	-1.09622	-1.03338	-1.07356	-1.31964	-1.22942	-1.20751	-0.922489	-1.21957	-1.09651	-1.09263	-1.16595	-1.20862	-1.02382	-1.42411	-1.14704	-1.37632	-0.822194	-1.09848	-1.22053	-1.19233	-1.20137	-0.862836	-1.20239	-1.31275	-1.15246	-1.51564	-0.701945	-1.25733	-0.958356	-1.11807	-1.24659	-1.06086	-1.08618	-1.11104	-1.29282	-1.26448	-1.20096	-1.64518	-1.03034	-1.23689	-1.50288	-1.18198	-1.54641
-1.12985	-1.07182	-0.99588	-1.0145	-0.729391	-1.29428	-0.880128	-1.11452	-1.04618	-1.09481	-1.32073	-1.23923	-1.22316	-0.958256	-1.25044	-1.11316	-1.11688	-1.18304	-1.22565	-1.03817	-1.43794	-1.18269	-1.40861	-0.866503	-1.09551	-1.22922	-1.22086	-1.22559	-0.879441	-1.21702	-1.34984	-1.19039	-1.60196	-0.715374	-1.27717	-0.966886	-1.14131	-1.24925	-1.07443	-1.10211	-1.13654	-1.32343	-1.28595	-1.20928	-1.66784	-1.05048	-1.25752	-1.5213	-1.17913	-1.55235
-1.13196	-1.07511	-1.0165	-1.03396	-0.764922	-1.31044	-0.883043	-1.13446	-1.05917	-1.11599	-1.32052	-1.24945	-1.23673	-0.991801	-1.28162	-1.13016	-1.14104	-1.19824	-1.24339	-1.05385	-1.4514	-1.21837	-1.43997	-0.909455	-1.09327	-1.23867	-1.25019	-1.2499	-0.8965	-1.23143	-1.38294	-1.22904	-1.68296	-0.730956	-1.29654	-0.976846	-1.16314	-1.25521	-1.08787	-1.11765	-1.16123	-1.35357	-1.30777	-1.21726	-1.68764	-1.07147	-1.27702	-1.53966	-1.17858	-1.55732
-1.13409	-1.07956	-1.03743	-1.05473	-0.802238	-1.32596	-0.887584	-1.15611	-1.07194	-1.13739	-1.31984	-1.26092	-1.24825	-1.02304	-1.31322	-1.14827	-1.16427	-1.21098	-1.2611	-1.07059	-1.46253	-1.25348	-1.46992	-0.951795	-1.09197	-1.24869	-1.28029	-1.27436	-0.912816	-1.2454	-1.41213	-1.2684	-1.75467	-0.749044	-1.31506	-0.98859	-1.18346	-1.26248	-1.1002	-1.13295	-1.18491	-1.38226	-1.33113	-1.22541	-1.7041	-1.0931	-1.29524	-1.55843	-1.18009	-1.56203
-1.13732	-1.08526	-1.05866	-1.07646	-0.841112	-1.34103	-0.892826	-1.17892	-1.08423	-1.15891	-1.31915	-1.27394	-1.2581	-1.05344	-1.34497	-1.16824	-1.18594	-1.22118	-1.27811	-1.08753	-1.47061	-1.28813	-1.49851	-0.994283	-1.09165	-1.25856	-1.31037	-1.29897	-0.927322	-1.25878	-1.4378	-1.30739	-1.81578	-0.769502	-1.33248	-1.00219	-1.20233	-1.2687	-1.11064	-1.14814	-1.20812	-1.40819	-1.35766	-1.23378	-1.71651	-1.11537	-1.31239	-1.57714	-1.18404	-1.56722
-1.14238	-1.09111	-1.08007	-1.09892	-0.881708	-1.3555	-0.89744	-1.20216	-1.09586	-1.18038	-1.31884	-1.28859	-1.26686	-1.08497	-1.37655	-1.19058	-1.20558	-1.22924	-1.29413	-1.10394	-1.47639	-1.32335	-1.52518	-1.03714	-1.09201	-1.26757	-1.33962	-1.32365	-0.939273	-1.27158	-1.46058	-1.34497	-1.86888	-0.791732	-1.34871	-1.01738	-1.22005	-1.27154	-1.11862	-1.16336	-1.23128	-1.4312	-1.38657	-1.24213	-1.72479	-1.13859	-1.32932	-1.59528	-1.19074	-1.57251
-1.14964	-1.09597	-1.10157	-1.12156	-0.923357	-1.36959	-0.900188	-1.22518	-1.10708	-1.20145	-1.31869	-1.30423	-1.27534	-1.11795	-1.4076	-1.21501	-1.22304	-1.23588	-1.30994	-1.11945	-1.48143	-1.35884	-1.54912	-1.08034	-1.09223	-1.27522	-1.36745	-1.34834	-0.949088	-1.28417	-1.48276	-1.3803	-1.91812	-0.815068	-1.36381	-1.03353	-1.23714	-1.27027	-1.12402	-1.17866	-1.25398	-1.45114	-1.41536	-1.2502	-1.72916	-1.16246	-1.34705	-1.61205	-1.20004	-1.5753
-1.15908	-1.09935	-1.12371	-1.1435	-0.96482	-1.3829	-0.90089	-1.24777	-1.11903	-1.22141	-1.31807	-1.31886	-1.28454	-1.15177	-1.43782	-1.24018	-1.2387	-1.24215	-1.32535	-1.13391	-1.48738	-1.39358	-1.56995	-1.12374	-1.09174	-1.28119	-1.39369	-1.37331	-0.959244	-1.29743	-1.50514	-1.41284	-1.96338	-0.838999	-1.37818	-1.04989	-1.25387	-1.26552	-1.12733	-1.19391	-1.27545	-1.46808	-1.44147	-1.25774	-1.73014	-1.18634	-1.36535	-1.62612	-1.2114	-1.57479
-1.17013	-1.10112	-1.14645	-1.16399	-1.00488	-1.39471	-0.901099	-1.27014	-1.13283	-1.24019	-1.3164	-1.33073	-1.29438	-1.18567	-1.46756	-1.26491	-1.25368	-1.24896	-1.33969	-1.14734	-1.49487	-1.42662	-1.58776	-1.16713	-1.09059	-1.28541	-1.4193	-1.39976	-0.971999	-1.31156	-1.52764	-1.4432	-2.00291	-0.863239	-1.39163	-1.06609	-1.26997	-1.25875	-1.1299	-1.20938	-1.2951	-1.48247	-1.46352	-1.26468	-1.72996	-1.20956	-1.38333	-1.63767	-1.22417	-1.57167
-1.18138	-1.10139	-1.16928	-1.1829	-1.04312	-1.40454	-0.902054	-1.29174	-1.14877	-1.25789	-1.31341	-1.339	-1.30406	-1.21881	-1.49622	-1.28855	-1.26903	-1.25639	-1.35245	-1.16002	-1.50288	-1.45738	-1.60344	-1.2107	-1.08919	-1.28823	-1.44426	-1.42785	-0.98807	-1.32634	-1.55008	-1.47138	-2.03546	-0.88835	-1.40376	-1.08194	-1.28522	-1.25156	-1.1331	-1.22508	-1.3128	-1.49465	-1.482	-1.27147	-1.72937	-1.2318	-1.40013	-1.64661	-1.23778	-1.56742
-1.19135	-1.10066	-1.1917	-1.20136	-1.08068	-1.4123	-0.904433	-1.3117	-1.16657	-1.2748	-1.30943	-1.34358	-1.3128	-1.25027	-1.5228	-1.31072	-1.28514	-1.26399	-1.36331	-1.17263	-1.51102	-1.48592	-1.61873	-1.25619	-1.08799	-1.29056	-1.46814	-1.45702	-1.00726	-1.34145	-1.57162	-1.49718	-2.06009	-0.915324	-1.41435	-1.09731	-1.29914	-1.24604	-1.1374	-1.24083	-1.32945	-1.50439	-1.49807	-1.27836	-1.72833	-1.25345	-1.41525	-1.65279	-1.25121	-1.56366
-1.19923	-1.09998	-1.21333	-1.22127	-1.11897	-1.41858	-0.908706	-1.32938	-1.18567	-1.29131	-1.30558	-1.3449	-1.32005	-1.27985	-1.5466	-1.33121	-1.30203	-1.27126	-1.37207	-1.18573	-1.51857	-1.51288	-1.63384	-1.30338	-1.08729	-1.29342	-1.49061	-1.48654	-1.02886	-1.35646	-1.59002	-1.52072	-2.07544	-0.944929	-1.42335	-1.11241	-1.31113	-1.24482	-1.14281	-1.25647	-1.34675	-1.51203	-1.51287	-1.28547	-1.7268	-1.27512	-1.42898	-1.65648	-1.26338	-1.56092
-1.20468	-1.10033	-1.23401	-1.24316	-1.15741	-1.42491	-0.915017	-1.34467	-1.20546	-1.30755	-1.30263	-1.34388	-1.32574	-1.30711	-1.56747	-1.35037	-1.31958	-1.27775	-1.37903	-1.19938	-1.52451	-1.53779	-1.6482	-1.35082	-1.087	-1.29722	-1.51134	-1.51569	-1.05175	-1.37093	-1.60433	-1.54199	-2.08269	-0.977299	-1.43099	-1.12818	-1.32087	-1.24758	-1.1491	-1.27181	-1.36485	-1.51745	-1.52784	-1.29288	-1.72405	-1.29648	-1.4425	-1.65782	-1.27331	-1.55749
-1.20778	-1.10227	-1.25396	-1.26677	-1.19445	-1.43176	-0.922943	-1.35821	-1.22582	-1.32312	-1.30108	-1.34173	-1.33063	-1.33166	-1.58629	-1.36954	-1.33742	-1.28329	-1.38381	-1.21337	-1.52813	-1.5598	-1.66132	-1.39705	-1.08673	-1.30204	-1.52988	-1.54405	-1.07448	-1.385	-1.61444	-1.56052	-2.08224	-1.01212	-1.43815	-1.1455	-1.32852	-1.25189	-1.15571	-1.28687	-1.38305	-1.52043	-1.54438	-1.30044	-1.71779	-1.31678	-1.45597	-1.65638	-1.28037	-1.5516
-1.20924	-1.10602	-1.27285	-1.29152	-1.2287	-1.43902	-0.93112	-1.37088	-1.24748	-1.33788	-1.30123	-1.33941	-1.33513	-1.35353	-1.60499	-1.39009	-1.35494	-1.28854	-1.38586	-1.22741	-1.52941	-1.57849	-1.67261	-1.44101	-1.08628	-1.3078	-1.5465	-1.57188	-1.09588	-1.39826	-1.62092	-1.57675	-2.07486	-1.04905	-1.44509	-1.16412	-1.33496	-1.25488	-1.16157	-1.30224	-1.4006	-1.52111	-1.56256	-1.30759	-1.707	-1.33539	-1.46904	-1.65247	-1.28493	-1.54285
-1.2107	-1.11151	-1.29017	-1.31649	-1.25962	-1.44648	-0.937911	-1.38264	-1.26981	-1.35168	-1.30265	-1.33764	-1.33959	-1.373	-1.62363	-1.41191	-1.37239	-1.29395	-1.385	-1.24127	-1.52943	-1.59384	-1.68124	-1.48274	-1.08558	-1.31408	-1.56077	-1.5984	-1.11533	-1.41009	-1.62493	-1.59046	-2.0626	-1.08653	-1.45172	-1.18319	-1.34193	-1.25461	-1.16613	-1.31773	-1.41681	-1.5197	-1.58036	-1.31411	-1.69182	-1.35209	-1.48138	-1.64601	-1.28937	-1.53164
-1.2138	-1.11828	-1.30559	-1.34049	-1.28813	-1.45358	-0.942768	-1.39308	-1.29138	-1.36443	-1.30373	-1.33707	-1.34431	-1.39081	-1.64135	-1.43413	-1.38981	-1.29989	-1.38133	-1.25504	-1.53009	-1.60645	-1.68792	-1.52372	-1.08456	-1.32016	-1.57208	-1.62236	-1.1327	-1.42009	-1.62729	-1.60126	-2.04625	-1.12216	-1.45802	-1.20175	-1.35017	-1.25056	-1.16944	-1.33274	-1.43093	-1.51629	-1.59633	-1.31959	-1.67317	-1.36755	-1.49256	-1.63692	-1.29631	-1.51876
-1.21889	-1.12548	-1.31911	-1.3629	-1.31629	-1.45911	-0.94582	-1.40198	-1.3109	-1.3761	-1.30288	-1.33811	-1.34913	-1.40867	-1.65738	-1.45581	-1.40705	-1.30664	-1.37506	-1.26952	-1.53229	-1.61831	-1.69285	-1.5631	-1.08336	-1.32604	-1.58023	-1.64288	-1.14819	-1.42818	-1.62805	-1.6092	-2.02278	-1.15384	-1.46373	-1.21927	-1.35986	-1.24273	-1.17189	-1.34672	-1.44309	-1.51272	-1.60914	-1.32353	-1.65252	-1.38328	-1.50195	-1.6255	-1.30584	-1.50517
-1.22554	-1.13263	-1.33114	-1.38275	-1.34409	-1.46274	-0.947531	-1.40917	-1.32778	-1.38683	-1.29925	-1.34051	-1.35299	-1.42655	-1.67104	-1.47631	-1.424	-1.31401	-1.36697	-1.28468	-1.5363	-1.62976	-1.69606	-1.59898	-1.08261	-1.33159	-1.58537	-1.65983	-1.16238	-1.43495	-1.62811	-1.61444	-1.99169	-1.18125	-1.46827	-1.23635	-1.37092	-1.23171	-1.17409	-1.35932	-1.45311	-1.50986	-1.61754	-1.32565	-1.63077	-1.39918	-1.50963	-1.61196	-1.31663	-1.49229
-1.233	-1.1395	-1.34268	-1.39907	-1.37053	-1.46398	-0.948668	-1.41454	-1.34279	-1.39701	-1.29254	-1.34347	-1.35509	-1.44351	-1.68179	-1.49612	-1.44049	-1.32099	-1.35768	-1.29995	-1.54198	-1.64025	-1.6978	-1.62988	-1.08308	-1.3366	-1.58802	-1.67449	-1.17662	-1.44155	-1.62764	-1.61703	-1.95536	-1.20755	-1.47203	-1.25436	-1.38266	-1.21895	-1.17639	-1.37072	-1.46082	-1.50789	-1.62105	-1.32607	-1.60745	-1.41427	-1.51505	-1.5961	-1.32714	-1.48252
-1.24048	-1.14597	-1.35379	-1.41144	-1.39482	-1.46244	-0.950474	-1.41888	-1.35721	-1.40782	-1.28296	-1.34758	-1.35483	-1.45873	-1.69071	-1.51734	-1.45633	-1.32694	-1.34787	-1.31479	-1.54853	-1.64937	-1.69796	-1.65522	-1.08503	-1.34095	-1.59017	-1.68924	-1.19232	-1.44784	-1.62637	-1.61861	-1.91767	-1.23692	-1.4749	-1.27314	-1.39346	-1.20623	-1.17878	-1.38178	-1.46634	-1.50679	-1.62028	-1.32554	-1.58273	-1.42774	-1.51752	-1.57906	-1.33612	-1.47681
-1.24719	-1.15198	-1.36412	-1.42028	-1.41626	-1.45815	-0.953924	-1.42253	-1.37052	-1.41939	-1.27129	-1.35292	-1.35189	-1.4715	-1.69773	-1.53982	-1.47184	-1.33114	-1.33833	-1.32874	-1.55447	-1.65642	-1.6957	-1.67579	-1.08836	-1.34457	-1.59231	-1.70393	-1.20903	-1.45308	-1.62411	-1.61998	-1.88238	-1.26968	-1.47647	-1.29169	-1.40254	-1.1943	-1.18133	-1.39222	-1.46983	-1.50581	-1.61767	-1.32535	-1.5568	-1.43898	-1.51682	-1.56164	-1.3431	-1.47497
-1.2531	-1.15765	-1.37341	-1.427	-1.43418	-1.45142	-0.959427	-1.42562	-1.38141	-1.43124	-1.25922	-1.35902	-1.34636	-1.4812	-1.7023	-1.56215	-1.48643	-1.33287	-1.32909	-1.34169	-1.55923	-1.66008	-1.69116	-1.69387	-1.09274	-1.34764	-1.5941	-1.71719	-1.22533	-1.45664	-1.62052	-1.62138	-1.85022	-1.30408	-1.47654	-1.30905	-1.40931	-1.18197	-1.18371	-1.40122	-1.47127	-1.50272	-1.6172	-1.32568	-1.52984	-1.44772	-1.51309	-1.54444	-1.34902	-1.47619
-1.25821	-1.16329	-1.38139	-1.43344	-1.44926	-1.44268	-0.966955	-1.42837	-1.38884	-1.44285	-1.24862	-1.36536	-1.33874	-1.4885	-1.70419	-1.58288	-1.49912	-1.33177	-1.31876	-1.35412	-1.56152	-1.66041	-1.68395	-1.70934	-1.09774	-1.35065	-1.59519	-1.72782	-1.23979	-1.45813	-1.61488	-1.62296	-1.8162	-1.338	-1.47496	-1.32454	-1.41334	-1.16821	-1.18539	-1.40816	-1.4713	-1.49587	-1.62024	-1.32609	-1.50218	-1.45478	-1.50694	-1.52798	-1.35382	-1.47913
-1.26255	-1.16888	-1.38776	-1.44005	-1.46148	-1.43271	-0.97613	-1.43057	-1.39245	-1.45372	-1.24016	-1.37135	-1.32996	-1.49385	-1.70314	-1.6009	-1.50917	-1.32815	-1.30676	-1.36555	-1.55982	-1.65755	-1.67356	-1.72112	-1.10294	-1.35315	-1.59484	-1.73496	-1.2517	-1.45757	-1.60783	-1.62417	-1.77607	-1.36955	-1.47161	-1.33803	-1.41461	-1.15211	-1.18591	-1.41278	-1.46985	-1.48467	-1.62654	-1.32612	-1.47389	-1.46021	-1.50004	-1.51197	-1.35698	-1.48201
-1.26634	-1.17413	-1.3933	-1.44659	-1.47068	-1.42186	-0.986371	-1.43121	-1.39281	-1.46366	-1.23369	-1.37665	-1.32144	-1.49772	-1.69846	-1.6156	-1.51645	-1.32336	-1.29342	-1.37512	-1.55337	-1.65185	-1.65998	-1.72865	-1.10817	-1.35425	-1.59145	-1.73825	-1.26161	-1.45619	-1.60008	-1.62308	-1.72946	-1.39731	-1.46707	-1.35003	-1.41354	-1.13279	-1.18517	-1.41543	-1.46658	-1.4693	-1.63517	-1.32526	-1.44447	-1.46377	-1.49289	-1.4944	-1.35822	-1.48402
-1.26966	-1.17864	-1.39817	-1.4528	-1.4771	-1.41033	-0.997397	-1.43001	-1.39157	-1.4738	-1.22874	-1.38147	-1.31392	-1.50071	-1.69061	-1.62721	-1.52208	-1.31943	-1.27953	-1.3822	-1.54249	-1.64403	-1.6434	-1.7315	-1.11297	-1.35322	-1.58462	-1.73935	-1.27146	-1.45414	-1.59241	-1.61884	-1.67829	-1.42121	-1.46125	-1.36002	-1.41108	-1.10988	-1.18391	-1.4174	-1.46144	-1.45067	-1.64428	-1.32302	-1.41456	-1.46544	-1.48536	-1.47388	-1.35721	-1.48426
-1.27244	-1.18207	-1.40219	-1.45806	-1.48077	-1.39838	-1.00996	-1.42687	-1.38896	-1.48377	-1.22444	-1.3848	-1.30776	-1.50288	-1.67956	-1.63498	-1.52839	-1.31676	-1.26593	-1.38662	-1.52897	-1.63444	-1.62423	-1.729	-1.11679	-1.34986	-1.57428	-1.73845	-1.28176	-1.451	-1.58549	-1.61104	-1.62552	-1.44035	-1.45381	-1.36716	-1.40862	-1.08379	-1.18369	-1.41874	-1.4544	-1.42984	-1.65083	-1.31996	-1.38505	-1.46505	-1.47735	-1.45024	-1.3532	-1.48183
-1.2747	-1.18447	-1.40527	-1.4613	-1.48075	-1.38588	-1.02368	-1.42185	-1.38459	-1.49235	-1.21943	-1.38503	-1.30304	-1.50337	-1.66528	-1.63797	-1.53548	-1.31481	-1.25293	-1.38893	-1.51553	-1.6224	-1.60448	-1.72287	-1.11919	-1.34497	-1.56075	-1.73514	-1.2923	-1.44649	-1.57922	-1.59969	-1.57354	-1.45382	-1.44459	-1.37102	-1.40615	-1.05567	-1.18476	-1.41883	-1.44535	-1.40784	-1.65342	-1.31601	-1.35677	-1.462	-1.4683	-1.42407	-1.34562	-1.47627
-1.27582	-1.18664	-1.40712	-1.46285	-1.47709	-1.37207	-1.03745	-1.41525	-1.37836	-1.4985	-1.21322	-1.38093	-1.29922	-1.50242	-1.64817	-1.63594	-1.54227	-1.31293	-1.23984	-1.39048	-1.5029	-1.60832	-1.58482	-1.71377	-1.12016	-1.34035	-1.5448	-1.72927	-1.30274	-1.44021	-1.57241	-1.58539	-1.52362	-1.46155	-1.43354	-1.37158	-1.403	-1.02703	-1.18662	-1.41726	-1.43561	-1.3862	-1.65076	-1.31079	-1.33033	-1.45655	-1.45671	-1.39637	-1.33383	-1.46782
-1.27495	-1.18988	-1.4069	-1.46294	-1.46998	-1.35716	-1.05016	-1.40732	-1.36991	-1.50163	-1.20572	-1.37236	-1.29478	-1.49946	-1.62845	-1.62917	-1.54767	-1.31031	-1.22619	-1.3913	-1.49072	-1.59218	-1.56513	-1.70196	-1.12054	-1.33615	-1.52698	-1.72044	-1.31236	-1.43132	-1.56485	-1.56882	-1.47848	-1.46404	-1.42069	-1.36941	-1.39855	-0.999792	-1.18863	-1.41361	-1.42572	-1.36558	-1.64194	-1.30409	-1.30547	-1.44854	-1.44215	-1.36796	-1.3175	-1.45804
-1.27151	-1.19443	-1.40439	-1.46182	-1.45999	-1.34149	-1.06124	-1.3982	-1.35816	-1.50184	-1.19707	-1.3609	-1.28892	-1.49351	-1.60566	-1.61866	-1.55075	-1.30605	-1.2119	-1.39084	-1.47834	-1.57382	-1.54523	-1.68805	-1.12137	-1.33166	-1.50711	-1.70732	-1.31973	-1.41982	-1.55555	-1.55058	-1.43978	-1.4621	-1.40713	-1.36609	-1.39231	-0.976021	-1.19007	-1.40726	-1.41572	-1.34607	-1.6271	-1.29571	-1.28053	-1.43777	-1.42463	-1.33912	-1.29701	-1.44858
-1.26553	-1.19998	-1.39938	-1.45993	-1.44806	-1.32548	-1.07119	-1.38882	-1.34336	-1.50018	-1.18762	-1.34907	-1.28144	-1.48408	-1.58074	-1.60713	-1.55082	-1.30066	-1.19703	-1.38873	-1.46465	-1.55341	-1.52439	-1.67173	-1.12243	-1.32618	-1.48585	-1.68994	-1.32408	-1.40555	-1.5431	-1.53234	-1.40766	-1.45748	-1.39302	-1.36193	-1.38413	-0.957169	-1.19021	-1.39872	-1.40564	-1.32755	-1.60721	-1.28542	-1.25399	-1.42444	-1.40453	-1.31023	-1.27307	-1.43879
-1.25809	-1.20603	-1.39185	-1.45729	-1.43471	-1.3096	-1.08113	-1.37927	-1.32588	-1.49637	-1.17764	-1.33708	-1.27246	-1.47118	-1.55429	-1.595	-1.54882	-1.29397	-1.18173	-1.38461	-1.4476	-1.53103	-1.5007	-1.65035	-1.12287	-1.31901	-1.46336	-1.66796	-1.32432	-1.38839	-1.52665	-1.51451	-1.3809	-1.4505	-1.37798	-1.35661	-1.37537	-0.942816	-1.18908	-1.38807	-1.39499	-1.30935	-1.58436	-1.27366	-1.225	-1.4088	-1.38266	-1.28165	-1.24665	-1.42692
-1.2512	-1.212	-1.38213	-1.45316	-1.41945	-1.29385	-1.09008	-1.36913	-1.30625	-1.48957	-1.16741	-1.32411	-1.26236	-1.45523	-1.52675	-1.58155	-1.54451	-1.2855	-1.16619	-1.37809	-1.42608	-1.50637	-1.47331	-1.62256	-1.12191	-1.30938	-1.43958	-1.64115	-1.3195	-1.36866	-1.50625	-1.49674	-1.35741	-1.44094	-1.3618	-1.34998	-1.36642	-0.929488	-1.18607	-1.37534	-1.3824	-1.28993	-1.56168	-1.26013	-1.19316	-1.39087	-1.35954	-1.25364	-1.21986	-1.41148
-1.24551	-1.21736	-1.3706	-1.44759	-1.40327	-1.27742	-1.09604	-1.35808	-1.28531	-1.47939	-1.15738	-1.30944	-1.25157	-1.43784	-1.4987	-1.56623	-1.53719	-1.27499	-1.15094	-1.37022	-1.39969	-1.48063	-1.44206	-1.58859	-1.11914	-1.29763	-1.4146	-1.61001	-1.30946	-1.34667	-1.48336	-1.47859	-1.33452	-1.42893	-1.34413	-1.34161	-1.35709	-0.913729	-1.18043	-1.36082	-1.36733	-1.26869	-1.53937	-1.24431	-1.15858	-1.37207	-1.33506	-1.22639	-1.194	-1.39188
-1.24088	-1.2224	-1.35754	-1.44014	-1.38678	-1.26012	-1.09742	-1.34577	-1.26322	-1.46566	-1.14683	-1.29231	-1.2405	-1.42005	-1.47002	-1.54817	-1.52658	-1.26228	-1.13706	-1.36115	-1.3689	-1.45455	-1.40729	-1.54983	-1.11479	-1.28355	-1.38829	-1.57506	-1.29484	-1.32244	-1.46067	-1.45932	-1.31017	-1.41417	-1.32427	-1.33033	-1.34723	-0.894603	-1.17176	-1.34456	-1.34933	-1.24601	-1.51601	-1.22601	-1.12196	-1.35298	-1.31006	-1.19973	-1.16982	-1.36902
-1.23698	-1.22668	-1.34421	-1.43015	-1.37025	-1.24169	-1.09377	-1.33199	-1.23861	-1.44845	-1.13444	-1.27175	-1.22981	-1.40263	-1.43919	-1.52551	-1.51249	-1.24714	-1.12459	-1.35058	-1.33501	-1.42853	-1.36994	-1.50837	-1.11012	-1.26679	-1.35993	-1.53632	-1.27725	-1.297	-1.43893	-1.43765	-1.28282	-1.39539	-1.30258	-1.31635	-1.33635	-0.872529	-1.16015	-1.32588	-1.32821	-1.22285	-1.4902	-1.20524	-1.08495	-1.33366	-1.28461	-1.17319	-1.14779	-1.34577
-1.23299	-1.22941	-1.33098	-1.41728	-1.35396	-1.22181	-1.08634	-1.31791	-1.21067	-1.42918	-1.11917	-1.24882	-1.21924	-1.3861	-1.40594	-1.49837	-1.49454	-1.22986	-1.11284	-1.3384	-1.29913	-1.40287	-1.33074	-1.46551	-1.10522	-1.24739	-1.33003	-1.49565	-1.25965	-1.27077	-1.41777	-1.41347	-1.25146	-1.37355	-1.27912	-1.29995	-1.32313	-0.84852	-1.1463	-1.30496	-1.30425	-1.20023	-1.4607	-1.18228	-1.04952	-1.31414	-1.25836	-1.14713	-1.12719	-1.32298
-1.22734	-1.23001	-1.31764	-1.40162	-1.33759	-1.20035	-1.07739	-1.30358	-1.17957	-1.40816	-1.10079	-1.22373	-1.20806	-1.37005	-1.37049	-1.46738	-1.47345	-1.21004	-1.10105	-1.32431	-1.26169	-1.3772	-1.28978	-1.42059	-1.09967	-1.2254	-1.29929	-1.45405	-1.24305	-1.24385	-1.39662	-1.38696	-1.21608	-1.34977	-1.25392	-1.28157	-1.30692	-0.824073	-1.13146	-1.2819	-1.27794	-1.17858	-1.42617	-1.15849	-1.01637	-1.29394	-1.23102	-1.12186	-1.10511	-1.30049
-1.21937	-1.22829	-1.30403	-1.38393	-1.31973	-1.17737	-1.06733	-1.28841	-1.14617	-1.38525	-1.0805	-1.19639	-1.19558	-1.35257	-1.33335	-1.43362	-1.44913	-1.18715	-1.0886	-1.3073	-1.22424	-1.34988	-1.24783	-1.37409	-1.09308	-1.20056	-1.26854	-1.41201	-1.22734	-1.21639	-1.3744	-1.35856	-1.17757	-1.32525	-1.22722	-1.2619	-1.28717	-0.801494	-1.11574	-1.25688	-1.24989	-1.15741	-1.38752	-1.1343	-0.985317	-1.2715	-1.20222	-1.09753	-1.07951	-1.27799
-1.20856	-1.22485	-1.28967	-1.36639	-1.30015	-1.15331	-1.05587	-1.2719	-1.11167	-1.36056	-1.06074	-1.16699	-1.18147	-1.33297	-1.29527	-1.39851	-1.42131	-1.16108	-1.0755	-1.2873	-1.18739	-1.32018	-1.20525	-1.32695	-1.08499	-1.17322	-1.23854	-1.36999	-1.21214	-1.18811	-1.34912	-1.32904	-1.13784	-1.30128	-1.19903	-1.24114	-1.26356	-0.782628	-1.0988	-1.23035	-1.22165	-1.13646	-1.34578	-1.10966	-0.955797	-1.24626	-1.17128	-1.07412	-1.05033	-1.25447
-1.19457	-1.22095	-1.27369	-1.34933	-1.27891	-1.12924	-1.04292	-1.25354	-1.07681	-1.33386	-1.04224	-1.13528	-1.16628	-1.31051	-1.25653	-1.36247	-1.39018	-1.13202	-1.06256	-1.26424	-1.15097	-1.28764	-1.16215	-1.28021	-1.07475	-1.14352	-1.20925	-1.32747	-1.1963	-1.15784	-1.3199	-1.29877	-1.09831	-1.27782	-1.16877	-1.21852	-1.23634	-0.768062	-1.08044	-1.20251	-1.19366	-1.11488	-1.30224	-1.08454	-0.926833	-1.2181	-1.13844	-1.05134	-1.01869	-1.22719
-1.17754	-1.21624	-1.2565	-1.33211	-1.25623	-1.10523	-1.02795	-1.23264	-1.04146	-1.3039	-1.02479	-1.09929	-1.15182	-1.28461	-1.2164	-1.32386	-1.35592	-1.10043	-1.04943	-1.2382	-1.1146	-1.25201	-1.11864	-1.23485	-1.06247	-1.11173	-1.17932	-1.28176	-1.17704	-1.12546	-1.28616	-1.26746	-1.05946	-1.25221	-1.13645	-1.19422	-1.20608	-0.757369	-1.0604	-1.17305	-1.16569	-1.0914	-1.25846	-1.05851	-0.896791	-1.18729	-1.10419	-1.02849	-0.986066	-1.19414
-1.15794	-1.20965	-1.2382	-1.31412	-1.2325	-1.08087	-1.00931	-1.20931	-1.00634	-1.27093	-1.00792	-1.05736	-1.13831	-1.25531	-1.1747	-1.28186	-1.3182	-1.068	-1.03515	-1.2097	-1.07742	-1.21355	-1.07451	-1.19085	-1.04776	-1.0784	-1.14808	-1.23128	-1.15285	-1.09122	-1.24784	-1.23578	-1.02115	-1.22266	-1.10211	-1.16808	-1.17361	-0.749438	-1.03803	-1.14275	-1.13743	-1.06512	-1.21462	-1.0302	-0.864376	-1.15455	-1.06926	-1.00487	-0.953561	-1.15455
-1.13662	-1.20035	-1.21871	-1.29452	-1.2079	-1.05575	-0.986725	-1.18321	-0.972061	-1.23532	-0.990625	-1.00948	-1.1251	-1.22313	-1.13154	-1.2361	-1.27851	-1.03552	-1.01895	-1.17913	-1.03747	-1.17278	-1.02869	-1.14657	-1.0302	-1.04376	-1.11493	-1.17627	-1.12367	-1.05562	-1.20566	-1.20337	-0.982793	-1.18854	-1.06596	-1.13981	-1.14081	-0.743052	-1.01397	-1.11199	-1.10829	-1.036	-1.1679	-0.999071	-0.82938	-1.1204	-1.03442	-0.979708	-0.921456	-1.10874
-1.1152	-1.18797	-1.19809	-1.27227	-1.18201	-1.02952	-0.960529	-1.154	-0.938895	-1.19759	-0.970917	-0.956969	-1.11147	-1.18889	-1.08717	-1.18659	-1.23763	-1.00321	-1.0004	-1.14637	-0.993352	-1.13037	-0.98104	-1.10192	-1.00977	-1.00726	-1.07933	-1.11806	-1.09056	-1.01932	-1.16049	-1.16927	-0.943555	-1.14996	-1.02845	-1.10943	-1.1083	-0.737788	-0.988658	-1.08091	-1.07697	-1.00552	-1.11592	-0.965109	-0.792362	-1.08486	-0.999828	-0.952341	-0.889937	-1.058
-1.09371	-1.17296	-1.17623	-1.24803	-1.15491	-1.00187	-0.931583	-1.12179	-0.906955	-1.15853	-0.94744	-0.901786	-1.09661	-1.15422	-1.04205	-1.13397	-1.19593	-0.971254	-0.979547	-1.11237	-0.945403	-1.08785	-0.9322	-1.05736	-0.986683	-0.969465	-1.04119	-1.05854	-1.05521	-0.982577	-1.11296	-1.13275	-0.902191	-1.10772	-0.989852	-1.07705	-1.07603	-0.734447	-0.962545	-1.04967	-1.0432	-0.976052	-1.05796	-0.92874	-0.754255	-1.04865	-0.96459	-0.922434	-0.858819	-1.00379
-1.07139	-1.15749	-1.15258	-1.22158	-1.12639	-0.97368	-0.901122	-1.08684	-0.875872	-1.11832	-0.919421	-0.845383	-1.07959	-1.11991	-0.996418	-1.07894	-1.15386	-0.939117	-0.956791	-1.07761	-0.895215	-1.04573	-0.883234	-1.01341	-0.961268	-0.930994	-1.00082	-0.998852	-1.0188	-0.944774	-1.06461	-1.09349	-0.857553	-1.06291	-0.949952	-1.04266	-1.04387	-0.73247	-0.936141	-1.01803	-1.00714	-0.948443	-0.99446	-0.890752	-0.715875	-1.01201	-0.928485	-0.890316	-0.827614	-0.947111
-1.04755	-1.14175	-1.1273	-1.19228	-1.09618	-0.944903	-0.869637	-1.04936	-0.844604	-1.07567	-0.886717	-0.787694	-1.06033	-1.08625	-0.95014	-1.02187	-1.11107	-0.904767	-0.931979	-1.04229	-0.844799	-1.0039	-0.835205	-0.970499	-0.934976	-0.892437	-0.959162	-0.938526	-0.981422	-0.905844	-1.01609	-1.05145	-0.809666	-1.01677	-0.909393	-1.00752	-1.01115	-0.730466	-0.909382	-0.984963	-0.969308	-0.922664	-0.926686	-0.851676	-0.677744	-0.974868	-0.891077	-0.857496	-0.795846	-0.889471
-1.02158	-1.12494	-1.09999	-1.15991	-1.06426	-0.915039	-0.835609	-1.01051	-0.812841	-1.03007	-0.849944	-0.729161	-1.03816	-1.05323	-0.903884	-0.964524	-1.06534	-0.866986	-0.904886	-1.00667	-0.795323	-0.962144	-0.788378	-0.928491	-0.908194	-0.85438	-0.917875	-0.877457	-0.943857	-0.865677	-0.967475	-1.00749	-0.759709	-0.971608	-0.868629	-0.972235	-0.976217	-0.727117	-0.880914	-0.950253	-0.930505	-0.898296	-0.856125	-0.811193	-0.640279	-0.937201	-0.851808	-0.825985	-0.763346	-0.832058
-0.99306	-1.10633	-1.07009	-1.12433	-1.03076	-0.883725	-0.797807	-0.970805	-0.780479	-0.981684	-0.810082	-0.671028	-1.01236	-1.02022	-0.858068	-0.908449	-1.0155	-0.825693	-0.875583	-0.970543	-0.746594	-0.919837	-0.741584	-0.886328	-0.88076	-0.816728	-0.87756	-0.816015	-0.906116	-0.824145	-0.918733	-0.962418	-0.709503	-0.92848	-0.827944	-0.93704	-0.938605	-0.721785	-0.849854	-0.913907	-0.891132	-0.874328	-0.783915	-0.769269	-0.603301	-0.898773	-0.81045	-0.796165	-0.730711	-0.775849
-0.963272	-1.08514	-1.03744	-1.08515	-0.996218	-0.850607	-0.756562	-0.930442	-0.74746	-0.931103	-0.768258	-0.614789	-0.982695	-0.98581	-0.812852	-0.854833	-0.961586	-0.781576	-0.844206	-0.932767	-0.699166	-0.875554	-0.693778	-0.842961	-0.852552	-0.778009	-0.838164	-0.754673	-0.867657	-0.781333	-0.869265	-0.917095	-0.660197	-0.887568	-0.787589	-0.902068	-0.898541	-0.715133	-0.815966	-0.876074	-0.850819	-0.84886	-0.711858	-0.726229	-0.566223	-0.85886	-0.767122	-0.767478	-0.699668	-0.721571
-0.932607	-1.06008	-1.00216	-1.04283	-0.962459	-0.815085	-0.713191	-0.889684	-0.713829	-0.879255	-0.726126	-0.561687	-0.949423	-0.949619	-0.768291	-0.804348	-0.904503	-0.735756	-0.810742	-0.893403	-0.65288	-0.828634	-0.644471	-0.79761	-0.823108	-0.737264	-0.799393	-0.693875	-0.828015	-0.73736	-0.817107	-0.872349	-0.611569	-0.84865	-0.747364	-0.866891	-0.856683	-0.707951	-0.779491	-0.837114	-0.809754	-0.820581	-0.641847	-0.682615	-0.52845	-0.817614	-0.722226	-0.739155	-0.670915	-0.668835
-0.901011	-1.03108	-0.964813	-0.997295	-0.929877	-0.777062	-0.669297	-0.848265	-0.679647	-0.826698	-0.684412	-0.511704	-0.913311	-0.911117	-0.72407	-0.75629	-0.845631	-0.689066	-0.775961	-0.852727	-0.606852	-0.779154	-0.593453	-0.749712	-0.791135	-0.694449	-0.760539	-0.633662	-0.786788	-0.692245	-0.761055	-0.828144	-0.564361	-0.810701	-0.706148	-0.830035	-0.813944	-0.699005	-0.741065	-0.797235	-0.767708	-0.78855	-0.575594	-0.639038	-0.48967	-0.775416	-0.676709	-0.710291	-0.64438	-0.615166
-0.868522	-0.997907	-0.927232	-0.948477	-0.897944	-0.736461	-0.625863	-0.804792	-0.644891	-0.773164	-0.643309	-0.462729	-0.876	-0.869836	-0.67926	-0.707548	-0.785892	-0.641432	-0.74024	-0.811105	-0.56013	-0.727738	-0.540825	-0.699093	-0.756382	-0.650046	-0.720166	-0.573158	-0.743352	-0.646684	-0.701613	-0.782979	-0.51919	-0.771307	-0.66325	-0.790762	-0.770757	-0.686194	-0.701324	-0.756253	-0.724215	-0.75229	-0.514166	-0.595697	-0.449878	-0.732778	-0.631354	-0.67981	-0.619597	-0.559198
-0.834754	-0.960553	-0.889913	-0.896752	-0.865998	-0.693417	-0.582672	-0.758938	-0.609436	-0.719313	-0.602828	-0.413421	-0.837828	-0.825903	-0.633361	-0.655279	-0.725	-0.592843	-0.703814	-0.769022	-0.512094	-0.675337	-0.487043	-0.646258	-0.719007	-0.604776	-0.677421	-0.511878	-0.698103	-0.601214	-0.640414	-0.736035	-0.476045	-0.729031	-0.618668	-0.748714	-0.726532	-0.667903	-0.660704	-0.714457	-0.679029	-0.712063	-0.456915	-0.551998	-0.409345	-0.690269	-0.586822	-0.647504	-0.595656	-0.501639
-0.798338	-0.919609	-0.8526	-0.842401	-0.833184	-0.648405	-0.540271	-0.710999	-0.573005	-0.665724	-0.562391	-0.364335	-0.798554	-0.779757	-0.58613	-0.598702	-0.663119	-0.543594	-0.667025	-0.726543	-0.462339	-0.622554	-0.433023	-0.592886	-0.679521	-0.559189	-0.631987	-0.450688	-0.65222	-0.556231	-0.579408	-0.686788	-0.434292	-0.683846	-0.572825	-0.703881	-0.681021	-0.643878	-0.620296	-0.671861	-0.632113	-0.668697	-0.400168	-0.507974	-0.368885	-0.647984	-0.543545	-0.613259	-0.571043	-0.444206
-0.758646	-0.875583	-0.814988	-0.785053	-0.798286	-0.601798	-0.499423	-0.66165	-0.535327	-0.612769	-0.520182	-0.316743	-0.758063	-0.731906	-0.537497	-0.538335	-0.600748	-0.49413	-0.62979	-0.682822	-0.41066	-0.569187	-0.379905	-0.541174	-0.638751	-0.513401	-0.584017	-0.391061	-0.607297	-0.512007	-0.519619	-0.634922	-0.39292	-0.636569	-0.526336	-0.656728	-0.633919	-0.61585	-0.580705	-0.628356	-0.583511	-0.623636	-0.340498	-0.464131	-0.329634	-0.60519	-0.501233	-0.577141	-0.544285	-0.388617
-0.715104	-0.828319	-0.7764	-0.725653	-0.760964	-0.553426	-0.460687	-0.611772	-0.496294	-0.560716	-0.475311	-0.271685	-0.715938	-0.683505	-0.487614	-0.475426	-0.538485	-0.444916	-0.591124	-0.637428	-0.357969	-0.515312	-0.328466	-0.491714	-0.59712	-0.46771	-0.534124	-0.334207	-0.564712	-0.468308	-0.460353	-0.58061	-0.350185	-0.588356	-0.479637	-0.607808	-0.584928	-0.586386	-0.542151	-0.583958	-0.53397	-0.578871	-0.277773	-0.421109	-0.292508	-0.561571	-0.458371	-0.53949	-0.514089	-0.335572
-0.667408	-0.778751	-0.735418	-0.665091	-0.720805	-0.503651	-0.424338	-0.561715	-0.456074	-0.509298	-0.428307	-0.229449	-0.670945	-0.6351	-0.436749	-0.411482	-0.476899	-0.396094	-0.550943	-0.590153	-0.30591	-0.460919	-0.279156	-0.444113	-0.554123	-0.422324	-0.482943	-0.280383	-0.524553	-0.423955	-0.401216	-0.524342	-0.303575	-0.540023	-0.432713	-0.557494	-0.534051	-0.556341	-0.504663	-0.538657	-0.484258	-0.535019	-0.213595	-0.379425	-0.257559	-0.516754	-0.413685	-0.500562	-0.479523	-0.283918
-0.615888	-0.727401	-0.691757	-0.604237	-0.677548	-0.452984	-0.390017	-0.510676	-0.415283	-0.457233	-0.380517	-0.189067	-0.623255	-0.586811	-0.3852	-0.34821	-0.416024	-0.347218	-0.509469	-0.540979	-0.255971	-0.405892	-0.232037	-0.397669	-0.509908	-0.377328	-0.43089	-0.22849	-0.484982	-0.377988	-0.342082	-0.46666	-0.252565	-0.491671	-0.385639	-0.506655	-0.48151	-0.525932	-0.467785	-0.492332	-0.435145	-0.491899	-0.149881	-0.339051	-0.223466	-0.470339	-0.366712	-0.4602	-0.440392	-0.23179
-0.56117	-0.674652	-0.645269	-0.543963	-0.631387	-0.402042	-0.356529	-0.458175	-0.375017	-0.403673	-0.333424	-0.148443	-0.573407	-0.538538	-0.333274	-0.287265	-0.354747	-0.29852	-0.467077	-0.490171	-0.208551	-0.350192	-0.186557	-0.351383	-0.464552	-0.332745	-0.378681	-0.177099	-0.444546	-0.330135	-0.282743	-0.408443	-0.198297	-0.443214	-0.338518	-0.455793	-0.427657	-0.495444	-0.430243	-0.445623	-0.387245	-0.449082	-0.0881641	-0.29907	-0.188635	-0.422191	-0.317543	-0.418336	-0.397497	-0.178406
-0.503808	-0.621059	-0.596025	-0.484164	-0.582708	-0.351482	-0.323197	-0.404158	-0.335703	-0.348643	-0.28769	-0.106686	-0.522212	-0.489782	-0.281055	-0.229319	-0.292388	-0.250642	-0.424251	-0.438083	-0.162534	-0.293786	-0.141104	-0.303719	-0.418079	-0.288439	-0.326586	-0.12534	-0.402027	-0.280575	-0.223028	-0.350672	-0.142704	-0.394145	-0.291427	-0.405171	-0.373647	-0.46431	-0.391426	-0.398828	-0.340404	-0.405732	-0.0291777	-0.2586	-0.152263	-0.372472	-0.266713	-0.374705	-0.353005	-0.123514
-0.445095	-0.566567	-0.544513	-0.422614	-0.53192	-0.301374	-0.289877	-0.348809	-0.297348	-0.292649	-0.242415	-0.063572	-0.470644	-0.439333	-0.228541	-0.17421	-0.22962	-0.204281	-0.381121	-0.385092	-0.116941	-0.236352	-0.0938581	-0.253693	-0.370673	-0.244006	-0.274566	-0.0725447	-0.356326	-0.22979	-0.162906	-0.294306	-0.0874759	-0.343731	-0.244433	-0.354931	-0.320432	-0.430136	-0.351332	-0.352029	-0.293065	-0.360026	0.0277903	-0.217273	-0.113981	-0.321627	-0.214953	-0.329069	-0.309351	-0.0671431
-0.386089	-0.50966	-0.491115	-0.357649	-0.479986	-0.250559	-0.256557	-0.292513	-0.259814	-0.236348	-0.196497	-0.0191252	-0.418916	-0.386422	-0.17576	-0.121217	-0.16774	-0.159892	-0.336985	-0.332226	-0.0708248	-0.177807	-0.0444425	-0.201228	-0.322372	-0.199397	-0.222497	-0.0183064	-0.306963	-0.178333	-0.102344	-0.239955	-0.0335368	-0.291448	-0.197519	-0.30477	-0.268751	-0.391908	-0.31029	-0.305283	-0.243788	-0.310806	0.0829373	-0.174973	-0.0738089	-0.270466	-0.163017	-0.281484	-0.26741	-0.00998808
-0.327729	-0.450053	-0.43562	-0.2894	-0.427025	-0.198369	-0.223222	-0.235606	-0.222651	-0.180181	-0.149424	0.0258119	-0.365567	-0.330796	-0.122674	-0.0693267	-0.107894	-0.117304	-0.291373	-0.279986	-0.0231354	-0.118888	0.00662165	-0.146877	-0.27261	-0.154876	-0.170058	0.0369756	-0.254475	-0.126669	-0.0413589	-0.187338	0.0180829	-0.237327	-0.150462	-0.253353	-0.219035	-0.349899	-0.268785	-0.258364	-0.192111	-0.258384	0.136385	-0.131748	-0.032389	-0.219558	-0.111677	-0.232192	-0.22718	0.046062
-0.270788	-0.388463	-0.378297	-0.219047	-0.3728	-0.145176	-0.189923	-0.178174	-0.184898	-0.124065	-0.100957	0.0686533	-0.309508	-0.272756	-0.0689973	-0.0169595	-0.0504319	-0.0752547	-0.244251	-0.228505	0.0268161	-0.0607827	0.0584881	-0.091481	-0.221312	-0.110817	-0.116268	0.0915396	-0.200727	-0.0752679	0.0191429	-0.13469	0.0663708	-0.182243	-0.103275	-0.199614	-0.170857	-0.305194	-0.227137	-0.210361	-0.138189	-0.204087	0.188505	-0.0879292	0.0086976	-0.169335	-0.0615748	-0.181539	-0.188288	0.0990934
-0.214988	-0.326147	-0.31931	-0.148105	-0.317239	-0.0918624	-0.156881	-0.120771	-0.145999	-0.0676708	-0.0510961	0.106844	-0.250528	-0.213135	-0.0146659	0.0375433	0.00558419	-0.032118	-0.19588	-0.177778	0.0788085	-0.00452695	0.110228	-0.0356574	-0.169186	-0.067513	-0.0602781	0.143867	-0.14789	-0.0245161	0.0778144	-0.0803166	0.110855	-0.127924	-0.0562645	-0.143805	-0.122256	-0.25923	-0.185317	-0.160526	-0.0826	-0.149585	0.239298	-0.0443279	0.047944	-0.120064	-0.0131299	-0.130706	-0.149748	0.147981
-0.157953	-0.26444	-0.258863	-0.0775707	-0.260156	-0.039321	-0.123843	-0.0639957	-0.105712	-0.010959	-0.000265534	0.139746	-0.188992	-0.152689	0.0399341	0.0939627	0.0615468	0.0127175	-0.146714	-0.127397	0.131591	0.0496698	0.160967	0.0207888	-0.117358	-0.0249629	-0.00256877	0.193258	-0.0972529	0.0253248	0.133635	-0.023814	0.151906	-0.0755156	-0.00984613	-0.0869985	-0.0713184	-0.212737	-0.143262	-0.108721	-0.0261188	-0.0958365	0.287723	-0.00166576	0.0844931	-0.0714918	0.0336028	-0.0805731	-0.109205	0.192308
-0.0978891	-0.203733	-0.197342	-0.00711265	-0.200868	0.0120935	-0.0902667	-0.00836783	-0.0640144	0.0459595	0.0504596	0.16811	-0.125679	-0.0914946	0.0941787	0.150901	0.118033	0.0592618	-0.0971279	-0.0761326	0.184246	0.103089	0.210523	0.0787223	-0.0668682	0.0173318	0.0555348	0.239618	-0.0495065	0.0741742	0.186522	0.0344284	0.190593	-0.0257046	0.0356655	-0.0304671	-0.017449	-0.164469	-0.100679	-0.0552485	0.030453	-0.0424323	0.332788	0.0398719	0.118011	-0.0223082	0.0790485	-0.0317723	-0.064687	0.23241
-0.0350473	-0.142529	-0.134884	0.0639144	-0.139744	0.0631446	-0.0555504	0.0457893	-0.0210923	0.102934	0.0997146	0.193388	-0.0613126	-0.029892	0.147495	0.206798	0.175241	0.107228	-0.0472722	-0.0230526	0.235413	0.157396	0.258649	0.13831	-0.0179447	0.0601236	0.112623	0.28342	-0.00469781	0.12226	0.237785	0.0936066	0.229023	0.0212955	0.0802708	0.0250457	0.039101	-0.112826	-0.0571716	-0.000672269	0.0863843	0.0109404	0.373686	0.0804464	0.148733	0.028827	0.124469	0.0153074	-0.0164408	0.26937
0.0291789	-0.0795167	-0.0709057	0.135029	-0.0775234	0.114957	-0.0192681	0.0987016	0.0227698	0.159791	0.146505	0.217103	0.00391914	0.0313811	0.199771	0.260643	0.233182	0.155902	0.00229084	0.0318578	0.283553	0.212972	0.305191	0.199213	0.0305922	0.103818	0.168018	0.325517	0.0381071	0.17046	0.289164	0.152812	0.27	0.066222	0.124517	0.0798553	0.0975819	-0.0579649	-0.0124809	0.0545004	0.140941	0.0644659	0.410006	0.120379	0.177468	0.0820522	0.171339	0.0610884	0.0338498	0.305384
0.0931387	-0.014501	-0.00561961	0.205246	-0.0151656	0.167571	0.018424	0.151676	0.0673708	0.216381	0.190217	0.240393	0.0695259	0.091557	0.251949	0.312198	0.291383	0.203884	0.0511311	0.0880442	0.327769	0.269518	0.350261	0.260885	0.0798777	0.148584	0.222324	0.367332	0.0814498	0.219775	0.341464	0.211241	0.313875	0.11155	0.169206	0.134449	0.156992	-0.00115083	0.0333528	0.11015	0.193528	0.118416	0.44204	0.160035	0.205852	0.136747	0.219791	0.107551	0.0841372	0.343284
0.155827	0.0521144	0.0602949	0.273719	0.0463899	0.220466	0.056191	0.206201	0.112731	0.27251	0.230766	0.264174	0.134494	0.150215	0.305488	0.361844	0.348628	0.250079	0.0990066	0.144747	0.368352	0.326513	0.394079	0.32273	0.130202	0.194393	0.276305	0.410944	0.127956	0.270026	0.395025	0.268419	0.359297	0.160167	0.214657	0.188765	0.216188	0.0560476	0.0798528	0.166243	0.243931	0.172998	0.470587	0.199791	0.235741	0.192011	0.269108	0.156585	0.133119	0.383971
0.217733	0.11964	0.12594	0.340121	0.107069	0.27306	0.092098	0.262406	0.158834	0.327678	0.268845	0.289197	0.197658	0.207582	0.36041	0.410269	0.404116	0.29402	0.145831	0.201418	0.407181	0.383244	0.437063	0.384284	0.181443	0.240908	0.330145	0.457003	0.178484	0.320351	0.44988	0.323801	0.404404	0.213049	0.260897	0.242587	0.274272	0.112468	0.12611	0.222362	0.292527	0.228231	0.49686	0.239879	0.267734	0.247069	0.318332	0.208556	0.180965	0.427131
0.279996	0.187405	0.190469	0.40496	0.168643	0.324822	0.125741	0.31963	0.205562	0.381318	0.306396	0.316002	0.25818	0.265019	0.415916	0.458536	0.457158	0.335706	0.191876	0.25817	0.446493	0.438789	0.480031	0.444912	0.233264	0.287332	0.383874	0.505159	0.232646	0.369848	0.505403	0.377025	0.44769	0.269894	0.307797	0.295775	0.330599	0.167809	0.171563	0.277909	0.340776	0.284121	0.523152	0.280282	0.301604	0.301601	0.36664	0.262888	0.228303	0.471974
0.342459	0.255027	0.253804	0.468781	0.232984	0.375288	0.157673	0.377023	0.252713	0.433113	0.345744	0.344827	0.316191	0.324174	0.4711	0.507707	0.507291	0.3755	0.238128	0.31556	0.487406	0.492702	0.522546	0.503468	0.285179	0.332897	0.437506	0.554614	0.289281	0.417965	0.559979	0.428181	0.488248	0.329683	0.355006	0.348255	0.384816	0.221342	0.215886	0.332381	0.390496	0.340631	0.551091	0.320828	0.336729	0.355614	0.413494	0.318603	0.275363	0.517201
0.404381	0.322075	0.317524	0.531112	0.300379	0.424224	0.18873	0.433847	0.300113	0.483192	0.38765	0.375352	0.37343	0.385236	0.525234	0.558	0.554566	0.414006	0.285606	0.373478	0.530388	0.544333	0.563529	0.558749	0.336667	0.377151	0.49089	0.604255	0.346911	0.464867	0.612529	0.477693	0.525596	0.390903	0.401909	0.400211	0.436972	0.27191	0.25896	0.385712	0.441733	0.396709	0.581823	0.361312	0.372172	0.408699	0.458769	0.374702	0.322332	0.560726
0.465111	0.387719	0.383412	0.591161	0.370139	0.471223	0.219871	0.489775	0.347731	0.532521	0.431905	0.406691	0.43159	0.447437	0.578092	0.608428	0.599495	0.45214	0.334352	0.431436	0.575332	0.593116	0.602106	0.61007	0.387466	0.419897	0.543831	0.652711	0.403943	0.511402	0.66229	0.526534	0.559558	0.451637	0.448142	0.452215	0.487563	0.31854	0.301143	0.43872	0.493504	0.450781	0.615973	0.401623	0.406443	0.460353	0.502373	0.430469	0.369387	0.601594
0.524195	0.451087	0.451527	0.648452	0.441168	0.515982	0.252264	0.545205	0.395267	0.582714	0.477857	0.439173	0.49084	0.509649	0.630207	0.658443	0.643255	0.490865	0.383824	0.488936	0.621268	0.638966	0.63792	0.657764	0.436965	0.461209	0.596661	0.699532	0.459141	0.557646	0.708838	0.576309	0.590604	0.510614	0.493317	0.503727	0.53796	0.360834	0.343731	0.492322	0.544656	0.501633	0.65271	0.442065	0.438391	0.510325	0.544449	0.485688	0.416443	0.639676
0.581447	0.511705	0.520949	0.702965	0.512416	0.558525	0.286823	0.59986	0.442209	0.634103	0.52441	0.473242	0.550588	0.570892	0.681128	0.706888	0.687819	0.530177	0.433363	0.545653	0.6662	0.682264	0.671401	0.70398	0.484499	0.501476	0.648672	0.744254	0.511642	0.603344	0.752344	0.62717	0.61986	0.56679	0.537101	0.553651	0.589831	0.399345	0.388193	0.546192	0.59426	0.549148	0.688667	0.483585	0.467982	0.558703	0.585427	0.539893	0.463035	0.675429
0.637005	0.569825	0.590534	0.755404	0.583366	0.599139	0.324003	0.653174	0.488017	0.686266	0.569825	0.509116	0.610076	0.630794	0.729991	0.752273	0.733727	0.569531	0.482445	0.601667	0.708945	0.724062	0.704079	0.75181	0.529775	0.541737	0.698649	0.786559	0.561072	0.648301	0.793463	0.67835	0.648289	0.61944	0.579404	0.601142	0.642974	0.436051	0.4349	0.599383	0.641792	0.594913	0.721173	0.526275	0.495968	0.606238	0.625657	0.592572	0.508565	0.70969
0.690247	0.627023	0.659364	0.807558	0.653868	0.638425	0.363797	0.704782	0.532312	0.738615	0.613035	0.546771	0.668612	0.689504	0.776226	0.793658	0.780627	0.608354	0.53094	0.657198	0.748369	0.766158	0.736552	0.801834	0.57299	0.583409	0.745729	0.826565	0.60771	0.692262	0.833663	0.728895	0.676353	0.668457	0.620434	0.64594	0.696105	0.473327	0.483496	0.651039	0.687505	0.64105	0.749657	0.569662	0.523407	0.654156	0.665399	0.643468	0.551873	0.743114
0.74037	0.685522	0.727265	0.859928	0.722926	0.677513	0.405797	0.75457	0.575215	0.790419	0.65369	0.585773	0.72578	0.746353	0.819685	0.831174	0.827895	0.646221	0.579256	0.711657	0.783623	0.808863	0.768984	0.853226	0.615076	0.626626	0.789751	0.864664	0.652397	0.734886	0.875379	0.777953	0.705244	0.714511	0.660979	0.688563	0.747873	0.511611	0.533293	0.700752	0.731407	0.688412	0.774773	0.61317	0.551093	0.702211	0.705549	0.692701	0.59168	0.775885
0.787009	0.745527	0.79484	0.912349	0.78926	0.716644	0.449403	0.802736	0.617869	0.840848	0.691982	0.62525	0.781995	0.80053	0.860749	0.866443	0.874626	0.683005	0.627365	0.76415	0.814736	0.851655	0.801486	0.904861	0.657525	0.670724	0.831544	0.901789	0.697101	0.776418	0.919055	0.824839	0.735075	0.759565	0.702321	0.730167	0.7974	0.550353	0.583498	0.748924	0.773575	0.737203	0.797762	0.656254	0.579385	0.749385	0.745897	0.74103	0.627306	0.808183
0.830312	0.806109	0.861452	0.964618	0.852048	0.755592	0.494105	0.849835	0.661861	0.889948	0.728504	0.664124	0.837134	0.851779	0.900404	0.901897	0.919511	0.719433	0.675031	0.814082	0.842474	0.893913	0.833605	0.955387	0.700688	0.714855	0.872727	0.939654	0.744516	0.816393	0.963885	0.869578	0.765045	0.805863	0.744521	0.771268	0.844566	0.588898	0.633416	0.796714	0.814365	0.787282	0.819966	0.698606	0.608662	0.794753	0.785548	0.789302	0.659095	0.839376
0.87108	0.866169	0.925908	1.01611	0.911379	0.794133	0.539766	0.89558	0.707357	0.937318	0.763921	0.701138	0.890896	0.90034	0.938621	0.938814	0.9622	0.75597	0.722075	0.861423	0.868433	0.934877	0.863823	1.00326	0.744267	0.758266	0.913868	0.977867	0.794519	0.854076	1.00875	0.91213	0.794119	0.853166	0.786921	0.812146	0.890161	0.626403	0.682787	0.8443	0.853971	0.837844	0.842878	0.740402	0.638563	0.837759	0.823664	0.837086	0.688719	0.868445
0.911063	0.924681	0.987338	1.06542	0.969017	0.83188	0.586216	0.939383	0.753698	0.98243	0.798958	0.735047	0.943232	0.947111	0.975002	0.977822	1.0024	0.792923	0.76833	0.907159	0.895128	0.973476	0.891367	1.04861	0.787789	0.800533	0.955041	1.01485	0.845215	0.88908	1.05243	0.952664	0.821588	0.899902	0.828784	0.853037	0.93453	0.66159	0.731108	0.891403	0.892261	0.887053	0.868019	0.781079	0.668199	0.878307	0.859741	0.883365	0.718448	0.894695
0.950864	0.980835	1.04552	1.11233	1.02756	0.868094	0.633156	0.980925	0.800085	1.02511	0.834468	0.765076	0.994129	0.993995	1.00939	1.01905	1.04004	0.830507	0.813675	0.953245	0.923537	1.0097	0.915704	1.09095	0.830597	0.841993	0.996192	1.04913	0.89444	0.921419	1.09368	0.991715	0.847111	0.944503	0.869487	0.893667	0.977961	0.694443	0.777824	0.937784	0.929785	0.933658	0.895393	0.819773	0.696704	0.917092	0.893657	0.927329	0.749723	0.91808
0.990547	1.03497	1.10136	1.15659	1.08691	0.902901	0.680229	1.02014	0.84577	1.06547	0.87009	0.791614	1.04361	1.04133	1.04164	1.06157	1.07549	0.868465	0.858229	1.00001	0.953595	1.04361	0.936605	1.12969	0.871753	0.882469	1.03679	1.07986	0.940645	0.951608	1.13262	1.02966	0.870538	0.985935	0.908665	0.932872	1.02086	0.725371	0.822657	0.98306	0.966188	0.976832	0.923976	0.855902	0.723718	0.954454	0.92589	0.96868	0.783503	0.939574
1.03015	1.08686	1.15672	1.19806	1.14556	0.936522	0.727276	1.05731	0.890367	1.10402	0.904792	0.817214	1.09253	1.08852	1.07141	1.10284	1.10919	0.905724	0.901559	1.04691	0.98469	1.0755	0.954393	1.16478	0.911041	0.921608	1.07554	1.10698	0.983128	0.981045	1.16892	1.06669	0.892115	1.02382	0.946737	0.970205	1.06319	0.755089	0.865754	1.02654	1.00065	1.0162	0.952516	0.889415	0.749681	0.990713	0.956815	1.00805	0.82021	0.961441
1.06918	1.13622	1.2113	1.237	1.20203	0.96927	0.774699	1.09378	0.934482	1.14203	0.937664	0.845151	1.14073	1.13477	1.09957	1.14115	1.14168	0.941352	0.94305	1.09332	1.01556	1.10598	0.969653	1.19643	0.948222	0.959252	1.11215	1.13155	1.02193	1.01019	1.20221	1.10412	0.912629	1.05899	0.983618	1.00528	1.10415	0.784484	0.908078	1.06821	1.03263	1.05209	0.980105	0.921093	0.775563	1.02631	0.986915	1.04737	0.859032	0.984953
1.1062	1.18313	1.26379	1.27371	1.25522	1.00158	0.822554	1.13004	0.977785	1.17938	0.968282	0.875908	1.1875	1.17921	1.12653	1.1754	1.17445	0.974623	0.982368	1.13847	1.04393	1.13536	0.983134	1.2248	0.983216	0.995373	1.14607	1.15423	1.05733	1.03904	1.23263	1.14177	0.933175	1.09234	1.01906	1.03788	1.14359	0.813776	0.950984	1.10776	1.06195	1.08529	1.00663	0.952276	0.802081	1.06126	1.01677	1.08716	0.897062	1.01075
1.14119	1.22772	1.31314	1.30832	1.30463	1.03352	0.869981	1.16614	1.0195	1.21533	0.99693	0.908399	1.23227	1.2209	1.15251	1.20508	1.20737	1.00506	1.01956	1.18131	1.06833	1.16339	0.996391	1.25068	1.01634	1.03017	1.17679	1.17566	1.09021	1.06757	1.26045	1.1785	0.954427	1.12499	1.05304	1.0682	1.18087	0.841401	0.994182	1.14483	1.08874	1.11732	1.03313	0.983013	0.82983	1.09477	1.04649	1.12726	0.931725	1.03901
1.17411	1.27016	1.35872	1.34166	1.3515	1.06445	0.915725	1.20211	1.05907	1.24928	1.02487	0.94122	1.2747	1.26003	1.17786	1.23055	1.23935	1.03267	1.05537	1.22204	1.08823	1.19058	1.01006	1.27389	1.04794	1.06443	1.20438	1.19661	1.12185	1.09536	1.28608	1.21328	0.976737	1.15813	1.08554	1.09662	1.21513	0.865219	1.03652	1.17948	1.11407	1.15062	1.0602	1.01277	0.859164	1.1269	1.07547	1.16737	0.962248	1.06885
1.20493	1.31166	1.40048	1.37378	1.39593	1.09401	0.958801	1.23751	1.09625	1.28081	1.05298	0.972911	1.31502	1.29628	1.20242	1.25282	1.26937	1.05795	1.09154	1.26031	1.10404	1.21669	1.02424	1.29392	1.07841	1.09769	1.22923	1.21709	1.15291	1.12112	1.31113	1.24538	1.00182	1.19187	1.11656	1.12365	1.24604	0.885004	1.07695	1.21189	1.13867	1.1857	1.08811	1.04114	0.889772	1.15728	1.10392	1.20676	0.989029	1.09756
1.2339	1.35192	1.44013	1.40432	1.43765	1.12197	0.999135	1.27112	1.13113	1.30968	1.082	1.00198	1.35498	1.32933	1.225	1.27389	1.29671	1.08233	1.12842	1.29568	1.11699	1.24105	1.03885	1.31069	1.10896	1.12898	1.25199	1.23549	1.18306	1.14444	1.33523	1.27452	1.02931	1.22424	1.14685	1.15067	1.27377	0.901804	1.11487	1.24246	1.16315	1.22191	1.11701	1.06772	0.920448	1.18542	1.13141	1.24403	1.01319	1.12295
1.26117	1.38986	1.47803	1.43316	1.4768	1.14821	1.0384	1.30283	1.16428	1.33699	1.11242	1.02821	1.39453	1.35949	1.24533	1.29684	1.32094	1.10803	1.1656	1.32809	1.12833	1.26325	1.05332	1.32423	1.13969	1.15759	1.27446	1.25094	1.21301	1.16522	1.35701	1.30141	1.05724	1.25361	1.17613	1.17815	1.29915	0.917135	1.15031	1.27252	1.18808	1.25827	1.14646	1.092	0.950253	1.21115	1.15708	1.27894	1.03613	1.14382
1.28638	1.42474	1.51394	1.46015	1.51323	1.17287	1.07915	1.33231	1.19545	1.36314	1.14389	1.05131	1.43271	1.38713	1.26334	1.32237	1.3428	1.13566	1.20254	1.35769	1.13906	1.2831	1.06598	1.33442	1.16999	1.18327	1.29719	1.26297	1.24205	1.18369	1.37539	1.32633	1.08344	1.27914	1.20365	1.20603	1.32411	0.932328	1.18432	1.30237	1.21324	1.29362	1.17518	1.11458	0.978167	1.23459	1.18039	1.31075	1.05973	1.15973
1.30972	1.45613	1.54789	1.48513	1.54607	1.19622	1.12182	1.35921	1.22413	1.38819	1.17455	1.07118	1.46878	1.41242	1.27912	1.3496	1.36273	1.16483	1.23852	1.38475	1.15136	1.3006	1.07593	1.34283	1.19921	1.20635	1.32	1.27145	1.26865	1.20043	1.38973	1.34958	1.10667	1.30059	1.22889	1.23405	1.34957	0.94825	1.2173	1.33179	1.23708	1.32649	1.20183	1.1357	1.0032	1.25592	1.20124	1.33864	1.08637	1.17109
1.33116	1.484	1.57948	1.50958	1.57571	1.21876	1.16572	1.38358	1.25015	1.41232	1.2029	1.08822	1.50211	1.43689	1.29308	1.37721	1.38123	1.19483	1.27253	1.41054	1.16576	1.31683	1.0833	1.3506	1.22678	1.22823	1.34254	1.27686	1.29164	1.21587	1.39981	1.37164	1.12693	1.31839	1.25164	1.26162	1.3758	0.966139	1.24941	1.36055	1.25874	1.35673	1.22501	1.15557	1.0249	1.2763	1.21999	1.36236	1.1165	1.17907
1.35063	1.51	1.60726	1.53397	1.60181	1.24189	1.20989	1.4056	1.27357	1.4353	1.22798	1.10279	1.53237	1.46096	1.30555	1.40365	1.39898	1.22463	1.30468	1.43505	1.18154	1.33245	1.08889	1.35863	1.25204	1.24952	1.36406	1.27984	1.31062	1.22999	1.40691	1.39261	1.144	1.33346	1.27189	1.28759	1.4029	0.987243	1.28091	1.38818	1.27781	1.38423	1.24357	1.17452	1.04366	1.29635	1.23782	1.38222	1.14923	1.186
1.36832	1.53477	1.63121	1.55818	1.62393	1.26606	1.25318	1.42564	1.29457	1.45591	1.2493	1.11464	1.56122	1.48431	1.31651	1.42694	1.41604	1.25278	1.33459	1.45764	1.19756	1.34796	1.09382	1.36778	1.27517	1.27045	1.38303	1.28086	1.32579	1.24348	1.41187	1.41185	1.15779	1.34724	1.29066	1.31166	1.43017	1.01246	1.31162	1.4138	1.29414	1.40909	1.25711	1.19253	1.06125	1.31645	1.25529	1.39919	1.18314	1.19494
1.38439	1.55854	1.65111	1.58209	1.64215	1.29109	1.29422	1.44506	1.31452	1.47388	1.26703	1.12321	1.5883	1.50654	1.32683	1.44645	1.43133	1.27889	1.36176	1.4779	1.21251	1.36384	1.09876	1.37767	1.29635	1.29127	1.39886	1.28118	1.33813	1.25653	1.41549	1.4298	1.16877	1.3621	1.3084	1.33363	1.45563	1.04207	1.34051	1.43776	1.30808	1.43191	1.26638	1.20856	1.08013	1.33687	1.27266	1.41546	1.21681	1.20658
1.39891	1.58161	1.66688	1.6051	1.6567	1.31662	1.33251	1.46394	1.33395	1.48894	1.28197	1.12836	1.61225	1.52703	1.33678	1.46194	1.44464	1.3026	1.38612	1.4955	1.2247	1.37984	1.10357	1.38562	1.31597	1.31159	1.41144	1.28195	1.34896	1.26903	1.4187	1.44606	1.17791	1.37942	1.32539	1.35345	1.47838	1.07532	1.36732	1.46005	1.32016	1.45309	1.27391	1.22209	1.10097	1.35728	1.29011	1.43138	1.24908	1.2201
1.41325	1.60358	1.67904	1.62591	1.6675	1.34201	1.36743	1.48165	1.35299	1.50091	1.29589	1.13051	1.63211	1.5446	1.34625	1.47374	1.4555	1.32369	1.4078	1.50989	1.23312	1.39448	1.10837	1.39004	1.33465	1.32988	1.42116	1.28415	1.36	1.28096	1.42146	1.45981	1.18605	1.39979	1.34194	1.37148	1.49787	1.11045	1.39157	1.48054	1.33109	1.47267	1.28333	1.23306	1.12342	1.37634	1.3073	1.44633	1.27968	1.23432
1.42791	1.62265	1.68805	1.64449	1.67618	1.36627	1.39856	1.49772	1.37181	1.5101	1.31139	1.13051	1.64732	1.5592	1.35519	1.48281	1.46341	1.34236	1.42709	1.52205	1.23779	1.40704	1.11301	1.39051	1.35264	1.34538	1.42891	1.28847	1.37283	1.29207	1.42163	1.47059	1.19407	1.42324	1.35788	1.38807	1.5139	1.14654	1.4128	1.49936	1.34243	1.49146	1.29589	1.2418	1.14674	1.3936	1.32302	1.45981	1.30853	1.24778
1.44285	1.63828	1.69385	1.66026	1.68377	1.38939	1.42604	1.51168	1.39004	1.51689	1.32931	1.12909	1.65764	1.57074	1.36333	1.48997	1.46833	1.35895	1.44513	1.53256	1.23972	1.41704	1.11707	1.38735	1.36956	1.35778	1.43535	1.29451	1.38752	1.30172	1.41808	1.47834	1.20395	1.4487	1.37202	1.40358	1.52684	1.18285	1.43102	1.51653	1.35474	1.50907	1.31139	1.24898	1.16985	1.4087	1.3369	1.47107	1.33576	1.25854
1.45796	1.65001	1.69803	1.67248	1.69095	1.41093	1.45038	1.52301	1.40621	1.52151	1.34939	1.12635	1.66429	1.57939	1.36995	1.49557	1.47053	1.37393	1.46194	1.54184	1.24042	1.42429	1.12025	1.38142	1.38589	1.36712	1.44063	1.29999	1.40181	1.31007	1.41046	1.48312	1.21549	1.47355	1.384	1.41926	1.53733	1.21852	1.44657	1.53177	1.3679	1.52453	1.32905	1.25509	1.19102	1.4214	1.34847	1.47894	1.36182	1.26579
1.47272	1.65758	1.70127	1.6809	1.6984	1.4303	1.47245	1.53261	1.4199	1.52522	1.37092	1.12327	1.66736	1.58584	1.37542	1.50086	1.47042	1.38822	1.4771	1.55048	1.24095	1.42905	1.12243	1.37361	1.40141	1.37394	1.44577	1.30319	1.41418	1.31743	1.39902	1.4861	1.227	1.49611	1.39363	1.43511	1.5463	1.2528	1.46	1.5457	1.38155	1.53714	1.34726	1.26017	1.20926	1.4319	1.35732	1.48411	1.38709	1.26974
1.48595	1.66142	1.70371	1.68572	1.70575	1.44724	1.49383	1.54074	1.43109	1.52859	1.39266	1.12144	1.66661	1.59062	1.37987	1.50558	1.46937	1.40155	1.49035	1.55836	1.24158	1.43179	1.12361	1.3646	1.41547	1.37886	1.45101	1.30382	1.42361	1.32426	1.38461	1.48804	1.2368	1.51561	1.40086	1.45042	1.55569	1.2857	1.47299	1.55818	1.39499	1.5466	1.36299	1.26506	1.2241	1.44058	1.36354	1.48683	1.41209	1.27135
1.49777	1.66212	1.7056	1.68763	1.71056	1.46183	1.51464	1.5474	1.44006	1.53178	1.41267	1.1226	1.66238	1.59364	1.38335	1.50856	1.46831	1.41312	1.50144	1.56389	1.24339	1.43326	1.1243	1.3556	1.42767	1.38231	1.45594	1.30235	1.4294	1.33105	1.36806	1.48962	1.24381	1.53181	1.40603	1.46447	1.56576	1.31884	1.48624	1.56873	1.4069	1.55312	1.37423	1.27026	1.23564	1.44793	1.36747	1.48725	1.43796	1.27194
1.50781	1.66019	1.70647	1.68867	1.71176	1.47465	1.53426	1.5528	1.44738	1.5349	1.43005	1.12799	1.65474	1.59614	1.38603	1.50883	1.46796	1.42235	1.50981	1.56632	1.2461	1.43506	1.12522	1.34701	1.43779	1.38558	1.46016	1.29969	1.43154	1.33789	1.34976	1.49144	1.24723	1.54508	1.40953	1.47667	1.57582	1.35371	1.49992	1.57713	1.41684	1.55831	1.38039	1.27606	1.24454	1.45536	1.36965	1.48586	1.46365	1.27227
1.5155	1.65749	1.70452	1.68909	1.70919	1.48704	1.5522	1.55675	1.45344	1.53759	1.44437	1.13726	1.64269	1.59855	1.38787	1.50579	1.46881	1.42897	1.51622	1.56548	1.24846	1.43773	1.12717	1.33874	1.44579	1.38918	1.46315	1.29674	1.43076	1.34415	1.33107	1.49328	1.24648	1.55626	1.4115	1.48649	1.58507	1.38931	1.51403	1.58327	1.42461	1.56303	1.38192	1.2826	1.25159	1.46327	1.37142	1.48268	1.4869	1.27188
1.52058	1.6548	1.69949	1.6882	1.70329	1.49886	1.56794	1.55813	1.45795	1.5384	1.45564	1.14741	1.62686	1.60066	1.38828	1.49907	1.47047	1.43291	1.52119	1.56157	1.24919	1.44115	1.13077	1.33059	1.45244	1.39312	1.46403	1.29446	1.42843	1.34966	1.31301	1.4934	1.24228	1.56705	1.41296	1.49429	1.59263	1.42332	1.52794	1.58705	1.43027	1.56783	1.38005	1.28958	1.2576	1.47141	1.37339	1.47638	1.50581	1.27027
1.52307	1.65221	1.69159	1.68549	1.69504	1.5093	1.58073	1.55654	1.46097	1.53697	1.46439	1.15549	1.60805	1.60215	1.38713	1.48952	1.47087	1.43523	1.52518	1.5553	1.24751	1.44495	1.13591	1.32214	1.45825	1.39728	1.46273	1.29422	1.42658	1.35413	1.29627	1.49087	1.2365	1.57968	1.41437	1.50031	1.59745	1.45365	1.53995	1.5896	1.43425	1.5732	1.37608	1.2959	1.26395	1.47937	1.37572	1.46638	1.51971	1.26679
1.52316	1.64975	1.6813	1.6803	1.68522	1.51768	1.59134	1.55187	1.46267	1.53342	1.47128	1.16075	1.58725	1.60246	1.3843	1.47832	1.46867	1.43682	1.52879	1.54728	1.24317	1.44844	1.14147	1.31265	1.46363	1.40115	1.45962	1.2961	1.42661	1.35721	1.28127	1.48533	1.23115	1.594	1.41587	1.50487	1.59973	1.47957	1.54932	1.59131	1.43694	1.5787	1.3712	1.30113	1.27075	1.48652	1.37839	1.45258	1.52968	1.26073
1.52166	1.64676	1.66946	1.67166	1.67403	1.52354	1.60048	1.54431	1.46329	1.52817	1.47705	1.16363	1.56569	1.60037	1.37968	1.46699	1.4635	1.43855	1.53196	1.53766	1.23648	1.45028	1.14648	1.30286	1.46898	1.40349	1.45545	1.29928	1.42945	1.35876	1.26748	1.47685	1.22716	1.60848	1.4175	1.5085	1.59971	1.50272	1.55579	1.59224	1.43863	1.58227	1.36697	1.30526	1.27734	1.49174	1.38085	1.43536	1.53798	1.25181
1.51853	1.64122	1.65648	1.66057	1.66258	1.52664	1.60892	1.5345	1.46323	1.52193	1.48292	1.16499	1.54357	1.5954	1.37344	1.45704	1.45567	1.44122	1.53325	1.52749	1.22825	1.45003	1.15018	1.29309	1.4742	1.40405	1.45112	1.30265	1.43536	1.35888	1.25277	1.46604	1.22394	1.62146	1.41889	1.51135	1.59777	1.52613	1.55953	1.59251	1.44017	1.5827	1.36327	1.3084	1.28301	1.49471	1.38157	1.41556	1.5458	1.24033
1.5134	1.63242	1.64167	1.64723	1.6512	1.52802	1.61745	1.52291	1.46269	1.51505	1.48866	1.16607	1.51862	1.58756	1.36579	1.44858	1.44597	1.44465	1.532	1.51747	1.21982	1.4475	1.15189	1.28334	1.47824	1.40287	1.44697	1.30533	1.4434	1.35799	1.23576	1.45356	1.22152	1.63174	1.41889	1.51279	1.59459	1.55033	1.56117	1.59182	1.44145	1.5794	1.35897	1.31086	1.28711	1.49532	1.37966	1.39384	1.55389	1.22706
1.50618	1.62044	1.62511	1.63151	1.63972	1.52806	1.62604	1.50948	1.46146	1.50714	1.49318	1.16896	1.48962	1.57734	1.35689	1.43914	1.43519	1.44683	1.52806	1.50799	1.21248	1.44278	1.15135	1.27363	1.48081	1.40027	1.44244	1.30692	1.45101	1.35716	1.21628	1.4399	1.21872	1.63908	1.41712	1.5129	1.59042	1.57463	1.5613	1.58897	1.44183	1.57219	1.35302	1.31286	1.2888	1.49371	1.37496	1.37015	1.56286	1.21355
1.49685	1.60596	1.60678	1.61361	1.62788	1.52691	1.63285	1.49488	1.46025	1.49821	1.49554	1.17549	1.45698	1.56569	1.34762	1.42663	1.42407	1.44617	1.52163	1.49934	1.20657	1.43629	1.14893	1.26359	1.48151	1.39675	1.43763	1.30775	1.45623	1.35681	1.1949	1.42634	1.21353	1.64472	1.41353	1.51143	1.58451	1.59828	1.56037	1.58368	1.44074	1.56153	1.34467	1.31447	1.28806	1.49043	1.36796	1.34548	1.57215	1.2015
1.48521	1.59002	1.58664	1.59337	1.61525	1.52485	1.63657	1.47983	1.45954	1.48821	1.4952	1.18572	1.42208	1.55329	1.33838	1.41032	1.41388	1.44218	1.51331	1.49114	1.20075	1.42845	1.14596	1.25218	1.47997	1.39262	1.43213	1.30786	1.45799	1.3569	1.17254	1.41358	1.20448	1.64906	1.40836	1.50798	1.57666	1.62016	1.55968	1.57585	1.43784	1.54818	1.33344	1.31601	1.28555	1.48594	1.35954	1.32076	1.57908	1.19261
1.47225	1.57327	1.56492	1.56949	1.60089	1.52169	1.63663	1.46498	1.45954	1.47708	1.49197	1.19847	1.38665	1.54021	1.3293	1.3903	1.40496	1.43506	1.5036	1.4819	1.19407	1.41958	1.14408	1.2387	1.47621	1.3877	1.42519	1.30729	1.45592	1.35729	1.14996	1.40184	1.19139	1.65225	1.4021	1.50248	1.5666	1.63817	1.55936	1.56553	1.43286	1.53312	1.32006	1.31725	1.28241	1.48042	1.35043	1.29681	1.58176	1.18799
1.45853	1.55538	1.54179	1.54165	1.58509	1.51609	1.63307	1.45092	1.46038	1.46491	1.48679	1.21216	1.3516	1.52754	1.32043	1.36731	1.39698	1.42555	1.49266	1.47095	1.18564	1.41062	1.14391	1.22246	1.47048	1.38222	1.41629	1.30615	1.45046	1.35754	1.12778	1.39109	1.17551	1.65458	1.39511	1.495	1.55405	1.65107	1.5588	1.55317	1.42637	1.51807	1.30586	1.31771	1.27988	1.4748	1.34094	1.27431	1.57923	1.1871
1.44444	1.53652	1.517	1.50983	1.56821	1.50747	1.62649	1.43752	1.46171	1.45179	1.48058	1.22563	1.31605	1.51546	1.31147	1.34245	1.38937	1.41453	1.48139	1.45827	1.17457	1.40145	1.14545	1.20296	1.46318	1.37596	1.40534	1.30445	1.44272	1.35668	1.1069	1.38072	1.15864	1.65582	1.38742	1.48559	1.53908	1.6583	1.55738	1.53912	1.41892	1.50373	1.29256	1.31701	1.27832	1.46916	1.33194	1.25302	1.57126	1.1869
1.43041	1.51663	1.49133	1.47439	1.55069	1.49564	1.61775	1.42337	1.46247	1.43773	1.47438	1.23889	1.27948	1.50351	1.30143	1.31714	1.38146	1.403	1.47029	1.44426	1.16046	1.39133	1.14831	1.18015	1.45545	1.36847	1.39274	1.30207	1.43469	1.35425	1.0872	1.36922	1.14248	1.65473	1.37957	1.47508	1.52197	1.66009	1.55448	1.52329	1.41115	1.49009	1.28168	1.31503	1.27661	1.46303	1.32371	1.23088	1.55861	1.18436
1.41621	1.49553	1.46553	1.43619	1.53305	1.48081	1.6079	1.40792	1.46207	1.42356	1.46917	1.25287	1.24238	1.49107	1.28997	1.29336	1.37245	1.39249	1.45959	1.42953	1.14368	1.37963	1.15171	1.15452	1.44785	1.35947	1.37961	1.29913	1.42908	1.34996	1.06781	1.35565	1.12873	1.65073	1.37157	1.46413	1.50303	1.65748	1.54937	1.50623	1.40372	1.477	1.27325	1.31201	1.27392	1.45594	1.31601	1.20648	1.54249	1.17825
1.40021	1.47319	1.4403	1.39582	1.5153	1.46366	1.59896	1.39124	1.46013	1.40979	1.46488	1.26765	1.20567	1.47754	1.277	1.27234	1.36238	1.38376	1.44944	1.41447	1.12556	1.36593	1.15432	1.1272	1.4406	1.34887	1.36656	1.29492	1.42661	1.34371	1.04778	1.33984	1.11847	1.64297	1.36311	1.45342	1.48363	1.65155	1.5423	1.48832	1.39663	1.46379	1.26479	1.30887	1.26962	1.44744	1.30844	1.17993	1.52444	1.1684
1.38136	1.44959	1.41619	1.35275	1.4966	1.44475	1.59192	1.37371	1.45644	1.39665	1.45955	1.2829	1.17018	1.46213	1.26264	1.25463	1.35129	1.37696	1.43952	1.39907	1.108	1.34992	1.15505	1.1001	1.43377	1.33681	1.35397	1.28831	1.42654	1.33571	1.0265	1.32214	1.11117	1.63065	1.3539	1.44348	1.46465	1.64292	1.53359	1.46984	1.38866	1.44889	1.25388	1.30598	1.26313	1.43689	1.30047	1.15214	1.50693	1.15539
1.35966	1.42466	1.39299	1.30727	1.4765	1.42418	1.58701	1.35584	1.45106	1.38424	1.45161	1.29818	1.13625	1.44453	1.24719	1.24016	1.33926	1.37188	1.42876	1.3835	1.09219	1.33214	1.15344	1.0739	1.42696	1.32405	1.34207	1.27857	1.42755	1.32634	1.00385	1.30327	1.10405	1.61367	1.34369	1.43415	1.44667	1.63303	1.52374	1.45113	1.37895	1.43185	1.23915	1.30344	1.25428	1.42425	1.2913	1.12422	1.49134	1.1406
1.33574	1.39928	1.36906	1.26034	1.45447	1.40277	1.58405	1.33791	1.44427	1.37223	1.44033	1.31301	1.10326	1.42486	1.23093	1.22794	1.32656	1.36776	1.41686	1.36763	1.07884	1.31317	1.14951	1.04855	1.41882	1.31118	1.33052	1.26569	1.42809	1.31608	0.98029	1.28385	1.09469	1.59253	1.33218	1.42395	1.43005	1.62263	1.51338	1.43213	1.36712	1.41286	1.21996	1.30125	1.24342	1.40988	1.28058	1.09688	1.47824	1.12686
1.31059	1.3742	1.34307	1.21331	1.43004	1.38122	1.58211	1.31972	1.43676	1.35956	1.42559	1.32678	1.07082	1.4037	1.21382	1.21562	1.31328	1.36305	1.40386	1.35119	1.06813	1.29368	1.14377	1.02383	1.40851	1.29864	1.31799	1.25067	1.42628	1.30587	0.956261	1.26437	1.08123	1.56844	1.31966	1.41186	1.41432	1.61207	1.50269	1.41192	1.35312	1.39246	1.19647	1.29908	1.23157	1.39452	1.26847	1.07	1.46766	1.11741
1.28488	1.35003	1.3147	1.16751	1.4031	1.36007	1.57919	1.3012	1.42955	1.34569	1.40786	1.33844	1.03933	1.38189	1.19599	1.20132	1.2993	1.35685	1.38995	1.33394	1.05926	1.27442	1.13692	0.999037	1.39586	1.28681	1.30359	1.23541	1.42078	1.29589	0.932312	1.2458	1.0623	1.544	1.30643	1.39763	1.39762	1.60169	1.49099	1.39033	1.33726	1.37143	1.16981	1.29599	1.2204	1.37903	1.25556	1.04315	1.45852	1.11295
1.25836	1.32717	1.28423	1.1232	1.37394	1.33976	1.57439	1.28224	1.42265	1.33017	1.38797	1.34683	1.00945	1.3599	1.1775	1.18452	1.28477	1.34896	1.37547	1.31582	1.04992	1.25544	1.1299	0.972667	1.3812	1.2755	1.28679	1.2208	1.41127	1.28583	0.908934	1.22812	1.0377	1.52042	1.29287	1.38148	1.37893	1.59113	1.47817	1.36771	1.32003	1.35012	1.1425	1.29128	1.2109	1.36374	1.24257	1.01621	1.44783	1.11245
1.2307	1.30534	1.2523	1.07853	1.34343	1.32008	1.5673	1.26268	1.41558	1.3127	1.36727	1.351	0.981645	1.33774	1.1584	1.16548	1.26923	1.33962	1.36061	1.29697	1.0381	1.2355	1.12396	0.944444	1.36519	1.26342	1.2674	1.20712	1.39841	1.27536	0.886114	1.21064	1.0086	1.49814	1.2794	1.36398	1.35776	1.5789	1.4638	1.34464	1.30211	1.32802	1.11771	1.28458	1.20358	1.34801	1.22987	0.989205	1.43348	1.1141
1.20232	1.28296	1.21963	1.03239	1.31341	1.29955	1.55784	1.24245	1.40785	1.29327	1.34778	1.3507	0.955896	1.316	1.1388	1.14492	1.25195	1.32933	1.34518	1.27809	1.0229	1.21371	1.11933	0.914306	1.34843	1.24953	1.24569	1.19445	1.38353	1.26409	0.863036	1.19258	0.977741	1.47731	1.26604	1.34573	1.33395	1.56551	1.44727	1.32178	1.28473	1.30472	1.09707	1.27581	1.19851	1.33166	1.21728	0.962204	1.4152	1.116
1.17402	1.25879	1.18701	0.985151	1.28451	1.27747	1.54633	1.22158	1.39906	1.27218	1.3305	1.34661	0.93131	1.29445	1.11876	1.12376	1.23245	1.31862	1.32909	1.25964	1.00418	1.18971	1.11555	0.882347	1.33126	1.23351	1.22222	1.18212	1.3678	1.25128	0.838998	1.17335	0.948273	1.457	1.25209	1.32726	1.30776	1.55151	1.42833	1.29934	1.26852	1.27988	1.08103	1.26521	1.19497	1.31443	1.20485	0.935386	1.39391	1.11648
1.1466	1.23222	1.15552	0.937826	1.25667	1.25396	1.53325	1.20043	1.38912	1.25023	1.31564	1.3409	0.906066	1.27227	1.09809	1.10325	1.21069	1.308	1.3122	1.24186	0.982522	1.16343	1.11193	0.848935	1.31446	1.21551	1.19781	1.16807	1.35205	1.23672	0.813225	1.15266	0.922262	1.43435	1.23713	1.30955	1.27973	1.53729	1.40711	1.27657	1.25363	1.25322	1.06916	1.25323	1.19096	1.296	1.19225	0.909121	1.3711	1.11452
1.12039	1.20311	1.1255	0.891448	1.22959	1.22959	1.51927	1.17985	1.37899	1.22872	1.30295	1.33673	0.879938	1.2487	1.07704	1.08441	1.1872	1.29811	1.29433	1.22488	0.958999	1.13523	1.10777	0.814308	1.29828	1.19601	1.17375	1.15088	1.33772	1.22067	0.784986	1.13087	0.9009	1.40782	1.22091	1.29295	1.25064	1.52324	1.38401	1.25297	1.23999	1.22474	1.05987	1.24051	1.18481	1.27623	1.17884	0.883972	1.34805	1.10959
1.095	1.17172	1.09673	0.84647	1.20249	1.20504	1.50529	1.16011	1.3688	1.20781	1.29146	1.33519	0.853591	1.22334	1.05601	1.06699	1.16323	1.28855	1.27545	1.20844	0.935494	1.10561	1.10225	0.778019	1.2826	1.17563	1.15063	1.13001	1.32479	1.20379	0.753995	1.10826	0.88426	1.37704	1.20332	1.27733	1.22152	1.50915	1.36014	1.2284	1.22701	1.19471	1.04996	1.22803	1.17576	1.25521	1.16415	0.86065	1.32575	1.10173
1.07037	1.13869	1.06875	0.802155	1.17377	1.18073	1.49098	1.14112	1.35824	1.18703	1.27919	1.3362	0.827726	1.19615	1.03545	1.04996	1.1394	1.2784	1.25568	1.19157	0.91431	1.07511	1.09482	0.739486	1.26714	1.15498	1.12859	1.1056	1.31216	1.18682	0.720604	1.08512	0.870806	1.34243	1.18447	1.26238	1.19256	1.49367	1.33635	1.20295	1.21342	1.16386	1.03669	1.21618	1.16369	1.23307	1.14805	0.839761	1.30563	1.09151
1.04692	1.10515	1.04097	0.75736	1.14264	1.15632	1.47536	1.12263	1.34701	1.16586	1.26497	1.33919	0.803099	1.16751	1.01571	1.03219	1.11607	1.26676	1.2353	1.17354	0.896005	1.04473	1.08569	0.698601	1.25148	1.13488	1.10752	1.07836	1.29857	1.17011	0.685893	1.06185	0.856781	1.30507	1.16463	1.24755	1.16356	1.47596	1.31335	1.17685	1.19841	1.13388	1.019	1.20497	1.14907	1.21033	1.13089	0.821502	1.28748	1.07971
1.02514	1.07247	1.01264	0.712069	1.1087	1.13135	1.45762	1.10424	1.33471	1.14374	1.24833	1.34281	0.78075	1.13789	0.996727	1.01304	1.09347	1.25326	1.21511	1.1539	0.879941	1.01525	1.07564	0.655674	1.23486	1.11578	1.08684	1.04923	1.28308	1.15316	0.651242	1.03848	0.838923	1.26592	1.14418	1.23208	1.13422	1.45512	1.29164	1.15035	1.18171	1.10552	0.996997	1.19427	1.13279	1.1876	1.11328	0.80549	1.26991	1.06751
1.0053	1.04114	0.983555	0.666802	1.07191	1.10571	1.43737	1.08526	1.32052	1.12003	1.22923	1.34446	0.760984	1.10797	0.977636	0.992806	1.07124	1.23834	1.19554	1.13243	0.864986	0.987232	1.06563	0.611303	1.21687	1.09782	1.06513	1.01918	1.26492	1.13565	0.617686	1.01445	0.815715	1.22553	1.12381	1.21572	1.10421	1.43039	1.2709	1.12386	1.16335	1.07889	0.971655	1.18367	1.11645	1.16553	1.09582	0.790445	1.25138	1.05633
0.98723	1.01107	0.953727	0.622071	1.03272	1.07947	1.41512	1.06527	1.30399	1.09492	1.20807	1.34278	0.743857	1.07844	0.957573	0.972535	1.04785	1.22314	1.17672	1.10919	0.84985	0.96095	1.05619	0.56605	1.19769	1.08092	1.04135	0.989725	1.24375	1.11736	0.586016	0.989503	0.786985	1.1848	1.10395	1.19837	1.07307	1.40163	1.24934	1.09823	1.14368	1.0538	0.944461	1.17217	1.10194	1.14464	1.07912	0.774437	1.23089	1.04541
0.970184	0.981925	0.923325	0.578358	0.991675	1.05278	1.39273	1.044	1.28471	1.0685	1.18548	1.33723	0.729105	1.04938	0.936338	0.95286	1.02215	1.20829	1.15867	1.08458	0.832999	0.93599	1.04724	0.520237	1.17786	1.06469	1.01542	0.961318	1.22033	1.09812	0.556613	0.963129	0.753791	1.14384	1.08484	1.18007	1.04137	1.36937	1.22547	1.0737	1.12313	1.02948	0.917806	1.15912	1.08962	1.12483	1.06363	0.756699	1.20833	1.03283
0.953059	0.953086	0.892612	0.536216	0.949343	1.02588	1.37087	1.02125	1.26259	1.04089	1.16241	1.32794	0.716147	1.02001	0.914115	0.934216	0.993844	1.19414	1.14104	1.05943	0.813415	0.910823	1.03897	0.474754	1.15805	1.04816	0.987942	0.933742	1.19627	1.07792	0.528966	0.934749	0.717997	1.1023	1.06658	1.16103	1.00946	1.33525	1.19889	1.0501	1.10232	1.00407	0.894255	1.14461	1.07885	1.10504	1.04922	0.737203	1.18444	1.01688
0.935487	0.92326	0.861749	0.495941	0.906589	0.999207	1.34952	0.997062	1.2379	1.01237	1.14001	1.31565	0.704582	0.989967	0.891248	0.916863	0.963178	1.18092	1.12292	1.03483	0.791025	0.884171	1.03095	0.430513	1.13861	1.03051	0.959795	0.906574	1.17332	1.05689	0.500999	0.904106	0.682508	1.05987	1.04886	1.14146	0.97751	1.30211	1.1699	1.02706	1.082	0.975977	0.873883	1.12919	1.06865	1.08446	1.03477	0.716276	1.15991	0.996793
0.917466	0.891367	0.830709	0.457799	0.86355	0.973594	1.32857	0.971648	1.21111	0.983038	1.11802	1.30121	0.694537	0.958691	0.868157	0.900456	0.930777	1.16823	1.1037	1.01106	0.766528	0.855729	1.0223	0.38829	1.11941	1.01183	0.931677	0.879126	1.15216	1.03524	0.470585	0.871369	0.650831	1.01624	1.03078	1.12159	0.945717	1.27089	1.13925	1.00414	1.06209	0.94464	0.855144	1.11357	1.058	1.06266	1.01919	0.694775	1.13548	0.972909
0.899056	0.857537	0.799391	0.421847	0.819986	0.949486	1.30732	0.945356	1.18272	0.952377	1.09544	1.28539	0.685754	0.925546	0.845356	0.883609	0.897321	1.15476	1.08304	0.987943	0.741014	0.82578	1.01226	0.348566	1.10042	0.992673	0.9039	0.850059	1.13186	1.01338	0.437259	0.837219	0.624129	0.971011	1.01168	1.1019	0.913883	1.24141	1.10777	0.980849	1.04201	0.910244	0.836109	1.09821	1.04573	1.03944	1.002	0.674519	1.11185	0.94641
0.880609	0.82267	0.767324	0.387847	0.775699	0.926995	1.28401	0.918441	1.15379	0.920057	1.07129	1.2691	0.678288	0.890238	0.823323	0.864865	0.863324	1.13943	1.06087	0.965174	0.715318	0.794905	1.00057	0.310972	1.08137	0.973716	0.876887	0.818617	1.11187	0.991943	0.401608	0.802862	0.601729	0.925132	0.991396	1.08213	0.880914	1.21312	1.07632	0.957206	1.02116	0.873466	0.815267	1.08306	1.03119	1.0149	0.983138	0.65697	1.08899	0.918775
0.863055	0.787848	0.733885	0.35547	0.730405	0.905985	1.25771	0.890988	1.12487	0.885898	1.045	1.25211	0.672278	0.852938	0.802249	0.843236	0.829396	1.1215	1.03732	0.942284	0.689818	0.763763	0.987689	0.273746	1.06178	0.955398	0.850596	0.785181	1.09131	0.971597	0.364704	0.769002	0.581917	0.879451	0.970093	1.06155	0.84582	1.18484	1.046	0.932918	0.999163	0.835221	0.79162	1.06812	1.0145	0.989407	0.962867	0.642549	1.06564	0.891869
0.846806	0.753764	0.698677	0.324498	0.683409	0.88599	1.22766	0.863068	1.0962	0.849916	1.01661	1.23367	0.667623	0.81431	0.78209	0.818144	0.795914	1.10052	1.01273	0.918523	0.665066	0.733181	0.974369	0.235386	1.04123	0.937824	0.824593	0.750859	1.06901	0.952794	0.3277	0.736062	0.562549	0.834696	0.948117	1.03956	0.808203	1.15375	1.01732	0.907549	0.97584	0.7967	0.764818	1.0532	0.996415	0.963769	0.941724	0.630909	1.04067	0.867335
0.831812	0.72027	0.661762	0.294476	0.634672	0.866162	1.19342	0.834817	1.068	0.812402	0.987064	1.2132	0.664223	0.775461	0.762652	0.789585	0.763074	1.07655	0.987716	0.893617	0.640588	0.704073	0.961247	0.195568	1.01965	0.920897	0.798373	0.716906	1.04411	0.935397	0.291773	0.70426	0.54082	0.791427	0.925836	1.01589	0.768118	1.11752	0.990292	0.880825	0.951464	0.759151	0.735577	1.03797	0.977941	0.939057	0.920654	0.621221	1.01292	0.845194
0.81774	0.686692	0.62382	0.265159	0.5849	0.845855	1.15518	0.80629	1.03994	0.773695	0.957081	1.19045	0.662327	0.737137	0.743667	0.758305	0.730947	1.05019	0.963088	0.867635	0.615247	0.6765	0.948946	0.154563	0.997357	0.904305	0.771596	0.68394	1.01662	0.918362	0.257995	0.67318	0.514018	0.749325	0.903598	0.99078	0.725966	1.07605	0.96459	0.852734	0.92649	0.722794	0.7055	1.02216	0.959681	0.915658	0.900767	0.612581	0.981379	0.822625
0.804137	0.652859	0.585909	0.236341	0.535246	0.824586	1.11356	0.777305	1.01073	0.733978	0.927336	1.16542	0.661417	0.69986	0.724862	0.726169	0.699299	1.0228	0.938919	0.840883	0.588019	0.6499	0.937898	0.112822	0.974927	0.887556	0.744183	0.651382	0.987754	0.90063	0.226859	0.641207	0.481779	0.706569	0.881778	0.964966	0.682347	1.03077	0.939589	0.823577	0.901544	0.687214	0.676316	1.00571	0.941532	0.893466	0.882542	0.604034	0.945693	0.796979
0.790765	0.618831	0.54875	0.207741	0.48682	0.80199	1.06955	0.748078	0.979766	0.693892	0.898436	1.13934	0.660583	0.66388	0.706199	0.69544	0.667287	0.99634	0.914861	0.813792	0.558483	0.623518	0.927923	0.0709354	0.952835	0.870202	0.716375	0.618471	0.95913	0.881752	0.198257	0.606968	0.445598	0.661642	0.860399	0.938871	0.637954	0.983724	0.914207	0.793711	0.877228	0.651867	0.64872	0.988806	0.923378	0.872108	0.865979	0.594351	0.906438	0.767088
0.778058	0.584728	0.51286	0.179338	0.439865	0.77791	1.02465	0.719025	0.947338	0.654146	0.870213	1.11355	0.658788	0.628786	0.687684	0.667007	0.634362	0.97144	0.89053	0.786592	0.527029	0.596748	0.917901	0.0296993	0.931505	0.852158	0.68858	0.584779	0.931928	0.861637	0.171599	0.570192	0.407855	0.613619	0.839241	0.912805	0.593637	0.936441	0.887639	0.763023	0.853607	0.616168	0.621679	0.971884	0.904711	0.850998	0.850752	0.583416	0.865233	0.732715
0.766766	0.550797	0.478506	0.151581	0.392954	0.752584	0.979494	0.690625	0.914183	0.615424	0.840954	1.08936	0.655221	0.593079	0.669311	0.640904	0.600887	0.947931	0.865577	0.758994	0.494686	0.569331	0.906841	-0.0105948	0.911205	0.833889	0.661317	0.55002	0.907038	0.840464	0.14611	0.53133	0.370566	0.562011	0.818035	0.887037	0.549921	0.889232	0.859845	0.73126	0.829709	0.579034	0.594105	0.955432	0.884775	0.829297	0.836253	0.571852	0.824022	0.694464
0.756933	0.51722	0.445315	0.124074	0.344448	0.726866	0.934306	0.663249	0.881146	0.578225	0.80901	1.06779	0.649973	0.555503	0.651058	0.616732	0.567698	0.92535	0.839707	0.730523	0.462481	0.541376	0.894032	-0.0501713	0.891761	0.815896	0.635009	0.514106	0.884851	0.818705	0.120806	0.4912	0.334739	0.506906	0.796563	0.861404	0.50713	0.842043	0.831272	0.698315	0.804467	0.539479	0.564789	0.939956	0.863026	0.80644	0.821506	0.560429	0.784356	0.653653
0.74812	0.483757	0.411766	0.0964379	0.293947	0.701475	0.889248	0.636821	0.848596	0.542358	0.773762	1.04849	0.644787	0.515555	0.632888	0.593491	0.535593	0.902826	0.813201	0.700999	0.431507	0.513008	0.87899	-0.089554	0.87229	0.798696	0.609652	0.477306	0.864742	0.797289	0.0945571	0.4506	0.30111	0.449061	0.774747	0.834867	0.46545	0.794957	0.802531	0.664185	0.777498	0.498293	0.532435	0.925776	0.839437	0.782114	0.805695	0.549818	0.747521	0.612481
0.739734	0.451367	0.376344	0.0684014	0.24175	0.676337	0.843931	0.61037	0.815889	0.506335	0.735299	1.02864	0.641587	0.473273	0.614737	0.569176	0.504875	0.878794	0.786265	0.670461	0.402598	0.484425	0.861663	-0.12928	0.851944	0.782793	0.584551	0.440153	0.844653	0.777177	0.067347	0.410145	0.269951	0.390352	0.752827	0.806587	0.424625	0.748046	0.774106	0.628878	0.748858	0.457334	0.496299	0.912748	0.814542	0.75627	0.788548	0.540638	0.714218	0.573759
0.731248	0.421572	0.33861	0.039769	0.188467	0.651003	0.796797	0.582709	0.78219	0.468733	0.694241	1.0053	0.640934	0.429157	0.596317	0.542397	0.474889	0.852433	0.759086	0.639106	0.375542	0.455866	0.842535	-0.1695	0.830266	0.768446	0.558928	0.403069	0.822742	0.758749	0.0398607	0.370481	0.240803	0.333456	0.730984	0.776258	0.383553	0.701388	0.746334	0.59284	0.718899	0.418385	0.456732	0.900061	0.789169	0.729149	0.770185	0.532891	0.683769	0.539084
0.72226	0.395454	0.298823	0.0107556	0.134879	0.625038	0.747358	0.553637	0.747289	0.429418	0.65151	0.977461	0.642547	0.383935	0.577307	0.512922	0.444394	0.823599	0.731871	0.607233	0.348452	0.427391	0.822779	-0.209394	0.80707	0.755459	0.532194	0.367148	0.797801	0.741931	0.0128994	0.331895	0.212702	0.279037	0.709365	0.743968	0.341494	0.65501	0.719491	0.556505	0.688174	0.382154	0.415471	0.886862	0.764428	0.701147	0.750966	0.526043	0.653024	0.509037
0.712082	0.373138	0.257619	-0.017561	0.0819767	0.598188	0.69611	0.523533	0.711341	0.388977	0.608287	0.945382	0.645683	0.338561	0.557433	0.481275	0.413054	0.792653	0.704574	0.575244	0.319593	0.398749	0.803808	-0.247403	0.782455	0.743023	0.503903	0.333769	0.769123	0.726323	-0.012894	0.294347	0.184843	0.226524	0.688078	0.71013	0.298752	0.608376	0.6932	0.520324	0.657366	0.347571	0.374702	0.872606	0.741573	0.672873	0.73136	0.519204	0.618747	0.483291
0.70017	0.353301	0.215803	-0.0440816	0.0307986	0.57047	0.644099	0.492949	0.67468	0.348201	0.566047	0.910043	0.649356	0.294295	0.536557	0.44835	0.381029	0.760305	0.676523	0.543819	0.287917	0.369613	0.786347	-0.283127	0.75684	0.730164	0.473887	0.303845	0.736746	0.711349	-0.0368997	0.257604	0.156397	0.174981	0.667045	0.675272	0.256141	0.561022	0.666648	0.484715	0.627164	0.312898	0.336296	0.856947	0.721487	0.645152	0.712046	0.511509	0.580403	0.460389
0.686251	0.333665	0.174384	-0.0685438	-0.0178853	0.542363	0.592496	0.462465	0.637744	0.30779	0.525718	0.872941	0.652408	0.251668	0.514831	0.414952	0.348613	0.727151	0.646928	0.513529	0.252837	0.339475	0.770654	-0.316955	0.731102	0.716274	0.442471	0.277259	0.701585	0.696244	-0.0588193	0.221283	0.125811	0.123164	0.645865	0.6399	0.214445	0.514563	0.639053	0.449615	0.598288	0.277297	0.301855	0.839819	0.703971	0.618019	0.693706	0.502734	0.539087	0.437256
0.670352	0.313524	0.13436	-0.0912483	-0.0636771	0.514221	0.541713	0.43268	0.601195	0.268219	0.487778	0.836453	0.653809	0.210639	0.492908	0.381569	0.316331	0.693326	0.615508	0.484788	0.214392	0.307785	0.756601	-0.349583	0.706273	0.700988	0.410732	0.252334	0.665825	0.680253	-0.0792684	0.184734	0.094117	0.0694977	0.62414	0.604722	0.173986	0.471574	0.610126	0.413919	0.571366	0.240385	0.272191	0.821585	0.687105	0.591017	0.676211	0.493521	0.496506	0.411169
0.652903	0.29297	0.0961008	-0.112762	-0.106671	0.48635	0.490457	0.403979	0.566114	0.22964	0.45228	0.803486	0.652709	0.170814	0.471617	0.348408	0.285124	0.658931	0.582382	0.457751	0.173397	0.274248	0.743526	-0.381906	0.682753	0.684238	0.379882	0.226874	0.632077	0.663111	-0.0995238	0.147526	0.0639921	0.0137372	0.601543	0.570258	0.134083	0.434015	0.580377	0.37654	0.546674	0.202118	0.246467	0.803272	0.668841	0.563614	0.658915	0.484235	0.454361	0.381153
0.634922	0.27229	0.0594769	-0.133709	-0.1475	0.459005	0.437103	0.376593	0.53309	0.192162	0.418552	0.775002	0.648592	0.131479	0.451258	0.315189	0.255769	0.623831	0.547942	0.432085	0.131844	0.239031	0.7299	-0.415266	0.660512	0.666428	0.350502	0.200083	0.601281	0.644925	-0.120886	0.109925	0.0380188	-0.0444054	0.577828	0.536852	0.0932234	0.402153	0.550603	0.337448	0.523885	0.163113	0.221274	0.785982	0.648301	0.535371	0.641107	0.475779	0.414344	0.347405
0.61748	0.252308	0.0240574	-0.154807	-0.187536	0.432052	0.381491	0.350556	0.502249	0.155747	0.384744	0.750536	0.641515	0.0913786	0.4318	0.281348	0.228839	0.587778	0.512696	0.406709	0.0922485	0.202889	0.714343	-0.451364	0.639257	0.648619	0.322762	0.171919	0.573256	0.626026	-0.143827	0.0725777	0.0174101	-0.10512	0.552929	0.504648	0.0511242	0.373867	0.521327	0.297248	0.501694	0.124862	0.193077	0.770142	0.625303	0.505888	0.622354	0.469377	0.377968	0.310876
0.600876	0.234863	-0.0107418	-0.176987	-0.228336	0.404438	0.324306	0.325699	0.473353	0.120197	0.349359	0.728916	0.632127	0.0494323	0.41306	0.246409	0.204618	0.550651	0.477181	0.380578	0.0555503	0.166789	0.696483	-0.490984	0.618459	0.631708	0.296521	0.1427	0.547197	0.606863	-0.167585	0.036105	0.00179997	-0.1682	0.52705	0.473347	0.00823558	0.346097	0.492957	0.256716	0.478617	0.0886141	0.160454	0.755728	0.600166	0.47508	0.602584	0.465869	0.34567	0.273003
0.584985	0.22097	-0.0457492	-0.200534	-0.270332	0.374832	0.266475	0.301758	0.445772	0.0853233	0.312233	0.708542	0.621863	0.00551794	0.394662	0.210255	0.182952	0.512469	0.442075	0.353313	0.0216459	0.131424	0.676649	-0.5341	0.597221	0.616226	0.271219	0.113308	0.521767	0.588121	-0.191657	0.000761951	-0.00925132	-0.233358	0.500798	0.441835	-0.034831	0.317188	0.465723	0.216458	0.454398	0.055769	0.12332	0.742423	0.573803	0.443219	0.581916	0.465206	0.316875	0.236059
0.569563	0.211158	-0.081697	-0.225264	-0.313311	0.343017	0.208855	0.278458	0.418292	0.051031	0.273954	0.687558	0.612359	-0.0398123	0.375877	0.173375	0.163316	0.473309	0.407979	0.324915	-0.0101311	0.0973397	0.655567	-0.580147	0.5748	0.602427	0.245622	0.0856286	0.494756	0.570502	-0.215368	-0.0337071	-0.0169468	-0.300579	0.474969	0.409129	-0.0773469	0.286177	0.439377	0.176653	0.42947	0.0275386	0.0825115	0.729666	0.548074	0.410879	0.560733	0.466178	0.290385	0.20228
0.554196	0.205397	-0.118506	-0.250811	-0.356844	0.309515	0.152105	0.255605	0.389632	0.0172015	0.235328	0.665283	0.604059	-0.0857193	0.35607	0.137015	0.144774	0.433791	0.375357	0.295584	-0.0410247	0.0648316	0.634047	-0.628119	0.551018	0.590213	0.218573	0.0611379	0.46426	0.553914	-0.237831	-0.0678077	-0.0235007	-0.369828	0.449863	0.375263	-0.118279	0.252658	0.412855	0.137308	0.404444	0.0042631	0.0397343	0.716521	0.524912	0.378717	0.539664	0.467238	0.265029	0.171678
0.538176	0.202956	-0.155598	-0.276688	-0.400257	0.275117	0.0969405	0.233244	0.359295	-0.0158965	0.197081	0.641217	0.596682	-0.131495	0.335074	0.102108	0.126068	0.394787	0.344425	0.265769	-0.0730955	0.0335704	0.612994	-0.676496	0.526103	0.579135	0.189744	0.0404292	0.429864	0.537739	-0.258406	-0.102092	-0.0312861	-0.44146	0.425479	0.340851	-0.15667	0.21763	0.384994	0.0986619	0.379995	-0.0148171	-0.00190144	0.702101	0.505052	0.346985	0.519301	0.467301	0.240222	0.142786
0.521299	0.202974	-0.192327	-0.302418	-0.442413	0.240582	0.0441953	0.211479	0.327301	-0.0478525	0.159837	0.615033	0.589685	-0.176702	0.313045	0.0693077	0.106713	0.357254	0.314883	0.236335	-0.107777	0.00207116	0.59338	-0.723924	0.500502	0.568225	0.159357	0.0233266	0.392283	0.521256	-0.277122	-0.137172	-0.0410329	-0.515839	0.401683	0.306615	-0.191875	0.184584	0.355184	0.060984	0.357022	-0.0316764	-0.0391727	0.686158	0.488329	0.315094	0.499775	0.465546	0.215967	0.113752
0.503782	0.20479	-0.228263	-0.328244	-0.4828	0.206417	-0.00547137	0.190332	0.293957	-0.0784292	0.12386	0.586768	0.582314	-0.220974	0.290304	0.0389024	0.0866618	0.321897	0.2855	0.207948	-0.145629	-0.0312035	0.575363	-0.769916	0.47467	0.556371	0.127927	0.0089843	0.35286	0.503996	-0.295013	-0.173498	-0.0507616	-0.592929	0.378132	0.27307	-0.223698	0.156745	0.323218	0.0244029	0.336081	-0.0487069	-0.0711053	0.668914	0.473967	0.282361	0.480437	0.461579	0.192161	0.0831859
0.486069	0.20694	-0.263325	-0.35417	-0.521595	0.172903	-0.0518646	0.169783	0.259874	-0.107645	0.088755	0.556771	0.573218	-0.264413	0.267212	0.010351	0.0660244	0.288544	0.254996	0.180611	-0.186525	-0.0665335	0.558479	-0.8145	0.449057	0.5433	0.0960814	-0.00361618	0.312884	0.48582	-0.313506	-0.210976	-0.059556	-0.672448	0.354114	0.24033	-0.252485	0.135377	0.289276	-0.0111325	0.317117	-0.0674025	-0.0983755	0.65085	0.460846	0.248599	0.460588	0.45592	0.168637	0.0504092
0.468624	0.208768	-0.297861	-0.380009	-0.559434	0.140575	-0.0954454	0.149727	0.226133	-0.135855	0.0536849	0.525871	0.561238	-0.307502	0.244045	-0.0182359	0.0452783	0.255502	0.223317	0.153916	-0.229785	-0.10343	0.542025	-0.85793	0.424085	0.529289	0.0645518	-0.0155344	0.273455	0.46664	-0.333443	-0.248629	-0.066933	-0.75398	0.329125	0.208157	-0.278942	0.120244	0.253962	-0.0459356	0.299568	-0.0886787	-0.122581	0.632506	0.44748	0.2139	0.439762	0.450465	0.145226	0.015274
0.45158	0.210158	-0.332318	-0.405572	-0.597116	0.109989	-0.137394	0.129457	0.193495	-0.164	0.0178107	0.494732	0.546653	-0.350813	0.220829	-0.0488547	0.0256577	0.220939	0.191083	0.127347	-0.27452	-0.14111	0.525357	-0.900756	0.399675	0.514856	0.0338776	-0.0283558	0.235872	0.446727	-0.355285	-0.285418	-0.0724276	-0.836038	0.303075	0.176417	-0.304188	0.109908	0.218418	-0.0803692	0.282636	-0.112809	-0.145636	0.614476	0.432454	0.178509	0.41764	0.446888	0.121884	-0.021564
0.434323	0.211183	-0.367232	-0.43066	-0.635065	0.0814279	-0.178721	0.108566	0.161972	-0.192641	-0.0191636	0.462386	0.53075	-0.394684	0.197597	-0.082531	0.0078825	0.184254	0.159023	0.100535	-0.319981	-0.178774	0.507997	-0.944248	0.375412	0.500602	0.00412336	-0.0426098	0.200172	0.426664	-0.379087	-0.320749	-0.0759341	-0.917366	0.276158	0.144957	-0.329856	0.102424	0.183833	-0.114244	0.265801	-0.138874	-0.169746	0.59731	0.415269	0.142765	0.394143	0.446076	0.0988161	-0.0587533
0.415854	0.212445	-0.403041	-0.455182	-0.673053	0.0547324	-0.219918	0.0868844	0.131128	-0.222104	-0.0566391	0.427137	0.515086	-0.439241	0.174398	-0.119614	-0.00824824	0.145554	0.127738	0.0734045	-0.365891	-0.215679	0.489779	-0.989377	0.350833	0.487299	-0.0249815	-0.0580683	0.165453	0.407057	-0.40424	-0.354329	-0.0776249	-0.996905	0.248707	0.113593	-0.356512	0.0954966	0.150833	-0.147165	0.249143	-0.16399	-0.196797	0.581029	0.396106	0.10704	0.369564	0.448338	0.0755448	-0.0948756
0.395822	0.215688	-0.439711	-0.479216	-0.710937	0.0290906	-0.261328	0.0643863	0.100413	-0.25254	-0.0937634	0.387717	0.500587	-0.484664	0.151281	-0.159863	-0.0234976	0.105309	0.0975764	0.0461008	-0.412129	-0.25133	0.470901	-1.03549	0.325655	0.475581	-0.0538363	-0.0741953	0.130568	0.388141	-0.42929	-0.386196	-0.0771838	-1.07391	0.221024	0.082321	-0.384081	0.0861254	0.119639	-0.178877	0.232661	-0.185636	-0.227201	0.565276	0.375557	0.0717415	0.344727	0.453339	0.0508957	-0.12942
0.374328	0.22191	-0.47659	-0.502058	-0.748244	0.00365726	-0.303238	0.0413922	0.0694213	-0.283609	-0.129806	0.343909	0.486991	-0.530389	0.128268	-0.202311	-0.0387738	0.0643514	0.0683339	0.0188575	-0.45864	-0.285478	0.451846	-1.08104	0.299826	0.465547	-0.0827729	-0.0901527	0.0946327	0.369546	-0.453049	-0.416829	-0.0739138	-1.14887	0.193203	0.051468	-0.412297	0.0727451	0.0901301	-0.20932	0.216473	-0.203097	-0.260249	0.549577	0.354439	0.0374235	0.320632	0.460181	0.0234569	-0.163515
0.35171	0.230824	-0.513242	-0.522707	-0.784298	-0.021511	-0.345469	0.0188198	0.0378478	-0.314079	-0.164124	0.29695	0.473945	-0.575369	0.105249	-0.244783	-0.0545707	0.0241257	0.0398788	-0.00803071	-0.505395	-0.318152	0.433142	-1.1246	0.273468	0.456825	-0.111981	-0.104419	0.0570786	0.350853	-0.474556	-0.447401	-0.0694286	-1.22449	0.165121	0.0212994	-0.440495	0.0550019	0.0617392	-0.238692	0.200805	-0.216902	-0.294691	0.533562	0.333878	0.00463151	0.297889	0.467359	-0.00774987	-0.198689
0.328521	0.241296	-0.54889	-0.540507	-0.818629	-0.0459756	-0.387039	-0.00255208	0.00543066	-0.342897	-0.196391	0.249227	0.461323	-0.618679	0.0821241	-0.284868	-0.070602	-0.0139894	0.0120419	-0.0343285	-0.552442	-0.349634	0.41502	-1.16564	0.246952	0.44878	-0.141415	-0.115916	0.0177662	0.331692	-0.493106	-0.4793	-0.0666903	-1.30309	0.136777	-0.0077727	-0.467179	0.033488	0.033133	-0.267807	0.185801	-0.228376	-0.329299	0.516965	0.314679	-0.026341	0.276803	0.473287	-0.0425032	-0.236014
0.305722	0.251904	-0.582592	-0.555484	-0.851244	-0.0693826	-0.427799	-0.0222997	-0.0273104	-0.369644	-0.22693	0.202279	0.448931	-0.660064	0.0593215	-0.321939	-0.0865086	-0.0495471	-0.0154237	-0.0600617	-0.600157	-0.380294	0.397271	-1.20525	0.220818	0.440895	-0.170744	-0.124887	-0.0226462	0.311702	-0.508574	-0.513074	-0.0682222	-1.38525	0.108256	-0.0353275	-0.491591	0.00984084	0.00301642	-0.297056	0.171493	-0.239019	-0.362788	0.49958	0.296708	-0.0556908	0.257358	0.477117	-0.0788578	-0.276284
0.284648	0.261849	-0.61376	-0.568837	-0.882945	-0.0914919	-0.468182	-0.0402752	-0.0593878	-0.39435	-0.257195	0.157238	0.436523	-0.70042	0.0375136	-0.356512	-0.102007	-0.0827866	-0.0425539	-0.0858255	-0.648686	-0.410509	0.379682	-1.24567	0.195538	0.432882	-0.199478	-0.132485	-0.0629096	0.290682	-0.521573	-0.548692	-0.0747199	-1.47053	0.0796651	-0.061191	-0.513987	-0.0126257	-0.0287298	-0.326587	0.157826	-0.250405	-0.394065	0.481706	0.279212	-0.0843716	0.23908	0.478589	-0.114815	-0.319777
0.265894	0.271474	-0.642523	-0.582749	-0.915228	-0.112135	-0.508871	-0.0566183	-0.089936	-0.417396	-0.289181	0.114847	0.424053	-0.741166	0.0172115	-0.38956	-0.116816	-0.114343	-0.0689323	-0.112659	-0.69704	-0.440557	0.361679	-1.28765	0.171172	0.424242	-0.227217	-0.140125	-0.101796	0.268757	-0.533733	-0.585763	-0.0844282	-1.55798	0.0511024	-0.0855348	-0.535249	-0.0310392	-0.061501	-0.356471	0.14436	-0.264365	-0.423868	0.463987	0.261308	-0.113468	0.220837	0.47799	-0.149081	-0.365864
0.249465	0.280838	-0.670141	-0.597727	-0.948805	-0.131847	-0.550509	-0.0717467	-0.118714	-0.439372	-0.323739	0.0743828	0.411509	-0.782804	-0.00152907	-0.422297	-0.130775	-0.145006	-0.0942159	-0.140932	-0.743625	-0.470303	0.342469	-1.33113	0.147126	0.415006	-0.253929	-0.148647	-0.138908	0.246437	-0.546948	-0.62357	-0.0957918	-1.64644	0.0226148	-0.109046	-0.556426	-0.0448562	-0.0944826	-0.386425	0.130472	-0.281468	-0.454106	0.447048	0.242455	-0.143271	0.201574	0.476154	-0.180685	-0.412643
0.234985	0.290135	-0.698408	-0.613341	-0.983896	-0.15109	-0.593164	-0.0865004	-0.146513	-0.461097	-0.360937	0.0322517	0.398399	-0.825356	-0.0194358	-0.45627	-0.143994	-0.175608	-0.117994	-0.170546	-0.787074	-0.499427	0.321458	-1.3757	0.122738	0.405612	-0.280187	-0.158092	-0.175055	0.224222	-0.561869	-0.660973	-0.107788	-1.73457	-0.00562948	-0.132912	-0.578071	-0.0551255	-0.126975	-0.415539	0.115482	-0.301212	-0.486664	0.431124	0.222677	-0.17365	0.180817	0.474781	-0.20911	-0.457895
[truncated: 82 more columns]

## Sheet: yMeanHiRewardHiSD
0.114572
0.0892571
0.0638336
0.0382015
0.0122884
-0.0139291
-0.0404249
-0.0670907
-0.0937649
-0.120332
-0.146737
-0.172941
-0.198973
-0.224909
-0.250808
-0.276742
-0.302803
-0.328989
-0.355275
-0.381692
-0.408274
-0.43499
-0.461808
-0.488715
-0.515663
-0.54261
-0.569529
-0.596367
-0.623092
-0.649678
-0.676134
-0.702537
-0.728984
-0.755501
-0.782101
-0.808831
-0.83564
-0.862379
-0.888916
-0.91515
-0.941029
-0.966596
-0.991886
-1.01681
-1.04129
-1.06532
-1.08894
-1.11216
-1.13498
-1.15735
-1.1792
-1.20055
-1.22139
-1.24169
-1.26138
-1.28029
-1.2983
-1.31538
-1.33149
-1.34648
-1.36037
-1.37312
-1.38477
-1.39539
-1.40502
-1.41357
-1.421
-1.42722
-1.43221
-1.43595
-1.4384
-1.43951
-1.43943
-1.43815
-1.43563
-1.43179
-1.42655
-1.41985
-1.41187
-1.40269
-1.39233
-1.38074
-1.36793
-1.35396
-1.33896
-1.32291
-1.3057
-1.28724
-1.26747
-1.24635
-1.22401
-1.20047
-1.17574
-1.14985
-1.12286
-1.09468
-1.06528
-1.03461
-1.00269
-0.969594
-0.935402
-0.900104
-0.863708
-0.8262
-0.787648
-0.748164
-0.707783
-0.66643
-0.624098
-0.580833
-0.536697
-0.491797
-0.446235
-0.400048
-0.353285
-0.306028
-0.258354
-0.210319
-0.161963
-0.113372
-0.0646905
-0.016036
0.0325777
0.0811559
0.129667
0.178038
0.22616
0.27387
0.321095
0.367807
0.413976
0.459567
0.504589
0.548966
0.592623
0.635513
0.677579
0.718754
0.759028
0.798324
0.836596
0.873826
0.91
0.94514
0.979342
1.01252
1.04451
1.07522
1.10466
1.1328
1.15977
1.18553
1.21005
1.23332
1.25533
1.27601
1.29533
1.31319
1.32949
1.34425
1.35757
1.36947
1.38007
1.38941
1.39752
1.40444
1.41013
1.41441
1.41726
1.41868
1.41878
1.41763
1.41531
1.41176
1.40705
1.40123
1.39432
1.38639
1.3775
1.36766
1.35706
1.34583
1.33401
1.32155
1.3084
1.29452
1.27991
1.26454
1.24841
1.23156
1.21409
1.19608
1.1777
1.15901
1.14
1.12059
1.10073
1.08041
1.05959
1.03827
1.01649
0.994304
0.971734
0.94872
0.925203
0.901154
0.876598
0.85161
0.826266
0.800625
0.77477
0.748769
0.722653
0.696398
0.669979
0.643368
0.61652
0.589423
0.562163
0.534833
0.507493
0.480201
0.453012
0.425946
0.398972
0.372027
0.345122
0.318352
0.291793
0.265472
0.239406
0.213532
0.18774
0.161941
0.136068
0.110094
0.0840591
0.058032
0.0320888
0.0063132
-0.0192285
-0.0445329
-0.069659
-0.0946902
-0.119701
-0.144738

## Sheet: TmpltSdNorm
-0.154235
-0.175932
-0.197407
-0.218673
-0.239727
-0.26056
-0.281233
-0.301825
-0.322333
-0.342733
-0.363051
-0.383313
-0.403499
-0.423583
-0.443533
-0.46329
-0.482889
-0.502382
-0.52181
-0.541229
-0.560673
-0.580159
-0.599692
-0.619239
-0.638736
-0.658166
-0.677521
-0.696747
-0.715842
-0.73482
-0.753647
-0.772329
-0.790943
-0.809556
-0.828209
-0.846976
-0.86596
-0.885232
-0.904835
-0.924759
-0.94498
-0.965507
-0.986334
-1.00746
-1.02891
-1.05071
-1.07289
-1.09545
-1.11843
-1.14178
-1.16545
-1.18937
-1.21342
-1.23753
-1.26169
-1.28584
-1.30981
-1.33339
-1.35635
-1.37846
-1.39955
-1.41945
-1.43796
-1.45492
-1.47021
-1.48375
-1.49558
-1.50569
-1.51393
-1.52016
-1.52427
-1.5261
-1.52564
-1.52299
-1.51817
-1.51131
-1.50244
-1.49151
-1.47849
-1.46345
-1.44642
-1.42756
-1.40704
-1.38497
-1.36155
-1.33705
-1.3116
-1.28536
-1.25842
-1.23064
-1.20194
-1.17233
-1.14182
-1.1105
-1.07851
-1.0459
-1.01271
-0.979039
-0.944869
-0.910171
-0.874956
-0.839181
-0.802816
-0.765895
-0.728392
-0.69029
-0.65162
-0.612367
-0.572435
-0.531762
-0.490251
-0.447813
-0.404448
-0.3602
-0.315081
-0.269168
-0.222636
-0.175642
-0.128327
-0.0807781
-0.0329422
0.0152207
0.0636668
0.112349
0.161211
0.21017
0.259174
0.308085
0.356604
0.404505
0.451638
0.497897
0.543271
0.587821
0.631531
0.674395
0.716359
0.757287
0.797102
0.835794
0.873281
0.909582
0.944766
0.978874
1.01193
1.04397
1.07492
1.10473
1.13338
1.16077
1.18684
1.21168
1.23535
1.25798
1.27973
1.30066
1.32078
1.34003
1.35822
1.37524
1.39105
1.40558
1.41873
1.43056
1.44108
1.45032
1.45827
1.46485
1.47002
1.47386
1.47635
1.47749
1.47731
1.47583
1.47309
1.46916
1.46402
1.4576
1.44979
1.44053
1.42988
1.41802
1.40512
1.39133
1.37677
1.3615
1.34558
1.32905
1.31189
1.29416
1.27591
1.25718
1.23793
1.21817
1.19794
1.17734
1.15639
1.13509
1.1134
1.09132
1.06888
1.0461
1.02305
0.999798
0.976345
0.95271
0.928855
0.904719
0.880222
0.855342
0.830071
0.804444
0.778494
0.752225
0.725654
0.698861
0.67194
0.644974
0.617981
0.590926
0.563759
0.536454
0.508976
0.481349
0.453672
0.426039
0.398491
0.371073
0.343839
0.31681
0.29001
0.263448
0.237122
0.211006
0.185104
0.159465
0.134207
0.109413
0.0850941
0.0611994
0.0376287
0.0142552
-0.00899078
-0.0321394
-0.055142
-0.0779183
