# Supplementary material for: Task-related hemodynamic responses are modulated by reward and task engagement
Source: PLoS Biol. 2019 Apr 19;17(4):e3000080. doi: 10.1371/journal.pbio.3000080 (PMC6493772; doi:10.1371/journal.pbio.3000080)
Supplement: S27 Data — (XLSX) [file pbio.3000080.s035.xlsx]

## Sheet: AC_Timebase
0.0666648
0.13333
0.199994
0.266659
0.333324
0.399989
0.466654
0.533318
0.599983
0.666648
0.733313
0.799978
0.866643
0.933307
0.999972
1.06664
1.1333
1.19997
1.26663
1.3333
1.39996
1.46663
1.53329
1.59996
1.66662
1.73329
1.79995
1.86661
1.93328
1.99994
2.06661
2.13327
2.19994
2.2666
2.33327
2.39993
2.4666
2.53326
2.59993
2.66659
2.73326
2.79992
2.86659
2.93325
2.99992
3.06658
3.13325
3.19991
3.26658
3.33324
3.39991
3.46657
3.53324
3.5999
3.66656
3.73323
3.79989
3.86656
3.93322
3.99989
4.06655
4.13322
4.19988
4.26655
4.33321
4.39988
4.46654
4.53321
4.59987
4.66654
4.7332
4.79987
4.86653
4.9332
4.99986
5.06653
5.13319
5.19986
5.26652
5.33318
5.39985
5.46651
5.53318
5.59984
5.66651
5.73317
5.79984
5.8665
5.93317
5.99983
6.0665
6.13316
6.19983
6.26649
6.33316
6.39982
6.46649
6.53315
6.59982
6.66648
6.73315
6.79981
6.86648
6.93314
6.99981
7.06647
7.13313
7.1998
7.26646
7.33313
7.39979
7.46646
7.53312
7.59979
7.66645
7.73312
7.79978
7.86645
7.93311
7.99978
8.06644
8.13311
8.19977
8.26644
8.3331
8.39977
8.46643
8.5331
8.59976
8.66643
8.73309
8.79976
8.86642
8.93308
8.99975
9.06641
9.13308
9.19974
9.26641
9.33307
9.39974
9.4664
9.53307
9.59973
9.6664
9.73306
9.79973
9.86639
9.93306
9.99972
10.0664
10.1331
10.1997
10.2664
10.333
10.3997
10.4664
10.533
10.5997
10.6664
10.733
10.7997
10.8664
10.933
10.9997
11.0664
11.133
11.1997
11.2664
11.333
11.3997
11.4663
11.533
11.5997
11.6663
11.733
11.7997
11.8663
11.933
11.9997
12.0663
12.133
12.1997
12.2663
12.333
12.3997
12.4663
12.533
12.5996
12.6663
12.733
12.7996
12.8663
12.933
12.9996
13.0663
13.133
13.1996
13.2663
13.333
13.3996
13.4663
13.533
13.5996
13.6663
13.733
13.7996
13.8663
13.9329
13.9996
14.0663
14.1329
14.1996
14.2663
14.3329
14.3996
14.4663
14.5329
14.5996
14.6663
14.7329
14.7996
14.8663
14.9329
14.9996
15.0662
15.1329
15.1996
15.2662
15.3329
15.3996
15.4662
15.5329
15.5996
15.6662
15.7329
15.7996
15.8662
15.9329
15.9996
16.0662
16.1329
16.1995
16.2662
16.3329
16.3995
16.4662
16.5329
16.5995
16.6662
16.7329
16.7995
16.8662
16.9329
16.9995
17.0662
17.1329
17.1995
17.2662
17.3329
17.3995
17.4662
17.5328
17.5995
17.6662
17.7328
17.7995
17.8662
17.9328
17.9995
18.0662
18.1328
18.1995
18.2662
18.3328
18.3995
18.4662
18.5328
18.5995
18.6661
18.7328
18.7995
18.8661
18.9328
18.9995
19.0661
19.1328
19.1995
19.2661
19.3328
19.3995
19.4661
19.5328
19.5995
19.6661
19.7328
19.7994
19.8661
19.9328
19.9994
20.0661
20.1328
20.1994
20.2661
20.3328
20.3994
20.4661
20.5328
20.5994
20.6661
20.7328
20.7994
20.8661
20.9328
20.9994
21.0661
21.1327
21.1994
21.2661
21.3327
21.3994
21.4661
21.5327
21.5994
21.6661
21.7327
21.7994
21.8661
21.9327
21.9994
22.0661
22.1327
22.1994
22.266
22.3327
22.3994
22.466
22.5327
22.5994
22.666
22.7327
22.7994
22.866
22.9327
22.9994
23.066
23.1327
23.1994
23.266
23.3327
23.3993
23.466
23.5327
23.5993
23.666
23.7327
23.7993
23.866
23.9327
23.9993
24.066
24.1327
24.1993
24.266
24.3327
24.3993
24.466
24.5327
24.5993
24.666
24.7326
24.7993
24.866
24.9326
24.9993
25.066
25.1326
25.1993
25.266
25.3326
25.3993
25.466
25.5326
25.5993
25.666
25.7326
25.7993
25.8659
25.9326
25.9993
26.0659
26.1326
26.1993
26.2659
26.3326
26.3993
26.4659
26.5326
26.5993
26.6659
26.7326
26.7993
26.8659
26.9326
26.9992
27.0659
27.1326
27.1992
27.2659
27.3326
27.3992
27.4659
27.5326
27.5992
27.6659
27.7326
27.7992
27.8659
27.9326
27.9992
28.0659
28.1326
28.1992
28.2659
28.3325
28.3992
28.4659
28.5325
28.5992
28.6659
28.7325
28.7992
28.8659
28.9325
28.9992
29.0659
29.1325
29.1992
29.2659
29.3325
29.3992
29.4658
29.5325
29.5992
29.6658
29.7325
29.7992
29.8658
29.9325
29.9992
30.0658
30.1325
30.1992
30.2658
30.3325
30.3992
30.4658
30.5325
30.5991
30.6658
30.7325
30.7991
30.8658
30.9325
30.9991
31.0658
31.1325
31.1991
31.2658
31.3325
31.3991
31.4658
31.5325
31.5991
31.6658
31.7325
31.7991
31.8658
31.9324
31.9991
32.0658
32.1324
32.1991
32.2658
32.3324
32.3991
32.4658
32.5324
32.5991
32.6658
32.7324
32.7991
32.8658
32.9324
32.9991
33.0657
33.1324
33.1991
33.2657
33.3324
33.3991
33.4657
33.5324
33.5991
33.6657
33.7324
33.7991
33.8657
33.9324
33.9991
34.0657
34.1324
34.199
34.2657
34.3324
34.399
34.4657
34.5324
34.599
34.6657
34.7324
34.799
34.8657
34.9324
34.999
35.0657
35.1324
35.199
35.2657
35.3324
35.399
35.4657
35.5323
35.599
35.6657
35.7323
35.799
35.8657
35.9323
35.999
36.0657
36.1323
36.199
36.2657
36.3323
36.399
36.4657
36.5323
36.599
36.6656
36.7323
36.799
36.8656
36.9323
36.999
37.0656
37.1323
37.199
37.2656
37.3323
37.399
37.4656
37.5323
37.599
37.6656
37.7323
37.7989
37.8656
37.9323
37.9989
38.0656
38.1323
38.1989
38.2656
38.3323
38.3989
38.4656
38.5323
38.5989
38.6656
38.7323
38.7989
38.8656
38.9323
38.9989
39.0656
39.1322
39.1989
39.2656
39.3322
39.3989
39.4656
39.5322
39.5989
39.6656
39.7322
39.7989
39.8656
39.9322
39.9989
40.0656
40.1322
40.1989
40.2655
40.3322
40.3989
40.4655
40.5322
40.5989
40.6655
40.7322
40.7989
40.8655
40.9322
40.9989
41.0655
41.1322
41.1989
41.2655
41.3322
41.3988
41.4655
41.5322
41.5988
41.6655
41.7322
41.7988
41.8655
41.9322
41.9988
42.0655
42.1322
42.1988
42.2655
42.3322
42.3988
42.4655
42.5321
42.5988
42.6655
42.7321
42.7988
42.8655
42.9321
42.9988
43.0655
43.1321
43.1988
43.2655
43.3321
43.3988
43.4655
43.5321
43.5988
43.6655
43.7321
43.7988
43.8654
43.9321
43.9988
44.0654
44.1321
44.1988
44.2654
44.3321
44.3988
44.4654
44.5321
44.5988
44.6654
44.7321
44.7988
44.8654
44.9321
44.9987
45.0654
45.1321
45.1987
45.2654
45.3321
45.3987
45.4654
45.5321
45.5987
45.6654
45.7321
45.7987
45.8654
45.9321
45.9987
46.0654
46.132
46.1987
46.2654
46.332
46.3987
46.4654
46.532
46.5987
46.6654
46.732
46.7987
46.8654
46.932
46.9987
47.0654
47.132
47.1987
47.2654
47.332
47.3987
47.4653
47.532
47.5987
47.6653
47.732
47.7987
47.8653
47.932
47.9987
48.0653
48.132
48.1987
48.2653
48.332
48.3987
48.4653
48.532
48.5986
48.6653
48.732
48.7986
48.8653
48.932
48.9986
49.0653
49.132
49.1986
49.2653
49.332
49.3986
49.4653
49.532
49.5986
49.6653
49.7319
49.7986
49.8653
49.9319
49.9986
50.0653
50.1319
50.1986
50.2653
50.3319
50.3986
50.4653
50.5319
50.5986
50.6653
50.7319
50.7986
50.8653
50.9319
50.9986
51.0652
51.1319
51.1986
51.2652
51.3319
51.3986
51.4652
51.5319
51.5986
51.6652
51.7319
51.7986
51.8652
51.9319
51.9986
52.0652
52.1319
52.1985
52.2652
52.3319
52.3985
52.4652
52.5319
52.5985
52.6652
52.7319
52.7985
52.8652
52.9319
52.9985
53.0652
53.1319
53.1985
53.2652
53.3318
53.3985
53.4652
53.5318
53.5985
53.6652
53.7318
53.7985
53.8652
53.9318
53.9985
54.0652
54.1318
54.1985
54.2652
54.3318
54.3985
54.4652
54.5318
54.5985
54.6651
54.7318
54.7985
54.8651
54.9318
54.9985
55.0651
55.1318
55.1985
55.2651
55.3318
55.3985
55.4651
55.5318
55.5985
55.6651
55.7318
55.7984
55.8651
55.9318
55.9984
56.0651
56.1318
56.1984
56.2651
56.3318
56.3984
56.4651
56.5318
56.5984
56.6651
56.7318
56.7984
56.8651
56.9317
56.9984
57.0651
57.1317
57.1984
57.2651
57.3317
57.3984
57.4651
57.5317
57.5984
57.6651
57.7317
57.7984
57.8651
57.9317
57.9984
58.0651
58.1317
58.1984
58.265
58.3317
58.3984
58.465
58.5317
58.5984
58.665
58.7317
58.7984
58.865
58.9317
58.9984
59.065
59.1317
59.1984
59.265
59.3317
59.3983
59.465
59.5317
59.5983
59.665
59.7317
59.7983
59.865
59.9317
59.9983
60.065
60.1317
60.1983
60.265
60.3317
60.3983
60.465
60.5316
60.5983
60.665
60.7316
60.7983
60.865
60.9316
60.9983
61.065
61.1316
61.1983
61.265
61.3316
61.3983
61.465
61.5316
61.5983
61.665
61.7316
61.7983
61.8649
61.9316
61.9983
62.0649
62.1316
62.1983
62.2649
62.3316
62.3983
62.4649
62.5316
62.5983
62.6649
62.7316
62.7983
62.8649
62.9316
62.9982
63.0649
63.1316
63.1982
63.2649
63.3316
63.3982
63.4649
63.5316
63.5982
63.6649
63.7316
63.7982
63.8649
63.9316
63.9982
64.0649
64.1315
64.1982
64.2649
64.3315
64.3982
64.4649
64.5315
64.5982
64.6649
64.7315
64.7982
64.8649
64.9315
64.9982
65.0649
65.1315
65.1982
65.2649
65.3315
65.3982
65.4648
65.5315
65.5982
65.6648
65.7315
65.7982
65.8648
65.9315
65.9982
66.0648
66.1315
66.1982
66.2648
66.3315
66.3982
66.4648
66.5315
66.5981
66.6648
66.7315
66.7981
66.8648
66.9315
66.9981
67.0648
67.1315
67.1981
67.2648
67.3315
67.3981
67.4648
67.5315
67.5981
67.6648
67.7314
67.7981
67.8648
67.9314
67.9981
68.0648
68.1314
68.1981
68.2648
68.3314
68.3981
68.4648
68.5314
68.5981
68.6648
68.7314
68.7981
68.8648
68.9314
68.9981
69.0647
69.1314
69.1981
69.2647
69.3314
69.3981
69.4647
69.5314
69.5981
69.6647
69.7314
69.7981
69.8647
69.9314
69.9981
70.0647
70.1314
70.198
70.2647
70.3314
70.398
70.4647
70.5314
70.598
70.6647
70.7314
70.798
70.8647
70.9314
70.998
71.0647
71.1314
71.198
71.2647
71.3313
71.398
71.4647
71.5313
71.598
71.6647
71.7313
71.798
71.8647
71.9313
71.998
72.0647
72.1313
72.198
72.2647
72.3313
72.398
72.4647
72.5313
72.598
72.6646
72.7313
72.798
72.8646
72.9313
72.998
73.0646
73.1313
73.198
73.2646
73.3313
73.398
73.4646
73.5313
73.598
73.6646
73.7313
73.7979
73.8646
73.9313
73.9979
74.0646
74.1313
74.1979
74.2646
74.3313
74.3979
74.4646
74.5313
74.5979
74.6646
74.7313
74.7979
74.8646
74.9312
74.9979
75.0646
75.1312
75.1979
75.2646
75.3312
75.3979
75.4646
75.5312
75.5979
75.6646
75.7312
75.7979
75.8646
75.9312
75.9979
76.0646
76.1312
76.1979
76.2645
76.3312
76.3979
76.4645
76.5312
76.5979
76.6645
76.7312
76.7979
76.8645
76.9312
76.9979
77.0645
77.1312
77.1979
77.2645
77.3312
77.3978
77.4645
77.5312
77.5978
77.6645
77.7312
77.7978
77.8645
77.9312
77.9978
78.0645
78.1312
78.1978
78.2645
78.3312
78.3978
78.4645
78.5311
78.5978
78.6645
78.7311
78.7978
78.8645
78.9311
78.9978
79.0645
79.1311
79.1978
79.2645
79.3311
79.3978
79.4645
79.5311
79.5978
79.6645
79.7311
79.7978
79.8644
79.9311
79.9978
80.0644
80.1311
80.1978
80.2644
80.3311
80.3978
80.4644
80.5311
80.5978
80.6644
80.7311
80.7978
80.8644
80.9311
80.9977
81.0644
81.1311
81.1977
81.2644
81.3311
81.3977
81.4644
81.5311
81.5977
81.6644
81.7311
81.7977
81.8644
81.9311
81.9977
82.0644
82.131
82.1977
82.2644
82.331
82.3977
82.4644
82.531
82.5977
82.6644
82.731
82.7977
82.8644
82.931
82.9977
83.0644
83.131
83.1977
83.2643
83.331
83.3977
83.4643
83.531
83.5977
83.6643
83.731
83.7977
83.8643
83.931
83.9977
84.0643
84.131
84.1977
84.2643
84.331
84.3977
84.4643
84.531
84.5976
84.6643
84.731
84.7976
84.8643
84.931
84.9976
85.0643
85.131
85.1976
85.2643
85.331
85.3976
85.4643
85.531
85.5976
85.6643
85.7309
85.7976
85.8643
85.9309
85.9976
86.0643
86.1309
86.1976
86.2643
86.3309
86.3976
86.4643
86.5309
86.5976
86.6643
86.7309
86.7976
86.8642
86.9309
86.9976
87.0642
87.1309
87.1976
87.2642
87.3309
87.3976
87.4642
87.5309
87.5976
87.6642
87.7309
87.7976
87.8642
87.9309
87.9976
88.0642
88.1309
88.1975
88.2642
88.3309
88.3975
88.4642
88.5309
88.5975
88.6642
88.7309
88.7975
88.8642
88.9309
88.9975
89.0642
89.1309
89.1975
89.2642
89.3308
89.3975
89.4642
89.5308
89.5975
89.6642
89.7308
89.7975
89.8642
89.9308
89.9975
90.0642
90.1308
90.1975
90.2642
90.3308
90.3975
90.4641
90.5308
90.5975
90.6641
90.7308
90.7975
90.8641
90.9308
90.9975
91.0641
91.1308
91.1975
91.2641
91.3308
91.3975
91.4641
91.5308
91.5975
91.6641
91.7308
91.7974
91.8641
91.9308
91.9974
92.0641
92.1308
92.1974
92.2641
92.3308
92.3974
92.4641
92.5308
92.5974
92.6641
92.7308
92.7974
92.8641
92.9307
92.9974
93.0641
93.1307
93.1974
93.2641
93.3307
93.3974
93.4641
93.5307
93.5974
93.6641
93.7307
93.7974
93.8641
93.9307
93.9974
94.064
94.1307
94.1974
94.264
94.3307
94.3974
94.464
94.5307
94.5974
94.664
94.7307
94.7974
94.864
94.9307
94.9974
95.064
95.1307
95.1974
95.264
95.3307
95.3973
95.464
95.5307
95.5973
95.664
95.7307
95.7973
95.864
95.9307
95.9973
96.064
96.1307
96.1973
96.264
96.3307
96.3973
96.464
96.5306
96.5973
96.664
96.7306
96.7973
96.864
96.9306
96.9973
97.064
97.1306
97.1973
97.264
97.3306
97.3973
97.464
97.5306
97.5973
97.6639
97.7306
97.7973
97.8639
97.9306
97.9973
98.0639
98.1306
98.1973
98.2639
98.3306
98.3973
98.4639
98.5306
98.5973
98.6639
98.7306
98.7973
98.8639
98.9306
98.9972
99.0639
99.1306
99.1972
99.2639
99.3306
99.3972
99.4639
99.5306
99.5972
99.6639
99.7306
99.7972
99.8639
99.9306
99.9972
100.064
100.131
100.197
100.264
100.331
100.397
100.464
100.531
100.597
100.664
100.731
100.797
100.864
100.931
100.997
101.064
101.131
101.197
101.264
101.331
101.397
101.464
101.531
101.597
101.664
101.731
101.797
101.864
101.93
101.997
102.064
102.13
102.197
102.264
102.33
102.397
102.464
102.53
102.597
102.664
102.73
102.797
102.864
102.93
102.997
103.064
103.13
103.197
103.264
103.33
103.397
103.464
103.53
103.597
103.664
103.73
103.797
103.864
103.93
103.997
104.064
104.13
104.197
104.264
104.33
104.397
104.464
104.53
104.597
104.664
104.73
104.797
104.864
104.93
104.997
105.064
105.13
105.197
105.264
105.33
105.397
105.464
105.53
105.597
105.664
105.73
105.797
105.864
105.93
105.997
106.064
106.13
106.197
106.264
106.33
106.397
106.464
106.53
106.597
106.664
106.73
106.797
106.864
106.93
106.997
107.064
107.13
107.197
107.264
107.33
107.397
107.464
107.53
107.597
107.664
107.73
107.797
107.864
107.93
107.997
108.064
108.13
108.197
108.264
108.33
108.397
108.464
108.53
108.597
108.664
108.73
108.797
108.864
108.93
108.997
109.064
109.13
109.197
109.264
109.33
109.397
109.464
109.53
109.597
109.664
109.73
109.797
109.864
109.93
109.997
110.064
110.13
110.197
110.264
110.33
110.397
110.464
110.53
110.597
110.664
110.73
110.797
110.864
110.93
110.997
111.064
111.13
111.197
111.264
111.33
111.397
111.464
111.53
111.597
111.664
111.73
111.797
111.864
111.93
111.997
112.064
112.13
112.197
112.264
112.33
112.397
112.464
112.53
112.597
112.664
112.73
112.797
112.864
112.93
112.997
113.064
113.13
113.197
113.264
113.33
113.397
113.464
113.53
113.597
113.664
113.73
113.797
113.863
113.93
113.997
114.063
114.13
114.197
114.263
114.33
114.397
114.463
114.53
114.597
114.663
114.73
114.797
114.863
114.93
114.997
115.063
115.13
115.197
115.263
115.33
115.397
115.463
115.53
115.597
115.663
115.73
115.797
115.863
115.93
115.997
116.063
116.13
116.197
116.263
116.33
116.397
116.463
116.53
116.597
116.663
116.73
116.797
116.863
116.93
116.997
117.063
117.13
117.197
117.263
117.33
117.397
117.463
117.53
117.597
117.663
117.73
117.797
117.863
117.93
117.997
118.063
118.13
118.197
118.263
118.33
118.397
118.463
118.53
118.597
118.663
118.73
118.797
118.863
118.93
118.997
119.063
119.13
119.197
119.263
119.33
119.397
119.463
119.53
119.597
119.663
119.73
119.797
119.863
119.93
119.997
120.063
120.13
120.197
120.263
120.33
120.397
120.463
120.53
120.597
120.663
120.73
120.797
120.863
120.93
120.997
121.063
121.13
121.197
121.263
121.33
121.397
121.463
121.53
121.597
121.663
121.73
121.797
121.863
121.93
121.997
122.063
122.13
122.197
122.263
122.33
122.397
122.463
122.53
122.597
122.663
122.73
122.797
122.863
122.93
122.997
123.063
123.13
123.197
123.263
123.33
123.397
123.463
123.53
123.597
123.663
123.73
123.797
123.863
123.93
123.997
124.063
124.13
124.197
124.263
124.33
124.397
124.463
124.53
124.597
124.663
124.73
124.797
124.863
124.93
124.997
125.063
125.13
125.197
125.263
125.33
125.397
125.463
125.53
125.597
125.663
125.73
125.796
125.863
125.93
125.996
126.063
126.13
126.196
126.263
126.33
126.396
126.463
126.53
126.596
126.663
126.73
126.796
126.863
126.93
126.996
127.063
127.13
127.196
127.263
127.33
127.396
127.463
127.53
127.596
127.663
127.73
127.796
127.863
127.93
127.996
128.063
128.13
128.196
128.263
128.33
128.396
128.463
128.53
128.596
128.663
128.73
128.796
128.863
128.93
128.996
129.063
129.13
129.196
129.263
129.33
129.396
129.463
129.53
129.596
129.663
129.73
129.796
129.863
129.93
129.996
130.063
130.13
130.196
130.263
130.33
130.396
130.463
130.53
130.596
130.663
130.73
130.796
130.863
130.93
130.996
131.063
131.13
131.196
131.263
131.33
131.396
131.463
131.53
131.596
131.663
131.73
131.796
131.863
131.93
131.996
132.063
132.13
132.196
132.263
132.33
132.396
132.463
132.53
132.596
132.663
132.73
132.796
132.863
132.93
132.996
133.063
133.13
133.196
133.263
133.33
[truncated: 68,848 more rows]

## Sheet: A_CorrectTrials_LoReward
-0.0118705
-0.0116559
-0.0114592
-0.0112847
-0.0111326
-0.0109977
-0.0108663
-0.0107228
-0.0105661
-0.0104032
-0.010243
-0.0100929
-0.00995788
-0.00983509
-0.00972317
-0.00962038
-0.00952352
-0.00943188
-0.00935162
-0.00928865
-0.00924618
-0.00922483
-0.00922209
-0.0092337
-0.00925493
-0.0092776
-0.00929365
-0.00929557
-0.0092782
-0.00924408
-0.00920787
-0.00917973
-0.00916231
-0.00915468
-0.00915424
-0.00915709
-0.00915778
-0.00915298
-0.00914379
-0.00913389
-0.00912727
-0.00912565
-0.00912463
-0.00911397
-0.00909179
-0.00906138
-0.00902718
-0.00899454
-0.00896981
-0.00895663
-0.00896005
-0.00898462
-0.00903197
-0.00909981
-0.00918272
-0.0092765
-0.00937867
-0.00948625
-0.00959551
-0.00970548
-0.00982138
-0.00994399
-0.0100682
-0.0101862
-0.0102911
-0.0103822
-0.0104715
-0.0105734
-0.0106893
-0.010813
-0.0109374
-0.0110559
-0.0111632
-0.0112576
-0.0113372
-0.0114012
-0.0114509
-0.0114882
-0.011512
-0.0115184
-0.0115081
-0.0114858
-0.0114579
-0.0114291
-0.0114
-0.0113752
-0.0113606
-0.0113618
-0.0113818
-0.0114184
-0.0114619
-0.0115062
-0.0115478
-0.0115839
-0.0116123
-0.0116342
-0.0116579
-0.0116925
-0.0117344
-0.0117734
-0.0117996
-0.0118084
-0.0118078
-0.0118163
-0.0118336
-0.0118486
-0.0118509
-0.0118316
-0.0117853
-0.0117143
-0.0116141
-0.0114792
-0.0113091
-0.0111058
-0.0108717
-0.0106178
-0.0103474
-0.0100614
-0.00976274
-0.00945062
-0.00911308
-0.00874955
-0.00836668
-0.00797535
-0.00758739
-0.00720573
-0.00681416
-0.00639758
-0.00595576
-0.00549694
-0.00503226
-0.00457033
-0.00411337
-0.00366446
-0.00323132
-0.00282189
-0.00244032
-0.0020841
-0.00174169
-0.00140124
-0.00106005
-0.000719454
-0.000381208
-4.88214e-05
0.00027199
0.000585125
0.000892526
0.00119525
0.00149525
0.00179156
0.00207766
0.00235235
0.00261166
0.00285066
0.00306703
0.00326186
0.00344105
0.00361719
0.00379297
0.00396616
0.00413486
0.00429525
0.0044404
0.00457422
0.00469754
0.00480967
0.00491141
0.00500158
0.00507274
0.00512098
0.00514525
0.00514776
0.00513373
0.00510758
0.00507057
0.00503071
0.00499254
0.00495802
0.00492853
0.00490143
0.00486745
0.00482503
0.00477484
0.00471835
0.00465789
0.0045941
0.0045225
0.00443724
0.00433704
0.00422413
0.00410261
0.00397669
0.00385097
0.00373441
0.00363133
0.00354221
0.0034654
0.00339618
0.00332564
0.00324812
0.00316129
0.00306475
0.00295949
0.00284788
0.0027357
0.00262966
0.00252628
0.00241668
0.00229305
0.00215224
0.00200016
0.00185229
0.0017123
0.00157712
0.00144231
0.00130112
0.00114155
0.000954305
0.000733186
0.000476427
0.000188043
-0.000124703
-0.000452679
-0.000782335
-0.00110661
-0.00142245
-0.00172876
-0.00203036
-0.00234636
-0.00269493
-0.00307187
-0.00345946
-0.00383797
-0.00419602
-0.00453823
-0.00487572
-0.00520944
-0.00553661
-0.00585504
-0.0061618
-0.00645533
-0.00674228
-0.00701303
-0.00725052
-0.00744308
-0.00758856
-0.00725052
-0.00744308
-0.00758856
-0.00769517
-0.00778064
-0.00785603
-0.00793039
-0.00801128
-0.00809549
-0.00816346
-0.00821044
-0.00822981
-0.00821459
-0.0081645
-0.00808356
-0.00797719
-0.00785975
-0.00774056
-0.00762558
-0.00751789
-0.00741279
-0.00729503
-0.00716062
-0.00700323
-0.00681648
-0.00660038
-0.00635932
-0.00610034
-0.0058385
-0.00558167
-0.0053324
-0.00508965
-0.00484673
-0.00458757
-0.00430026
-0.00397917
-0.00362519
-0.00324629
-0.0028523
-0.00245106
-0.00205468
-0.00167203
-0.0013077
-0.000961302
-0.000626066
-0.000284792
7.98351e-05
0.000471599
0.00088449
0.00130723
0.00172868
0.00214033
0.00253449
0.00290683
0.00325804
0.00359361
0.00392053
0.00424759
0.00458751
0.00494175
0.00530343
0.00566301
0.00601244
0.00634597
0.00666081
0.00695781
0.00724228
0.0075223
0.007803
0.00808531
0.00837687
0.00867551
0.00897171
0.00925554
0.00952139
0.00976999
0.0100063
0.0102327
0.0104518
0.0106675
0.0108807
0.0110906
0.0113074
0.0115259
0.0117314
0.0119113
0.0120593
0.0121773
0.0122729
0.0123494
0.0124106
0.0124616
0.0125032
0.0125293
0.0125442
0.0125439
0.0125201
0.0124689
0.0123899
0.0122814
0.0121487
0.0120011
0.0118519
0.0117127
0.0115846
0.0114507
0.0113012
0.0111296
0.0109321
0.0107101
0.0104691
0.0102151
0.00995711
0.00970617
0.00947288
0.0092632
0.009073
0.00888554
0.00868902
0.00847456
0.00823575
0.00797218
0.00768928
0.00739841
0.00711325
0.00684233
0.0065898
0.00635441
0.00612842
0.0058977
0.00565373
0.00538758
0.00509239
0.00476814
0.00442047
0.00406027
0.00370343
0.0033581
0.0030265
0.00270598
0.00238793
0.00205564
0.00169649
0.0013048
0.000881899
0.000436329
-2.22609e-05
-0.000488968
-0.000957634
-0.00141769
-0.00185858
-0.00227527
-0.00267183
-0.00306679
-0.00348144
-0.00391879
-0.00436999
-0.00482146
-0.00526087
-0.00568123
-0.00608
-0.00644921
-0.00678244
-0.00708093
-0.00735053
-0.00760099
-0.00785173
-0.00810872
-0.00836908
-0.00862685
-0.00887244
-0.00908971
-0.00926999
-0.00941001
-0.00951359
-0.00959202
-0.00965492
-0.00970568
-0.009759
-0.00982074
-0.00988923
-0.00995962
-0.0100233
-0.0100645
-0.0100749
-0.0100531
-0.0100048
-0.00994124
-0.00987074
-0.00979536
-0.00972691
-0.00966678
-0.00960812
-0.00954241
-0.00946164
-0.00935789
-0.00922982
-0.0090788
-0.00891047
-0.00873378
-0.0085532
-0.00836545
-0.00817685
-0.00798566
-0.00778434
-0.00756611
-0.00732648
-0.00706164
-0.00677278
-0.0064646
-0.00614602
-0.00582755
-0.0055125
-0.00519188
-0.00486479
-0.00452985
-0.00418427
-0.00382688
-0.00345722
-0.00307125
-0.00266499
-0.00224518
-0.00182555
-0.00141929
-0.00103082
-0.000650665
-0.000271194
0.000109151
0.0004901
0.000870507
0.00124834
0.00162382
0.00200288
0.0023784
0.00273681
0.00306795
0.00336909
0.0036463
0.00391081
0.00416807
0.00442174
0.00467446
0.00492344
0.00515851
0.0053786
0.00557689
0.00588045
0.00598556
0.00606557
0.00613493
0.00620287
0.00627548
0.00635606
0.00643925
0.00650758
0.00655444
0.00657245
0.00655561
0.00650503
0.00642589
0.00632709
0.00623002
0.00614271
0.00606416
0.00598955
0.00590844
0.00580177
0.00566085
0.00547977
0.00525751
0.005001
0.00471881
0.00441842
0.00411863
0.00382642
0.00354035
0.003256
0.00296407
0.00264464
0.00228491
0.0018861
0.00146008
0.001024
0.000589152
0.000154131
-0.000277962
-0.000705249
-0.00112902
-0.0015519
-0.00197722
-0.0024112
-0.00285792
-0.0033114
-0.0037596
-0.00419098
-0.00460147
-0.00500128
-0.00540662
-0.00582149
-0.00624389
-0.00667035
-0.00709453
-0.00750696
-0.00790593
-0.00828351
-0.00862963
-0.00893901
-0.00921326
-0.00946463
-0.00971491
-0.00996698
-0.0102141
-0.0104498
-0.0106661
-0.0108519
-0.0110115
-0.0111464
-0.011258
-0.0113506
-0.0114254
-0.011473
-0.0114906
-0.0114771
-0.0114335
-0.0113655
-0.0112778
-0.011171
-0.0110579
-0.0109473
-0.0108451
-0.0107553
-0.0106739
-0.0105821
-0.0104716
-0.01034
-0.0101882
-0.0100204
-0.00984091
-0.00965403
-0.00946911
-0.00928466
-0.00909308
-0.0088876
-0.00866424
-0.00842557
-0.00818817
-0.00795483
-0.00772047
-0.00747983
-0.0072259
-0.00694752
-0.00664087
-0.00630013
-0.00592089
-0.00550445
-0.00505553
-0.00457945
-0.00408732
-0.00358591
-0.00308058
-0.00257682
-0.0020731
-0.001553
-0.00100919
-0.000446592
0.000123201
0.000687423
0.00124095
0.00179548
0.00236575
0.00295201
0.00354688
0.00414162
0.00472892
0.0053046
0.00586645
0.00640771
0.00692137
0.00740438
0.00785918
0.00829438
0.00872075
0.00914174
0.00955816
0.00997121
0.010379
0.0107733
0.0111552
0.0115288
0.0118994
0.0122726
0.0126488
0.0130177
0.0133714
0.0137072
0.014026
0.014331
0.0146267
0.0149208
0.0152284
0.0155522
0.0158862
0.016223
0.016555
0.0168768
0.0171951
0.0175069
0.0178042
0.018081
0.0183342
0.0185642
0.0187762
0.018966
0.0191268
0.0192562
0.0193551
0.0194274
0.0194891
0.0195474
0.0196048
0.0196633
0.0197183
0.0197508
0.0197513
0.019719
0.0196586
0.0195795
0.0194888
0.0193868
0.0192784
0.019166
0.01905
0.0189312
0.0188082
0.0186771
0.0185448
0.0184159
0.0182922
0.018175
0.0180608
0.0179402
0.0178088
0.0176597
0.0174856
0.017283
0.0170542
0.0168114
0.0165755
0.0163496
0.0161267
0.0158988
0.0156572
0.0153917
0.0151041
0.0147935
0.0144585
0.0141016
0.0137245
0.0133229
0.0128954
0.0124421
0.0119656
0.0114716
0.0109644
0.010441
0.00990546
0.00936753
0.00883942
0.00833173
0.00784449
0.00735817
0.00685468
0.0063326
0.00579916
0.00526357
0.004734
0.00421539
0.00370724
0.00321155
0.00273031
0.00226338
0.00180986
0.0013697
0.000941992
0.000529012
0.000133328
-0.000244874
-0.000607226
-0.000958233
-0.00131183
-0.00167341
-0.00204299
0.00431255
0.0043953
0.00448575
0.00457254
0.00464812
0.00470781
0.00474981
0.0047787
0.00481091
0.00486321
0.00493852
0.00503129
0.0051328
0.00523429
0.00532865
0.00541336
0.0054861
0.00554574
0.00559333
0.00563101
0.00566144
0.00568617
0.0057019
0.0057037
0.00568865
0.00565702
0.00561316
0.00556762
0.0055278
0.0054992
0.00548521
0.00548221
0.00547495
0.00545155
0.00540675
0.00533958
0.00525283
0.00515243
0.00504915
0.00495684
0.00487796
0.00480791
0.00474025
0.00466824
0.00458567
0.0044941
0.00439395
0.00428551
0.00417043
0.00404905
0.00391748
0.00377142
0.00360727
0.00342312
0.00322007
0.00300158
0.00277249
0.00254095
0.00231489
0.00210186
0.00190712
0.00172826
0.00154879
0.00135287
0.0011387
0.000912337
0.000682038
0.000455382
0.000237384
2.78751e-05
-0.000171803
-0.000360475
-0.000538663
-0.000707264
-0.000866017
-0.00101404
-0.00114836
-0.00126611
-0.00136685
-0.00145256
-0.00152797
-0.00160341
-0.00168551
-0.00177841
-0.00188438
-0.00199969
-0.00210992
-0.00220324
-0.00227687
-0.00233348
-0.00237859
-0.00241827
-0.00245896
-0.002507
-0.00256332
-0.00262528
-0.0026892
-0.00275178
-0.00281237
-0.00287748
-0.00294887
-0.00302504
-0.00310361
-0.00318108
-0.00325291
-0.00331632
-0.00336455
-0.0033898
-0.00338789
-0.0033607
-0.00331916
-0.00327922
-0.00324552
-0.00321683
-0.00319062
-0.00316105
-0.00311563
-0.00304876
-0.00295991
-0.00285255
-0.00273307
-0.00260601
-0.00247005
-0.0023249
-0.00217069
-0.00200806
-0.00183872
-0.00166388
-0.0014836
-0.0013046
-0.00113221
-0.000970034
-0.000820053
-0.000679317
-0.000536524
-0.000382018
-0.000211545
-2.42188e-05
0.000178182
0.000391154
0.000606474
0.000816112
0.00101796
0.00121337
0.0014048
0.00159571
0.00178985
0.00198488
0.00217941
0.00237298
0.00256532
0.0027578
0.00295579
0.00316644
0.00339389
0.00363941
0.00390154
0.00417588
0.00445521
0.00473255
0.00500191
0.00525822
0.00549844
0.00572489
0.00594966
0.00618529
0.00643082
0.00667809
0.00691845
0.00714623
0.00736267
0.0075781
0.00779318
0.00800375
0.00820617
0.00839631
0.00856706
0.00871396
0.00883321
0.00892368
0.00898844
0.0090322
0.00906
0.00908314
0.00910734
0.00913523
0.00916861
0.0092041
0.00922832
0.00923602
0.00922903
0.00921291
0.00919453
0.00917714
0.00915725
0.00913247
0.00909983
0.00905609
0.00899989
0.00893248
0.00885993
0.00879539
0.00874443
0.0087072
0.00868125
0.00866024
0.00863144
0.00858411
0.00851262
0.00841575
0.00829662
0.00816158
0.00802139
0.00788934
0.00776841
0.0076553
0.00754498
0.00743125
0.00730377
0.00715509
0.00698836
0.00681377
0.00664276
0.00648125
0.0063261
0.00617357
0.00601905
0.00585671
0.00568242
0.00549654
0.00530496
0.00511497
0.0049353
0.00477494
0.00463895
0.00452449
0.00441841
0.00430745
0.0041819
0.00403457
0.00386298
0.00367243
0.00347979
0.00330273
0.0031485
0.00301726
0.00347979
0.00330273
0.0031485
0.00301726
0.00290402
0.00279957
0.00268903
0.00255841
0.00240234
0.00222248
0.00202551
0.00182024
0.00161873
0.00143585
0.00127388
0.00112597
0.000981945
0.000832363
0.000669907
0.000491944
0.000298874
9.46187e-05
-0.000114714
-0.000325135
-0.000535579
-0.000741585
-0.000948546
-0.0011679
-0.00140941
-0.00167632
-0.00196327
-0.00226011
-0.00255955
-0.00285461
-0.00313952
-0.00341603
-0.003701
-0.00401126
-0.00435088
-0.00471571
-0.0050972
-0.00548586
-0.00587488
-0.00626052
-0.00663411
-0.00698547
-0.00730832
-0.0076043
-0.00788766
-0.00817447
-0.00846458
-0.00874994
-0.00902251
-0.00927603
-0.00950851
-0.00973089
-0.00994487
-0.0101482
-0.0103403
-0.0105183
-0.0106753
-0.010818
-0.010941
-0.0110337
-0.0110892
-0.0111059
-0.0110894
-0.0110626
-0.0110275
-0.0109758
-0.0109016
-0.0107977
-0.0106548
-0.0104866
-0.0102926
-0.0100656
-0.0098032
-0.00950211
-0.0091518
-0.00875657
-0.00831773
-0.00783796
-0.00732543
-0.00678419
-0.00620515
-0.00559434
-0.00496011
-0.00431255
-0.00366369
-0.00301525
-0.00234754
-0.00165348
-0.000938093
-0.000212215
0.00051198
0.00122994
0.00195332
0.00269208
0.0034455
0.00420741
0.00497027
0.00572854
0.00648034
0.0072216
0.00794756
0.00865516
0.00934409
0.0100175
0.0106847
0.0113585
0.0120403
0.012725
0.0134067
0.0140801
0.0147415
0.0153975
0.0160483
0.0166913
0.0173248
0.0179462
0.0185513
0.0191413
0.0197115
0.0202561
0.0207728
0.0212631
0.0217343
0.0222068
0.0226852
0.0231647
0.0236397
0.024102
0.0245396
0.0249571
0.0253507
0.0257137
0.0260435
0.0263403
0.0266067
0.0268599
0.0270979
0.0273097
0.0274874
0.027626
0.0277229
0.0277976
0.0278548
0.0278925
0.0279108
0.0279047
0.0278561
0.0277632
0.0276237
0.0274373
0.0272108
0.02695
0.0266531
0.0263333
0.0259987
0.0256545
0.0253068
0.0249535
0.0245741
0.024163
0.0237245
0.0232691
0.0228096
0.0223512
0.0218825
0.0213949
0.0208883
0.0203674
0.0198393
0.0193091
0.0187788
0.0182566
0.0177495
0.0172618
0.0167947
0.0163434
0.0158951
0.0154393
0.0149714
0.0144899
0.0139957
0.0134928
0.0129898
0.0124915
0.0119971
0.0115032
0.0110064
0.0105048
0.00999958
0.00949438
0.00899405
0.00850378
0.00802717
0.00756283
0.00709958
0.00662158
0.0061249
0.00561305
0.00509211
0.00456982
0.00405525
0.00355301
0.00306801
0.00260409
0.00216178
0.00173826
0.0013266
0.000918255
0.000513301
0.000115653
-0.00027152
-0.000645708
-0.00100524
-0.00135805
-0.00170805
-0.002057
-0.00240666
-0.0027547
-0.00309006
-0.00340483
-0.0036955
-0.00396204
-0.00420811
-0.00443893
-0.00466074
-0.00488419
-0.00511452
-0.00535344
-0.00560115
-0.00585348
-0.00609963
-0.0063368
-0.00656525
-0.00678663
-0.00700357
-0.00721737
-0.00742769
-0.00763674
-0.00783951
-0.0080274
-0.00819409
-0.00833871
-0.00954494
-0.00954639
-0.00952606
-0.00948949
-0.00944644
-0.00940066
-0.00935276
-0.00930325
-0.00924932
-0.00918048
-0.00909456
-0.0089974
-0.00889914
-0.00880993
-0.00873255
-0.00865644
-0.00857091
-0.00847099
-0.0083548
-0.00822339
-0.00808143
-0.00793798
-0.00780324
-0.00768533
-0.00758995
-0.00751866
-0.00746654
-0.00741747
-0.00735188
-0.0072657
-0.0071643
-0.00705624
-0.00695122
-0.00685949
-0.00678408
-0.00672786
-0.00669199
-0.0066742
-0.00667111
-0.00667981
-0.00669614
-0.00672195
-0.00676166
-0.00681791
-0.00689142
-0.00698243
-0.00708554
-0.00719258
-0.00729341
-0.007379
-0.00744938
-0.00752195
-0.00761385
-0.00772815
-0.00786004
-0.00800173
-0.0081449
-0.00828275
-0.00841219
-0.00852784
-0.00862436
-0.00869944
-0.00875498
-0.00879785
-0.00883493
-0.00886597
-0.00888799
-0.00889898
-0.00889761
-0.00888407
-0.00886809
-0.00885341
-0.00884042
-0.00882926
-0.00881643
-0.0087914
-0.00874916
-0.00868622
-0.0086008
-0.00849426
-0.00836989
-0.00823264
-0.00809166
-0.00794896
-0.00780313
-0.00765315
-0.00749648
-0.00732836
-0.00715485
-0.00697869
-0.00680028
-0.00662008
-0.00643554
-0.00623753
-0.00601983
-0.00577854
-0.00551248
-0.00522427
-0.00491867
-0.00460314
-0.0042922
-0.00399064
-0.00369707
-0.00340857
-0.00311898
-0.00281638
-0.00249657
-0.00215952
-0.00180806
-0.0014472
-0.00108012
-0.00070556
-0.000323402
6.89379e-05
0.000474847
0.000895618
0.00133025
0.00177565
0.00222282
0.0026643
0.00309401
0.0035082
0.00390996
0.00431537
0.00474149
0.0051926
0.00566485
0.00615054
0.00664069
0.00712639
0.00760159
0.00806096
0.00850095
0.00892144
0.00932608
0.00972533
0.0101325
0.0105459
0.0109558
0.0113526
0.0117298
0.0120871
0.0124345
0.0127754
0.0131105
0.0134411
0.0137648
0.0140738
0.0143696
0.0146449
0.0148891
0.0150965
0.0152674
0.015412
0.0155552
0.0157026
0.0158493
0.0159895
0.0161136
0.0162051
0.0162626
0.0162825
0.0162616
0.0162036
0.0161126
0.0159907
0.0158513
0.0156973
0.0155263
0.0153379
0.0151288
0.0148875
0.0146179
0.0143269
0.0140232
0.0137175
0.0134116
0.0130885
0.0127375
0.012357
0.0119507
0.0115265
0.011091
0.0106472
0.0102036
0.00976792
0.00934576
0.00894053
0.00854881
0.00815516
0.00774796
0.00732687
0.00689747
0.00646673
0.00604003
0.00561888
0.00519998
0.00478171
0.00436308
0.00394334
0.00352363
0.00310886
0.00270542
0.00231894
0.00195329
0.00160896
0.00128201
0.000961377
0.000630413
0.000282979
-8.03141e-05
-0.000455906
-0.000836145
-0.0012065
-0.00155683
-0.001884
-0.00219004
-0.00248044
-0.00276132
-0.00304106
-0.00333277
-0.00363459
-0.00393558
-0.00422467
-0.00449484
-0.00474499
-0.00498337
-0.00521503
-0.00544404
-0.00567416
-0.00590398
-0.00612508
-0.00633579
-0.00652692
-0.00668617
-0.00680693
-0.00689072
-0.00694842
-0.00699932
-0.00705474
-0.00712163
-0.00720338
-0.00729365
-0.00737038
-0.00741893
-0.00743185
-0.0120728
-0.0118531
-0.0116389
-0.0114376
-0.0112533
-0.011082
-0.0109045
-0.0107038
-0.0104748
-0.0102193
-0.00994454
-0.00965965
-0.00937486
-0.00910012
-0.00884149
-0.00860134
-0.00837823
-0.00816667
-0.00795411
-0.00772776
-0.00748788
-0.00724263
-0.00700177
-0.00677247
-0.00655697
-0.00635152
-0.00615385
-0.0059612
-0.00576995
-0.00557958
-0.00539538
-0.00522019
-0.00505904
-0.00491774
-0.00479908
-0.00470142
-0.00461664
-0.00453054
-0.00443696
-0.00433422
-0.00422248
-0.004107
-0.00400187
-0.00391506
-0.00384984
-0.00380602
-0.00378006
-0.00376714
-0.00376259
-0.00376066
-0.00376028
-0.00376281
-0.00376937
-0.00378167
-0.00380293
-0.00383013
-0.00385853
-0.00388279
-0.00389825
-0.00390552
-0.00391549
-0.00394023
-0.00398336
-0.00404326
-0.00411558
-0.00419419
-0.0042709
-0.00433749
-0.0043891
-0.00442386
-0.00444263
-0.00444962
-0.00445353
-0.00446134
-0.00447374
-0.00448829
-0.00450201
-0.00451219
-0.00451698
-0.00451996
-0.00452432
-0.0045328
-0.00454741
-0.00456681
-0.00458343
-0.00458878
-0.00457806
-0.00454942
-0.00450385
-0.00444584
-0.00438518
-0.00433402
-0.00429719
-0.00427474
-0.00426419
-0.0042599
-0.00425154
-0.00423261
-0.00420165
-0.0041604
-0.00411228
-0.0040607
-0.00400859
-0.00395776
-0.00390551
-0.00384686
-0.00377777
-0.00369743
-0.00361088
-0.00352906
-0.00345684
-0.0033952
-0.00334318
-0.00329603
-0.00324224
-0.00317122
-0.00307761
-0.0029603
-0.00282211
-0.00266907
-0.00251047
-0.00235563
-0.00220882
-0.0020712
-0.00194218
-0.00181804
-0.00168951
-0.00155103
-0.00140475
-0.00125704
-0.00111465
-0.000980794
-0.000851643
-0.000719468
-0.000580896
-0.000434884
-0.000281658
-0.000124345
2.90926e-05
0.000170732
0.000294937
0.000398415
0.000481209
0.000547578
0.000607919
0.000674894
0.000752772
0.000840871
0.000936562
0.00103449
0.00112528
0.00120533
0.00127417
0.00133345
0.00138637
0.00143528
0.00147936
0.00151642
0.00154424
0.00156122
0.00156731
0.0015643
0.00155717
0.00155591
0.00156585
0.00158894
0.00162499
0.00166947
0.00171137
0.00174315
0.00176046
0.00176115
0.00174566
0.00171742
0.0016843
0.0016546
0.00162822
0.00160075
0.00156776
0.00152605
0.00147531
0.00142311
0.00137231
0.001323
0.00127492
0.00122502
0.00116395
0.00108309
0.00097836
0.000849711
0.000700766
0.000537177
0.000366415
0.000199282
4.07761e-05
-0.000107886
-0.000247223
-0.000381559
-0.000522458
-0.000677207
-0.000844482
-0.00101811
-0.00119093
-0.00135887
-0.00152389
-0.00169093
-0.00186306
-0.00204227
-0.00222923
-0.00242186
-0.00261352
-0.00279462
-0.00295862
-0.00310204
-0.00322503
-0.00333268
-0.00343687
-0.00355048
-0.00368035
-0.00382917
-0.00399602
-0.00417499
-0.00435121
-0.0045094
-0.00464747
-0.00477156
-0.00489058
-0.00501281
-0.00514533
-0.00529234
-0.00545348
-0.00562449
-0.00579942
-0.00597434
-0.00614971
-0.00632791
-0.00651276
-0.00670861
-0.00691796
-0.00713975
-0.00736888
-0.00759778
-0.0078178
-0.0080201
-0.00819916
-0.00835758
-0.00819916
-0.00835758
-0.00851108
-0.0086769
-0.00886159
-0.00906537
-0.00928466
-0.00951166
-0.00973095
-0.00992715
-0.0100962
-0.0102424
-0.0103739
-0.0105
-0.0106288
-0.010765
-0.0109113
-0.0110679
-0.011233
-0.0114038
-0.0115763
-0.0117504
-0.0119299
-0.0121203
-0.0123256
-0.0125455
-0.0127745
-0.0130044
-0.0132275
-0.0134363
-0.0136256
-0.013798
-0.0139691
-0.014155
-0.0143603
-0.0145828
-0.0148175
-0.015057
-0.0152918
-0.0155174
-0.0157304
-0.0159283
-0.0161115
-0.0162822
-0.0164458
-0.0166077
-0.0167658
-0.0169146
-0.0170496
-0.0171689
-0.0172775
-0.0173913
-0.0175134
-0.0176397
-0.0177651
-0.0178827
-0.0179828
-0.0180648
-0.018123
-0.01815
-0.0181433
-0.0181046
-0.0180418
-0.0179729
-0.0178992
-0.017814
-0.017712
-0.0175876
-0.0174331
-0.0172585
-0.0170669
-0.0168591
-0.0166376
-0.0164008
-0.0161361
-0.0158407
-0.0155108
-0.0151445
-0.0147451
-0.0143173
-0.0138643
-0.0134026
-0.0129405
-0.0124814
-0.0120276
-0.0115738
-0.0110988
-0.0105902
-0.0100483
-0.00948142
-0.00890209
-0.00831878
-0.00773022
-0.00713693
-0.00654072
-0.0059433
-0.00534636
-0.00474986
-0.0041491
-0.00354344
-0.00293988
-0.00234869
-0.00177808
-0.00122886
-0.000689579
-0.00014459
0.000412266
0.000982033
0.00156305
0.00214907
0.00272753
0.00329076
0.00383188
0.00434572
0.00483192
0.00529504
0.005748
0.00621132
0.00668738
0.00716797
0.00764322
0.0081035
0.00854024
0.00895704
0.00935322
0.00972755
0.0100822
0.0104184
0.0107357
0.0110441
0.0113397
0.0116112
0.0118509
0.0120551
0.0122251
0.0123774
0.0125187
0.0126518
0.0127796
0.0128982
0.0129904
0.0130509
0.0130754
0.0130614
0.0130126
0.0129343
0.012832
0.0127248
0.0126194
0.0125151
0.0124098
0.0122964
0.0121575
0.0119903
0.0117943
0.0115714
0.0113278
0.0110677
0.0107886
0.0104945
0.0101848
0.00985701
0.00951095
0.0091466
0.00876184
0.00836469
0.00796298
0.00756444
0.00717613
0.00679656
0.00640703
0.0059915
0.00554756
0.00508097
0.00460099
0.00411631
0.00363178
0.00315066
0.00267779
0.00221795
0.00177388
0.00134426
0.000920947
0.000496861
7.52117e-05
-0.000336366
-0.000731647
-0.00110841
-0.0014714
-0.00183451
-0.00220252
-0.00257518
-0.00295107
-0.00332489
-0.00368374
-0.00401867
-0.00432446
-0.00459975
-0.00484806
-0.00507559
-0.00529195
-0.00551371
-0.00574532
-0.00598382
-0.00622467
-0.0064607
-0.00668017
-0.00688162
-0.00706601
-0.00723631
-0.00739748
-0.00755201
-0.00769942
-0.00784676
-0.00798803
-0.00811005
-0.00820271
-0.00826261
-0.0082955
-0.00831846
-0.00833933
-0.00836147
-0.00838692
-0.00841066
-0.00841549
-0.00839217
-0.00833342
-0.00823509
-0.00810012
-0.00793541
-0.00774936
-0.00755734
-0.00736932
-0.00719154
-0.00702707
-0.0068704
-0.0066996
-0.00649711
-0.0062614
-0.00600156
-0.00573167
-0.00546304
-0.00520041
-0.00495041
-0.00471627
-0.00449663
-0.00428699
-0.00408155
-0.00387132
-0.00364599
-0.00340837
-0.00316962
-0.00294164
-0.00273124
-0.00253838
-0.00236072
-0.00219357
-0.00202895
-0.00185872
-0.00168059
-0.00150124
-0.00132437
-0.0011567
-0.00100671
-0.00087971
-0.000774725
-0.000681882
-0.000585902
-0.000479166
-0.000358567
-0.0002242
-8.23077e-05
5.21566e-05
0.000169425
0.000261997
0.000325031
0.000359157
0.000370117
[truncated: 34,408 more rows]

## Sheet: A_CorrectTrials_HiReward
-0.00773177
-0.00777232
-0.00781569
-0.00785923
-0.00789925
-0.00793409
-0.0079629
-0.0079859
-0.00800475
-0.00802383
-0.00805269
-0.0080979
-0.00816275
-0.00824714
-0.00834588
-0.00844643
-0.00853555
-0.00860596
-0.00865461
-0.00868235
-0.00869535
-0.0087084
-0.0087361
-0.0087816
-0.008841
-0.00890774
-0.00897451
-0.00903449
-0.00908735
-0.00913294
-0.00917178
-0.0092056
-0.0092353
-0.00926018
-0.00928032
-0.00929034
-0.00928254
-0.00925181
-0.0091984
-0.00913189
-0.00907033
-0.00901949
-0.00897816
-0.0089433
-0.00890763
-0.00885708
-0.00878591
-0.0086893
-0.00856425
-0.0084121
-0.00823695
-0.00804645
-0.00785498
-0.00766298
-0.00746352
-0.00725044
-0.00701838
-0.00676354
-0.00649735
-0.00622333
-0.00594098
-0.00565065
-0.00534889
-0.00502347
-0.00466877
-0.00427968
-0.00385345
-0.00339306
-0.00290409
-0.00239149
-0.00186682
-0.00133953
-0.000818011
-0.000309178
0.000189464
0.000699143
0.00123588
0.00179745
0.00237139
0.00294295
0.00350314
0.00405635
0.00461274
0.00517092
0.00572427
0.00626696
0.00679495
0.00730656
0.00780304
0.00827882
0.00872674
0.00914351
0.00953047
0.00989478
0.0102521
0.0106078
0.0109624
0.0113163
0.0116651
0.0119958
0.0123085
0.0126027
0.0128781
0.013137
0.0133807
0.013606
0.0138146
0.0140062
0.0141802
0.0143382
0.0144818
0.0146116
0.0147397
0.0148707
0.0150042
0.0151392
0.0152711
0.0153894
0.015495
0.0155847
0.0156534
0.0156988
0.0157211
0.0157219
0.0157085
0.0156805
0.0156347
0.0155702
0.0154867
0.0153828
0.015267
0.0151444
0.0150185
0.0148931
0.0147662
0.0146232
0.0144548
0.0142608
0.0140471
0.0138223
0.0135926
0.0133556
0.0131085
0.0128548
0.0126019
0.0123569
0.0121227
0.0118958
0.0116757
0.0114661
0.0112715
0.0110942
0.0109327
0.0107804
0.0106274
0.0104703
0.0103093
0.0101448
0.00997994
0.00982307
0.00967787
0.00954388
0.00941813
0.00929657
0.00917707
0.00906352
0.00896261
0.00887474
0.00879599
0.00872105
0.00864522
0.0085649
0.00847395
0.0083675
0.00824312
0.00810104
0.00794512
0.00778443
0.00762856
0.00748019
0.00733819
0.00720037
0.00706305
0.00691988
0.00676907
0.00661254
0.00645425
0.00629836
0.00614605
0.00599183
0.00582679
0.00564779
0.00545571
0.00525359
0.00504636
0.00484263
0.00465431
0.00448672
0.00433991
0.00421051
0.0040919
0.00397365
0.00384781
0.0037102
0.00355917
0.0033953
0.00322209
0.00304752
0.00287738
0.00270949
0.00253773
0.00235647
0.00216332
0.00196057
0.00175497
0.00155227
0.00135775
0.00117513
0.00100243
0.000826842
0.000633667
0.000417981
0.000181367
-7.09319e-05
-0.000331229
-0.000588452
-0.000830625
-0.00105223
-0.00125291
-0.00143598
-0.00160798
-0.00177956
-0.00195902
-0.00214817
-0.00234492
-0.00254567
-0.00274639
-0.00294257
-0.00313396
-0.00332414
-0.00351879
-0.00372283
-0.00393699
-0.00415627
-0.00437548
-0.00458735
-0.00437548
-0.00458735
-0.00478347
-0.00495821
-0.005113
-0.00526191
-0.0054244
-0.00560566
-0.0058024
-0.00600827
-0.00621419
-0.00640687
-0.00657709
-0.00671973
-0.00683393
-0.0069236
-0.00699509
-0.00705568
-0.00711278
-0.00716894
-0.0072243
-0.00727865
-0.00732976
-0.00737124
-0.00740373
-0.00743274
-0.00746627
-0.00751165
-0.0075697
-0.00762936
-0.00767893
-0.0077134
-0.00773138
-0.00773412
-0.00772671
-0.00771974
-0.00772333
-0.0077431
-0.00778132
-0.0078373
-0.0079064
-0.00797978
-0.00805263
-0.00812269
-0.00818862
-0.00824996
-0.00830777
-0.00836518
-0.00842218
-0.00847573
-0.00852167
-0.00855671
-0.00858119
-0.00860332
-0.00863626
-0.00868273
-0.00873923
-0.00880092
-0.00886178
-0.00891647
-0.00896784
-0.00901149
-0.00903933
-0.00904539
-0.00902789
-0.00899281
-0.00895304
-0.00890504
-0.00883782
-0.00874303
-0.00861683
-0.00846383
-0.00830607
-0.00814566
-0.00797423
-0.00778457
-0.0075685
-0.00731299
-0.00701734
-0.00667917
-0.00629835
-0.00588093
-0.0054321
-0.00495024
-0.0044449
-0.0039214
-0.00338363
-0.00283726
-0.00228172
-0.00170157
-0.00109387
-0.00046598
0.000169323
0.000798415
0.00141732
0.00204128
0.00268369
0.00334651
0.00402565
0.00471406
0.00540492
0.00609431
0.00677786
0.00744708
0.00809311
0.00871111
0.00930363
0.00988676
0.0104831
0.0110949
0.0117125
0.0123248
0.0129213
0.0134938
0.0140457
0.0145748
0.015078
0.0155562
0.0160108
0.0164434
0.0168666
0.017277
0.0176638
0.0180193
0.0183394
0.0186236
0.0188886
0.0191411
0.0193835
0.0196187
0.0198426
0.020037
0.0201964
0.0203159
0.0203931
0.0204323
0.0204394
0.0204198
0.0203923
0.0203647
0.0203384
0.0203133
0.0202828
0.0202264
0.0201366
0.0200145
0.0198668
0.0197043
0.0195336
0.0193512
0.0191589
0.0189562
0.0187411
0.0185133
0.0182727
0.0180185
0.0177598
0.0175041
0.0172577
0.0170247
0.0168021
0.016574
0.0163275
0.0160567
0.0157598
0.0154398
0.0151031
0.0147612
0.014428
0.0141086
0.013802
0.0135049
0.0132109
0.0129069
0.0125817
0.0122368
0.0118813
0.0115263
0.0111789
0.0108374
0.0104951
0.0101501
0.00980324
0.00945556
0.00910964
0.00876733
0.00842618
0.00809597
0.00779221
0.00752594
0.00729843
0.0070962
0.00689602
0.00669068
0.00648113
0.00627031
0.00606659
0.00588874
0.0057471
0.00564707
0.00558834
0.00556345
0.00556364
0.00558215
0.00560407
0.00562271
0.00563688
0.00564732
0.0056602
0.00569325
0.00575668
0.00584756
0.00595432
0.00606247
0.00616385
0.00626199
0.00635745
0.00645223
0.00655074
0.00665696
0.00677241
0.00689623
0.00702511
0.00715166
0.0072662
0.00736131
0.00743715
0.00750561
0.00757971
0.00766638
0.00776918
0.00788842
0.00801894
0.00814811
0.00826523
0.00836339
0.00843876
0.00849191
0.00852832
0.0085627
0.00861542
0.0086892
0.00877565
0.00886348
0.0089418
0.00900264
0.00900264
0.00904794
0.00907474
0.0090792
0.00906115
0.00902205
0.00896488
0.00889902
0.00882095
0.00872103
0.00859253
0.00843257
0.00824153
0.00803058
0.00780788
0.00758124
0.00735862
0.00713874
0.00690128
0.00663156
0.00632731
0.00599415
0.0056423
0.00528085
0.00491249
0.00454103
0.00417407
0.00382021
0.00348567
0.00316953
0.00286001
0.00254983
0.00224019
0.00193544
0.00163965
0.00135482
0.00108011
0.000811118
0.000543967
0.00027445
-1.48957e-06
-0.000283347
-0.000562332
-0.000831818
-0.00108942
-0.00133511
-0.00157048
-0.00179836
-0.00202275
-0.00224819
-0.00247663
-0.00270855
-0.00294385
-0.00318113
-0.0034193
-0.00366469
-0.0039166
-0.00416957
-0.00441803
-0.00465766
-0.00488681
-0.00510786
-0.00531721
-0.00550912
-0.00568007
-0.00582983
-0.00596316
-0.00609104
-0.00621416
-0.00632854
-0.00643149
-0.00651999
-0.0065905
-0.0066519
-0.00670588
-0.00675043
-0.00678458
-0.0068051
-0.00680264
-0.00677477
-0.00671927
-0.00663585
-0.0065282
-0.00640035
-0.00625562
-0.00610797
-0.0059613
-0.00581358
-0.00566271
-0.00550362
-0.00532654
-0.0051361
-0.00493332
-0.00471733
-0.00448888
-0.00424664
-0.0039846
-0.00370441
-0.00340178
-0.00307054
-0.00270871
-0.00231775
-0.00190394
-0.00148751
-0.00107399
-0.000660527
-0.000243754
0.000183833
0.000637945
0.00112174
0.00163687
0.00218253
0.00275332
0.00334501
0.00395994
0.00459513
0.00524875
0.00591855
0.00660025
0.00729234
0.00800127
0.00872469
0.00945507
0.0101825
0.0108975
0.0115993
0.0123054
0.0130355
0.0137902
0.0145595
0.0153305
0.0160932
0.0168456
0.0175944
0.0183325
0.0190468
0.0197275
0.0203721
0.0209909
0.0216044
0.0222092
0.0227907
0.0233376
0.0238427
0.0243054
0.0247448
0.0251647
0.0255626
0.0259388
0.0262889
0.0265967
0.026862
0.0270826
0.0272573
0.027392
0.0274919
0.0275562
0.0276025
0.0276383
0.0276654
0.0276863
0.027696
0.0276744
0.0276187
0.0275311
0.0274171
0.027286
0.0271421
0.026978
0.0267945
0.0265913
0.0263682
0.0261275
0.0258712
0.0255965
0.0253121
0.0250262
0.0247466
0.0244794
0.0242224
0.0239572
0.0236692
0.0233548
0.0230172
0.0226635
0.0223015
0.02194
0.021591
0.0212584
0.0209396
0.0206296
0.0203217
0.0200078
0.0196855
0.019355
0.0190181
0.0186778
0.0183358
0.0179919
0.0176449
0.0172895
0.016919
0.0165289
0.0161198
0.0156994
0.0152793
0.0148675
0.0144698
0.0140892
0.0137214
0.0133497
0.0129572
0.012539
0.0120982
0.0116416
0.0111782
0.0107193
0.0102758
0.00985183
0.00944601
0.00905353
0.00866793
0.00828002
0.00788169
0.00747382
0.0070628
0.00665583
0.00625763
0.00586911
0.00548642
0.00510461
0.00471774
0.00432094
0.00391461
0.00350596
0.00309983
0.00270482
0.00233137
0.00198601
0.00166729
0.00136126
0.00104804
0.000720719
0.000379822
2.91269e-05
-0.000322923
0.00104804
0.000720719
0.000379822
2.91269e-05
-0.000322923
-0.000659545
-0.000967615
-0.00124182
-0.00148359
-0.00170023
-0.00190071
-0.00209386
-0.00229108
-0.00249715
-0.00271216
-0.00293393
-0.00315695
-0.00336889
-0.00356201
-0.0037397
-0.00391223
-0.00409104
-0.00428185
-0.00448156
-0.00468795
-0.00489595
-0.00509754
-0.00528581
-0.00545959
-0.00562925
-0.00581214
-0.0060133
-0.00623029
-0.0064577
-0.00668717
-0.00690767
-0.00711356
-0.00729599
-0.00744593
-0.00755967
-0.00764083
-0.00770263
-0.00776181
-0.00782248
-0.00788264
-0.00793966
-0.00798801
-0.00801779
-0.00803202
-0.00803288
-0.00802258
-0.00800515
-0.00798093
-0.00794296
-0.00789176
-0.00782332
-0.00773153
-0.00761332
-0.00746934
-0.00730685
-0.00714563
-0.00698888
-0.00683071
-0.00666532
-0.00648523
-0.0062808
-0.00605809
-0.00581501
-0.00554584
-0.0052484
-0.00492143
-0.00456138
-0.00417248
-0.00375411
-0.00330553
-0.00283024
-0.00233081
-0.00180385
-0.00125803
-0.00070154
-0.000142354
0.000411489
0.000960973
0.00152655
0.0021235
0.00275063
0.00339709
0.00404897
0.0046971
0.00534452
0.00599718
0.00665064
0.00729586
0.00792504
0.0085352
0.00913099
0.00971744
0.0102902
0.010842
0.0113684
0.0118693
0.0123512
0.0128304
0.0133116
0.0137933
0.0142736
0.0147467
0.0151999
0.0156309
0.0160376
0.0164187
0.0167765
0.0171138
0.0174318
0.0177382
0.0180333
0.0183139
0.0185789
0.018827
0.0190565
0.0192812
0.0195053
0.0197278
0.0199474
0.0201589
0.0203501
0.0205208
0.0206658
0.020778
0.0208555
0.0208997
0.0209173
0.0209268
0.0209306
0.0209225
0.0208976
0.0208499
0.0207705
0.0206686
0.0205461
0.0204016
0.0202371
0.0200511
0.0198316
0.0195758
0.0192834
0.0189578
0.0186068
0.0182358
0.0178401
0.0174222
0.016991
0.0165588
0.016138
0.0157308
0.0153203
0.0148963
0.0144623
0.0140274
0.0136013
0.013188
0.0127808
0.0123691
0.011953
0.011537
0.011126
0.0107243
0.0103371
0.00996701
0.00961653
0.00928616
0.00897375
0.00867624
0.00839164
0.00811578
0.00784638
0.00758158
0.00731878
0.00705779
0.00680273
0.00654998
0.00629603
0.00603841
0.00577531
0.00550871
0.00524852
0.00500482
0.00478004
0.00457142
0.00437373
0.00418125
0.00398738
0.00378358
0.00356721
0.00333997
0.00310522
0.00286744
0.00263101
0.0023937
0.00215547
0.00191804
0.00168314
0.00145262
0.00122728
0.00100644
0.000796549
0.000606805
0.000443248
0.000305629
0.000182928
5.50882e-05
-8.25369e-05
-0.000226014
-0.000369862
-0.00050581
-0.000619278
-0.000702135
-0.000751543
-0.000769942
-0.000764684
-0.000742687
-0.000707221
-0.000666011
-0.000621623
-0.000573685
-0.000521992
-0.000464109
-0.000391861
-0.000305333
-0.000210751
-0.000117542
-3.46585e-05
3.62888e-05
0.000105682
0.000181858
0.000271089
0.00037863
0.000506372
0.000651055
0.000802252
0.000946263
0.00107571
0.00118755
0.0012824
0.00136639
0.00145516
0.0020262
0.00220356
0.00237806
0.00254341
0.00269561
0.00283323
0.00295777
0.00307325
0.00318945
0.00331914
0.00345907
0.00359649
0.00371849
0.00381771
0.0038961
0.00396361
0.00402343
0.0040766
0.0041249
0.00416658
0.00419304
0.00420098
0.0041847
0.00413861
0.00406187
0.00395777
0.00383336
0.00370317
0.00357536
0.00345461
0.00334382
0.00323824
0.00311998
0.00297963
0.00281488
0.00262801
0.00242504
0.00221172
0.00199138
0.00177064
0.00155067
0.00132907
0.0011032
0.000870229
0.000627966
0.000382988
0.000137933
-0.000106788
-0.000350644
-0.000596039
-0.000851583
-0.00112308
-0.00141432
-0.00172703
-0.00206004
-0.00240978
-0.00277414
-0.00315461
-0.00354497
-0.00393358
-0.00430909
-0.00466741
-0.00501945
-0.00537836
-0.00573861
-0.00608575
-0.00640683
-0.00669656
-0.00696376
-0.00722773
-0.00748828
-0.00773607
-0.0079637
-0.00816471
-0.00833266
-0.00847396
-0.00858849
-0.00867474
-0.00873494
-0.00876927
-0.00876915
-0.00873477
-0.00866817
-0.00857455
-0.00846277
-0.00833762
-0.00819461
-0.00804298
-0.00788842
-0.00773349
-0.00758079
-0.00742734
-0.00725995
-0.00707642
-0.00687737
-0.0066648
-0.00644244
-0.00621179
-0.00596918
-0.00571517
-0.0054479
-0.00516479
-0.0048656
-0.00455163
-0.00422786
-0.00391145
-0.00360608
-0.00330679
-0.00300738
-0.00269983
-0.00237275
-0.00202295
-0.00164656
-0.00124113
-0.000808496
-0.000352249
0.000123755
0.000610511
0.00110689
0.0016151
0.00213585
0.00267086
0.00322653
0.00379941
0.00438257
0.00496702
0.00554395
0.00611266
0.00668976
0.00729279
0.00792445
0.00857828
0.00924399
0.00991176
0.0105767
0.0112375
0.0118848
0.0125065
0.0130949
0.013651
0.0141912
0.0147399
0.0152962
0.0158459
0.0163751
0.0168736
0.0173367
0.017776
0.0181924
0.0185835
0.0189504
0.0192919
0.0195997
0.0198774
0.0201221
0.0203294
0.0205002
0.0206365
0.0207377
0.0208191
0.0208902
0.0209575
0.0210273
0.0210962
0.0211413
0.0211526
0.0211285
0.0210732
0.0209959
0.0209038
0.0207989
0.0206916
0.020585
0.0204773
0.0203664
0.020248
0.0201135
0.0199654
0.0198072
0.019643
0.0194776
0.0193113
0.019136
0.0189476
0.0187412
0.0185122
0.0182597
0.0179863
0.0177004
0.017419
0.0171482
0.0168873
0.0166334
0.0163794
0.0161103
0.0158185
0.0155004
0.0151556
0.0147883
0.0144036
0.0140068
0.0136061
0.0132028
0.0127945
0.0123794
0.0119549
0.0115144
0.0110576
0.0105911
0.0101257
0.00967186
0.00923178
0.0087921
0.00833748
0.00786417
0.00737496
0.00687556
0.00637331
0.00587748
0.00539782
0.00494153
0.00451235
0.00410938
0.00372672
0.00335149
0.00296909
0.00257548
0.00217266
0.00176465
0.00135776
0.000962661
0.000584131
0.000220531
-0.000134117
-0.000487289
-0.000842965
-0.00119901
-0.00155407
-0.00190373
-0.00224165
-0.00256341
-0.0028691
-0.00316621
-0.00346878
-0.00378348
-0.00411237
-0.00514755
-0.00547272
-0.00577303
-0.00604518
-0.00629077
-0.00651601
-0.00673367
-0.00696003
-0.00719903
-0.00744719
-0.00769891
-0.00794675
-0.00818088
-0.0084002
-0.00860527
-0.00879838
-0.00898388
-0.00916395
-0.00933692
-0.00950528
-0.0096643
-0.0098055
-0.00992296
-0.0100156
-0.0100907
-0.0101664
-0.0102482
-0.010335
-0.0104242
-0.010509
-0.0105752
-0.0106185
-0.0106333
-0.0106149
-0.0105636
-0.0104832
-0.0103787
-0.0102596
-0.01013
-0.0099922
-0.00984931
-0.0097
-0.00953493
-0.00935669
-0.00916947
-0.00897813
-0.00878833
-0.00860013
-0.00840374
-0.00819695
-0.00797668
-0.00773911
-0.00748262
-0.00720805
-0.0069205
-0.00663279
-0.00634592
-0.00605471
-0.00575461
-0.00544103
-0.00511069
-0.00477374
-0.00442982
-0.00407292
-0.00369869
-0.0033029
-0.00287837
-0.00242397
-0.00193874
-0.00142432
-0.00088638
-0.000329381
0.000248712
0.000843568
0.00144909
0.0020579
0.00266214
0.00326098
0.00386826
0.00449199
0.0051277
0.00576485
0.00639277
0.00700723
0.00761734
0.00823654
0.00886533
0.00949749
0.010126
0.0107446
0.0113478
0.0119326
0.0124943
0.0130292
0.0135376
0.014023
0.0144925
0.0149596
0.0154273
0.0158928
0.0163534
0.0168045
0.0172373
0.0176532
0.0180551
0.0184464
0.0188325
0.0192143
0.0195839
0.0199372
0.0202714
0.0205849
0.0208796
0.0211587
0.021428
0.0217045
0.0219933
0.0222925
0.0225976
0.0229011
0.023191
0.0234673
0.0237247
0.0239562
0.0241586
0.024333
0.0244862
0.0246342
0.0247756
0.0249003
0.0250005
0.0250706
0.0251076
0.025124
0.0251245
0.0251108
0.0250862
0.0250484
0.0249815
0.0248784
0.0247371
0.0245599
0.0243549
0.0241289
0.023883
0.0236272
0.0233697
0.0231169
0.0228742
0.0226389
0.0223936
0.0221297
0.0218487
0.0215575
0.0212642
0.0209736
0.0206818
0.0203834
0.0200771
0.0197634
0.0194445
0.0191229
0.0188042
0.0184981
0.01821
0.0179412
0.0176901
0.0174511
0.0172142
0.0169715
0.0167173
0.0164473
0.0161595
0.0158568
0.0155495
0.015246
0.0149456
0.0146428
0.0143325
0.0140116
0.0136804
0.0133445
0.0130081
0.0126751
0.0123483
0.0120261
0.0116961
0.0113423
0.0109621
0.0105617
0.0101506
0.00973789
0.00932958
0.00892906
0.00854271
0.00817717
0.00783584
0.0075168
0.00721036
0.0069064
0.00660562
0.00631324
0.0060335
0.00576928
0.00552257
0.00528699
0.00505702
0.00482725
0.00459253
0.00435387
0.00412481
0.00391764
0.00373623
0.00357874
0.00343936
0.00331089
0.00318455
0.00304685
0.00289168
0.00271866
0.00253059
0.0023343
0.00214255
0.00196306
0.00179755
0.00164406
0.0014986
0.00135711
0.00121321
0.00105748
0.000894936
0.000739043
0.000602256
0.000490173
0.000397738
0.000312055
0.000227121
0.000139943
4.8745e-05
-4.28511e-05
-0.000121812
-0.000178298
-0.000204409
-0.000195351
-0.00015264
-8.29298e-05
-8.29298e-05
3.26277e-06
9.09815e-05
0.000169102
0.000229436
0.000267991
0.000290356
0.000319349
0.000376142
0.000463817
0.000574115
0.000693963
0.000811286
0.00091768
0.0010071
0.00107624
0.00112591
0.00116072
0.00118628
0.00120832
0.00123271
0.0012578
0.00127746
0.00128575
0.00127949
0.00125826
0.0012252
0.00118703
0.00115343
0.00113342
0.00112831
0.00112678
0.00111983
0.00110251
0.00107139
0.00102543
0.000967724
0.000908179
0.000858727
0.000823358
0.000801134
0.000788678
0.000780395
0.000767248
0.000742123
0.00070205
0.000647238
0.000580425
0.000505853
0.000425565
0.000334083
0.000234176
0.000133929
4.13168e-05
-3.93172e-05
-0.000111796
-0.000184202
-0.000249324
-0.000292724
-0.000302786
-0.000276193
-0.000222134
-0.000156936
-8.3684e-05
-2.59621e-07
9.40469e-05
0.000203063
0.000338811
0.000503276
0.000694025
0.000904808
0.00112662
0.00135588
0.00160367
0.00187894
0.00217927
0.0024951
0.00281473
0.003131
0.00344551
0.00375427
0.00405172
0.00433379
0.00459847
0.00484839
0.00509224
0.00533496
0.00557759
0.00582022
0.00606296
0.00630543
0.00654604
0.00678662
0.00703111
0.00728391
0.00754811
0.00782258
0.00809759
0.00835906
0.00860404
0.00883656
0.00906272
0.00928948
0.00952536
0.00977701
0.0100477
0.0103375
0.0106434
0.0109609
0.0112864
0.0116189
0.0119571
0.0122989
0.0126417
0.0129843
0.0133296
0.0136781
0.0140235
0.0143566
0.0146702
0.0149639
0.0152499
0.0155466
0.0158573
0.016177
0.0164986
0.0168138
0.0171127
0.0173915
0.0176458
0.0178724
0.0180726
0.0182498
0.0184105
0.0185662
0.0187177
0.0188606
0.0189912
0.0191059
0.019199
0.0192762
0.0193428
0.0194043
0.0194664
0.0195289
0.0195786
0.0196056
0.0196061
0.0195801
0.0195322
0.0194685
0.0193968
0.0193317
0.0192805
0.0192447
0.0192231
0.019209
0.0191878
0.0191528
0.0191012
0.0190323
0.0189485
0.0188533
0.0187515
0.0186497
0.0185455
0.0184317
0.0183025
0.0181551
0.0179931
0.01783
0.0176708
0.0175154
0.0173628
0.0172081
0.0170383
0.0168468
0.016628
0.0163787
0.0161002
0.0157972
0.0154767
0.0151497
0.0148209
0.0144919
0.0141638
0.0138338
0.0134905
0.0131305
0.0127574
0.0123786
0.0120029
0.0116331
0.0112598
0.0108713
0.0104664
0.01005
0.00962884
0.00920926
0.00879602
0.00839432
0.00801024
0.00764858
0.00731075
0.0069934
0.00668794
0.00638701
0.00608702
0.00578547
0.0054803
0.00517278
0.00487007
0.00457327
0.00427921
0.00398292
0.00367972
0.00336911
0.00305837
0.00275561
0.00246428
0.00218502
0.00191674
0.00165567
0.0013931
0.00111837
0.000828429
0.000525357
0.000213226
-0.000102629
-0.000417081
-0.000730719
-0.00104162
-0.00134637
-0.00164246
-0.00192888
-0.00220522
-0.00246866
-0.00271653
-0.00294789
-0.00316412
-0.00336859
-0.00356609
-0.00376338
-0.00396636
-0.00418013
-0.00440826
-0.00376338
-0.00396636
-0.00418013
-0.00440826
-0.00464881
-0.00489021
-0.00512293
-0.00534683
-0.00556658
-0.00578748
-0.00601341
-0.00624552
-0.00648143
-0.00671926
-0.00695718
-0.00719335
-0.00742853
-0.00767122
-0.0079355
-0.00822259
-0.00852508
-0.00883317
-0.00913839
-0.00943784
-0.00973442
-0.0100209
-0.0102855
-0.0105199
-0.0107226
-0.0109021
-0.0110701
-0.011226
-0.0113644
-0.0114823
-0.0115778
-0.0116489
-0.0117064
-0.0117548
-0.0117959
-0.0118323
-0.0118615
-0.0118699
-0.011854
-0.0118124
-0.0117458
-0.0116583
-0.0115532
-0.0114323
-0.0113079
-0.0111813
-0.0110469
-0.0109004
-0.0107372
-0.0105545
-0.0103678
-0.0101778
-0.00997667
-0.00975779
-0.00951436
-0.00923729
-0.00892792
-0.00858188
-0.00819463
-0.00776759
-0.00730423
-0.00680725
-0.0062922
-0.00576579
-0.00523065
-0.00469027
-0.00414113
-0.00356476
-0.00295681
-0.00232122
-0.00166695
-0.00100565
-0.000341989
0.000334708
0.00103077
0.00174695
0.00248078
0.00322715
0.00398164
0.00474308
0.00550415
0.00625689
0.00699441
0.00771244
0.00841396
0.00911631
0.00983922
0.0105844
0.0113431
0.012104
0.0128574
0.0135989
0.0143338
0.0150584
0.0157653
0.0164495
0.0171096
0.0177482
0.0183727
0.0189792
0.0195599
0.0201107
0.0206306
0.0211234
0.0216069
0.0220877
0.0225663
0.0230432
0.0235126
0.0239582
0.0243785
0.0247694
0.0251261
0.0254492
0.0257411
0.0260067
0.0262643
0.0265146
0.0267494
0.0269624
0.0271476
0.0272978
0.027425
0.0275328
0.0276212
0.0276927
0.0277451
0.0277634
0.0277424
0.0276804
0.0275802
0.02745
0.0272965
0.0271183
0.0269249
0.0267253
0.0265284
0.026342
0.0261643
0.0259767
0.0257718
0.0255507
0.0253183
0.0250814
0.0248437
0.0246026
0.024357
0.0241056
0.0238463
0.023578
0.0233014
0.0230209
0.022748
0.0224864
0.0222345
0.0219895
0.0217457
0.0214939
0.021229
0.020947
0.0206454
0.0203246
0.0199877
0.0196391
0.0192823
0.0189183
0.0185481
0.0181735
0.0177953
0.017411
0.0170235
0.0166384
0.0162618
0.0158989
0.0155485
0.0151978
0.014831
0.0144456
0.0140465
0.013641
0.0132368
0.0128419
0.0124614
0.0120983
0.0117531
0.0114235
0.0111061
0.0107972
0.0104942
0.0101978
0.00990919
0.00962883
0.00935638
0.00909047
0.00882173
0.00854474
0.00825729
0.007959
0.00765414
0.00735487
0.00707152
0.0068097
0.00657138
0.0063547
0.00615412
0.00595852
0.00575384
0.00553693
0.00531121
0.00508179
0.00485507
0.00463946
0.00443648
0.00424481
0.00406104
0.0038806
0.00370159
0.00352721
0.00336019
0.00320528
0.00306769
0.00294986
0.00285
0.00276041
0.00266704
0.0025624
0.0024433
0.00230938
0.00216641
0.0020311
0.00191861
0.00183378
0.00177439
0.00173375
0.00170331
0.00167374
0.00163677
0.00158834
0.00152765
0.00145626
0.00137835
0.00130239
0.00163677
0.00158834
0.00152765
0.00145626
0.00137835
0.00130239
0.00123399
0.00117015
0.00110324
0.00102585
0.000934834
0.000833197
0.000726835
0.000621869
0.000525084
0.000441757
0.000370857
0.000300132
0.000215825
0.000112594
-9.654e-06
-0.000147605
-0.00029463
-0.000439453
-0.000570618
-0.000682235
-0.000772789
-0.000844513
-0.000903466
-0.000959404
-0.00101805
-0.00108281
[truncated: 32,440 more rows]

## Sheet: A_NFrmsPerTrialBlk
2460

## Sheet: B_RegressionSlopesLoRewrd
4.97035e-06
7.61353e-06
-1.22827e-06
-3.02872e-05
9.88836e-06
-2.3151e-05
-0.000159087
-3.07537e-05
-9.05176e-05
-0.000151956
-8.04757e-05
5.90156e-06
-4.28715e-06
-4.77967e-05

## Sheet: B_RegressionSlopesHiRewrd
4.04596e-05
1.16202e-05
5.07528e-05
2.59166e-05
9.43644e-05
2.72044e-05
6.09961e-05
9.70549e-05
8.5244e-05
0.000108395
1.62347e-05
4.34932e-05
6.14996e-05
6.27261e-05

## Sheet: C_CorrectSpike1_LoReward
44.9999
15
0
15
29.9999
29.9999
74.9998
15
44.9999
29.9999
59.9999
44.9999
44.9999
44.9999
59.9999
29.9999
29.9999
15
44.9999
59.9999
29.9999
44.9999
0
29.9999
44.9999
29.9999
59.9999
29.9999
0
59.9999
44.9999
59.9999
29.9999
29.9999
15
74.9998
89.9998
59.9999
44.9999
74.9998
29.9999
59.9999
44.9999
44.9999
29.9999
44.9999
44.9999
29.9999
15
44.9999
44.9999
59.9999
74.9998
15
0
0
15
0
15
44.9999
29.9999
29.9999
44.9999
0
0
15
0
15
44.9999
15
0
29.9999
44.9999
44.9999
29.9999
0
15
15
29.9999
15
44.9999
44.9999
29.9999
89.9998
195
89.9998
29.9999
29.9999
15
29.9999
44.9999
0
0
29.9999
44.9999
89.9998
15
15
59.9999
29.9999
0
29.9999
15
29.9999
44.9999
0
15
15
0
59.9999
29.9999
15
44.9999
59.9999
29.9999
44.9999
15
44.9999
74.9998
44.9999
44.9999
74.9998
29.9999
0
59.9999
29.9999
44.9999
29.9999
44.9999
0
44.9999
0
15
29.9999
29.9999
89.9998
59.9999
59.9999
89.9998
29.9999
29.9999
29.9999
0
44.9999
74.9998
29.9999
29.9999
59.9999
29.9999
44.9999
15
59.9999
29.9999
0
15
15
0
44.9999
29.9999
44.9999
74.9998
74.9998
59.9999
59.9999
44.9999
29.9999
15
59.9999
59.9999
44.9999
29.9999
29.9999
29.9999
59.9999
44.9999
15
29.9999
44.9999
44.9999
89.9998
89.9998
15
44.9999
0
0
15
0
59.9999
89.9998
15
15
15
44.9999
135
59.9999
59.9999
44.9999
29.9999
74.9998
59.9999
44.9999
0
15
44.9999
74.9998
59.9999
59.9999
44.9999
44.9999
44.9999
15
15
74.9998
59.9999
29.9999
59.9999
29.9999
0
15
44.9999
29.9999
0
59.9999
15
15
29.9999
15
44.9999
15
0
15
15
0
0
0
15
15
0
0
0
15
0
15
15
0
0
15
0
0
0
29.9999
15
0
0
0
29.9999
0
44.9999
15
15
29.9999
59.9999
15
15
15
29.9999
44.9999
15
44.9999
15
29.9999
59.9999
29.9999
44.9999
15
44.9999
15
15
59.9999
44.9999
29.9999
15
59.9999
44.9999
89.9998
29.9999
44.9999
59.9999
44.9999
29.9999
59.9999
59.9999
74.9998
59.9999
29.9999
74.9998
105
89.9998
44.9999
29.9999
74.9998
74.9998
105
44.9999
15
59.9999
59.9999
29.9999
120
44.9999
44.9999
74.9998
59.9999
29.9999
29.9999
59.9999
120
44.9999
15
59.9999
74.9998
29.9999
44.9999
105
105
105
74.9998
15
29.9999
89.9998
89.9998
44.9999
15
44.9999
59.9999
44.9999
74.9998
120
44.9999
29.9999
59.9999
59.9999
59.9999
59.9999
44.9999
15
29.9999
89.9998
29.9999
105
29.9999
15
44.9999
15
44.9999
29.9999
59.9999
29.9999
0
74.9998
29.9999
74.9998
44.9999
44.9999
74.9998
29.9999
44.9999
74.9998
44.9999
0
44.9999
29.9999
29.9999
74.9998
29.9999
74.9998
59.9999
105
0
0
29.9999
59.9999
74.9998
89.9998
29.9999
0
44.9999
74.9998
74.9998
59.9999
44.9999
44.9999
15
44.9999
29.9999
44.9999
29.9999
0
59.9999
44.9999
15
0
44.9999
0
44.9999
0
29.9999
0
15
0
0
15
15
44.9999
29.9999
15
29.9999
0
44.9999
29.9999
29.9999
15
0
0
15
0
29.9999
29.9999
44.9999
0
0
0
44.9999
15
0
29.9999
0
15
0
0
15
29.9999
59.9999
44.9999
29.9999
29.9999
15
0
29.9999
0
59.9999
15
15
44.9999
0
29.9999
29.9999
0
59.9999
44.9999
15
74.9998
29.9999
59.9999
44.9999
150
74.9998
89.9998
59.9999
15
15
74.9998
0
29.9999
180
105
59.9999
15
44.9999
120
0
59.9999
150
15
0
44.9999
105
74.9998
105
59.9999
59.9999
59.9999
59.9999
74.9998
74.9998
44.9999
29.9999
59.9999
44.9999
89.9998
120
29.9999
74.9998
44.9999
59.9999
44.9999
59.9999
74.9998
74.9998
29.9999
15
74.9998
59.9999
44.9999
15
59.9999
89.9998
59.9999
74.9998
0
0
15
44.9999
29.9999
29.9999
15
29.9999
44.9999
59.9999
44.9999
105
105
74.9998
44.9999
15
89.9998
15
15
15
29.9999
29.9999
15
44.9999
0
15
29.9999
15
15
29.9999
0
0
59.9999
44.9999
0
15
15
29.9999
0
0
0
44.9999
15
15
0
0
15
29.9999
29.9999
15
29.9999
0
0
44.9999
15
0
29.9999
29.9999
0
44.9999
15
44.9999
15
0
44.9999
0
0
29.9999
15
15
29.9999
0
29.9999
0
44.9999
0
44.9999
0
15
0
44.9999
15
15
29.9999
44.9999
44.9999
29.9999
59.9999
59.9999
74.9998
44.9999
44.9999
59.9999
0
59.9999
29.9999
15
89.9998
44.9999
44.9999
15
44.9999
44.9999
44.9999
29.9999
29.9999
105
15
15
105
74.9998
59.9999
74.9998
59.9999
89.9998
44.9999
59.9999
74.9998
135
59.9999
89.9998
120
120
59.9999
15
44.9999
105
105
105
105
105
89.9998
44.9999
120
74.9998
89.9998
74.9998
44.9999
59.9999
74.9998
44.9999
44.9999
105
44.9999
29.9999
15
59.9999
59.9999
59.9999
59.9999
59.9999
74.9998
59.9999
29.9999
74.9998
15
59.9999
59.9999
29.9999
29.9999
89.9998
59.9999
44.9999
15
44.9999
44.9999
29.9999
29.9999
0
44.9999
89.9998
59.9999
89.9998
89.9998
59.9999
29.9999
29.9999
105
44.9999
15
15
15
29.9999
29.9999
59.9999
15
44.9999
29.9999
15
15
0
29.9999
59.9999
15
0
44.9999
15
29.9999
15
0
29.9999
0
74.9998
15
15
15
15
15
0
0
74.9998
29.9999
15
59.9999
0
15
15
0
15
74.9998
29.9999
29.9999
59.9999
15
59.9999
29.9999
59.9999
15
74.9998
44.9999
59.9999
59.9999
44.9999
105
74.9998
74.9998
59.9999
105
59.9999
44.9999
59.9999
15
44.9999
44.9999
59.9999
59.9999
29.9999
44.9999
59.9999
29.9999
74.9998
29.9999
105
59.9999
180
44.9999
74.9998
74.9998
15
44.9999
74.9998
59.9999
89.9998
59.9999
105
15
29.9999
44.9999
44.9999
0
59.9999
74.9998
29.9999
59.9999
74.9998
44.9999
105
89.9998
29.9999
15
89.9998
59.9999
29.9999
89.9998
59.9999
74.9998
89.9998
59.9999
74.9998
29.9999
29.9999
44.9999
44.9999
15
44.9999
44.9999
59.9999
29.9999
74.9998
44.9999
29.9999
15
0
44.9999
29.9999
0
15
15
59.9999
29.9999
44.9999
15
44.9999
15
15
29.9999
15
15
0
59.9999
0
29.9999
15
44.9999
29.9999
0
15
29.9999
29.9999
15
15
0
29.9999
15
44.9999
0
0
44.9999
29.9999
15
15
15
29.9999
29.9999
15
0
44.9999
15
59.9999
0
29.9999
44.9999
0
29.9999
0
15
29.9999
59.9999
59.9999
0
44.9999
29.9999
15
74.9998
15
15
29.9999
15
44.9999
15
15
74.9998
15
29.9999
44.9999
44.9999
135
44.9999
0
74.9998
59.9999
15
29.9999
29.9999
44.9999
15
15
44.9999
59.9999
59.9999
15
74.9998
44.9999
15
120
44.9999
59.9999
89.9998
89.9998
44.9999
44.9999
74.9998
120
74.9998
29.9999
15
44.9999
59.9999
89.9998
29.9999
15
0
29.9999
59.9999
29.9999
44.9999
29.9999
15
15
59.9999
29.9999
59.9999
59.9999
0
74.9998
74.9998
15
74.9998
59.9999
44.9999
15
44.9999
74.9998
105
44.9999
44.9999
29.9999
89.9998
74.9998
74.9998
89.9998
59.9999
15
29.9999
89.9998
105
44.9999
15
15
29.9999
0
44.9999
29.9999
29.9999
44.9999
29.9999
59.9999
15
44.9999
44.9999
44.9999
15
29.9999
15
15
15
29.9999
15
15
0
59.9999
44.9999
0
29.9999
29.9999
15
15
29.9999
29.9999
29.9999
15
44.9999
15
44.9999
29.9999
15
29.9999
44.9999
15
29.9999
44.9999
59.9999
15
29.9999
15
29.9999
44.9999
0
29.9999
29.9999
15
15
44.9999
29.9999
59.9999
15
15
44.9999
15
44.9999
44.9999
15
29.9999
44.9999
29.9999
15
74.9998
29.9999
29.9999
59.9999
29.9999
29.9999
59.9999
44.9999
74.9998
15
59.9999
44.9999
44.9999
59.9999
15
15
29.9999
15
15
29.9999
44.9999
29.9999
15
74.9998
15
29.9999
44.9999
59.9999
59.9999
0
29.9999
44.9999
44.9999
15
59.9999
74.9998
44.9999
120
105
15
29.9999
29.9999
29.9999
89.9998
44.9999
29.9999
74.9998
15
44.9999
44.9999
59.9999
44.9999
44.9999
0
44.9999
15
74.9998
74.9998
29.9999
74.9998
59.9999
59.9999
44.9999
59.9999
74.9998
44.9999
15
59.9999
29.9999
44.9999
59.9999
74.9998
74.9998
59.9999
74.9998
59.9999
59.9999
29.9999
59.9999
29.9999
105
44.9999
105
89.9998
59.9999
29.9999
89.9998
44.9999
74.9998
120
74.9998
120
44.9999
15
59.9999
74.9998
74.9998
44.9999
59.9999
105
74.9998
59.9999
74.9998
15
74.9998
15
29.9999
29.9999
29.9999
29.9999
0
105
0
269.999
180
89.9998
120
0
44.9999
0
15
29.9999
74.9998
15
29.9999
0
59.9999
59.9999
29.9999
44.9999
29.9999
29.9999
15
0
0
29.9999
0
15
29.9999
29.9999
15
0
15
15
0
29.9999
44.9999
29.9999
44.9999
29.9999
15
15
59.9999
74.9998
59.9999
15
74.9998
44.9999
15
0
15
15
44.9999
0
44.9999
0
59.9999
15
59.9999
15
59.9999
29.9999
59.9999
74.9998
29.9999
29.9999
59.9999
89.9998
15
15
15
15
74.9998
59.9999
15
89.9998
29.9999
59.9999
29.9999
74.9998
89.9998
74.9998
44.9999
29.9999
29.9999
74.9998
15
44.9999
44.9999
59.9999
15
29.9999
44.9999
44.9999
29.9999
44.9999
89.9998
89.9998
74.9998
59.9999
59.9999
89.9998
44.9999
44.9999
89.9998
135
150
59.9999
44.9999
29.9999
15
15
89.9998
29.9999
44.9999
59.9999
44.9999
150
15
74.9998
44.9999
89.9998
59.9999
15
105
15
59.9999
0
29.9999
44.9999
44.9999
59.9999
74.9998
74.9998
59.9999
59.9999
15
59.9999
89.9998
15
59.9999
105
29.9999
29.9999
59.9999
59.9999
59.9999
0
15
29.9999
44.9999
59.9999
44.9999
15
29.9999
59.9999
44.9999
44.9999
15
0
29.9999
29.9999
29.9999
29.9999
15
15
74.9998
29.9999
29.9999
44.9999
0
0
29.9999
0
44.9999
74.9998
29.9999
44.9999
29.9999
29.9999
29.9999
15
74.9998
59.9999
29.9999
29.9999
0
44.9999
44.9999
29.9999
59.9999
44.9999
0
74.9998
59.9999
15
15
29.9999
15
29.9999
15
15
15
15
15
0
59.9999
59.9999
74.9998
29.9999
15
74.9998
15
29.9999
15
29.9999
135
44.9999
29.9999
59.9999
15
44.9999
29.9999
0
29.9999
74.9998
29.9999
29.9999
59.9999
29.9999
44.9999
120
44.9999
44.9999
29.9999
44.9999
44.9999
29.9999
44.9999
29.9999
0
59.9999
74.9998
59.9999
44.9999
0
59.9999
105
89.9998
15
44.9999
44.9999
89.9998
44.9999
44.9999
15
29.9999
74.9998
74.9998
29.9999
89.9998
105
59.9999
59.9999
15
59.9999
59.9999
74.9998
59.9999
74.9998
44.9999
44.9999
59.9999
15
74.9998
89.9998
59.9999
44.9999
59.9999
105
74.9998
105
74.9998
74.9998
120
105
44.9999
59.9999
0
105
89.9998
105
29.9999
74.9998
15
29.9999
15
29.9999
15
44.9999
15
105
105
44.9999
44.9999
89.9998
29.9999
0
15
15
59.9999
0
0
0
59.9999
44.9999
0
44.9999
15
29.9999
0
59.9999
44.9999
15
15
15
0
15
15
0
44.9999
44.9999
29.9999
15
29.9999
15
0
29.9999
59.9999
44.9999
29.9999
44.9999
44.9999
29.9999
59.9999
15
74.9998
59.9999
29.9999
29.9999
29.9999
59.9999
29.9999
44.9999
44.9999
59.9999
74.9998
89.9998
59.9999
44.9999
44.9999
44.9999
44.9999
74.9998
29.9999
89.9998
15
15
59.9999
29.9999
15
0
29.9999
29.9999
44.9999
29.9999
29.9999
44.9999
15
44.9999
44.9999
44.9999
44.9999
15
29.9999
29.9999
15
44.9999
15
74.9998
29.9999
29.9999
15
59.9999
44.9999
59.9999
29.9999
15
29.9999
74.9998
59.9999
44.9999
44.9999
74.9998
0
0
44.9999
0
59.9999
15
29.9999
44.9999
44.9999
44.9999
29.9999
15
0
29.9999
0
0
15
59.9999
15
15
15
29.9999
15
29.9999
29.9999
15
0
15
44.9999
15
29.9999
15
0
15
29.9999
29.9999
15
59.9999
15
74.9998
29.9999
0
15
15
29.9999
44.9999
59.9999
0
15
29.9999
44.9999
59.9999
15
15
29.9999
15
15
29.9999
44.9999
29.9999
44.9999
15
44.9999
15
44.9999
29.9999
15
89.9998
29.9999
59.9999
74.9998
15
15
44.9999
29.9999
0
89.9998
0
29.9999
29.9999
15
120
44.9999
59.9999
29.9999
15
15
15
29.9999
15
15
44.9999
29.9999
29.9999
74.9998
150
59.9999
29.9999
120
89.9998
29.9999
44.9999
105
29.9999
44.9999
44.9999
105
74.9998
74.9998
29.9999
89.9998
15
44.9999
74.9998
44.9999
105
74.9998
165
105
44.9999
0
59.9999
89.9998
89.9998
15
44.9999
44.9999
29.9999
0
89.9998
105
89.9998
59.9999
89.9998
59.9999
74.9998
44.9999
15
44.9999
59.9999
15
15
29.9999
44.9999
59.9999
29.9999
44.9999
29.9999
44.9999
59.9999
29.9999
105
29.9999
15
44.9999
59.9999
59.9999
74.9998
74.9998
29.9999
59.9999
29.9999
74.9998
0
15
29.9999
89.9998
74.9998
29.9999
0
105
120
15
120
15
29.9999
15
15
44.9999
29.9999
44.9999
29.9999
74.9998
74.9998
15
29.9999
0
15
0
59.9999
44.9999
29.9999
15
29.9999
29.9999
44.9999
29.9999
0
29.9999
0
15
44.9999
29.9999
59.9999
29.9999
44.9999
0
15
15
29.9999
0
44.9999
0
15
15
44.9999
15
29.9999
44.9999
15
0
105
59.9999
29.9999
15
44.9999
29.9999
29.9999
0
59.9999
15
0
29.9999
15
59.9999
29.9999
44.9999
29.9999
15
44.9999
59.9999
29.9999
15
29.9999
29.9999
29.9999
29.9999
59.9999
44.9999
15
44.9999
59.9999
15
15
44.9999
44.9999
74.9998
59.9999
29.9999
44.9999
15
44.9999
29.9999
74.9998
44.9999
105
59.9999
44.9999
89.9998
29.9999
59.9999
59.9999
59.9999
44.9999
0
74.9998
29.9999
44.9999
44.9999
0
89.9998
89.9998
29.9999
15
44.9999
15
29.9999
59.9999
59.9999
29.9999
29.9999
29.9999
29.9999
15
15
59.9999
44.9999
59.9999
44.9999
29.9999
74.9998
59.9999
74.9998
59.9999
44.9999
74.9998
89.9998
29.9999
89.9998
29.9999
29.9999
29.9999
44.9999
0
0
29.9999
44.9999
59.9999
44.9999
105
74.9998
89.9998
44.9999
44.9999
29.9999
15
44.9999
59.9999
59.9999
89.9998
74.9998
29.9999
59.9999
29.9999
74.9998
135
44.9999
29.9999
74.9998
105
89.9998
15
15
74.9998
59.9999
120
29.9999
15
15
29.9999
0
0
29.9999
15
74.9998
15
0
15
15
15
44.9999
59.9999
15
15
15
15
15
0
29.9999
0
29.9999
15
0
0
44.9999
0
0
15
15
0
0
0
29.9999
15
15
0
29.9999
15
15
44.9999
0
15
15
15
0
29.9999
59.9999
15
15
29.9999
15
15
29.9999
29.9999
29.9999
15
44.9999
15
74.9998
0
15
44.9999
15
15
29.9999
59.9999
29.9999
105
0
44.9999
0
59.9999
29.9999
29.9999
29.9999
44.9999
15
15
29.9999
44.9999
29.9999
59.9999
59.9999
44.9999
29.9999
44.9999
0
29.9999
74.9998
59.9999
105
29.9999
135
29.9999
44.9999
15
44.9999
59.9999
120
59.9999
44.9999
[truncated: 34,408 more rows]

## Sheet: C_CorrectSpike1_HiReward
59.9999
15
15
135
74.9998
89.9998
105
44.9999
59.9999
15
44.9999
44.9999
44.9999
29.9999
74.9998
74.9998
44.9999
44.9999
105
44.9999
0
29.9999
89.9998
0
89.9998
15
59.9999
59.9999
44.9999
29.9999
44.9999
29.9999
29.9999
29.9999
44.9999
15
74.9998
15
74.9998
29.9999
89.9998
59.9999
29.9999
89.9998
89.9998
59.9999
59.9999
89.9998
0
89.9998
44.9999
44.9999
15
74.9998
44.9999
59.9999
74.9998
15
15
59.9999
29.9999
15
29.9999
44.9999
15
44.9999
74.9998
29.9999
74.9998
29.9999
44.9999
44.9999
74.9998
105
105
89.9998
59.9999
44.9999
29.9999
89.9998
15
44.9999
105
105
89.9998
0
59.9999
15
120
89.9998
29.9999
89.9998
44.9999
29.9999
59.9999
0
15
59.9999
120
89.9998
44.9999
44.9999
15
15
44.9999
29.9999
44.9999
15
0
15
15
15
15
15
59.9999
44.9999
59.9999
15
29.9999
59.9999
29.9999
74.9998
15
59.9999
44.9999
29.9999
15
44.9999
29.9999
15
44.9999
44.9999
15
29.9999
0
29.9999
44.9999
105
59.9999
44.9999
44.9999
15
44.9999
29.9999
44.9999
44.9999
59.9999
59.9999
29.9999
29.9999
15
120
74.9998
29.9999
59.9999
29.9999
105
15
29.9999
89.9998
105
44.9999
29.9999
44.9999
29.9999
44.9999
89.9998
29.9999
59.9999
59.9999
29.9999
15
44.9999
89.9998
59.9999
59.9999
44.9999
74.9998
59.9999
74.9998
59.9999
59.9999
74.9998
89.9998
44.9999
29.9999
15
74.9998
59.9999
0
44.9999
74.9998
0
59.9999
44.9999
74.9998
29.9999
59.9999
0
44.9999
89.9998
44.9999
44.9999
44.9999
44.9999
29.9999
74.9998
0
59.9999
29.9999
29.9999
15
0
15
44.9999
15
44.9999
29.9999
0
59.9999
74.9998
105
44.9999
74.9998
59.9999
29.9999
74.9998
15
44.9999
59.9999
44.9999
74.9998
44.9999
0
0
0
74.9998
44.9999
15
15
59.9999
0
44.9999
89.9998
44.9999
59.9999
44.9999
59.9999
135
29.9999
0
44.9999
89.9998
29.9999
44.9999
105
59.9999
44.9999
15
29.9999
59.9999
0
29.9999
0
120
44.9999
44.9999
29.9999
15
15
29.9999
29.9999
29.9999
29.9999
59.9999
15
15
74.9998
29.9999
29.9999
44.9999
44.9999
15
29.9999
15
15
15
0
44.9999
29.9999
29.9999
29.9999
15
44.9999
59.9999
0
15
59.9999
0
44.9999
15
15
15
59.9999
15
29.9999
0
44.9999
29.9999
29.9999
44.9999
0
0
44.9999
44.9999
29.9999
29.9999
15
44.9999
74.9998
29.9999
15
44.9999
44.9999
74.9998
29.9999
59.9999
29.9999
44.9999
15
59.9999
29.9999
105
74.9998
29.9999
15
44.9999
44.9999
0
59.9999
105
15
89.9998
29.9999
74.9998
44.9999
105
29.9999
74.9998
74.9998
29.9999
29.9999
44.9999
44.9999
89.9998
59.9999
44.9999
29.9999
15
0
15
59.9999
59.9999
15
74.9998
89.9998
59.9999
89.9998
59.9999
74.9998
59.9999
59.9999
59.9999
29.9999
29.9999
59.9999
15
74.9998
15
29.9999
44.9999
29.9999
74.9998
135
15
0
59.9999
0
74.9998
15
0
29.9999
44.9999
120
44.9999
105
74.9998
29.9999
44.9999
74.9998
15
44.9999
29.9999
44.9999
44.9999
44.9999
0
29.9999
15
44.9999
15
29.9999
0
0
44.9999
15
29.9999
15
59.9999
0
0
29.9999
15
15
0
0
0
0
15
0
15
29.9999
15
0
29.9999
29.9999
29.9999
29.9999
29.9999
15
0
44.9999
15
15
0
29.9999
0
15
0
15
0
59.9999
29.9999
0
29.9999
0
44.9999
59.9999
0
29.9999
59.9999
44.9999
44.9999
44.9999
29.9999
0
59.9999
15
89.9998
59.9999
89.9998
59.9999
105
59.9999
44.9999
44.9999
29.9999
74.9998
74.9998
74.9998
74.9998
29.9999
44.9999
29.9999
44.9999
15
29.9999
74.9998
15
15
105
44.9999
44.9999
44.9999
44.9999
29.9999
59.9999
105
29.9999
74.9998
44.9999
15
120
44.9999
44.9999
59.9999
89.9998
105
29.9999
29.9999
59.9999
44.9999
105
120
59.9999
74.9998
89.9998
15
105
59.9999
89.9998
105
105
120
59.9999
59.9999
59.9999
29.9999
59.9999
44.9999
29.9999
44.9999
0
89.9998
44.9999
74.9998
29.9999
74.9998
74.9998
29.9999
29.9999
74.9998
44.9999
29.9999
89.9998
74.9998
29.9999
59.9999
29.9999
15
59.9999
44.9999
44.9999
44.9999
89.9998
15
15
29.9999
59.9999
89.9998
15
74.9998
44.9999
29.9999
29.9999
15
15
29.9999
29.9999
15
15
29.9999
29.9999
15
29.9999
0
0
29.9999
0
15
44.9999
44.9999
59.9999
44.9999
0
29.9999
15
29.9999
15
29.9999
0
44.9999
15
29.9999
15
29.9999
0
15
15
44.9999
44.9999
0
59.9999
44.9999
15
29.9999
89.9998
15
15
29.9999
29.9999
29.9999
0
29.9999
15
0
0
74.9998
44.9999
29.9999
59.9999
59.9999
74.9998
74.9998
15
59.9999
74.9998
44.9999
29.9999
44.9999
44.9999
59.9999
89.9998
59.9999
15
29.9999
89.9998
59.9999
89.9998
0
0
0
74.9998
105
74.9998
105
29.9999
0
0
15
120
29.9999
29.9999
15
15
29.9999
29.9999
29.9999
59.9999
120
59.9999
44.9999
44.9999
29.9999
89.9998
29.9999
44.9999
15
44.9999
89.9998
74.9998
44.9999
59.9999
29.9999
89.9998
74.9998
44.9999
29.9999
74.9998
59.9999
74.9998
89.9998
59.9999
105
74.9998
59.9999
105
89.9998
89.9998
59.9999
44.9999
59.9999
44.9999
44.9999
44.9999
15
59.9999
89.9998
105
44.9999
44.9999
15
44.9999
44.9999
74.9998
29.9999
89.9998
29.9999
44.9999
15
0
89.9998
15
44.9999
29.9999
44.9999
59.9999
15
44.9999
15
59.9999
44.9999
44.9999
44.9999
15
59.9999
74.9998
44.9999
0
29.9999
59.9999
89.9998
0
15
29.9999
15
29.9999
29.9999
15
29.9999
15
29.9999
29.9999
15
29.9999
15
15
29.9999
0
15
29.9999
0
15
59.9999
0
0
44.9999
44.9999
59.9999
29.9999
44.9999
15
29.9999
44.9999
15
44.9999
29.9999
15
44.9999
74.9998
44.9999
29.9999
29.9999
59.9999
0
59.9999
44.9999
74.9998
74.9998
59.9999
29.9999
29.9999
29.9999
29.9999
59.9999
74.9998
15
44.9999
105
15
89.9998
59.9999
29.9999
59.9999
44.9999
59.9999
105
44.9999
105
59.9999
29.9999
74.9998
89.9998
15
74.9998
105
150
15
29.9999
0
44.9999
15
29.9999
0
44.9999
59.9999
44.9999
29.9999
59.9999
29.9999
15
44.9999
59.9999
44.9999
15
44.9999
29.9999
44.9999
44.9999
74.9998
29.9999
15
59.9999
59.9999
89.9998
44.9999
59.9999
59.9999
44.9999
0
74.9998
15
59.9999
15
74.9998
59.9999
105
44.9999
74.9998
74.9998
59.9999
44.9999
29.9999
15
15
0
15
29.9999
29.9999
44.9999
105
15
29.9999
89.9998
89.9998
44.9999
15
29.9999
44.9999
44.9999
74.9998
29.9999
0
29.9999
44.9999
29.9999
15
44.9999
15
29.9999
29.9999
44.9999
15
59.9999
15
0
15
15
0
29.9999
59.9999
59.9999
59.9999
15
29.9999
29.9999
0
29.9999
59.9999
29.9999
29.9999
15
44.9999
0
29.9999
44.9999
44.9999
29.9999
29.9999
15
15
0
15
29.9999
29.9999
29.9999
0
15
59.9999
29.9999
44.9999
15
0
15
15
89.9998
44.9999
29.9999
15
0
15
44.9999
0
105
29.9999
0
15
29.9999
29.9999
59.9999
15
59.9999
29.9999
44.9999
74.9998
15
29.9999
29.9999
74.9998
74.9998
29.9999
15
89.9998
74.9998
15
105
15
44.9999
29.9999
44.9999
44.9999
29.9999
44.9999
59.9999
59.9999
29.9999
89.9998
59.9999
44.9999
29.9999
74.9998
44.9999
59.9999
89.9998
120
135
135
44.9999
29.9999
29.9999
44.9999
44.9999
15
44.9999
29.9999
89.9998
29.9999
29.9999
89.9998
89.9998
150
59.9999
15
59.9999
89.9998
135
44.9999
15
74.9998
0
59.9999
150
59.9999
44.9999
44.9999
89.9998
105
29.9999
105
29.9999
74.9998
150
59.9999
29.9999
120
29.9999
74.9998
120
29.9999
44.9999
74.9998
29.9999
74.9998
120
44.9999
29.9999
105
15
59.9999
44.9999
59.9999
29.9999
44.9999
29.9999
29.9999
74.9998
89.9998
105
120
89.9998
15
74.9998
89.9998
59.9999
15
59.9999
29.9999
59.9999
15
105
44.9999
59.9999
59.9999
29.9999
59.9999
15
59.9999
44.9999
74.9998
15
0
29.9999
59.9999
0
29.9999
0
15
44.9999
29.9999
0
15
44.9999
0
15
15
0
15
15
15
15
29.9999
29.9999
0
29.9999
29.9999
15
0
59.9999
0
15
15
59.9999
0
15
15
29.9999
29.9999
89.9998
29.9999
44.9999
29.9999
0
44.9999
29.9999
0
44.9999
15
29.9999
89.9998
105
59.9999
74.9998
29.9999
44.9999
59.9999
59.9999
44.9999
15
74.9998
44.9999
105
105
44.9999
15
89.9998
44.9999
44.9999
15
59.9999
59.9999
44.9999
29.9999
29.9999
15
44.9999
44.9999
0
15
44.9999
44.9999
0
44.9999
74.9998
29.9999
59.9999
44.9999
74.9998
15
44.9999
120
44.9999
120
0
29.9999
74.9998
29.9999
74.9998
15
15
105
120
74.9998
59.9999
29.9999
29.9999
0
74.9998
89.9998
59.9999
44.9999
74.9998
59.9999
29.9999
29.9999
74.9998
74.9998
15
15
59.9999
44.9999
105
89.9998
29.9999
44.9999
29.9999
0
89.9998
89.9998
74.9998
59.9999
29.9999
74.9998
59.9999
59.9999
29.9999
29.9999
44.9999
59.9999
59.9999
59.9999
15
59.9999
89.9998
44.9999
15
29.9999
15
29.9999
15
29.9999
44.9999
105
29.9999
29.9999
74.9998
59.9999
44.9999
15
15
74.9998
15
29.9999
15
15
44.9999
59.9999
74.9998
15
59.9999
29.9999
0
15
15
15
15
44.9999
29.9999
29.9999
29.9999
15
15
15
29.9999
59.9999
15
15
15
29.9999
44.9999
29.9999
44.9999
29.9999
89.9998
15
44.9999
44.9999
29.9999
15
15
59.9999
29.9999
15
29.9999
0
74.9998
15
89.9998
29.9999
89.9998
29.9999
59.9999
74.9998
105
44.9999
44.9999
44.9999
0
210
89.9998
59.9999
74.9998
59.9999
89.9998
89.9998
74.9998
105
44.9999
15
44.9999
105
74.9998
29.9999
15
44.9999
29.9999
59.9999
74.9998
74.9998
59.9999
59.9999
74.9998
44.9999
44.9999
59.9999
29.9999
59.9999
44.9999
74.9998
74.9998
44.9999
29.9999
59.9999
59.9999
105
44.9999
89.9998
44.9999
0
44.9999
29.9999
59.9999
89.9998
0
29.9999
44.9999
135
44.9999
44.9999
29.9999
29.9999
29.9999
15
0
29.9999
44.9999
89.9998
89.9998
44.9999
29.9999
15
89.9998
59.9999
0
44.9999
15
15
15
44.9999
44.9999
59.9999
59.9999
15
59.9999
59.9999
44.9999
15
74.9998
29.9999
0
59.9999
89.9998
120
59.9999
44.9999
15
59.9999
44.9999
15
15
74.9998
59.9999
74.9998
15
29.9999
59.9999
89.9998
44.9999
44.9999
0
120
105
120
59.9999
44.9999
15
59.9999
44.9999
44.9999
44.9999
15
15
44.9999
44.9999
44.9999
0
15
15
89.9998
59.9999
44.9999
29.9999
44.9999
0
89.9998
29.9999
15
29.9999
44.9999
59.9999
15
15
59.9999
44.9999
15
29.9999
15
29.9999
0
15
59.9999
59.9999
0
15
15
0
44.9999
0
0
0
59.9999
29.9999
29.9999
44.9999
15
15
0
0
29.9999
29.9999
44.9999
15
74.9998
0
29.9999
0
44.9999
44.9999
0
0
44.9999
29.9999
15
15
0
0
15
59.9999
0
29.9999
15
15
15
74.9998
89.9998
15
15
59.9999
74.9998
59.9999
135
44.9999
44.9999
44.9999
44.9999
44.9999
59.9999
59.9999
59.9999
0
105
59.9999
29.9999
29.9999
29.9999
74.9998
59.9999
15
74.9998
44.9999
44.9999
59.9999
44.9999
89.9998
44.9999
59.9999
74.9998
74.9998
15
74.9998
29.9999
44.9999
29.9999
74.9998
15
74.9998
105
15
74.9998
29.9999
59.9999
59.9999
59.9999
15
59.9999
29.9999
15
89.9998
59.9999
29.9999
29.9999
29.9999
44.9999
29.9999
44.9999
29.9999
15
15
135
15
15
29.9999
15
74.9998
89.9998
59.9999
59.9999
89.9998
59.9999
44.9999
74.9998
29.9999
74.9998
44.9999
74.9998
0
0
15
29.9999
89.9998
0
44.9999
89.9998
59.9999
74.9998
44.9999
74.9998
29.9999
89.9998
29.9999
89.9998
29.9999
59.9999
44.9999
29.9999
29.9999
74.9998
89.9998
15
15
44.9999
105
74.9998
29.9999
15
74.9998
44.9999
15
29.9999
44.9999
44.9999
29.9999
74.9998
29.9999
15
15
29.9999
29.9999
59.9999
15
59.9999
29.9999
29.9999
74.9998
74.9998
44.9999
0
89.9998
44.9999
74.9998
120
59.9999
59.9999
105
29.9999
89.9998
29.9999
59.9999
44.9999
29.9999
29.9999
44.9999
29.9999
44.9999
89.9998
105
44.9999
44.9999
0
74.9998
89.9998
105
59.9999
44.9999
0
0
44.9999
59.9999
59.9999
29.9999
74.9998
59.9999
105
15
44.9999
44.9999
59.9999
59.9999
59.9999
120
59.9999
29.9999
0
59.9999
59.9999
59.9999
59.9999
74.9998
29.9999
44.9999
29.9999
15
74.9998
29.9999
44.9999
59.9999
15
0
0
15
15
15
29.9999
44.9999
15
15
29.9999
44.9999
0
59.9999
105
89.9998
44.9999
0
15
0
15
29.9999
0
44.9999
105
15
44.9999
15
44.9999
0
74.9998
0
74.9998
15
29.9999
15
74.9998
44.9999
15
59.9999
0
89.9998
59.9999
59.9999
59.9999
44.9999
120
44.9999
44.9999
0
29.9999
105
105
120
120
165
74.9998
59.9999
74.9998
59.9999
44.9999
15
59.9999
29.9999
59.9999
0
120
29.9999
59.9999
0
120
44.9999
15
74.9998
59.9999
15
15
44.9999
15
29.9999
29.9999
89.9998
59.9999
44.9999
59.9999
59.9999
44.9999
15
29.9999
15
15
74.9998
59.9999
74.9998
59.9999
0
59.9999
44.9999
59.9999
59.9999
0
105
15
29.9999
15
59.9999
59.9999
135
59.9999
15
44.9999
59.9999
0
44.9999
44.9999
29.9999
44.9999
44.9999
89.9998
44.9999
29.9999
59.9999
59.9999
29.9999
74.9998
74.9998
59.9999
59.9999
74.9998
74.9998
150
59.9999
44.9999
135
105
59.9999
29.9999
59.9999
44.9999
44.9999
59.9999
15
15
74.9998
29.9999
29.9999
44.9999
105
29.9999
15
59.9999
15
0
59.9999
29.9999
44.9999
59.9999
89.9998
15
44.9999
59.9999
105
29.9999
89.9998
59.9999
59.9999
44.9999
74.9998
120
44.9999
29.9999
59.9999
0
15
74.9998
44.9999
44.9999
44.9999
59.9999
29.9999
29.9999
44.9999
44.9999
29.9999
29.9999
44.9999
0
44.9999
29.9999
29.9999
0
0
15
74.9998
29.9999
15
44.9999
29.9999
29.9999
29.9999
29.9999
44.9999
59.9999
29.9999
15
44.9999
74.9998
29.9999
59.9999
29.9999
0
15
44.9999
29.9999
15
29.9999
15
105
210
135
165
15
15
15
29.9999
59.9999
15
0
0
15
15
0
0
15
15
15
0
0
0
15
29.9999
29.9999
105
0
15
15
15
44.9999
59.9999
0
59.9999
74.9998
15
44.9999
15
15
59.9999
29.9999
59.9999
74.9998
15
29.9999
59.9999
59.9999
120
15
15
29.9999
29.9999
29.9999
74.9998
44.9999
44.9999
59.9999
15
74.9998
59.9999
59.9999
15
29.9999
15
105
29.9999
29.9999
44.9999
59.9999
59.9999
59.9999
29.9999
29.9999
44.9999
44.9999
89.9998
15
29.9999
29.9999
44.9999
0
105
0
105
29.9999
29.9999
44.9999
29.9999
74.9998
44.9999
0
59.9999
44.9999
59.9999
44.9999
15
0
59.9999
44.9999
59.9999
44.9999
15
44.9999
15
44.9999
59.9999
89.9998
15
74.9998
15
44.9999
0
59.9999
29.9999
59.9999
29.9999
44.9999
44.9999
74.9998
29.9999
44.9999
59.9999
15
59.9999
59.9999
59.9999
44.9999
59.9999
[truncated: 32,440 more rows]

## Sheet: D_RegressionSpike1_LoRewrd
0.00292433
-0.00152519
-0.000382037
-0.00318545
0.00113283
-0.00620178
-0.000821537
-0.00348346
-0.00238678
0.000486843
-0.0037155
-0.00290349
0.00273618
-0.00318773

## Sheet: D_RegressionSpike1_HiRewrd
0.000756867
-0.00404727
-0.00104123
0.00284793
-0.000494974
-0.00289694
-0.00133317
-0.000513443
-0.00213855
-0.00105109
0.000660132
0.00274109
0.000838271
-0.00401442

[truncated: 2 more sheets: SpkSlopes_Div_HemoPred_HiRwrd, SpkSlopes_Div_HemoPred_LoRwrd]
